# Supplementary material for: A theoretical study on the environmental oxidation of fenpyrazamine fungicide initiated by hydroxyl radicals in the aqueous phase
Source: Royal Society of Chemistry journal article supplement (doi:10.1039/d4em00606b), 2024-12-19

**Supplementary Material**

*for*

**A theoretical study on the environmental oxidation  
of fenpyrazamine fungicide initiated by hydroxyl  
radical in the aqueous phase**

## Table of Content

**Figure S1.** Structure of fenpyrazamine (FPA).

**Figure S2.** Plot of Fukui function for radical attack ( $f^0$ ) describing the possible main reactive sites of FPA.

**Figure S3.** Representation of the HOMO, LUMO, and ESP maps of FPA molecule

**Figure S4.** Plot of the molar fraction (%) of the neutral or protonated forms of FPA as a function of the pH in the aqueous phase.

**Figure S5.** Standard Gibbs free reaction energy ( $\Delta_r G^\circ$ ) and standard reaction enthalpy ( $\Delta_r H^\circ$ ) calculated for the further reactions of C39-Add with  $^3\text{O}_2$ ,  $\text{HO}^\bullet$ ,  $^\bullet\text{NO}$ , and  $^\bullet\text{NO}_2$  at 298 K. Units are in  $\text{kJ mol}^{-1}$ . All calculations are performed at the M06-2X/6-311++G(3df,3pd)//M06-2X/6-31+G(d,p) level of theory.

**Table S1.** Acute and chronic toxicity classification based on European Union and Chinese criteria ( $\text{mg L}^{-1}$ ).

**Table S2.** Cartesian coordinates of the structures involved in the abstraction and the addition reactions

**Table S3.** Standard enthalpy ( $\Delta H^\circ_{0\text{K}}$ ) for MCR and MCP, adiabatic energy barrier ( $E_0$ ) for TS, and standard reaction enthalpy ( $\Delta_r H^\circ_{0\text{K}}$ ) for products (P) at 0 K of the FHT reactions, in addition to their standard activation enthalpy ( $\Delta H^{\circ\ddagger}_{298\text{K}}$ ) and standard reaction enthalpy ( $\Delta_r H^\circ_{298\text{K}}$ ) at 298 K. Units are in  $\text{kJ mol}^{-1}$ . All calculations are performed at the M06-2X/6-311++G(3df,3pd)//M06-2X/6-31+G(d,p) level of theory.

**Table S4.** Standard enthalpy, entropy, and Gibbs free energy of activation, and the ones of reaction for all the FHT reactions at 298 K temperature calculated at the M06-2X/6-31+G(d,p) level of theory (level 1, L1), and at the M06-2X/6-311++G(3df,3pd) level of theory (level 2, L2) in the aqueous phase. Differences of standard Gibbs free energy of activation ( $\Delta\Delta G^{\circ\ddagger}$ ) and reaction ( $\Delta\Delta_r G^\circ$ ) between the level 1 and level 2 are also shown.

**Table S5.** Standard enthalpy ( $\Delta H^\circ_{0K}$ ) for MCR and MCP, adiabatic energy barrier ( $E_0$ ) for TS, and standard reaction enthalpy ( $\Delta_r H^\circ_{0K}$ ) for products (P) at 0 K of the RAF reactions, in addition to their standard activation enthalpy ( $\Delta H^{\ddagger}_{298K}$ ) and standard reaction enthalpy ( $\Delta_r H^\circ_{298K}$ ) at 298 K. Units are in kJ mol<sup>-1</sup>. All calculations are performed at the M06-2X/6-311++G(3df,3pd)//M06-2X/6-31+G(d,p) level of theory.

**Table S6.** Standard enthalpy, entropy, and Gibbs free energy of activation, and the ones of reaction for all the RAF reactions at 298 K temperature calculated at the M06-2X/6-31+G(d,p) level of theory (level 1, L1), and at the M06-2X/6-311++G(3df,3pd) level of theory (level 2, L2) in the aqueous phase. Differences of standard Gibbs free energy of activation ( $\Delta\Delta G^{\ddagger}$ ) and reaction ( $\Delta\Delta_r G^\circ$ ) between the level 1 and level 2 are also shown.

**Table S7.** Apparent rate constants ( $k$ , in M<sup>-1</sup> s<sup>-1</sup>) of all oxidation reactions, with the total FHT, RAF, SET, and the overall rate constants in the temperature range of 283-323 K. (The most favourable pathways are in bold).

**Table S8.** Branching ratio ( $\Gamma$ , %) of all oxidation reactions, with the total FHT, RAF, SET, and the overall branching ratio at the temperature range of 283-323 K. (The most favourable pathways are in bold).

**Table S9.** Tunnelling correction estimated by the Eckart method for formal hydrogen transfer (FHT) at the temperature T from 283 to 333 K.

**Table S10.** Tunnelling correction estimated by the Eckart method for Radical adduct formation (RAF) at the temperature T from 283 to 333 K.

**Table S11.** Cartesian coordinates of all intermediate species involved in the further reactions of H15-Abs product at 298 K.

**Table S12.** Standard enthalpy ( $\Delta_r H^\circ_{298K}$ ), and Gibbs free energy of reaction ( $\Delta_r G^\circ_{298K}$ ) for the O<sub>2</sub>-addition to various carbon atom on the H15-Abs intermediate resulted from the most dominant FHT reaction at H15 hydrogen atom. Calculations were performed at the M06-2X/6-311++G(3df,3pd)//M06-2X/6-31+G(d,p) level of theory in water.

**Table S13.** Cartesian coordinates of all intermediate species involved in the further reactions of C39-Add product.

## Methodology

The determination of the rate constant follows the formulation introduced by Eyring (Eyring, 1935).

$$k_{TST} = \left( \frac{k_B T}{h} \right) \times \frac{q_{TS}}{\prod q_{R(s)}} \times e^{-E_0/RT} \quad \text{Eq. 1}$$

where  $q_{R(s)}$  and  $q_{TS}$  refer to the functions of total reagent partition and transition state, and  $E_0$  corresponds to the adiabatic vibration barrier, including all energy corrections (ZPE and SOC corrections). Its formula is given below:

$$E_0 = \Delta E^\ddagger + \Delta E_{ZPE} + \Delta E_{SOC} \quad \text{Eq. 2}$$

For a bimolecular reaction:

$$\Delta E_{ZPE} = ZPE_{TS} - ZPE_{Reactant1} - ZPE_{Reactant2} \quad \text{Eq. 3}$$

$$\Delta E_{SOC} = SOC_{TS} - SOC_{Reactant1} - SOC_{Reactant2} \quad \text{Eq. 4}$$

$$\Delta E^\ddagger = E_{TS}^\ddagger - E_{Reactant1}^\ddagger - E_{Reactant2}^\ddagger \quad \text{Eq. 5}$$

where  $E^\ddagger$  is the electronic energy obtained from the frequency calculations without correction. Its unit is Hartree (a Hartree equals 2625.5 kJ mol<sup>-1</sup>).

The kinetics for the abstraction and the addition reactions between FPA and HO• radical was studied using the pre-reactive complexes scheme proposed by Singleton and Cvetanovic (Singleton and Cvetanovic, 1976).

Briefly, a two-step mechanism is considered:

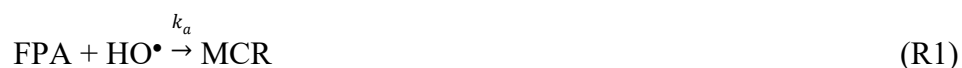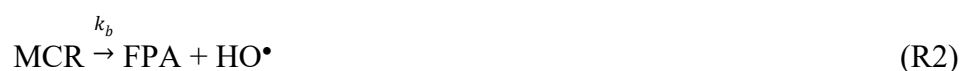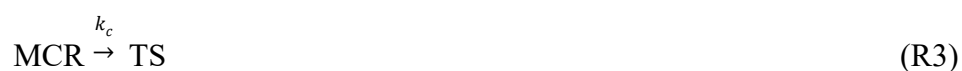

This scheme involved a fast pre-equilibrium between the reactants and the pre-reactive complex (MCR), leading to the hydrogen abstraction/radical addition followed by post-reactive complexes and products. The effective rate  $r$  applied to reactions (R1-R2) for steady-state conditions (the concentration of the intermediates is constant, *i.e.*, the effective rate of product formation is constant and does not depend on time) is defined as follows (Eq. 6):

$$r = r_c = k [\text{HO}^\bullet] [\text{FPA}] \quad \text{Eq. 6}$$

6

where  $k$  is the rate constant for each pathway, and it is calculated by the following equation (Eq. 7):

$$k = \frac{k_c k_a}{k_b + k_c} \quad \text{Eq. 7}$$

The changes in entropy in the reverse reaction (R2) are much more significant than in the reaction (R3). Thus,  $k_b$  is expected to be larger than  $k_c$ , and  $k$  can be written as (Eq. 8):

$$k = \frac{k_c k_a}{k_b} = k_c K_{a,b} \quad \text{Eq. 8}$$

8

where  $K_{a,b}$  is the equilibrium constant for the separated reactants versus the pre-reactive complex (MCR). The equilibrium constant ( $K_{a,b}$ ) of the first step is computed based on basic statistical thermodynamics principles, while  $k_c$  is calculated by the classical TST formula (Evans and Polanyi, 1935) (Eq. 9) (Eq. 10).

$$K_{a,b}(T) = \frac{q_{MCR}(T)}{q_{HO\cdot}(T)q_{FPA}(T)} \exp\left(\frac{E_{FPA} + E_{HO\cdot} - E_{MCR}}{k_B T}\right) \quad \text{Eq. 9}$$

$$k_c(T) = \kappa(T) \times \frac{k_B T}{h} \times \frac{q_{TS}(T)}{q_{MCR}(T)} \times \exp\left(-\frac{E_{TS} - E_{MCR}}{k_B T}\right) \quad \text{Eq. 10}$$

The terms  $q_{HO\cdot}(T)$ ,  $q_{Pesticide}(T)$ ,  $q_{MCR}(T)$ , and  $q_{TS}(T)$  are the total partition functions of the reactants ( $HO\cdot$  and FPA), MCR, and TS at the temperature T (K), respectively.  $E_{HO\cdot}$ ,  $E_{FPA}$ ,  $E_{MCR}$ , and  $E_{TS}$  are the total potential energies at 0 K (including the zero-point energy and SOC corrections) of the  $HO\cdot$  radical, pesticide, MCR, and TS, respectively. The  $\kappa(T)$  is the transmission coefficient used for the tunnelling correction estimated by the Eckart method (Eckart, 1930) at the temperature T.

For the SET (single electron transfer) reaction, the reaction barrier was calculated by Marcus' theory (Marcus, 1956, 1957a, 1957b) as follows (Eq. 11):

$$\Delta G_{SET}^{\ddagger} = \frac{\lambda}{4} \left(1 + \frac{\Delta_r G_{SET}^{\circ}}{\lambda}\right)^2 \quad \text{Eq. 11}$$

$\Delta_r G_{SET}^{\circ}$  is the standard Gibbs free reaction energy calculated from the energy difference between reactants and products. The  $\lambda$  is the nuclear reorganization energy, which is calculated by the below equation (Eq. 12):

$$\lambda = \Delta H_{SET}^{\circ} - \Delta_r G_{SET}^{\circ} \quad \text{Eq. 12}$$

where the  $\Delta H_{SET}^{\circ}$  is the non-adiabatic energy between the reactants and products.

In the aqueous phase, the apparent rate constant ( $k_{app}$ ) is typically including a diffusion limit, especially for the reaction with  $HO\cdot$  radical that has the rate constant close to the diffusion limit of the solution. The  $k_{app}$  was calculated based on the Collins-Kimball (Collins and Kimball, 1949) as follows (Eq. 13):

$$k_{app} = \frac{k_D k}{k_D + k} \quad \text{Eq. 13}$$

where  $k$  is the thermal rate constant, and  $k_D$  is the steady-state Smoluchowski (Smoluchowski, 1918) rate constant for an irreversible bimolecular diffusion-controlled reaction (**Eq. 14**):

$$k_D = 4\pi R_{AB} D_{AB} N_A \quad \text{Eq. 14}$$

where  $R_{AB}$  is the reaction distance,  $N_A$  is the Avogadro number, and  $D_{AB}$  is the mutual diffusion coefficient of reactants. It can be estimated from  $D_A$  and  $D_B$ , according to Truhlar (Truhlar, 1985). The  $D_A$  and  $D_B$  values were calculated from the Stokes-Einstein approach (Einstein, 1905; Stokes, 2009) (**Eq. 15**):

$$D_{A \text{ or } B} = \frac{k_B T}{6\pi\eta a_{A \text{ or } B}} \quad \text{Eq. 15}$$

where  $\eta$  denotes the solvent's viscosity (*i.e.*, the viscosity of water is  $8.91 \times 10^{-4}$  Pa s (Medina *et al.*, 2013)) varied as a function of temperature, and  $a$  is the radius of solute.

The rate constants were calculated with the GPOP software (Miyoshi, 2022). The total rate constant ( $k_{\text{total}}$ ) of each reaction mechanism was derived by adding up the rate constant ( $k_i$ ) of all individual reactions. The overall rate constant ( $k_{\text{overall}}$ ) (Bentz *et al.*, 2018; Galano and Alvarez-Idaboy, 2013) was obtained by summing up the total rate constant of the three mechanisms (*i.e.*,  $k_{\text{overall}} = k_{\text{total}}(\text{FHT}) + k_{\text{total}}(\text{RAF}) + k_{\text{total}}(\text{SET})$ ).  $k_{\text{total}}(\text{FHT})$  is the total rate constant of the H-abstraction reactions (formal hydrogen transfer),  $k_{\text{total}}(\text{RAF})$  is the total rate constant of the HO $\cdot$ -addition reactions (radical adduct formation), and  $k_{\text{total}}(\text{SET})$  is the total rate constant of the charge transfer reactions (single electron transfer).

The branching ratios for each reaction are determined by dividing their respective apparent rate constants ( $k_i$ ) by the overall rate constant ( $k_{\text{overall}}$ ).

## References

- Bentz, E.N., Lobayan, R.M., Martínez, H., Redondo, P., Largo, A., 2018. Intrinsic Antioxidant Potential of the Aminoindole Structure: A Computational Kinetics Study of Tryptamine. *J. Phys. Chem. B* 122, 6386–6395. <https://doi.org/10.1021/acs.jpcc.8b03807>
- Collins, F.C., Kimball, G.E., 1949. Diffusion-controlled reaction rates. *Journal of Colloid Science* 4, 425–437. [https://doi.org/10.1016/0095-8522\(49\)90023-9](https://doi.org/10.1016/0095-8522(49)90023-9)
- Eckart, C., 1930. The Penetration of a Potential Barrier by Electrons. *Phys. Rev.* 35, 1303–1309. <https://doi.org/10.1103/PhysRev.35.1303>
- Einstein, A., 1905. Zur Elektrodynamik bewegter Körper. *Annalen der Physik* 322, 891–921. <https://doi.org/10.1002/andp.19053221004>
- EU, 1967. General classification and labeling requirements for dangerous substances and preparations. Annex VI of Directive 67/548/EEC. [https://ec.europa.eu/environment/archives/dansub/pdfs/annex6\\_en.pdf](https://ec.europa.eu/environment/archives/dansub/pdfs/annex6_en.pdf) (accessed 6.26.24).
- Evans, M.G., Polanyi, M., 1935. Some applications of the transition state method to the calculation of reaction velocities, especially in solution. *Trans. Faraday Soc.* 31, 875–894. <https://doi.org/10.1039/TF9353100875>
- Eyring, H., 1935. The Activated Complex in Chemical Reactions. *The Journal of Chemical Physics* 3, 107–115. <https://doi.org/10.1063/1.1749604>

- Galano, A., Alvarez-Idaboy, J.R., 2013. A computational methodology for accurate predictions of rate constants in solution: Application to the assessment of primary antioxidant activity. *Journal of Computational Chemistry* 34, 2430–2445. <https://doi.org/10.1002/jcc.23409>
- Marcus, R.A., 1957a. On the Theory of Oxidation-Reduction Reactions Involving Electron Transfer. II. Applications to Data on the Rates of Isotopic Exchange Reactions. *The Journal of Chemical Physics* 26, 867–871. <https://doi.org/10.1063/1.1743423>
- Marcus, R.A., 1957b. On the Theory of Oxidation-Reduction Reactions Involving Electron Transfer. III. Applications to Data on the Rates of Organic Redox Reactions. *The Journal of Chemical Physics* 26, 872–877. <https://doi.org/10.1063/1.1743424>
- Marcus, R.A., 1956. On the Theory of Oxidation-Reduction Reactions Involving Electron Transfer. I. *The Journal of Chemical Physics* 24, 966–978. <https://doi.org/10.1063/1.1742723>
- Medina, M.E., Iuga, C., Alvarez-Idaboy, J.R., 2013. Antioxidant activity of propyl gallate in aqueous and lipid media: a theoretical study. *Phys. Chem. Chem. Phys.* 15, 13137–13146. <https://doi.org/10.1039/C3CP51644J>
- MEE, 2004. Chinese hazard evaluation guideline for the hazard evaluation of new chemical substances (HJ/T 154–2004). Ministry of Ecology and Environment. [https://english.mee.gov.cn/special\\_reports/chemical\\_regulation/newchemicals/200712/t20071217\\_115157.shtml](https://english.mee.gov.cn/special_reports/chemical_regulation/newchemicals/200712/t20071217_115157.shtml) (accessed 6.26.24).
- Miyoshi, A, n.d. GPOP software. Revision 2022.01.20m1. <http://akrmys.com/gpop/>
- Singleton, D.L., Cvetanovic, R.J., 1976. Temperature dependence of the reaction of oxygen atoms with olefins. *J. Am. Chem. Soc.* 98, 6812–6819. <https://doi.org/10.1021/ja00438a006>
- Smoluchowski, M. v, 1918. Versuch einer mathematischen Theorie der Koagulationskinetik kolloider Lösungen. *Zeitschrift für Physikalische Chemie* 92U, 129–168. <https://doi.org/10.1515/zpch-1918-9209>
- Stokes, G.G., 2009. *Mathematical and Physical Papers*. Cambridge Core. <https://doi.org/10.1017/CBO9780511702297>
- Truhlar, D.G., 1985. Nearly encounter-controlled reactions: The equivalence of the steady-state and diffusional viewpoints. *Journal of Chemical Education* 62, 104–106. <https://doi.org/10.1021/ed062p104>

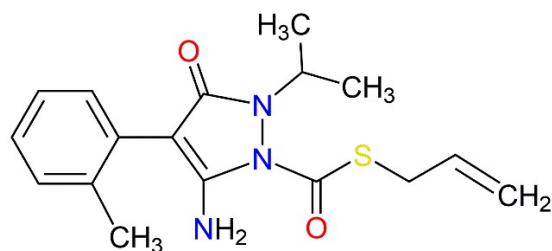

**Figure S1.** Structure of fenpyrazamine (FPA).

**Table S1.** Acute and chronic toxicity classification based on European Union and Chinese criteria ( $\text{mg L}^{-1}$ ).

| Classification     | Acute toxicity <sup>1</sup>                                | Chronic toxicity <sup>2</sup> |
|--------------------|------------------------------------------------------------|-------------------------------|
| <b>Not harmful</b> | $\text{LC}_{50} > 100$ or $\text{EC}_{50} > 100$           | $\text{ChV} > 10$             |
| <b>Harmful</b>     | $10 < \text{LC}_{50} < 100$ or $10 < \text{EC}_{50} < 100$ | $1 < \text{ChV} < 10$         |
| <b>Toxic</b>       | $1 < \text{LC}_{50} < 10$ or $1 < \text{EC}_{50} < 10$     | $0.1 < \text{ChV} < 1$        |
| <b>Very toxic</b>  | $\text{LC}_{50} < 1$ or $\text{EC}_{50} < 1$               | $\text{ChV} < 0.1$            |

<sup>1</sup>Criteria set by the European Union (described in Annex VI of Directive 67/548/EEC) (EU, 1967).

<sup>2</sup>Criteria set by the Chinese hazard evaluation guidelines for new chemical substances (HJ/T 154–2004) (MEE, 2004).

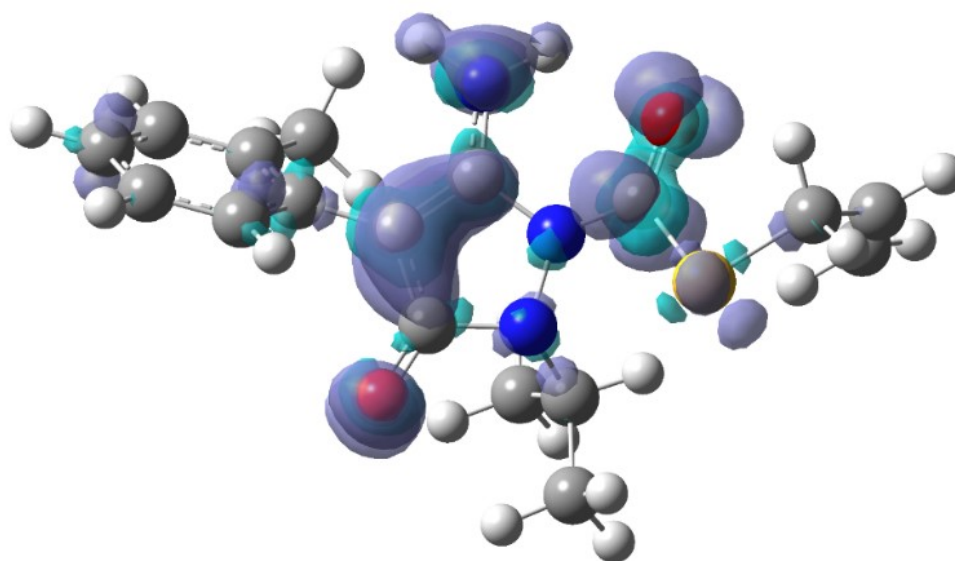

**Figure S2.** Plot of Fukui function for radical attack ( $f^0$ ) describing the possible main reactive sites of FPA.



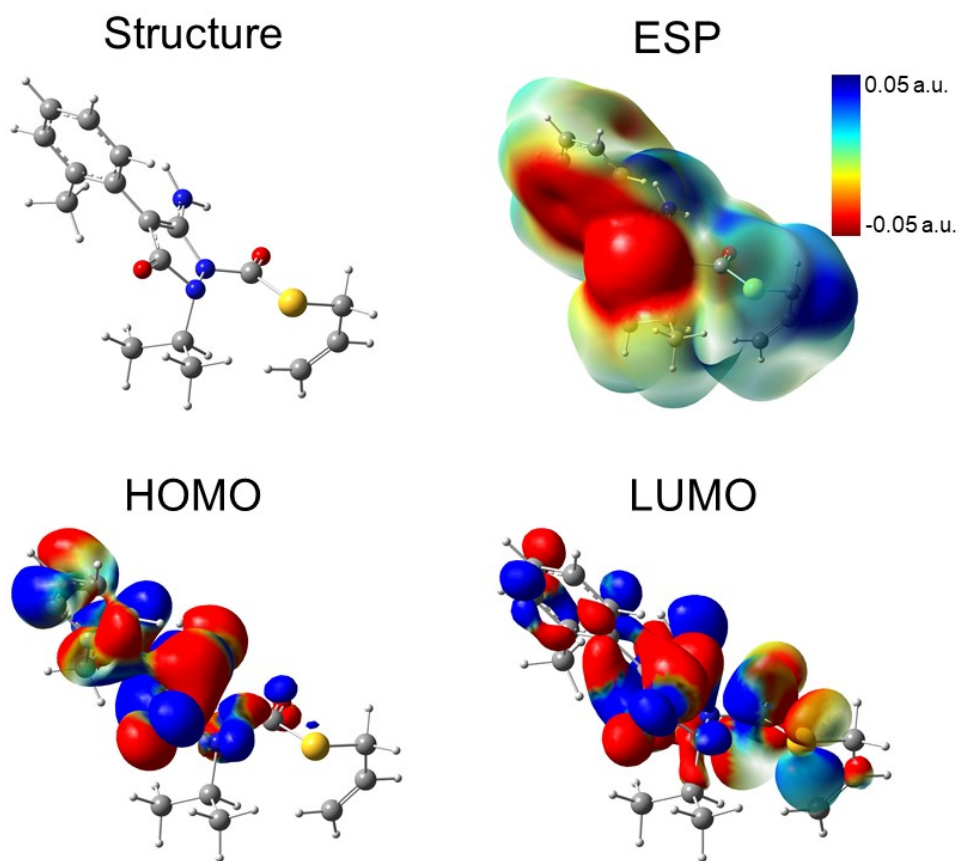

**Figure S3.** Representation of the HOMO, LUMO, and ESP maps of FPA molecule.

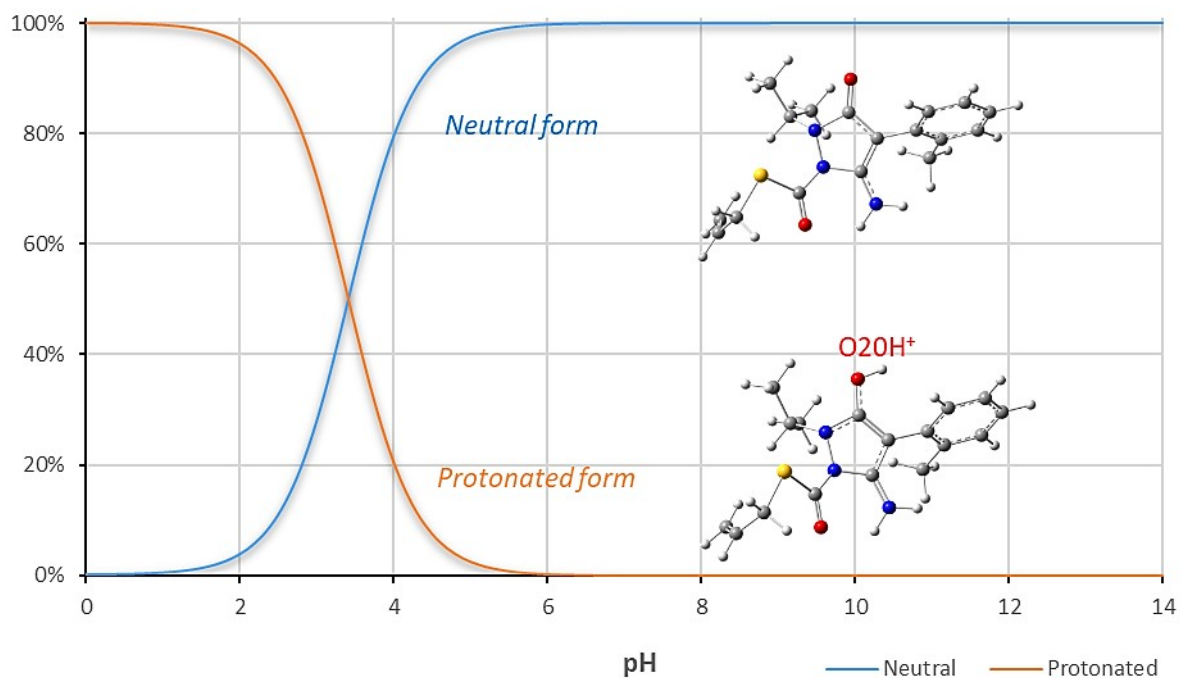

**Figure S4.** Plot of the molar fraction (%) of the neutral or protonated forms of FPA as a function of the pH in the aqueous phase.

**Table S2.** Cartesian coordinates of the structures involved in the abstraction and the addition reactions.

| MAIN MOLECULE |             |           |           |                                                      |           |           |                            |                                                                                     |
|---------------|-------------|-----------|-----------|------------------------------------------------------|-----------|-----------|----------------------------|-------------------------------------------------------------------------------------|
| Fenpyrazamine |             |           |           |                                                      |           |           |                            |                                                                                     |
|               | Coordinates |           |           | Unscaled vibrational frequencies (cm <sup>-1</sup> ) |           |           | Rotational constants (GHz) | Structure                                                                           |
| C             | -2.870015   | -0.217919 | -0.292138 | 26.7156                                              | 35.3687   | 44.9470   | 0.48750                    | 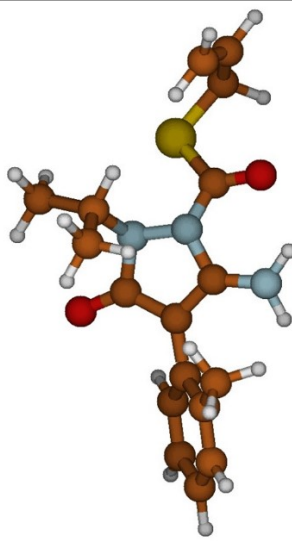 |
| C             | -3.639880   | -0.683934 | 0.793455  | 54.4311                                              | 66.6066   | 73.2203   | 0.14167                    |                                                                                     |
| C             | -5.017303   | -0.860191 | 0.606583  | 87.8598                                              | 97.1976   | 114.4062  | 0.12953                    |                                                                                     |
| C             | -5.632753   | -0.570426 | -0.608178 | 133.9135                                             | 144.1414  | 154.2928  |                            |                                                                                     |
| C             | -4.870437   | -0.087209 | -1.672960 | 161.8094                                             | 186.7865  | 215.2015  |                            |                                                                                     |
| C             | -3.499636   | 0.083567  | -1.510485 | 222.9496                                             | 227.7855  | 253.4631  |                            |                                                                                     |
| C             | -1.417793   | 0.006625  | -0.178666 | 261.7054                                             | 266.0225  | 279.3888  |                            |                                                                                     |
| C             | -3.032678   | -0.976238 | 2.141552  | 294.4980                                             | 303.9958  | 334.6480  |                            |                                                                                     |
| H             | -5.615121   | -1.217506 | 1.441445  | 360.6353                                             | 364.2977  | 421.7859  |                            |                                                                                     |
| H             | -6.703380   | -0.712186 | -0.720653 | 442.8102                                             | 458.8974  | 464.2604  |                            |                                                                                     |
| H             | -5.339250   | 0.149829  | -2.622920 | 477.7973                                             | 506.4569  | 533.8859  |                            |                                                                                     |
| H             | -2.894943   | 0.449661  | -2.336081 | 535.4112                                             | 543.0103  | 557.9964  |                            |                                                                                     |
| H             | -2.168101   | -0.335954 | 2.340405  | 573.7922                                             | 599.9853  | 630.6603  |                            |                                                                                     |
| H             | -2.697008   | -2.016973 | 2.212352  | 645.4350                                             | 659.4660  | 692.0356  |                            |                                                                                     |
| H             | -3.771872   | -0.818509 | 2.930653  | 710.7243                                             | 728.9700  | 743.5533  |                            |                                                                                     |
| C             | -0.438947   | -0.904144 | 0.169538  | 773.4618                                             | 793.5494  | 796.9607  |                            |                                                                                     |
| N             | 0.809533    | -0.264620 | 0.156832  | 832.8079                                             | 875.2893  | 901.6540  |                            |                                                                                     |
| N             | 0.639453    | 1.076878  | -0.248184 | 908.0342                                             | 931.1367  | 941.8259  |                            |                                                                                     |
| C             | -0.760814   | 1.245283  | -0.446181 | 944.7903                                             | 961.7032  | 964.4609  |                            |                                                                                     |
| O             | -1.243105   | 2.344001  | -0.751867 | 981.7514                                             | 988.1375  | 1006.0898 |                            |                                                                                     |
| N             | -0.549483   | -2.204832 | 0.430739  | 1023.1152                                            | 1026.4822 | 1033.6979 |                            |                                                                                     |
| H             | 0.268872    | -2.768672 | 0.617206  | 1061.2465                                            | 1062.1689 | 1078.7151 |                            |                                                                                     |
| H             | -1.446632   | -2.651596 | 0.291770  | 1119.7839                                            | 1138.4895 | 1165.8341 |                            |                                                                                     |
| C             | 1.282759    | 2.031390  | 0.721045  | 1167.4014                                            | 1179.8736 | 1201.0677 |                            |                                                                                     |
| C             | 0.460634    | 2.173490  | 1.996415  | 1216.7317                                            | 1224.8261 | 1237.1942 |                            |                                                                                     |
| C             | 1.579047    | 3.359031  | 0.042193  | 1262.4925                                            | 1296.6967 | 1304.5015 |                            |                                                                                     |
| H             | 2.236272    | 1.558746  | 0.970257  | 1311.5482                                            | 1324.4830 | 1328.8677 |                            |                                                                                     |
| H             | 1.028572    | 2.752541  | 2.729611  | 1354.2982                                            | 1364.1989 | 1401.3312 |                            |                                                                                     |
| H             | 0.241530    | 1.193123  | 2.433022  | 1405.6783                                            | 1410.0147 | 1423.3294 |                            |                                                                                     |
| H             | -0.482320   | 2.695021  | 1.804405  | 1425.1521                                            | 1441.4714 | 1464.3208 |                            |                                                                                     |
| H             | 0.664072    | 3.910506  | -0.182180 | 1469.6009                                            | 1476.4691 | 1477.3631 |                            |                                                                                     |
| H             | 2.190601    | 3.965795  | 0.715993  | 1483.3390                                            | 1491.4150 | 1493.0242 |                            |                                                                                     |
| H             | 2.137041    | 3.205038  | -0.885897 | 1501.1199                                            | 1541.8962 | 1601.8950 |                            |                                                                                     |
| C             | 1.980032    | -0.931953 | -0.206183 | 1624.0701                                            | 1648.0052 | 1681.7404 |                            |                                                                                     |

|   |          |           |           |           |           |           |  |  |
|---|----------|-----------|-----------|-----------|-----------|-----------|--|--|
| O | 2.182143 | -2.081074 | 0.142193  | 1711.9317 | 1737.7610 | 1746.0987 |  |  |
| S | 3.104000 | 0.018451  | -1.192667 | 3067.6576 | 3067.8043 | 3081.7549 |  |  |
| C | 4.491602 | -1.151687 | -1.203313 | 3098.4280 | 3124.0777 | 3134.6905 |  |  |
| C | 5.282238 | -1.258157 | 0.070703  | 3146.8993 | 3148.1385 | 3157.1663 |  |  |
| C | 5.038155 | -0.651428 | 1.230424  | 3158.7986 | 3159.2385 | 3173.8264 |  |  |
| H | 4.115439 | -2.133335 | -1.504968 | 3178.7406 | 3186.7289 | 3206.1106 |  |  |
| H | 5.135117 | -0.795048 | -2.014476 | 3212.4616 | 3224.6160 | 3237.9011 |  |  |
| H | 6.139694 | -1.925118 | -0.014946 | 3266.1728 | 3585.8116 | 3717.9866 |  |  |
| H | 5.688692 | -0.813641 | 2.084081  |           |           |           |  |  |
| H | 4.194649 | 0.021087  | 1.372460  |           |           |           |  |  |

| ABSTRACTION REACTION                                                              |           |           |                                                                                    |   |           |                                                                                     |           |   |                                                                                     |           |           |   |           |           |           |
|-----------------------------------------------------------------------------------|-----------|-----------|------------------------------------------------------------------------------------|---|-----------|-------------------------------------------------------------------------------------|-----------|---|-------------------------------------------------------------------------------------|-----------|-----------|---|-----------|-----------|-----------|
| H9-Abs                                                                            |           |           |                                                                                    |   |           |                                                                                     |           |   |                                                                                     |           |           |   |           |           |           |
| MCR                                                                               |           |           | TS                                                                                 |   |           | MCP                                                                                 |           |   | RAD                                                                                 |           |           |   |           |           |           |
| 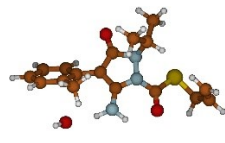 |           |           |  |   |           |  |           |   |  |           |           |   |           |           |           |
| C                                                                                 | -2.703730 | 0.115767  | -0.275942                                                                          | C | -2.524313 | 0.136477                                                                            | -0.588807 | C | -2.543918                                                                           | 0.390624  | -0.537979 | C | -0.802057 | 1.233351  | -0.436192 |
| C                                                                                 | -3.489550 | -0.298374 | 0.823405                                                                           | C | -3.387820 | -0.517263                                                                           | 0.319196  | C | -3.429358                                                                           | -0.310413 | 0.316595  | C | -1.449881 | -0.010495 | -0.166289 |
| C                                                                                 | -4.881401 | -0.374298 | 0.657355                                                                           | C | -4.738932 | -0.550056                                                                           | -0.017901 | C | -4.765071                                                                           | -0.223203 | -0.025060 | C | -0.463900 | -0.916238 | 0.177882  |
| C                                                                                 | -5.492565 | -0.037376 | -0.546820                                                                          | C | -5.282475 | 0.041570                                                                            | -1.145226 | C | -5.321004                                                                           | 0.477951  | -1.067107 | N | 0.779551  | -0.268358 | 0.158753  |
| C                                                                                 | -4.712582 | 0.392711  | -1.621435                                                                          | C | -4.417296 | 0.712846                                                                            | -2.014435 | C | -4.424667                                                                           | 1.189710  | -1.878049 | N | 0.599477  | 1.072086  | -0.245255 |
| C                                                                                 | -3.330100 | 0.464692  | -1.481981                                                                          | C | -3.055614 | 0.750347                                                                            | -1.734895 | C | -3.059489                                                                           | 1.136069  | -1.612834 | C | -2.899999 | -0.242259 | -0.267151 |
| C                                                                                 | -1.239273 | 0.236158  | -0.179670                                                                          | C | -1.075808 | 0.230297                                                                            | -0.346272 | C | -1.091236                                                                           | 0.394510  | -0.303341 | C | -3.649036 | -0.732835 | 0.830420  |
| C                                                                                 | -2.884282 | -0.620728 | 2.164951                                                                           | C | -2.905613 | -1.138376                                                                           | 1.603455  | C | -2.979434                                                                           | -1.071981 | 1.536881  | C | -5.001404 | -0.889082 | 0.596868  |
| H                                                                                 | -5.488970 | -0.691354 | 1.501482                                                                           | H | -5.479242 | -1.126860                                                                           | 0.701682  | H | -5.015039                                                                           | -3.136679 | 0.974146  | C | -5.689470 | -0.600473 | -0.557020 |
| H                                                                                 | -6.571969 | -0.101552 | -0.643702                                                                          | H | -6.347774 | -0.013707                                                                           | -1.345394 | H | -6.389649                                                                           | 0.489896  | -1.258029 | C | -4.929229 | -0.090182 | -1.619498 |
| H                                                                                 | -5.177611 | 0.664419  | -2.563958                                                                          | H | -4.805674 | 1.192335                                                                            | -2.907410 | H | -4.794878                                                                           | 1.771142  | -2.717059 | C | -3.555835 | 0.078799  | -1.468289 |
| H                                                                                 | -2.715043 | 0.787053  | -2.317859                                                                          | H | -2.377773 | 1.256459                                                                            | -2.416658 | H | -2.365850                                                                           | 1.674328  | -2.252504 | C | -3.045856 | -1.038895 | 2.177099  |
| H                                                                                 | -2.000918 | -0.005699 | 2.362050                                                                           | H | -1.991041 | -0.656082                                                                           | 1.958596  | H | -2.051214                                                                           | -0.657051 | 1.939877  | N | -0.564551 | -2.217298 | 0.437756  |
| H                                                                                 | -2.574667 | -1.670349 | 2.223829                                                                           | H | -2.695288 | -2.205734                                                                           | 1.474178  | H | -2.804220                                                                           | -2.128664 | 1.304997  | C | 1.953335  | -0.928629 | -0.208770 |
| H                                                                                 | -3.614624 | -0.448789 | 2.959034                                                                           | H | -3.671004 | -1.044930                                                                           | 2.377579  | H | -3.749624                                                                           | -1.028002 | 2.310678  | S | 3.065427  | 0.027059  | -1.203072 |
| C                                                                                 | -0.322517 | -0.735274 | 0.181886                                                                           | C | -0.179630 | -0.799531                                                                           | -0.129603 | C | -0.244453                                                                           | -0.692008 | -0.185750 | C | 4.461220  | -1.133262 | -1.217747 |
| N                                                                                 | 0.965249  | -0.177736 | 0.158740                                                                           | N | 1.100276  | -0.259648                                                                           | 0.060177  | N | 1.060725                                                                            | -0.232323 | 0.041138  | C | 5.258137  | -1.231658 | 0.052994  |
| N                                                                                 | 0.884338  | 1.165835  | -0.266217                                                                          | N | 1.039148  | 1.143458                                                                            | -0.080511 | N | 1.065586                                                                            | 1.179019  | 0.029629  | C | 5.015011  | -0.624348 | 1.212599  |
| C                                                                                 | -0.501871 | 1.422848  | -0.469502                                                                          | C | -0.330062 | 1.448018                                                                            | -0.322819 | C | -0.288060                                                                           | 1.568743  | -0.174595 | C | 1.243879  | 2.031267  | 0.718841  |
| O                                                                                 | -0.908754 | 2.546413  | -0.794441                                                                          | O | -0.724307 | 2.616068                                                                            | -0.430431 | O | -0.626581                                                                           | 2.758878  | -0.171754 | C | 1.530360  | 3.358760  | 0.035579  |
| N                                                                                 | -0.518685 | -2.021142 | 0.457587                                                                           | N | -0.384230 | -2.114680                                                                           | -0.137494 | N | -0.509962                                                                           | -1.990244 | -0.310271 | O | -1.292781 | 2.328820  | -0.737383 |
| H                                                                                 | 0.266002  | -2.627069 | 0.656864                                                                           | H | 0.388712  | -2.758323                                                                           | -0.030627 | H | 0.231878                                                                            | -2.676265 | -0.264140 | C | 0.427894  | 2.171937  | 1.998225  |
| H                                                                                 | -1.444455 | -2.415277 | 0.304661                                                                           | H | -1.286806 | -2.463677                                                                           | -0.433603 | H | -1.430452                                                                           | -2.269669 | -0.624454 | O | 2.164444  | -2.075368 | 0.141469  |
| C                                                                                 | 1.584063  | 2.089826  | 0.693625                                                                           | C | 1.666169  | 1.846454                                                                            | 1.093120  | C | 1.729684                                                                            | 1.741202  | 1.257454  | H | -6.760588 | -0.751844 | -0.650208 |
| C                                                                                 | 0.770897  | 2.296042  | 1.965938                                                                           | C | 0.767463  | 1.794369                                                                            | 2.322740  | C | 0.833422                                                                            | 1.621110  | 2.484161  | H | -5.410004 | 0.163289  | -2.559600 |
| C                                                                                 | 1.960598  | 3.389740  | 0.001119                                                                           | C | 2.077482  | 3.258120                                                                            | 0.706847  | C | 2.209927                                                                            | 3.159974  | 0.997482  | H | -2.966171 | 0.461790  | -2.296434 |
| H                                                                                 | 2.507016  | 1.562700  | 0.949025                                                                           | H | 2.573784  | 1.272719                                                                            | 1.297172  | H | 2.608387                                                                            | 1.107564  | 1.402147  | H | -2.174414 | -0.406880 | 2.371361  |
| H                                                                                 | 1.370833  | 2.850873  | 2.692352                                                                           | H | 1.314595  | 2.181608                                                                            | 3.186492  | H | 1.402656                                                                            | 1.897716  | 3.375709  | H | -2.725329 | -2.084236 | 2.240953  |
| H                                                                                 | 0.494736  | 1.336011  | 2.415063                                                                           | H | 0.464916  | 0.765317                                                                            | 2.544502  | H | 0.478811                                                                            | 0.592718  | 2.612135  | H | -3.784056 | -0.873034 | 2.964949  |
| H                                                                                 | -0.139972 | 2.868987  | 1.765454                                                                           | H | -0.129702 | 2.405680                                                                            | 2.183551  | H | -0.031452                                                                           | 2.287744  | 2.409862  | H | 0.258087  | -2.774799 | 0.624872  |
| H                                                                                 | 1.080660  | 3.993537  | -0.228435                                                                          | H | 1.209278  | 3.900037                                                                            | 0.546762  | H | 1.374863                                                                            | 3.856282  | 0.901016  | H | -1.458802 | -2.671321 | 0.303428  |

|   |           |           |           |   |           |           |           |   |           |           |           |   |           |           |           |
|---|-----------|-----------|-----------|---|-----------|-----------|-----------|---|-----------|-----------|-----------|---|-----------|-----------|-----------|
| H | 2.608642  | 3.964809  | 0.668593  | H | 2.674443  | 3.681298  | 1.519677  | H | 2.828645  | 3.478084  | 1.841386  | H | 2.200725  | 1.563133  | 0.963651  |
| H | 2.507253  | 3.192515  | -0.925534 | H | 2.686642  | 3.251460  | -0.201580 | H | 2.816601  | 3.204724  | 0.088446  | H | 0.997977  | 2.753308  | 2.727890  |
| C | 2.089843  | -0.923949 | -0.193826 | C | 2.254815  | -0.927866 | -0.349440 | C | 2.179216  | -0.912038 | -0.443849 | H | 0.214044  | 1.191281  | 2.436832  |
| O | 2.219604  | -2.078216 | 0.171843  | O | 2.361205  | -2.133973 | -0.220280 | O | 2.228869  | -2.128513 | -0.431467 | H | -0.517585 | 2.690469  | 1.810746  |
| S | 3.270528  | -0.060635 | -1.194627 | S | 3.505157  | 0.109275  | -1.056292 | S | 3.472903  | 0.128228  | -1.062640 | H | 0.611568  | 3.905002  | -0.186002 |
| C | 4.587287  | -1.310082 | -1.179816 | C | 4.822315  | -1.131606 | -1.198871 | C | 4.725082  | -1.155483 | -1.346289 | H | 2.141723  | 3.970184  | 0.705319  |
| C | 5.369094  | -1.437230 | 0.097811  | C | 5.503200  | -1.529637 | 0.080850  | C | 5.397134  | -1.712959 | -0.122767 | H | 2.085073  | 3.205440  | -0.894577 |
| C | 5.151964  | -0.803230 | 1.248313  | C | 5.193594  | -1.146928 | 1.317873  | C | 5.118692  | -1.443323 | 1.150904  | H | 4.090686  | -2.118067 | -1.516022 |
| H | 4.155228  | -2.274031 | -1.463315 | H | 4.417865  | -2.011090 | -1.707983 | H | 4.272048  | -1.958227 | -1.935030 | H | 5.098645  | -0.773476 | -2.032325 |
| H | 5.251181  | -1.007564 | -1.996434 | H | 5.546412  | -0.674378 | -1.881412 | H | 5.465081  | -0.668600 | -1.990131 | H | 6.119899  | -1.892694 | -0.035249 |
| H | 6.192188  | -2.147566 | 0.024540  | H | 6.333663  | -2.217609 | -0.075196 | H | 6.191627  | -2.420206 | -0.359213 | H | 5.670569  | -0.780216 | 2.063586  |
| H | 5.790753  | -0.985935 | 2.106705  | H | 5.765219  | -1.510591 | 2.165953  | H | 5.679796  | -1.918529 | 1.949370  | H | 4.167484  | 0.042537  | 1.357196  |
| H | 4.343111  | -0.086981 | 1.377739  | H | 4.372723  | -0.465311 | 1.531202  | H | 4.334663  | -0.748240 | 1.444380  |   |           |           |           |
| O | -3.345586 | -2.814154 | -0.254688 | O | -6.343445 | -1.673394 | 1.594451  | O | -5.888269 | -2.939750 | 1.339604  |   |           |           |           |
| H | -3.941499 | -2.993076 | 0.500936  | H | -6.005294 | -1.223853 | 2.393172  | H | -5.924539 | -1.972709 | 1.358970  |   |           |           |           |

| H10-Abs                                                                           |                                                                                     |                                                                                     |                                                                                      |   |           |           |           |   |           |           |           |   |           |           |           |
|-----------------------------------------------------------------------------------|-------------------------------------------------------------------------------------|-------------------------------------------------------------------------------------|--------------------------------------------------------------------------------------|---|-----------|-----------|-----------|---|-----------|-----------|-----------|---|-----------|-----------|-----------|
| MCR                                                                               | TS                                                                                  | MCP                                                                                 | RAD                                                                                  |   |           |           |           |   |           |           |           |   |           |           |           |
| 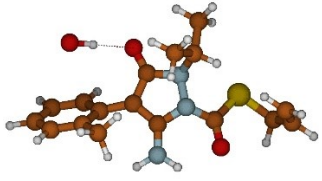 |  |  |  |   |           |           |           |   |           |           |           |   |           |           |           |
| C                                                                                 | -2.660561                                                                           | -0.515283                                                                           | -0.260649                                                                            | C | -0.331928 | 1.298844  | -0.427768 | C | -0.353163 | 1.263189  | -0.363912 | C | -3.531150 | 0.053589  | -1.534804 |
| C                                                                                 | -3.381754                                                                           | -1.096774                                                                           | 0.801368                                                                             | C | -1.028335 | 0.095925  | -0.101377 | C | -1.011898 | 0.053264  | 0.009249  | C | -2.909693 | -0.237625 | -0.308970 |
| C                                                                                 | -4.754117                                                                           | -1.320892                                                                           | 0.629667                                                                             | C | -0.075331 | -0.845107 | 0.239337  | C | -0.027708 | -0.866803 | 0.315246  | C | -3.674305 | -0.696200 | 0.785448  |
| C                                                                                 | -5.412008                                                                           | -0.967144                                                                           | -0.545645                                                                            | N | 1.195835  | -0.257109 | 0.167360  | N | 1.228296  | -0.258891 | 0.175512  | C | -5.057932 | -0.882619 | 0.607341  |
| C                                                                                 | -4.698583                                                                           | -0.372729                                                                           | -1.586876                                                                            | N | 1.065822  | 1.078849  | -0.269253 | N | 1.054458  | 1.068501  | -0.272299 | C | -5.601119 | -0.589171 | -0.619786 |
| C                                                                                 | -3.330919                                                                           | -0.153766                                                                           | -1.441498                                                                            | C | -2.491206 | -0.068424 | -0.158240 | C | -2.472695 | -0.139523 | 0.025210  | C | -4.906615 | -0.116539 | -1.711489 |
| C                                                                                 | -1.222203                                                                           | -0.212301                                                                           | -0.151145                                                                            | C | -3.235323 | -0.489488 | 0.963751  | C | -3.151402 | -0.549408 | 1.193339  | C | -1.458308 | -0.007330 | -0.193305 |
| C                                                                                 | -2.727803                                                                           | -1.459810                                                                           | 2.109368                                                                             | C | -4.627318 | -0.614548 | 0.834983  | C | -4.549247 | -0.704241 | 1.139270  | C | -0.806931 | 1.235297  | -0.454843 |
| H                                                                                 | -5.315323                                                                           | -1.766476                                                                           | 1.447186                                                                             | C | -5.238952 | -0.298064 | -0.365548 | C | -5.186460 | -0.427435 | -0.045405 | N | 0.593352  | 1.073135  | -0.252466 |
| H                                                                                 | -6.478278                                                                           | -1.146181                                                                           | -0.644441                                                                            | C | -4.531130 | 0.134638  | -1.477762 | C | -4.578331 | -0.001506 | -1.205761 | N | 0.768275  | -0.268482 | 0.150633  |

|   |           |           |           |   |           |           |           |   |           |           |           |   |           |           |           |
|---|-----------|-----------|-----------|---|-----------|-----------|-----------|---|-----------|-----------|-----------|---|-----------|-----------|-----------|
| H | -5.199977 | -0.084024 | -2.505376 | C | -3.147728 | 0.246140  | -1.359076 | C | -3.189416 | 0.136531  | -1.151267 | C | -0.476723 | -0.914449 | 0.156470  |
| H | -2.762648 | 0.297682  | -2.250945 | C | -2.591477 | -0.786541 | 2.292883  | C | -2.434315 | -0.806430 | 2.492809  | O | -1.294270 | 2.331884  | -0.759903 |
| H | -1.905791 | -0.778712 | 2.349496  | N | -0.227083 | -2.132649 | 0.540107  | N | -0.144820 | -2.152305 | 0.640207  | N | -0.582613 | -2.215839 | 0.415274  |
| H | -2.318673 | -2.476002 | 2.083709  | C | 2.326728  | -0.980282 | -0.214141 | C | 2.352778  | -0.968910 | -0.246225 | C | 1.944201  | -0.929337 | -0.207042 |
| H | -3.459047 | -1.422809 | 2.920294  | S | 3.455895  | -0.099144 | -1.256826 | S | 3.416345  | -0.087898 | -1.356063 | O | 2.150269  | -2.077678 | 0.141417  |
| C | -0.177145 | -1.079441 | 0.118916  | C | 4.801639  | -1.317376 | -1.270110 | C | 4.784372  | -1.279968 | -1.405857 | C | 1.228473  | 2.028861  | 0.721118  |
| N | 1.021029  | -0.354398 | 0.145475  | C | 5.620885  | -1.416451 | -0.013670 | C | 5.661101  | -1.336030 | -0.186068 | C | 0.400588  | 2.165287  | 1.993371  |
| N | 0.752473  | 0.996611  | -0.159259 | C | 5.421846  | -0.777309 | 1.137243  | C | 5.496796  | -0.682555 | 0.962266  | C | -3.063671 | -0.973546 | 2.134317  |
| C | -0.651692 | 1.078497  | -0.323139 | C | 1.776147  | 2.033283  | 0.652355  | C | 1.792616  | 2.046853  | 0.600871  | S | 3.068050  | 0.027818  | -1.186921 |
| O | -1.212565 | 2.171459  | -0.530232 | C | 2.095324  | 3.331109  | -0.072093 | C | 2.047844  | 3.342441  | -0.152457 | C | 4.463283  | -1.133192 | -1.188459 |
| N | -0.196163 | -2.399272 | 0.275910  | O | -0.779563 | 2.406722  | -0.750678 | O | -0.835340 | 2.359422  | -0.677780 | C | 5.245611  | -1.235283 | 0.091057  |
| H | 0.658223  | -2.918424 | 0.428550  | C | 1.002741  | 2.239213  | 1.949180  | C | 1.084021  | 2.252622  | 1.934268  | C | 4.991144  | -0.629085 | 1.248819  |
| H | -1.064583 | -2.893922 | 0.117338  | O | 2.493975  | -2.127948 | 0.156702  | O | 2.557043  | -2.107085 | 0.135485  | C | 1.521711  | 3.358812  | 0.045496  |
| C | 1.356348  | 1.930691  | 0.855828  | H | -5.216559 | -0.937570 | 1.688975  | O | -8.114391 | -0.421146 | -1.449538 | H | -5.665633 | -1.233362 | 1.437793  |
| C | 0.549574  | 1.947203  | 2.148484  | H | -6.419549 | -0.376626 | -0.430570 | H | -5.092303 | -1.016771 | 2.027586  | H | -5.382874 | 0.109367  | -2.660294 |
| C | 1.562042  | 3.310231  | 0.251404  | H | -5.031945 | 0.377279  | -2.409202 | H | -7.638868 | -0.352952 | -0.609565 | H | -2.922931 | 0.413228  | -2.361106 |
| H | 2.339958  | 1.501501  | 1.061741  | H | -2.558936 | 0.574395  | -2.211479 | H | -5.130878 | 0.211876  | -2.115777 | H | -2.209255 | -0.318264 | 2.327769  |
| H | 1.097570  | 2.512045  | 2.907414  | H | -1.700313 | -0.171947 | 2.450664  | H | -2.645606 | 0.457331  | -2.036250 | H | -2.712002 | -2.008688 | 2.206553  |
| H | 0.393957  | 0.931015  | 2.526362  | H | -2.287977 | -1.836783 | 2.363818  | H | -1.555763 | -0.162847 | 2.596869  | H | -3.805376 | -0.824205 | 2.922343  |
| H | -0.424248 | 2.424753  | 2.002531  | H | -3.296806 | -0.594404 | 3.104628  | H | -2.094811 | -1.845808 | 2.561374  | H | 0.237170  | -2.776434 | 0.605313  |
| H | 0.612663  | 3.816991  | 0.069013  | H | 0.576572  | -2.722619 | 0.709805  | H | -3.104606 | -0.623904 | 3.335817  | H | -1.477510 | -2.666111 | 0.272700  |
| H | 2.145120  | 3.913142  | 0.953239  | H | -1.141823 | -2.551408 | 0.431813  | H | 0.674339  | -2.728828 | 0.778613  | H | 2.183020  | 1.559998  | 0.973423  |
| H | 2.115877  | 3.244081  | -0.689427 | H | 2.719846  | 1.532127  | 0.882760  | H | -1.057837 | -2.584633 | 0.580709  | H | 0.962923  | 2.746117  | 2.729471  |
| C | 2.234337  | -0.912046 | -0.265936 | H | 1.614685  | 2.817394  | 2.646766  | H | 2.757005  | 1.567016  | 0.786497  | H | 0.184544  | 1.183333  | 2.427904  |
| O | 2.517268  | -2.063357 | 0.008704  | H | 0.764069  | 1.279684  | 2.420328  | H | 1.718860  | 2.852615  | 2.591868  | H | -0.544105 | 2.682577  | 1.798396  |
| S | 3.276109  | 0.174639  | -1.197737 | H | 0.072822  | 2.788961  | 1.772910  | H | 0.891482  | 1.294289  | 2.428360  | H | 0.605258  | 3.906221  | -0.182773 |
| C | 4.745316  | -0.887821 | -1.288411 | H | 1.191982  | 3.906367  | -0.283323 | H | 0.134168  | 2.780098  | 1.801049  | H | 2.126912  | 3.967593  | 0.723197  |
| C | 5.553663  | -1.013938 | -0.027509 | H | 2.747413  | 3.934666  | 0.565615  | H | 1.124302  | 3.900214  | -0.318075 | H | 2.085148  | 3.208751  | -0.879939 |
| H | 5.353047  | -0.436244 | -2.079503 | H | 2.618236  | 3.133573  | -1.012256 | H | 2.723768  | 3.963420  | 0.442269  | H | 5.110175  | -0.771614 | -1.994775 |
| C | 5.270141  | -0.511943 | 1.172473  | H | 4.384297  | -2.293160 | -1.534546 | H | 2.521175  | 3.144280  | -1.118427 | H | 4.095951  | -2.117135 | -1.493399 |
| H | 4.438037  | -1.873881 | -1.648084 | H | 5.435372  | -1.005734 | -2.107084 | H | 5.373280  | -0.974762 | -2.277167 | H | 6.106752  | -1.898253 | 0.011537  |
| H | 6.462537  | -1.599694 | -0.162392 | H | 6.456827  | -2.109578 | -0.104007 | H | 4.375195  | -2.269128 | -1.630482 | H | 5.636878  | -0.787941 | 2.106748  |
| H | 5.939455  | -0.678120 | 2.010696  | H | 6.088218  | -0.938544 | 1.978785  | H | 6.509576  | -2.009797 | -0.302206 | H | 4.143667  | 0.039577  | 1.385237  |
| H | 4.375717  | 0.077457  | 1.363864  | H | 4.601594  | -0.077390 | 1.283438  | H | 6.203796  | -0.812850 | 1.775556  |   |           |           |           |
| O | -3.935712 | 2.389365  | -0.436370 | O | -7.718460 | -0.683505 | -0.607718 | H | 4.666547  | -0.000418 | 1.134190  |   |           |           |           |
| H | -2.942456 | 2.304865  | -0.449377 | H | -7.601465 | -1.441533 | -1.212260 | H | -7.427730 | -0.625287 | -2.098529 |   |           |           |           |

| H11-Abs |    |     |     |
|---------|----|-----|-----|
| MCR     | TS | MCP | RAD |

|                                                                                   |                                                                                    |                                                                                     |                                                                                     |
|-----------------------------------------------------------------------------------|------------------------------------------------------------------------------------|-------------------------------------------------------------------------------------|-------------------------------------------------------------------------------------|
| 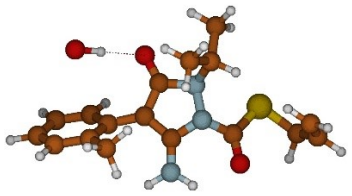 |  |  |  |
| C -2.660460 -0.515456 -0.260705                                                   | C -0.529914 1.206871 0.063578                                                      | C -2.547593 -0.420365 0.101180                                                      | C -0.783435 1.248914 -0.468285                                                      |
| C -3.381806 -1.097156 0.801096                                                    | C -1.118727 -0.093541 0.086813                                                     | C -3.149722 -1.377247 0.946074                                                      | C -1.445232 0.011406 -0.204744                                                      |
| C -4.754182 -1.321069 0.629223                                                    | C -0.082719 -1.008934 0.096752                                                     | C -4.534411 -1.582689 0.865191                                                      | C -0.471524 -0.901862 0.153924                                                      |
| C -5.411914 -0.966906 -0.546060                                                   | N 1.136899 -0.318265 0.115799                                                      | C -5.340403 -0.852775 -0.013575                                                     | N 0.777089 -0.263356 0.154481                                                       |
| C -4.698309 -0.372355 -1.587075                                                   | N 0.887627 1.070598 0.074853                                                       | C -4.697500 0.082150 -0.794929                                                      | N 0.613388 1.077902 -0.253656                                                       |
| C -3.330637 -0.153592 -1.441536                                                   | C -2.566594 -0.357490 0.079206                                                     | C -3.348501 0.332590 -0.783892                                                      | C -2.894836 -0.209013 -0.337407                                                     |
| C -1.222144 -0.212425 -0.150956                                                   | C -3.194440 -1.124337 1.083109                                                     | C -1.102538 -0.143800 0.134638                                                      | C -3.684610 -0.685275 0.730766                                                      |
| C -2.727963 -1.460605 2.109030                                                    | C -4.579775 -1.322689 1.014996                                                     | C -2.350406 -2.168117 1.950663                                                      | C -5.061393 -0.862761 0.533333                                                      |
| H -5.315510 -1.766796 1.446577                                                    | C -5.353179 -0.765112 -0.002431                                                    | H -4.993433 -2.318916 1.520762                                                      | C -5.678700 -0.563803 -0.685133                                                     |
| H -6.478196 -1.145769 -0.645048                                                   | C -4.706437 -0.004127 -0.966124                                                    | H -6.412640 -1.016692 -0.057365                                                     | C -4.859031 -0.082193 -1.682272                                                     |
| H -5.199542 -0.083309 -2.505540                                                   | C -3.341796 0.216304 -0.945082                                                     | H -5.995320 1.122996 -2.929920                                                      | C -3.504719 0.107672 -1.570348                                                      |
| H -2.762210 0.297944 -2.250841                                                    | C -2.422347 -1.712954 2.235526                                                     | H -2.889815 1.073661 -1.433255                                                      | C -3.094839 -0.988453 2.085096                                                      |
| H -1.906233 -0.779331 2.349626                                                    | N -0.127521 -2.337430 0.037017                                                     | H -1.486611 -1.601497 2.310570                                                      | N -0.585894 -2.201997 0.412874                                                      |
| H -2.318462 -2.476632 2.082920                                                    | C 2.284442 -0.816023 -0.501516                                                     | H -1.976994 -3.103782 1.520319                                                      | C 1.950550 -0.932786 -0.197840                                                      |
| H -3.459363 -1.424264 2.919845                                                    | S 3.279230 0.401971 -1.317641                                                      | H -2.975912 -2.429726 2.807329                                                      | S 3.082709 0.014625 -1.177129                                                       |
| C -0.177026 -1.079470 0.119113                                                    | C 4.701949 -0.651688 -1.718472                                                     | C -0.057406 -1.030695 -0.044806                                                     | C 4.467877 -1.158474 -1.177814                                                      |
| N 1.021068 -0.354359 0.145642                                                     | C 5.605790 -1.012360 -0.572821                                                     | N 1.155941 -0.338117 0.076544                                                       | C 5.250414 -1.265240 0.101163                                                       |
| N 0.752429 0.996631 -0.159075                                                     | C 5.440974 -0.719230 0.715382                                                      | N 0.891019 1.030722 0.296954                                                        | C 5.000940 -0.656286 1.258559                                                       |
| C -0.651751 1.078430 -0.322888                                                    | C 1.600618 1.792809 1.186943                                                       | C -0.527504 1.147047 0.338794                                                       | C 1.249254 2.033263 0.719691                                                        |
| O -1.212782 2.171317 -0.529941                                                    | C 1.774376 3.262772 0.840405                                                       | O -1.081419 2.228303 0.574444                                                       | C 1.556182 3.358087 0.040179                                                        |
| N -0.196090 -2.399264 0.276896                                                    | O -1.073292 2.318683 0.084391                                                      | N -0.089004 -2.326000 -0.347396                                                     | O -1.260921 2.346923 -0.782064                                                      |
| H 0.658787 -2.918514 0.426580                                                     | C 0.918488 1.566104 2.530757                                                       | H 0.766267 -2.840480 -0.510758                                                      | C 0.413876 2.181116 1.985714                                                        |
| H -1.064065 -2.894033 0.116176                                                    | O 2.551891 -2.003498 -0.465867                                                     | H -0.980305 -2.750640 -0.569190                                                     | O 2.147990 -2.081312 0.154422                                                       |
| C 1.356302 1.930743 0.855962                                                      | H -5.063847 -1.910266 1.790974                                                     | C 1.621378 1.546372 1.507924                                                        | H -5.666490 -1.226707 1.360381                                                      |
| C 0.549525 1.947228 2.148614                                                      | H -6.427105 -0.918385 -0.031266                                                    | C 0.972227 1.065789 2.800336                                                        | H -6.747726 -0.698518 -0.818115                                                     |
| C 1.561857 3.310287 0.251506                                                      | H -5.342417 0.464701 -1.850744                                                     | C 1.769687 3.057619 1.434764                                                        | H -2.899347 0.478442 -2.393364                                                      |
| H 2.339950 1.501627 1.061852                                                      | H -2.859501 0.813381 -1.713810                                                     | H 2.617550 1.103649 1.429429                                                        | H -2.227374 -0.356162 2.295644                                                      |
| H 1.097488 2.512112 2.907535                                                      | H -1.563451 -1.089744 2.501339                                                     | H 1.611032 1.333255 3.646375                                                        | H -2.770262 -2.032502 2.156338                                                      |
| H 0.393953 0.931038 2.526506                                                      | H -2.044471 -2.712587 1.994315                                                     | H 0.849153 -0.022531 2.797333                                                       | H -3.841231 -0.825632 2.866173                                                      |

|   |           |           |           |   |           |           |           |   |           |           |           |   |           |           |           |
|---|-----------|-----------|-----------|---|-----------|-----------|-----------|---|-----------|-----------|-----------|---|-----------|-----------|-----------|
| H | -0.424323 | 2.424719  | 2.002638  | H | -3.068154 | -1.810112 | 3.111225  | H | -0.006334 | 1.533017  | 2.949568  | H | 0.230537  | -2.766106 | 0.607525  |
| H | 0.612431  | 3.816948  | 0.069074  | H | 0.722595  | -2.883703 | -0.007311 | H | 0.811406  | 3.562777  | 1.569246  | H | -1.480569 | -2.649582 | 0.260946  |
| H | 2.144851  | 3.913267  | 0.953351  | H | -1.020772 | -2.785448 | -0.122024 | H | 2.444072  | 3.379871  | 2.233198  | H | 2.198717  | 1.558440  | 0.980053  |
| H | 2.115732  | 3.244179  | -0.689305 | H | 2.591702  | 1.332921  | 1.214141  | H | 2.199828  | 3.361159  | 0.476037  | H | 0.975917  | 2.759667  | 2.723810  |
| C | 2.234395  | -0.911918 | -0.265916 | H | 1.543788  | 1.979344  | 3.326786  | C | 2.289099  | -0.693845 | -0.655702 | H | 0.186244  | 1.202515  | 2.421927  |
| O | 2.517328  | -2.063290 | 0.008486  | H | 0.780648  | 0.497302  | 2.726457  | O | 2.568714  | -1.862589 | -0.852307 | H | -0.524903 | 2.705803  | 1.782181  |
| S | 3.276062  | 0.174925  | -1.197607 | H | -0.056450 | 2.062264  | 2.569194  | S | 3.247248  | 0.670920  | -1.254143 | H | 0.644957  | 3.910736  | -0.196302 |
| C | 4.745237  | -0.887553 | -1.288669 | H | 0.822948  | 3.797334  | 0.862339  | C | 4.661048  | -0.267676 | -1.898380 | H | 2.161148  | 3.965630  | 0.719183  |
| C | 5.553684  | -1.013982 | -0.027860 | H | 2.441618  | 3.717036  | 1.578373  | C | 5.610890  | -0.825890 | -0.875776 | H | 2.124489  | 3.200098  | -0.880931 |
| C | 5.270266  | -0.512244 | 1.172255  | H | 2.224619  | 3.379162  | -0.149586 | C | 5.489268  | -0.790143 | 0.449527  | H | 4.091399  | -2.139601 | -1.480776 |
| H | 4.437883  | -1.873511 | -1.648553 | H | 4.337600  | -1.553382 | -2.218853 | H | 4.283354  | -1.064052 | -2.545993 | H | 5.117022  | -0.804069 | -1.985478 |
| H | 5.352902  | -0.435782 | -2.079700 | H | 5.257486  | -0.075951 | -2.466115 | H | 5.182876  | 0.446176  | -2.544320 | H | 6.106555  | -1.934635 | 0.021596  |
| H | 6.462542  | -1.599715 | -0.162947 | H | 6.478749  | -1.585436 | -0.884141 | H | 6.477982  | -1.312591 | -1.321457 | H | 5.645845  | -0.819141 | 2.116356  |
| H | 5.939644  | -0.678620 | 2.010387  | H | 6.170663  | -1.042726 | 1.451001  | H | 6.248345  | -1.236144 | 1.084446  | H | 4.158457  | 0.018722  | 1.394671  |
| H | 4.375870  | 0.077134  | 1.363849  | H | 4.587482  | -0.152868 | 1.082449  | H | 4.643134  | -0.320191 | 0.946661  |   |           |           |           |
| O | -3.935889 | 2.389602  | -0.435916 | O | -6.071860 | 1.229915  | -2.680842 | O | -6.306191 | 2.025252  | -2.774049 |   |           |           |           |
| H | -2.942665 | 2.304672  | -0.449350 | H | -6.098604 | 2.042244  | -2.139768 | H | -6.073821 | 2.202047  | -1.852321 |   |           |           |           |

| H12-Abs                                                                            |          |           |                                                                                     |   |           |                                                                                      |           |   |                                                                                      |           |           |   |           |           |           |
|------------------------------------------------------------------------------------|----------|-----------|-------------------------------------------------------------------------------------|---|-----------|--------------------------------------------------------------------------------------|-----------|---|--------------------------------------------------------------------------------------|-----------|-----------|---|-----------|-----------|-----------|
| MCR                                                                                |          |           | TS                                                                                  |   |           | MCP                                                                                  |           |   | RAD                                                                                  |           |           |   |           |           |           |
| 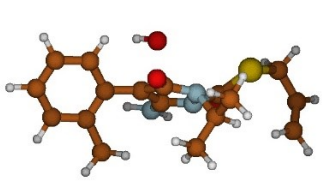 |          |           |  |   |           |  |           |   |  |           |           |   |           |           |           |
| C                                                                                  | 2.832352 | -0.247888 | 0.194439                                                                            | C | -0.681852 | 1.233344                                                                             | -0.036498 | C | -0.725410                                                                            | 1.253658  | -0.138234 | C | -3.549770 | 0.220791  | -1.434638 |
| C                                                                                  | 3.521735 | -0.535498 | -1.002950                                                                           | C | -1.317102 | -0.043505                                                                            | 0.038894  | C | -1.379521                                                                            | 0.000491  | 0.065016  | C | -2.879722 | -0.198762 | -0.296534 |
| C                                                                                  | 4.913595 | -0.679375 | -0.944749                                                                           | C | -0.320519 | -0.987784                                                                            | 0.194916  | C | -0.394775                                                                            | -0.939080 | 0.304207  | C | -3.675098 | -0.769738 | 0.726406  |
| C                                                                                  | 5.616814 | -0.523992 | 0.246618                                                                            | N | 0.920245  | -0.336697                                                                            | 0.242623  | N | 0.852801                                                                             | -0.297815 | 0.317451  | C | -5.053461 | -0.905436 | 0.504942  |
| C                                                                                  | 4.932145 | -0.203015 | 1.419087                                                                            | N | 0.725017  | 1.051420                                                                             | 0.074588  | N | 0.675196                                                                             | 1.071624  | 0.026207  | C | -5.663077 | -0.477729 | -0.672328 |
| C                                                                                  | 3.548855 | -0.065977 | 1.388176                                                                            | C | -2.768565 | -0.262920                                                                            | -0.060616 | C | -2.829708                                                                            | -0.206206 | -0.060797 | C | -4.895358 | 0.118248  | -1.684177 |
| C                                                                                  | 1.372147 | -0.057215 | 0.214038                                                                            | C | -3.513895 | -0.893581                                                                            | 0.960306  | C | -3.623830                                                                            | -0.825921 | 0.933695  | C | -1.428405 | 0.009131  | -0.179658 |
| C                                                                                  | 2.828112 | -0.654424 | -2.336690                                                                           | C | -4.895874 | -1.043691                                                                            | 0.786343  | C | -5.001635                                                                            | -0.955124 | 0.705317  | C | -0.773083 | 1.255134  | -0.419369 |



|   |           |           |           |   |           |           |           |   |           |           |           |   |           |           |           |
|---|-----------|-----------|-----------|---|-----------|-----------|-----------|---|-----------|-----------|-----------|---|-----------|-----------|-----------|
| H | 5.451654  | -0.900506 | -1.862923 | C | -5.551237 | -0.576101 | -0.349596 | C | -5.611689 | -0.476249 | -0.452026 | N | 0.625609  | 1.082364  | -0.224268 |
| H | 6.696333  | -0.639212 | 0.256561  | C | -4.826466 | 0.064688  | -1.359314 | C | -4.845446 | 0.164830  | -1.437193 | N | 0.797658  | -0.269841 | 0.142174  |
| H | 5.469967  | -0.063819 | 2.351433  | C | -3.462489 | 0.203336  | -1.179145 | C | -3.501059 | 0.259396  | -1.180178 | C | -0.448003 | -0.914194 | 0.132533  |
| H | 3.003978  | 0.175473  | 2.295718  | C | -2.858674 | -1.390801 | 2.222364  | C | -3.027872 | -1.323518 | 2.224698  | O | -1.257756 | 2.357979  | -0.702118 |
| H | 1.963390  | 0.012593  | -2.407137 | N | -0.411741 | -2.314087 | 0.241593  | N | -0.497579 | -2.258338 | 0.448027  | N | -0.552276 | -2.224205 | 0.343909  |
| H | 2.477598  | -1.675682 | -2.519780 | C | 2.079890  | -0.918502 | -0.273629 | C | 2.014067  | -0.929470 | -0.133004 | C | 1.973011  | -0.922717 | -0.234220 |
| H | 3.523209  | -0.399354 | -3.139763 | S | 3.144583  | 0.195288  | -1.147095 | S | 3.106706  | 0.104317  | -1.068579 | O | 2.178165  | -2.079450 | 0.085583  |
| C | 0.379479  | -0.891138 | -0.333862 | C | 4.549147  | -0.927684 | -1.395162 | C | 4.499842  | -1.051483 | -1.209316 | C | 1.269413  | 2.013844  | 0.767039  |
| N | -0.838012 | -0.218375 | -0.299272 | C | 5.395281  | -1.211878 | -0.185663 | C | 5.324845  | -1.253243 | 0.030877  | C | 0.444711  | 2.130606  | 2.043221  |
| N | -0.656050 | 1.075560  | 0.239174  | C | 5.186623  | -0.805084 | 1.064718  | C | 5.101350  | -0.753577 | 1.244462  | C | -3.084500 | -1.206070 | 2.042041  |
| C | 0.720284  | 1.201547  | 0.521018  | C | 1.404037  | 1.840239  | 1.161558  | C | 1.337104  | 1.950204  | 1.052713  | S | 3.095965  | 0.056418  | -1.192381 |
| O | 1.228834  | 2.245797  | 0.918775  | C | 1.656979  | 3.267134  | 0.702182  | C | 1.619923  | 3.325229  | 0.469330  | C | 4.487851  | -1.108323 | -1.229044 |
| N | 0.493093  | -2.135982 | -0.744455 | O | -1.187444 | 2.358839  | -0.128158 | O | -1.213451 | 2.366296  | -0.373517 | C | 5.275415  | -1.244118 | 0.044047  |
| H | -0.313935 | -2.657604 | -1.065353 | C | 0.638810  | 1.754217  | 2.476859  | C | 0.536531  | 1.996713  | 2.348670  | C | 5.025157  | -0.669034 | 1.218421  |
| H | 1.389733  | -2.600323 | -0.652889 | O | 2.307503  | -2.104748 | -0.121347 | O | 2.227171  | -2.102413 | 0.113995  | C | 1.569148  | 3.354826  | 0.116711  |
| C | -1.276170 | 2.141069  | -0.622061 | H | -5.468143 | -1.529050 | 1.572554  | O | -0.770635 | 0.319271  | -3.147528 | H | -5.662451 | -1.343250 | 1.291362  |
| C | -0.425616 | 2.426694  | -1.853604 | H | -6.624537 | -0.704480 | -0.451539 | H | -5.609939 | -1.430679 | 1.470000  | H | -6.735035 | -0.593557 | -0.803615 |
| C | -1.575693 | 3.379503  | 0.207200  | H | -5.314449 | 0.436616  | -2.254265 | H | -6.683161 | -0.589093 | -0.589310 | H | -5.347224 | 0.471577  | -2.605739 |
| H | -2.226181 | 1.705135  | -0.942103 | H | -2.839618 | 0.740327  | -2.042503 | H | -5.296583 | 0.555566  | -2.343774 | H | -2.202718 | -0.612886 | 2.301540  |
| H | -0.971687 | 3.099383  | -2.520333 | H | -2.006475 | -0.764914 | 2.503328  | H | -0.865083 | 0.343255  | -4.108978 | H | -2.781600 | -2.258596 | 2.013950  |
| H | -0.208795 | 1.504420  | -2.402813 | H | -2.491471 | -2.416043 | 2.101212  | H | -2.149939 | -0.737194 | 2.511518  | H | -3.824182 | -1.099071 | 2.839065  |
| H | 0.518367  | 2.908135  | -1.580041 | H | -3.577513 | -1.394335 | 3.044927  | H | -2.716267 | -2.370635 | 2.142437  | H | 0.272843  | -2.789639 | 0.494197  |
| H | -0.660148 | 3.890998  | 0.510312  | H | 0.417231  | -2.890180 | 0.304511  | H | -3.766300 | -1.263374 | 3.027719  | H | -1.439573 | -2.675465 | 0.163027  |
| H | -2.169657 | 4.068342  | -0.399818 | H | -1.311242 | -2.745165 | 0.070930  | H | 0.330054  | -2.832426 | 0.542230  | H | 2.221391  | 1.533813  | 1.007462  |
| H | -2.151339 | 3.120752  | 1.100342  | H | 2.372306  | 1.348532  | 1.286304  | H | -1.389745 | -2.698454 | 0.263218  | H | 1.014228  | 2.688608  | 2.791315  |
| C | -2.023079 | -0.906772 | 0.014188  | H | 1.235049  | 2.209953  | 3.271940  | H | 2.294709  | 1.460387  | 1.247638  | H | 0.217869  | 1.141548  | 2.455695  |
| O | -2.229115 | -2.016204 | -0.435865 | H | 0.445719  | 0.711459  | 2.750694  | H | 1.116626  | 2.520086  | 3.113459  | H | -0.494284 | 2.662599  | 1.860895  |
| S | -3.125344 | -0.033984 | 1.084356  | H | -0.315134 | 2.287343  | 2.415732  | H | 0.322366  | 0.986784  | 2.714621  | H | 0.655040  | 3.910324  | -0.101335 |
| C | -4.530465 | -1.180612 | 0.997525  | H | 0.727723  | 3.832918  | 0.613801  | H | -0.408617 | 2.531277  | 2.210190  | H | 2.176647  | 3.948080  | 0.805993  |
| C | -5.325481 | -1.161596 | -0.278007 | H | 2.293160  | 3.762743  | 1.440969  | H | 0.700052  | 3.888935  | 0.302627  | H | 2.132174  | 3.219650  | -0.811260 |
| C | -5.067245 | -0.469916 | -1.385846 | H | 2.173723  | 3.279399  | -0.261775 | H | 2.241675  | 3.882057  | 1.176069  | H | 4.115521  | -2.083172 | -1.556378 |
| H | -4.167768 | -2.190315 | 1.210118  | H | 4.177419  | -1.859279 | -1.831025 | H | 2.161949  | 3.242149  | -0.477058 | H | 5.132163  | -0.729007 | -2.029202 |
| H | -5.165338 | -0.886952 | 1.840007  | H | 5.151418  | -0.434945 | -2.165627 | H | 4.120473  | -2.008742 | -1.577984 | H | 6.136103  | -1.904783 | -0.056530 |
| H | -6.199091 | -1.811905 | -0.243556 | H | 6.262957  | -1.831755 | -0.409855 | H | 5.119802  | -0.627279 | -2.006123 | H | 5.673866  | -0.850497 | 2.069587  |
| H | -5.723039 | -0.546031 | -2.247432 | H | 5.875688  | -1.082367 | 1.856234  | H | 6.189388  | -1.895905 | -0.133255 | H | 4.178188  | -0.004185 | 1.375283  |
| H | -4.208192 | 0.191654  | -1.476525 | H | 4.335616  | -0.187515 | 1.344610  | H | 5.775297  | -0.977922 | 2.065244  |   |           |           |           |
| O | 0.592157  | -0.823002 | 2.180307  | O | -2.052953 | 1.115268  | -3.059147 | H | 4.252323  | -0.109532 | 1.464225  |   |           |           |           |
| H | 1.297618  | -1.490950 | 2.205314  | H | -1.288800 | 0.538248  | -2.861152 | H | -1.560287 | 0.768251  | -2.812284 |   |           |           |           |

| H13-Abs |    |     |     |
|---------|----|-----|-----|
| MCR     | TS | MCP | RAD |

|                                                                                   |                                                                                    |                                                                                     |                                                                                     |
|-----------------------------------------------------------------------------------|------------------------------------------------------------------------------------|-------------------------------------------------------------------------------------|-------------------------------------------------------------------------------------|
| 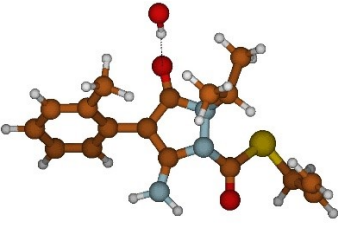 |  |  |  |
| C -2.692997 -0.872891 -0.112973                                                   | C -0.689427 0.757713 -0.737226                                                     | C -2.618349 -0.706635 0.086500                                                      | C -0.809872 1.006694 -0.663347                                                      |
| C -3.729769 -0.081113 0.421077                                                    | C -1.227695 -0.414402 -0.144301                                                    | C -3.590684 0.041509 0.825362                                                       | C -1.425043 -0.135085 -0.066796                                                     |
| C -5.043327 -0.561102 0.339799                                                    | C -0.171520 -1.096798 0.432478                                                     | C -4.953325 -0.353693 0.716765                                                      | C -0.414832 -0.889214 0.500203                                                      |
| C -5.338510 -1.792740 -0.238644                                                   | N 1.006655 -0.369259 0.231795                                                      | C -5.331966 -1.443983 -0.048281                                                     | N 0.812153 -0.243337 0.295078                                                       |
| C -4.308611 -2.579164 -0.755606                                                   | N 0.714954 0.788211 -0.521124                                                      | C -4.365835 -2.187653 -0.738400                                                     | N 0.597225 0.927643 -0.462549                                                       |
| C -2.998587 -2.114474 -0.694265                                                   | C -2.644168 -0.835414 -0.152509                                                    | C -3.023614 -1.807582 -0.668199                                                     | C -2.858123 -0.475557 -0.105637                                                     |
| C -1.283112 -0.436650 -0.070703                                                   | C -3.616925 -0.129731 0.588157                                                     | C -1.199598 -0.307546 0.091752                                                      | C -3.840091 0.411267 0.443388                                                       |
| C -3.475154 1.250546 1.078347                                                     | C -4.949864 -0.560543 0.529012                                                     | C -3.241078 1.140557 1.638346                                                       | C -5.208551 0.039225 0.326758                                                       |
| H -5.845725 0.045108 0.753098                                                     | C -5.318500 -1.673570 -0.221351                                                    | H -5.700581 0.219383 1.259194                                                       | C -5.587679 -1.156124 -0.258749                                                     |
| H -6.366739 -2.138830 -0.281341                                                   | C -4.350278 -2.383126 -0.932489                                                    | H -6.379343 -1.723097 -0.109924                                                     | C -4.615353 -2.029731 -0.762642                                                     |
| H -4.523483 -3.541480 -1.209481                                                   | C -3.023244 -1.960093 -0.896674                                                    | H -4.656330 -3.044104 -1.337838                                                     | C -3.266229 -1.676284 -0.688129                                                     |
| H -2.193770 -2.712501 -1.115506                                                   | C -3.260533 1.044413 1.434826                                                      | H -2.275625 -2.363949 -1.228080                                                     | C -3.493340 1.605383 1.110181                                                       |
| H -3.601110 2.068573 0.359513                                                     | N -0.175262 -2.265795 1.066445                                                     | H -4.355345 1.062551 -1.530678                                                      | N -0.486179 -2.058290 1.133144                                                      |
| H -2.462489 1.316375 1.484879                                                     | C 2.247174 -0.989830 0.072631                                                      | H -2.209304 1.435526 1.784720                                                       | C 1.998151 -0.957353 0.110362                                                       |
| H -4.189105 1.414541 1.889609                                                     | S 3.306833 -0.235263 -1.129108                                                     | H -4.013916 1.690245 2.163485                                                       | S 3.075805 -0.304292 -1.134909                                                      |
| C -0.219881 -1.144808 0.466716                                                    | C 4.808445 -1.199094 -0.794838                                                     | C -0.124388 -1.071103 0.509245                                                      | C 4.493505 -1.401895 -0.851716                                                      |
| N 0.959094 -0.415432 0.276180                                                     | C 5.549562 -0.858614 0.467802                                                      | N 1.055796 -0.339940 0.324036                                                       | C 5.322847 -1.117825 0.369159                                                       |
| N 0.660844 0.773784 -0.421831                                                     | C 5.187289 0.003713 1.415245                                                       | N 0.741538 0.901576 -0.268937                                                       | C 5.094767 -0.205675 1.311784                                                       |
| C -0.745077 0.756943 -0.620111                                                    | C 1.240882 2.032841 0.145343                                                       | C -0.672204 0.924882 -0.386751                                                      | C 1.246739 2.129492 0.166147                                                        |
| O -1.329225 1.695748 -1.193022                                                    | C 1.409371 3.148559 -0.873268                                                      | O -1.266529 1.924156 -0.827619                                                      | C 1.519590 3.191762 -0.886561                                                       |
| N -0.213423 -2.334829 1.058591                                                    | O -1.263886 1.677537 -1.347383                                                     | N -0.109831 -2.309891 0.993846                                                      | O -1.325740 1.965286 -1.254331                                                      |
| H 0.646623 -2.744127 1.398230                                                     | C 0.381765 2.434287 1.338526                                                       | H 0.759675 -2.763920 1.238570                                                       | C 0.443474 2.649865 1.352123                                                        |
| H -1.073245 -2.866913 1.093321                                                    | O 2.542316 -1.974916 0.723704                                                      | H -0.974026 -2.836108 1.004114                                                      | O 2.238884 -1.953226 0.767661                                                       |
| C 1.222999 1.981488 0.279778                                                      | H -5.701222 -0.016546 1.095563                                                     | C 1.370713 2.056709 0.461674                                                        | H -5.960522 0.713650 0.727647                                                       |
| C 0.423455 2.325322 1.529950                                                      | H -6.356474 -1.990600 -0.245472                                                    | C 0.608423 2.400727 1.735303                                                        | H -6.639678 -1.416274 -0.325050                                                     |
| C 1.361432 3.146738 -0.687194                                                     | H -4.626021 -3.256059 -1.515649                                                    | C 1.542171 3.241941 -0.474704                                                       | H -4.905072 -2.968608 -1.223035                                                     |
| H 2.227460 1.672034 0.579657                                                      | H -2.263832 -2.500103 -1.456403                                                    | H 2.364288 1.693708 0.735299                                                        | H -2.513028 -2.339828 -1.106512                                                     |
| H 0.954213 3.095760 2.096096                                                      | H -3.319256 2.012921 0.812372                                                      | H 1.191643 3.115438 2.322214                                                        | H -2.460833 1.889480 1.271914                                                       |
| H 0.305115 1.448265 2.175156                                                      | H -2.240362 1.008048 1.822795                                                      | H 0.445049 1.507997 2.348717                                                        | H -4.271874 2.248950 1.503834                                                       |

|   |           |           |           |   |           |           |           |   |           |           |           |   |           |           |           |
|---|-----------|-----------|-----------|---|-----------|-----------|-----------|---|-----------|-----------|-----------|---|-----------|-----------|-----------|
| H | -0.566848 | 2.713192  | 1.272482  | H | -3.978263 | 1.205801  | 2.242202  | H | -0.359477 | 2.857002  | 1.505313  | H | 0.346648  | -2.512151 | 1.483242  |
| H | 0.390654  | 3.561477  | -0.968415 | H | 0.683185  | -2.674203 | 1.411408  | H | 0.580213  | 3.677327  | -0.751804 | H | -1.373981 | -2.541866 | 1.164609  |
| H | 1.939820  | 3.935124  | -0.197338 | H | -1.030285 | -2.807236 | 1.075132  | H | 2.131769  | 4.007997  | 0.036892  | H | 2.207877  | 1.757455  | 0.530124  |
| H | 1.891760  | 2.841460  | -1.593736 | H | 2.232671  | 1.746864  | 0.504552  | H | 2.073534  | 2.946382  | -1.383820 | H | 1.032111  | 3.401268  | 1.885430  |
| C | 2.189117  | -1.040621 | 0.054009  | H | 0.876888  | 3.242841  | 1.883155  | C | 2.263492  | -0.961498 | -0.005791 | H | 0.207658  | 1.840838  | 2.052018  |
| O | 2.493318  | -2.054677 | 0.653846  | H | 0.245705  | 1.593010  | 2.026606  | O | 2.580629  | -2.020699 | 0.502759  | H | -0.489205 | 3.117687  | 1.021827  |
| S | 3.219167  | -0.246702 | -1.148267 | H | -0.602005 | 2.791131  | 1.014863  | S | 3.247464  | -0.094500 | -1.195479 | H | 0.593411  | 3.630587  | -1.262546 |
| C | 4.714531  | -1.249119 | -0.915752 | H | 0.444492  | 3.522256  | -1.221533 | C | 4.735849  | -1.130592 | -1.111562 | H | 2.118818  | 3.986914  | -0.433908 |
| C | 5.506158  | -0.985584 | 0.334579  | H | 1.947472  | 3.973855  | -0.398461 | C | 5.592677  | -0.967643 | 0.112685  | H | 2.080129  | 2.771977  | -1.726692 |
| C | 5.190914  | -0.170254 | 1.338723  | H | 1.990728  | 2.806892  | -1.734388 | C | 5.336489  | -0.229176 | 1.190380  | H | 4.134973  | -2.434965 | -0.840445 |
| H | 4.438548  | -2.305497 | -0.980589 | H | 4.551208  | -2.261886 | -0.814845 | H | 4.438374  | -2.175744 | -1.235928 | H | 5.104164  | -1.287735 | -1.753297 |
| H | 5.323610  | -1.025522 | -1.797888 | H | 5.445199  | -1.009910 | -1.665357 | H | 5.303517  | -0.853339 | -2.005979 | H | 6.197015  | -1.763481 | 0.448703  |
| H | 6.431639  | -1.558913 | 0.380204  | H | 6.480504  | -1.414305 | 0.576928  | H | 6.512696  | -1.549762 | 0.068157  | H | 5.774504  | -0.100229 | 2.151456  |
| H | 5.851281  | -0.070396 | 2.194371  | H | 5.814659  | 0.158216  | 2.287449  | H | 6.039100  | -0.199322 | 2.017240  | H | 4.236694  | 0.462729  | 1.283699  |
| H | 4.278716  | 0.422838  | 1.347226  | H | 4.267959  | 0.583164  | 1.360030  | H | 4.432296  | 0.367965  | 1.289217  |   |           |           |           |
| O | -2.167728 | 4.152963  | -0.310554 | O | -3.218760 | 3.208466  | -0.105350 | O | -3.829162 | 1.733443  | -1.986861 |   |           |           |           |
| H | -1.821579 | 3.264648  | -0.586403 | H | -2.508074 | 2.767382  | -0.630988 | H | -2.972293 | 1.747094  | -1.516191 |   |           |           |           |

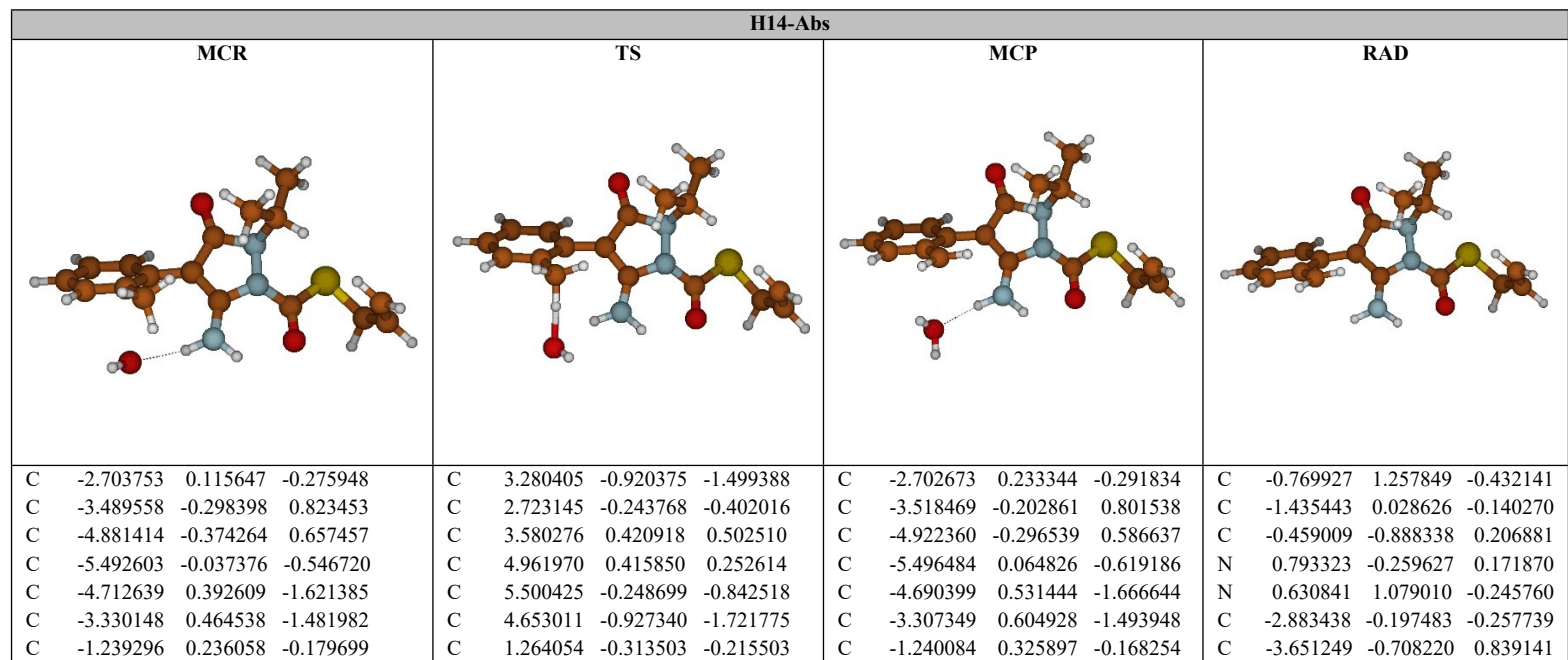

|   |           |           |           |   |           |           |           |   |           |           |           |   |           |           |           |
|---|-----------|-----------|-----------|---|-----------|-----------|-----------|---|-----------|-----------|-----------|---|-----------|-----------|-----------|
| C | -2.884246 | -0.620698 | 2.164984  | C | 0.521490  | -1.535007 | -0.211557 | C | -2.983303 | -0.525206 | 2.067654  | C | -5.039520 | -0.940641 | 0.625441  |
| H | -5.488972 | -0.691243 | 1.501619  | N | -0.859623 | -1.236022 | -0.048028 | H | -5.545083 | -0.647947 | 1.405349  | C | -5.648038 | -0.635666 | -0.578679 |
| H | -6.572014 | -0.101511 | -0.643560 | N | -0.935141 | 0.168287  | 0.062458  | H | -6.571536 | -0.009496 | -0.751107 | C | -4.893323 | -0.092150 | -1.627784 |
| H | -5.177689 | 0.664294  | -2.563905 | O | 0.351106  | 0.715825  | -0.063777 | H | -5.134383 | 0.820916  | -2.613542 | C | -3.523340 | 0.113021  | -1.459134 |
| H | -2.715109 | 0.786838  | -2.317896 | C | 0.925845  | -2.702990 | -0.275765 | H | -2.678055 | 0.942948  | -2.313045 | C | -3.091329 | -0.947617 | 2.112277  |
| H | -2.000996 | -0.005506 | 2.362101  | N | 0.530421  | 2.032747  | -0.102333 | H | -1.931035 | -0.401986 | 2.293427  | N | -0.577227 | -2.184908 | 0.480253  |
| H | -2.574400 | -1.670256 | 2.223804  | C | -2.073112 | 0.819098  | -0.414321 | H | -3.717489 | -2.930311 | 0.856449  | C | 1.955798  | -0.940625 | -0.192001 |
| H | -3.614605 | -0.448978 | 2.959092  | O | -2.201451 | 2.025004  | -0.306111 | H | -3.641139 | -0.862451 | 2.860814  | S | 3.079846  | -0.009483 | -1.196447 |
| C | -0.322516 | -0.735330 | 0.181923  | C | -1.542505 | -1.918708 | 1.106610  | C | -0.346256 | -0.681920 | 0.156609  | C | 4.457781  | -1.191003 | -1.205153 |
| N | 0.965238  | -0.177756 | 0.158759  | C | -0.709565 | -1.835126 | 2.380067  | N | 0.954175  | -0.153441 | 0.148314  | C | 5.257181  | -1.290412 | 0.063933  |
| N | 0.884300  | 1.165780  | -0.266303 | C | 3.074283  | 1.135871  | 1.707946  | N | 0.905758  | 1.206263  | -0.227909 | C | 5.025076  | -0.671505 | 1.219682  |
| C | -0.501918 | 1.422746  | -0.469596 | S | -3.274266 | -0.241633 | -1.172487 | C | -0.474819 | 1.502677  | -0.419977 | C | 1.289091  | 2.037451  | 0.710224  |
| O | -0.908827 | 2.546265  | -0.794659 | C | -4.591891 | 0.984853  | -1.407125 | O | -0.854192 | 2.645793  | -0.709123 | C | 1.589454  | 3.356660  | 0.017065  |
| N | -0.518634 | -2.021198 | 0.457657  | C | -5.347462 | 1.394831  | -0.173945 | N | -0.570629 | -1.970304 | 0.388075  | O | -1.244410 | 2.356451  | -0.748142 |
| H | 0.266047  | -2.627092 | 0.657064  | C | -5.108516 | 1.029073  | 1.083715  | H | 0.201304  | -2.590041 | 0.594705  | C | 0.477644  | 2.197287  | 1.990242  |
| H | -1.444385 | -2.415374 | 0.304755  | C | -1.927490 | -3.340513 | 0.730822  | H | -1.513413 | -2.350375 | 0.279825  | O | 2.150706  | -2.087573 | 0.167024  |
| C | 1.584008  | 2.089855  | 0.693475  | H | 5.617102  | 0.934404  | 0.948121  | C | 1.623460  | 2.076190  | 0.769015  | H | -5.624260 | -1.346976 | 1.446418  |
| C | 0.770883  | 2.296071  | 1.965815  | H | 6.573172  | -0.243869 | -1.008251 | C | 0.812520  | 2.249559  | 2.047671  | H | -6.711259 | -0.813107 | -0.708196 |
| C | 1.960447  | 3.389764  | 0.000909  | H | 5.059689  | -1.453502 | -2.579730 | C | 2.029419  | 3.394655  | 0.130345  | H | -5.365797 | 0.154078  | -2.573120 |
| H | 2.507003  | 1.562794  | 0.948854  | H | 2.617323  | -1.437586 | -2.187206 | H | 2.534825  | 1.520138  | 1.003823  | H | -2.931210 | 0.508275  | -2.280280 |
| H | 1.370818  | 2.850964  | 2.692183  | H | 2.093708  | 0.797476  | 2.049902  | H | 1.423996  | 2.758806  | 2.797440  | H | -2.061292 | -0.702313 | 2.341306  |
| H | 0.494795  | 1.336042  | 2.414988  | H | 2.962658  | 2.243654  | 1.438188  | H | 0.510725  | 1.279142  | 2.456327  | H | -3.712155 | -1.343630 | 2.907741  |
| H | -0.140028 | 2.868957  | 1.765348  | H | 3.795155  | 1.124847  | 2.528064  | H | -0.083254 | 2.852799  | 1.869108  | H | 0.233696  | -2.749023 | 0.695300  |
| H | 1.080469  | 3.993503  | -0.228643 | H | -0.242382 | 2.657294  | 0.085960  | H | 1.164026  | 4.028684  | -0.071168 | H | -1.488653 | -2.617785 | 0.405332  |
| H | 2.608476  | 3.964893  | 0.668347  | H | 1.465883  | 2.419066  | -0.173969 | H | 2.692106  | 3.925386  | 0.819850  | H | 2.240841  | 1.559644  | 0.956283  |
| H | 2.507090  | 3.192537  | -0.925750 | H | -2.462321 | -1.346519 | 1.251387  | H | 2.569884  | 3.223698  | -0.805115 | H | 1.057157  | 2.774807  | 2.715499  |
| C | 2.089868  | -0.923956 | -0.193725 | H | -1.301560 | -2.202577 | 3.222644  | C | 2.062880  | -0.911687 | -0.225214 | H | 0.250318  | 1.222452  | 2.435127  |
| O | 2.219695  | -2.078171 | 0.172073  | H | -0.420072 | -0.800405 | 2.593003  | O | 2.168877  | -2.078947 | 0.105639  | H | -0.460673 | 2.728129  | 1.801150  |
| S | 3.270576  | -0.060650 | -1.194509 | H | 0.194166  | -2.447784 | 2.303951  | S | 3.261434  | -0.043537 | -1.201115 | H | 0.676385  | 3.911688  | -0.206341 |
| C | 4.587360  | -1.310066 | -1.179589 | H | -1.050343 | -3.982876 | 0.633835  | C | 4.552984  | -1.318972 | -1.222238 | H | 2.209153  | 3.965722  | 0.681296  |
| C | 5.369148  | -1.437114 | 0.098060  | H | -2.567153 | -3.747277 | 1.519208  | C | 5.332880  | -1.495738 | 0.050660  | H | 2.140345  | 3.190555  | -0.913156 |
| C | 5.152001  | -0.803031 | 1.248512  | H | -2.485922 | -3.356961 | -0.209539 | C | 5.129227  | -0.887316 | 1.217335  | H | 4.071239  | -2.172633 | -1.493559 |
| H | 4.155334  | -2.274044 | -1.463039 | H | -4.166895 | 1.860685  | -1.905701 | H | 4.101800  | -2.266242 | -1.530911 | H | 5.097834  | -0.848332 | -2.025017 |
| H | 5.251261  | -1.007578 | -1.996213 | H | -5.272900 | 0.511807  | -2.122542 | H | 5.222163  | -1.007722 | -2.031256 | H | 6.109878  | -1.963437 | -0.021683 |
| H | 6.192247  | -2.147451 | 0.024853  | H | -6.171619 | 2.075205  | -0.386647 | H | 6.141156  | -2.220690 | -0.041922 | H | 5.680692  | -0.829770 | 2.070186  |
| H | 5.790780  | -0.985673 | 2.106925  | H | -5.730645 | 1.399591  | 1.892388  | H | 5.764216  | -1.105166 | 2.070329  | H | 4.186838  | 0.007647  | 1.361364  |
| H | 4.343144  | -0.086777 | 1.377880  | H | -4.297696 | 0.355297  | 1.353057  | H | 4.335136  | -0.158248 | 1.365422  |   |           |           |           |
| O | -3.345533 | -2.813840 | -0.255350 | O | 2.901324  | 3.662021  | 0.800647  | O | -3.200470 | -3.248987 | 0.102925  |   |           |           |           |
| H | -3.941235 | -2.993076 | 0.500369  | H | 2.365822  | 4.079100  | 1.504668  | H | -3.134806 | -4.205419 | 0.227129  |   |           |           |           |

H15-Abs

|   | MCR                                                                               | TS                                                                                 | MCP                                                                                 | RAD                                                                                 |
|---|-----------------------------------------------------------------------------------|------------------------------------------------------------------------------------|-------------------------------------------------------------------------------------|-------------------------------------------------------------------------------------|
|   | 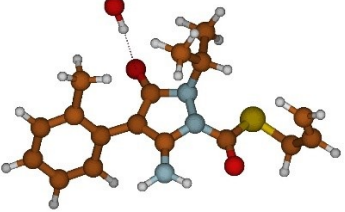 |  |  |  |
| C | -2.998648 -2.114475 -0.694306                                                     | C -3.023388 -1.959990 -0.896618                                                    | C -3.295802 -0.476419 -1.576571                                                     | C -0.459140 -0.888314 0.206752                                                      |
| C | -2.693007 -0.872853 -0.113094                                                     | C -2.644208 -0.835303 -0.152520                                                    | C -2.667278 -0.577895 -0.335250                                                     | C -1.435498 0.028711 -0.140426                                                      |
| C | -3.729723 -0.081102 0.421097                                                      | C -3.616865 -0.129570 0.588230                                                     | C -3.435068 -0.938726 0.819362                                                      | C -0.769899 1.257985 -0.431926                                                      |
| C | -5.043285 -0.561124 0.340014                                                      | C -4.949832 -0.560308 0.529187                                                     | C -4.811782 -1.247339 0.630412                                                      | N 0.630769 1.079019 -0.245429                                                       |
| C | -5.338512 -1.792798 -0.238317                                                     | C -5.318582 -1.673324 -0.221139                                                    | C -5.409739 -1.151400 -0.613350                                                     | N 0.793177 -0.259600 0.172260                                                       |
| C | -4.308658 -2.579217 -0.755395                                                     | C -4.350449 -2.382953 -0.932326                                                    | C -4.656118 -0.751525 -1.725744                                                     | C -2.883508 -0.197357 -0.257786                                                     |
| C | -1.283134 -0.436579 -0.071000                                                     | C -1.227721 -0.414344 -0.144431                                                    | C -1.237654 -0.249482 -0.227080                                                     | C -3.523571 0.113423 -1.459015                                                      |
| C | -0.745041 0.757002 -0.620403                                                      | C -0.689390 0.757649 -0.737509                                                     | C -0.650067 0.979564 -0.639181                                                      | C -4.893579 -0.091752 -1.627534                                                     |
| N | 0.660863 0.773837 -0.422030                                                       | N 0.715024 0.788064 -0.521477                                                      | N 0.750441 0.924902 -0.417566                                                       | C -5.648116 -0.635579 -0.578472                                                     |
| N | 0.959069 -0.415475 0.275824                                                       | N 1.006652 -0.369397 0.231493                                                      | N 0.994821 -0.340802 0.156754                                                       | C -5.039427 -0.940821 0.625499                                                      |
| C | -0.219917 -1.144788 0.466395                                                      | C -0.171562 -1.096806 0.432308                                                     | C -0.209634 -1.048631 0.246802                                                      | C -3.651144 -0.708382 0.839087                                                      |
| O | -1.329187 1.695689 -1.193483                                                      | O -1.263795 1.677455 -1.347749                                                     | O -1.197974 2.009891 -1.068995                                                      | C -3.091069 -0.948092 2.112098                                                      |
| N | -0.213518 -2.334658 1.058632                                                      | N -0.175420 -2.265801 1.066251                                                     | N -0.249613 -2.306606 0.673559                                                      | O -1.244318 2.356689 -0.747721                                                      |
| C | 2.189066 -1.040676 0.053650                                                       | C 2.247152 -0.990027 0.072526                                                      | C 2.213950 -0.974463 -0.093969                                                      | C 1.289359 2.037569 0.710136                                                        |
| O | 2.493181 -2.054805 0.653430                                                       | O 2.542209 -1.974999 0.723814                                                      | O 2.474040 -2.051984 0.408695                                                       | C 1.589802 3.356552 0.016577                                                        |
| C | 1.222953 1.981407 0.279763                                                        | C 1.240944 2.032657 0.145083                                                       | C 1.318744 2.035566 0.426689                                                        | C 1.955713 -0.940725 -0.191464                                                      |
| C | 0.423389 2.324913 1.530027                                                        | C 0.382043 2.433755 1.338539                                                       | C 0.465170 2.287683 1.663894                                                        | S 3.079459 -0.010057 -1.196697                                                      |
| C | -3.475000 1.250518 1.078419                                                       | C -3.260318 1.044508 1.434928                                                      | C -2.888256 -0.938350 2.120714                                                      | C 4.457552 -1.191414 -1.205306                                                      |
| S | 3.219408 -0.246499 -1.148199                                                      | S 3.306927 -0.235759 -1.129301                                                     | S 3.299658 -0.092965 -1.179963                                                      | C 5.257227 -1.290406 0.063639                                                       |
| C | 4.714750 -1.248921 -0.915543                                                      | C 4.808595 -1.199269 -0.794359                                                     | C 4.760948 -1.155838 -1.006832                                                      | C 5.025465 -0.671084 1.219231                                                       |
| C | 5.506183 -0.985463 0.334921                                                       | C 5.549277 -0.858257 0.468394                                                      | C 5.519723 -1.037184 0.285262                                                       | N -0.577236 -2.185352 0.477836                                                      |
| C | 5.190448 -0.170676 1.339352                                                       | C 5.186709 0.004531 1.415306                                                       | C 5.197494 -0.307447 1.351184                                                       | O 2.150714 -2.087387 0.168277                                                       |
| C | 1.361327 3.146827 -0.686995                                                       | C 1.409013 3.148629 -0.873321                                                      | C 1.544422 3.280375 -0.415898                                                       | C 0.478197 2.197864 1.990282                                                        |
| H | -5.845647 0.045076 0.753398                                                       | H -5.701118 -0.016271 1.095794                                                     | H -5.397170 -1.538571 1.498423                                                      | H -5.624047 -1.347422 1.446431                                                      |
| H | -6.366737 -2.138922 -0.280820                                                     | H -6.356575 -1.990295 -0.245182                                                    | H -6.465171 -1.379831 -0.725163                                                     | H -6.711346 -0.813044 -0.707876                                                     |
| H | -4.523572 -3.541565 -1.209184                                                     | H -4.626282 -3.255883 -1.515446                                                    | H -5.122067 -0.666940 -2.702010                                                     | H -5.366186 0.154694 -2.572746                                                      |
| H | -2.193884 -2.712460 -1.115707                                                     | H -2.264043 -2.500052 -1.456388                                                    | H -2.704478 -0.185278 -2.440686                                                     | H -2.931554 0.508899 -2.280134                                                      |
| H | -2.462300 1.316200 1.484890                                                       | H -2.240207 1.007899 1.823035                                                      | H -1.865966 -0.635344 2.313466                                                      | H -2.061093 -0.702577 2.341204                                                      |

|   |           |           |           |   |           |           |           |   |           |           |           |   |           |           |           |
|---|-----------|-----------|-----------|---|-----------|-----------|-----------|---|-----------|-----------|-----------|---|-----------|-----------|-----------|
| H | -4.188831 | 1.414436  | 1.889805  | H | -3.978129 | 1.206050  | 2.242202  | H | -3.508298 | -1.215041 | 2.965754  | H | -3.711787 | -1.344421 | 2.907490  |
| H | -3.600954 | 2.068635  | 0.359712  | H | -3.318707 | 2.013060  | 0.812501  | H | -3.306569 | 1.692644  | 1.324236  | H | 0.232258  | -2.748186 | 0.701141  |
| H | 0.646900  | -2.744698 | 1.396450  | H | 0.682933  | -2.674245 | 1.411402  | H | 0.588493  | -2.782393 | 0.979575  | H | -1.489650 | -2.617040 | 0.408338  |
| H | -1.073055 | -2.867278 | 1.092179  | H | -1.030584 | -2.807017 | 1.075109  | H | -1.129957 | -2.804909 | 0.639714  | H | 2.241079  | 1.559676  | 0.956144  |
| H | 2.227424  | 1.671982  | 0.579649  | H | 2.232869  | 1.746760  | 0.503979  | H | 2.294616  | 1.659164  | 0.743046  | H | 1.057925  | 2.775478  | 2.715294  |
| H | 0.954069  | 3.095276  | 2.096344  | H | 0.877172  | 3.242275  | 1.883214  | H | 0.986947  | 2.983596  | 2.326299  | H | 0.250806  | 1.223167  | 2.435434  |
| H | 0.305176  | 1.447676  | 2.175014  | H | 0.246234  | 1.592335  | 2.026493  | H | 0.290174  | 1.358090  | 2.216537  | H | -0.460067 | 2.728799  | 1.801225  |
| H | -0.566978 | 2.712718  | 1.272722  | H | -0.601842 | 2.790531  | 1.015140  | H | -0.500988 | 2.727839  | 1.396627  | H | 0.676771  | 3.911686  | -0.206728 |
| H | 0.390507  | 3.561210  | -0.968608 | H | 0.443993  | 3.522503  | -1.221005 | H | 0.601228  | 3.740669  | -0.715707 | H | 2.209791  | 3.965662  | 0.680492  |
| H | 1.939194  | 3.935388  | -0.196817 | H | 1.947411  | 3.973745  | -0.398539 | H | 2.107441  | 4.004902  | 0.179268  | H | 2.140414  | 3.190113  | -0.913749 |
| H | 1.892138  | 2.841834  | -1.593353 | H | 1.989922  | 2.807169  | -1.734824 | H | 2.125560  | 3.043933  | -1.311809 | H | 4.071142  | -2.173182 | -1.493411 |
| H | 4.438749  | -2.305292 | -0.980477 | H | 4.551536  | -2.262107 | -0.814112 | H | 4.459145  | -2.192317 | -1.182144 | H | 5.097420  | -0.848847 | -2.025365 |
| H | 5.323947  | -1.025294 | -1.797584 | H | 5.445559  | -1.010243 | -1.664758 | H | 5.402210  | -0.865244 | -1.845578 | H | 6.109792  | -1.963614 | -0.021901 |
| H | 6.431928  | -1.558375 | 0.380415  | H | 6.480159  | -1.413935 | 0.578102  | H | 6.425026  | -1.643313 | 0.303946  | H | 5.681309  | -0.829103 | 2.069605  |
| H | 5.850665  | -0.070839 | 2.195118  | H | 5.813784  | 0.159411  | 2.287656  | H | 5.832092  | -0.309025 | 2.231819  | H | 4.187349  | 0.008225  | 1.360903  |
| H | 4.277989  | 0.422016  | 1.347974  | H | 4.267420  | 0.583999  | 1.359508  | H | 4.304202  | 0.312877  | 1.386770  |   |           |           |           |
| O | -2.167737 | 4.153276  | -0.310244 | O | -3.218036 | 3.208724  | -0.105022 | O | -3.347793 | 2.482784  | 0.767347  |   |           |           |           |
| H | -1.821360 | 3.265084  | -0.586057 | H | -2.507661 | 2.767483  | -0.630958 | H | -2.661031 | 2.343026  | 0.088747  |   |           |           |           |

| H22-Abs                                                                            |           |           |                                                                                     |   |          |                                                                                      |           |   |                                                                                      |           |           |   |           |           |           |
|------------------------------------------------------------------------------------|-----------|-----------|-------------------------------------------------------------------------------------|---|----------|--------------------------------------------------------------------------------------|-----------|---|--------------------------------------------------------------------------------------|-----------|-----------|---|-----------|-----------|-----------|
| MCR                                                                                |           |           | TS                                                                                  |   |          | MCP                                                                                  |           |   | RAD                                                                                  |           |           |   |           |           |           |
| 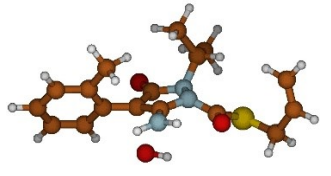 |           |           |  |   |          |  |           |   |  |           |           |   |           |           |           |
| C                                                                                  | -3.624818 | -0.075868 | -1.346962                                                                           | C | 3.633618 | -0.422876                                                                            | -1.301796 | C | -3.525704                                                                            | 0.338483  | -1.423361 | C | -0.465202 | -1.018116 | 0.321086  |
| C                                                                                  | -2.829124 | -0.283075 | -0.210127                                                                           | C | 2.945779 | 0.104768                                                                             | -0.170747 | C | -2.932275                                                                            | -0.081306 | -0.211266 | C | -1.428761 | -0.034388 | -0.103389 |
| C                                                                                  | -3.439102 | -0.549820 | 1.034784                                                                            | C | 3.671742 | 0.813813                                                                             | 0.836261  | C | -3.727859                                                                            | -0.678458 | 0.799102  | C | -0.707180 | 1.216255  | -0.332906 |
| C                                                                                  | -4.835163 | -0.657901 | 1.075958                                                                            | C | 5.032656 | 1.021476                                                                             | 0.627891  | C | -5.084455                                                                            | -0.875686 | 0.528534  | N | 0.631636  | 0.997283  | -0.037670 |
| C                                                                                  | -5.618186 | -0.481558 | -0.061139                                                                           | C | 5.681329 | 0.550022                                                                             | -0.513308 | C | -5.653192                                                                            | -0.499389 | -0.686087 | N | 0.795365  | -0.340859 | 0.386686  |
| C                                                                                  | -5.010201 | -0.174971 | -1.278387                                                                           | C | 4.979496 | -0.183509                                                                            | -1.479975 | C | -4.871825                                                                            | 0.117959  | -1.666497 | C | -2.858537 | -0.184235 | -0.272859 |
| C                                                                                  | -1.366428 | -0.117390 | -0.325552                                                                           | C | 1.543356 | -0.136124                                                                            | -0.102480 | C | -1.514330                                                                            | 0.146461  | -0.059219 | C | -3.421193 | 0.333924  | -1.459930 |
| C                                                                                  | -0.733346 | 1.171231  | -0.563296                                                                           | C | 0.886853 | -1.388848                                                                            | -0.511085 | C | -0.835400                                                                            | 1.392270  | -0.416061 | C | -4.776072 | 0.199366  | -1.719804 |

|   |           |           |           |   |           |           |           |   |           |           |           |   |           |           |           |
|---|-----------|-----------|-----------|---|-----------|-----------|-----------|---|-----------|-----------|-----------|---|-----------|-----------|-----------|
| N | 0.643429  | 1.060960  | -0.272922 | N | -0.485528 | -1.263622 | -0.262367 | N | 0.509247  | 1.245056  | -0.109724 | C | -5.594953 | -0.430090 | -0.778916 |
| N | 0.840960  | -0.249293 | 0.219545  | N | -0.690177 | 0.018186  | 0.288635  | N | 0.710318  | -0.021549 | 0.485012  | C | -5.053600 | -0.903800 | 0.413639  |
| C | -0.365408 | -0.943710 | 0.224189  | C | 0.481369  | 0.730838  | 0.323030  | C | -0.508895 | -0.760538 | 0.432898  | C | -3.689537 | -0.793830 | 0.698857  |
| O | -1.261371 | 2.221713  | -0.912910 | O | 1.413479  | -2.420899 | -0.894839 | O | -1.340200 | 2.436864  | -0.820940 | C | -3.190554 | -1.252072 | 2.046612  |
| N | -0.460958 | -2.206607 | 0.581969  | N | 0.545095  | 2.019997  | 0.535109  | N | -0.560646 | -2.023777 | 0.658471  | O | -1.177345 | 2.312088  | -0.628937 |
| C | 2.055244  | -0.900590 | -0.058721 | C | -1.948974 | 0.653651  | 0.121222  | C | 1.920172  | -0.679385 | 0.179648  | C | 1.367447  | 1.998478  | 0.799783  |
| O | 2.268607  | -2.014925 | 0.374848  | O | -2.208529 | 1.630970  | 0.786738  | O | 2.267950  | -1.656532 | 0.804879  | C | 1.718329  | 3.232295  | -0.017475 |
| C | 1.232713  | 2.106615  | 0.634874  | C | -1.158274 | -2.363823 | 0.516893  | C | 1.240523  | 2.365313  | 0.561527  | C | 1.956068  | -0.997500 | -0.057390 |
| C | 0.364049  | 2.328433  | 1.866615  | C | -0.347948 | -2.737387 | 1.751040  | C | 0.476104  | 2.850201  | 1.788059  | S | 2.933936  | -0.075952 | -1.224454 |
| C | -2.661966 | -0.685102 | 2.320501  | C | 3.068113  | 1.247023  | 2.146226  | C | -3.202225 | -1.033951 | 2.167383  | C | 4.347103  | -1.209388 | -1.334660 |
| S | 3.177049  | 0.021540  | -1.066196 | S | -2.976007 | -0.060064 | -1.112632 | S | 2.833809  | 0.017351  | -1.171221 | C | 5.294150  | -1.208716 | -0.167137 |
| C | 4.600367  | -1.100855 | -0.958736 | C | -4.400423 | 1.054311  | -0.931534 | C | 4.286340  | -1.069637 | -1.099794 | C | 5.164819  | -0.548974 | 0.982041  |
| C | 5.348624  | -1.100272 | 0.344866  | C | -5.271089 | 0.828044  | 0.271634  | C | 5.260522  | -0.807867 | 0.014504  | N | -0.576032 | -2.280554 | 0.515222  |
| C | 5.044562  | -0.433337 | 1.456198  | C | -5.084738 | -0.049072 | 1.255189  | C | 5.143920  | 0.075280  | 1.003763  | O | 2.245051  | -2.106856 | 0.334275  |
| C | 1.516421  | 3.379495  | -0.146276 | C | -1.456406 | -3.540492 | -0.397037 | C | 1.553812  | 3.474729  | -0.431121 | C | 0.584286  | 2.316899  | 2.068117  |
| H | -5.311443 | -0.865404 | 2.030695  | H | 5.602884  | 1.540655  | 1.392704  | H | -5.709029 | -1.317507 | 1.300220  | H | -5.704668 | -1.354987 | 1.157588  |
| H | -6.698373 | -0.567502 | 0.006879  | H | 6.743069  | 0.736223  | -0.640486 | H | -6.710641 | -0.671659 | -0.861098 | H | -6.659010 | -0.535527 | -0.966539 |
| H | -5.609269 | -0.015893 | -2.169352 | H | 5.487617  | -0.556657 | -2.362233 | H | -5.311428 | 0.424015  | -2.609866 | H | -5.192829 | 0.582698  | -2.645158 |
| H | -3.139858 | 0.153439  | -2.289029 | H | 3.070793  | -0.967695 | -2.051181 | H | -2.902896 | 0.805409  | -2.179710 | H | -2.770368 | 0.811199  | -2.185926 |
| H | -1.799028 | -0.012366 | 2.348624  | H | 2.163360  | 0.690778  | 2.398950  | H | -2.313007 | -0.458407 | 2.433931  | H | -2.272492 | -0.740674 | 2.344514  |
| H | -2.293336 | -1.705963 | 2.465450  | H | 2.831858  | 2.316297  | 2.140542  | H | -2.953874 | -2.098277 | 2.236831  | H | -3.000773 | -2.330548 | 2.058538  |
| H | -3.307217 | -0.446521 | 3.168956  | H | 3.797255  | 1.086583  | 2.943736  | H | -3.974021 | -0.834526 | 2.914620  | H | -3.953534 | -1.051946 | 2.802737  |
| H | 0.341367  | -2.717947 | 0.930415  | H | -0.300488 | 2.586087  | 0.614019  | H | 0.730081  | -3.328847 | -0.099200 | H | -1.545832 | -2.558568 | 0.351013  |
| H | -1.352767 | -2.676722 | 0.471610  | H | 1.421942  | 2.503732  | 0.367159  | H | -1.514293 | -2.357363 | 0.506064  | H | 2.294719  | 1.487774  | 1.071165  |
| H | 2.187596  | 1.678663  | 0.950310  | H | -2.106942 | -1.924102 | 0.833968  | H | 2.183457  | 1.916438  | 0.883995  | H | 1.200592  | 2.935027  | 2.726342  |
| H | 0.885936  | 2.995559  | 2.557866  | H | -0.939841 | -3.414211 | 2.372435  | H | 1.094420  | 3.566052  | 2.336122  | H | 0.321228  | 1.398937  | 2.603524  |
| H | 0.171791  | 1.383352  | 2.385157  | H | -0.106755 | -1.849815 | 2.345327  | H | 0.241354  | 2.015047  | 2.455358  | H | -0.331370 | 2.869448  | 1.837263  |
| H | -0.592034 | 2.790070  | 1.601204  | H | 0.580229  | -3.247317 | 1.477225  | H | -0.453779 | 3.349619  | 1.500833  | H | 0.829265  | 3.816714  | -0.261470 |
| H | 0.594620  | 3.884712  | -0.440701 | H | -0.540320 | -4.041268 | -0.716059 | H | 0.650231  | 4.006103  | -0.735540 | H | 2.391168  | 3.858953  | 0.574375  |
| H | 2.091388  | 4.056510  | 0.491471  | H | -2.067111 | -4.258830 | 0.156361  | H | 2.228074  | 4.188222  | 0.050355  | H | 2.228767  | 2.956087  | -0.944128 |
| H | 2.105756  | 3.163982  | -1.041942 | H | -2.014659 | -3.218360 | -1.280265 | H | 2.049802  | 3.076429  | -1.320409 | H | 3.969222  | -2.218959 | -1.519938 |
| H | 4.265078  | -2.110819 | -1.210932 | H | -4.030699 | 2.084225  | -0.959564 | H | 3.941733  | -2.107995 | -1.073500 | H | 4.873498  | -0.896007 | -2.242277 |
| H | 5.258895  | -0.771879 | -1.769422 | H | -4.976112 | 0.896398  | -1.849418 | H | 4.777962  | -0.922406 | -2.067248 | H | 6.165702  | -1.843463 | -0.325143 |
| H | 6.230376  | -1.740190 | 0.327650  | H | -6.138869 | 1.486404  | 0.294151  | H | 6.143513  | -1.444454 | -0.034846 | H | 5.921876  | -0.635772 | 1.755134  |
| H | 5.670947  | -0.519756 | 2.338402  | H | -5.792596 | -0.114799 | 2.075281  | H | 5.922728  | 0.167941  | 1.754163  | H | 4.313757  | 0.095255  | 1.193251  |
| H | 4.175061  | 0.216605  | 1.530096  | H | -4.234019 | -0.726892 | 1.281425  | H | 4.281976  | 0.731858  | 1.101775  |   |           |           |           |
| O | -0.991196 | -0.776474 | -2.347860 | O | -1.442027 | 3.722015  | -1.266947 | O | 1.241203  | -3.958091 | -0.641765 |   |           |           |           |
| H | -0.070031 | -1.082459 | -2.289762 | H | -2.062357 | 3.384094  | -0.609778 | H | 2.141230  | -3.606214 | -0.619086 |   |           |           |           |

| H27-Abs |    |     |     |
|---------|----|-----|-----|
| MCR     | TS | MCP | RAD |

|                                                                                   |           |           |           |                                                                                    |           |           |           |                                                                                     |           |           |           |                                                                                     |           |           |           |
|-----------------------------------------------------------------------------------|-----------|-----------|-----------|------------------------------------------------------------------------------------|-----------|-----------|-----------|-------------------------------------------------------------------------------------|-----------|-----------|-----------|-------------------------------------------------------------------------------------|-----------|-----------|-----------|
| 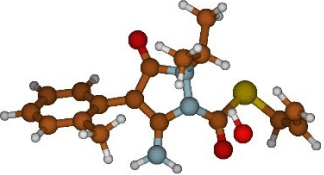 |           |           |           |  |           |           |           |  |           |           |           |  |           |           |           |
| C                                                                                 | -3.033707 | -0.148594 | -0.319625 | C                                                                                  | -3.591784 | -0.412851 | -1.527453 | C                                                                                   | -3.083698 | -0.267687 | -0.260498 | C                                                                                   | -0.826374 | 1.345543  | -0.251577 |
| C                                                                                 | -3.715618 | -0.823127 | 0.714063  | C                                                                                  | -2.997130 | -0.334490 | -0.258240 | C                                                                                   | -3.803381 | -0.574860 | 0.912720  | C                                                                                   | -1.481212 | 0.080788  | -0.209358 |
| C                                                                                 | -5.103158 | -0.982504 | 0.603861  | C                                                                                  | -3.795618 | -0.467206 | 0.896328  | C                                                                                   | -5.183678 | -0.791658 | 0.809204  | C                                                                                   | -0.495781 | -0.889731 | -0.146200 |
| C                                                                                 | -5.812404 | -0.477498 | -0.482647 | C                                                                                  | -5.166309 | -0.706816 | 0.733691  | C                                                                                   | -5.849813 | -0.691683 | -0.409331 | N                                                                                   | 0.755268  | -0.270036 | -0.115687 |
| C                                                                                 | -5.136477 | 0.210427  | -1.491716 | C                                                                                  | -5.747687 | -0.795323 | -0.528459 | C                                                                                   | -5.137119 | -0.362564 | -1.563483 | N                                                                                   | 0.585611  | 1.125306  | -0.242405 |
| C                                                                                 | -3.757203 | 0.368736  | -1.406023 | C                                                                                  | -4.957022 | -0.639231 | -1.667925 | C                                                                                   | -3.764110 | -0.155477 | -1.483574 | C                                                                                   | -2.942423 | -0.107596 | -0.247924 |
| C                                                                                 | -1.577461 | 0.072279  | -0.275393 | C                                                                                  | -1.549887 | -0.068223 | -0.176267 | C                                                                                   | -1.632178 | -0.014610 | -0.238675 | C                                                                                   | -3.632816 | -0.808855 | 0.761912  |
| C                                                                                 | -3.003346 | -1.355180 | 1.930999  | C                                                                                  | -0.894770 | 1.043013  | -0.784526 | C                                                                                   | -3.141046 | -0.654565 | 2.264161  | C                                                                                   | -5.024880 | -0.929075 | 0.656670  |
| H                                                                                 | -5.633104 | -1.500424 | 1.399422  | N                                                                                  | 0.504304  | 0.970489  | -0.482249 | H                                                                                   | -5.743051 | -1.027652 | 1.711103  | C                                                                                   | -5.729648 | -0.361337 | -0.401181 |
| H                                                                                 | -6.888444 | -0.612110 | -0.537033 | N                                                                                  | 0.673090  | -0.191326 | 0.300625  | H                                                                                   | -6.921390 | -0.860255 | -0.456343 | C                                                                                   | -5.044498 | 0.352146  | -1.386146 |
| H                                                                                 | -5.678558 | 0.615836  | -2.340334 | C                                                                                  | -0.578071 | -0.815365 | 0.461550  | H                                                                                   | -5.645895 | -0.272864 | -2.518169 | C                                                                                   | -3.661395 | 0.472652  | -1.305521 |
| H                                                                                 | -3.219518 | 0.893943  | -2.191068 | O                                                                                  | -1.365673 | 1.990330  | -1.422217 | H                                                                                   | -3.197404 | 0.091192  | -2.377593 | C                                                                                   | -2.927561 | -1.410161 | 1.950394  |
| H                                                                                 | -2.132876 | -0.743255 | 2.185994  | N                                                                                  | -0.689723 | -1.976913 | 1.098657  | H                                                                                   | -2.290429 | 0.029924  | 2.335760  | N                                                                                   | -0.616806 | -2.214825 | -0.172968 |
| H                                                                                 | -2.651742 | -2.380906 | 1.772574  | C                                                                                  | 1.817545  | -0.971935 | 0.054237  | H                                                                                   | -2.770164 | -1.664735 | 2.470098  | C                                                                                   | 1.950991  | -0.874500 | -0.468266 |
| H                                                                                 | -3.680950 | -1.371407 | 2.788003  | O                                                                                  | 2.038485  | -1.971899 | 0.709242  | H                                                                                   | -3.857173 | -0.403402 | 3.050174  | S                                                                                   | 3.181089  | 0.218355  | -1.128839 |
| C                                                                                 | -0.574815 | -0.873661 | -0.176432 | C                                                                                  | 1.044890  | 2.183145  | 0.196878  | C                                                                                   | -0.629915 | -0.851000 | 0.220426  | C                                                                                   | 4.571308  | -0.947671 | -1.151965 |
| N                                                                                 | 0.666382  | -0.223613 | -0.156721 | C                                                                                  | 0.189431  | 2.635850  | 1.367069  | N                                                                                   | 0.611810  | -0.212279 | 0.082202  | C                                                                                   | 5.177813  | -1.265515 | 0.186886  |
| N                                                                                 | 0.470327  | 1.170073  | -0.272925 | C                                                                                  | -3.223212 | -0.339125 | 2.284543  | N                                                                                   | 0.410620  | 1.040181  | -0.543524 | C                                                                                   | 4.771872  | -0.840731 | 1.381924  |
| C                                                                                 | -0.943869 | 1.348425  | -0.347619 | S                                                                                  | 2.839597  | -0.400788 | -1.272016 | C                                                                                   | -1.004045 | 1.168360  | -0.722018 | C                                                                                   | 1.353197  | 1.901786  | 0.699994  |
| O                                                                                 | -1.448709 | 2.476878  | -0.409030 | C                                                                                  | 4.051171  | -1.757449 | -1.275476 | O                                                                                   | -1.489100 | 2.213150  | -1.172582 | C                                                                                   | 1.751638  | 3.262310  | 0.257109  |
| N                                                                                 | -0.665204 | -2.201372 | -0.157738 | C                                                                                  | 5.122579  | -1.731157 | -0.223601 | N                                                                                   | -0.726428 | -2.092929 | 0.686916  | O                                                                                   | -1.290479 | 2.493026  | -0.245162 |
| H                                                                                 | 0.165431  | -2.778166 | -0.141191 | C                                                                                  | 5.261290  | -0.854259 | 0.768087  | H                                                                                   | 0.101271  | -2.624635 | 0.921022  | C                                                                                   | 1.218018  | 1.556550  | 2.143858  |
| H                                                                                 | -1.570559 | -2.626918 | -0.309607 | C                                                                                  | 1.393772  | 3.269517  | -0.796320 | H                                                                                   | -1.622969 | -2.559565 | 0.632329  | O                                                                                   | 2.114345  | -2.075049 | -0.325753 |
| C                                                                                 | 1.146755  | 1.910906  | 0.851572  | O                                                                                  | 3.174998  | 1.748653  | 1.609517  | C                                                                                   | 1.023741  | 2.144208  | 0.168662  | H                                                                                   | -5.561542 | -1.467023 | 1.434268  |
| C                                                                                 | 0.409049  | 1.724146  | 2.172110  | H                                                                                  | -5.786560 | -0.808302 | 1.620762  | C                                                                                   | 0.480463  | 2.437157  | 1.528056  | H                                                                                   | -6.809105 | -0.466875 | -0.451750 |
| C                                                                                 | 1.358362  | 3.369582  | 0.480022  | H                                                                                  | -6.814224 | -0.976044 | -0.622116 | C                                                                                   | 1.599391  | 3.227331  | -0.670262 | H                                                                                   | -5.582549 | 0.806720  | -2.212083 |
| H                                                                                 | 2.130656  | 1.441148  | 0.929374  | H                                                                                  | -5.399149 | -0.698323 | -2.657546 | H                                                                                   | 3.303271  | 1.620010  | 1.685534  | H                                                                                   | -3.116736 | 1.017591  | -2.072149 |
| H                                                                                 | 1.008019  | 2.148879  | 2.982362  | H                                                                                  | -2.964880 | -0.300283 | -2.408050 | H                                                                                   | 1.162949  | 3.082306  | 2.086577  | H                                                                                   | -2.026966 | -0.846833 | 2.211687  |
| H                                                                                 | 0.250367  | 0.661253  | 2.387907  | H                                                                                  | -2.847587 | -1.299948 | 2.653702  | H                                                                                   | 0.308933  | 1.520360  | 2.102864  | H                                                                                   | -2.625490 | -2.445156 | 1.754585  |
| H                                                                                 | -0.560969 | 2.231729  | 2.160528  | H                                                                                  | -3.993428 | 0.000386  | 2.981121  | H                                                                                   | -0.483101 | 2.965793  | 1.444310  | H                                                                                   | -3.593409 | -1.423816 | 2.816639  |



|   |          |           |           |   |           |           |           |   |          |           |           |   |           |           |           |
|---|----------|-----------|-----------|---|-----------|-----------|-----------|---|----------|-----------|-----------|---|-----------|-----------|-----------|
| H | 0.417652 | 3.922598  | 0.460189  | H | -2.391329 | 0.371417  | 2.310727  | H | 0.829699 | 3.965074  | -0.945796 | H | 0.196663  | -2.813824 | -0.129967 |
| H | 2.010460 | 3.826386  | 1.229868  | H | 0.125615  | -2.446527 | 1.469692  | H | 2.373508 | 3.763454  | -0.111133 | H | -1.535464 | -2.616045 | -0.307914 |
| H | 1.842813 | 3.456152  | -0.496789 | H | -1.576378 | -2.464256 | 1.067745  | H | 2.032255 | 2.831808  | -1.592307 | H | 2.032712  | 2.005428  | 2.718111  |
| C | 1.828254 | -0.796920 | -0.662399 | H | 2.055815  | 1.849286  | 0.650524  | C | 1.787011 | -0.917658 | -0.190520 | H | 1.227231  | 0.474277  | 2.309263  |
| O | 2.038893 | -1.992225 | -0.558233 | H | 0.704992  | 3.433159  | 1.907874  | O | 1.976047 | -2.026777 | 0.275230  | H | 0.270102  | 1.947308  | 2.549689  |
| S | 2.940614 | 0.337201  | -1.454420 | H | 0.003726  | 1.808951  | 2.060310  | S | 2.933424 | -0.082391 | -1.252048 | H | 0.986605  | 4.012314  | 0.508481  |
| C | 4.359659 | -0.786935 | -1.595257 | H | -0.771098 | 3.025756  | 1.012193  | C | 4.108959 | -1.447531 | -1.509984 | H | 2.675031  | 3.562647  | 0.764338  |
| C | 5.109398 | -1.050387 | -0.318451 | H | 0.488802  | 3.719970  | -1.213316 | C | 5.122477 | -1.710114 | -0.434155 | H | 1.913632  | 3.294909  | -0.823442 |
| C | 4.966550 | -0.423586 | 0.850585  | H | 1.960084  | 4.050252  | -0.280887 | C | 5.207967 | -1.121948 | 0.756177  | H | 4.254314  | -1.862948 | -1.659277 |
| H | 4.017624 | -1.723369 | -2.041608 | H | 2.001445  | 2.871531  | -1.613223 | H | 3.529244 | -2.351259 | -1.720303 | H | 5.314357  | -0.466218 | -1.796344 |
| H | 5.020161 | -0.307906 | -2.326526 | H | 3.499451  | -2.701216 | -1.236755 | H | 4.618788 | -1.175894 | -2.440377 | H | 6.040926  | -1.927015 | 0.117855  |
| H | 5.855809 | -1.838462 | -0.413839 | H | 4.505264  | -1.698471 | -2.270333 | H | 5.841674 | -2.481191 | -0.709607 | H | 5.297783  | -1.145041 | 2.281428  |
| H | 5.589846 | -0.691571 | 1.697718  | H | 5.839778  | -2.545006 | -0.328970 | H | 5.991513 | -1.400883 | 1.454138  | H | 3.915559  | -0.180605 | 1.509099  |
| H | 4.253516 | 0.385967  | 0.993746  | H | 6.085489  | -0.943738 | 1.469212  | H | 4.509734 | -0.351822 | 1.073977  |   |           |           |           |
| O | 2.857391 | -1.340177 | 2.439410  | H | 4.569651  | -0.027349 | 0.912049  | O | 3.240697 | 1.121378  | 2.512736  |   |           |           |           |
| H | 2.403578 | -0.492694 | 2.249632  | H | 2.799670  | 1.010380  | 2.131293  | H | 2.494637 | 0.521450  | 2.372851  |   |           |           |           |

| H28-Abs                                                                            |           |           |           |                                                                                     |           |           |           |                                                                                      |           |           |           |                                                                                      |           |           |           |
|------------------------------------------------------------------------------------|-----------|-----------|-----------|-------------------------------------------------------------------------------------|-----------|-----------|-----------|--------------------------------------------------------------------------------------|-----------|-----------|-----------|--------------------------------------------------------------------------------------|-----------|-----------|-----------|
| MCR                                                                                |           |           |           | TS                                                                                  |           |           |           | MCP                                                                                  |           |           |           | RAD                                                                                  |           |           |           |
| 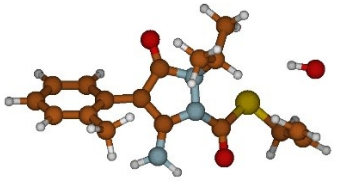 |           |           |           |  |           |           |           |  |           |           |           |  |           |           |           |
| C                                                                                  | -0.945255 | 1.193250  | -0.460594 | C                                                                                   | -0.841785 | 0.776593  | -1.007629 | C                                                                                    | -0.929675 | 0.904179  | -0.944546 | C                                                                                    | -3.530329 | 0.071840  | -1.506225 |
| C                                                                                  | -1.685531 | 0.003476  | -0.182716 | C                                                                                   | -1.544903 | -0.198124 | -0.239744 | C                                                                                    | -1.638992 | -0.115698 | -0.246035 | C                                                                                    | -2.867765 | -0.217946 | -0.303753 |
| C                                                                                  | -0.768796 | -0.976044 | 0.147775  | C                                                                                   | -0.596779 | -0.958483 | 0.418732  | C                                                                                    | -0.695432 | -0.950122 | 0.323373  | C                                                                                    | -3.605609 | -0.669689 | 0.809878  |
| N                                                                                  | 0.521346  | -0.426136 | 0.115622  | N                                                                                   | 0.680485  | -0.468102 | 0.111701  | N                                                                                    | 0.584605  | -0.469451 | 0.018314  | C                                                                                    | -4.987428 | -0.847391 | 0.665513  |
| N                                                                                  | 0.440697  | 0.924124  | -0.286112 | N                                                                                   | 0.560927  | 0.605359  | -0.796360 | N                                                                                    | 0.473269  | 0.677521  | -0.797047 | C                                                                                    | -5.636829 | -0.570722 | -0.535205 |
| C                                                                                  | -3.151784 | -0.113774 | -0.271039 | C                                                                                   | -3.011043 | -0.341314 | -0.200919 | C                                                                                    | -3.106959 | -0.221864 | -0.172479 | C                                                                                    | -4.905914 | -0.099656 | -1.626708 |
| C                                                                                  | -3.932505 | -0.543046 | 0.821825  | C                                                                                   | -3.732723 | -0.277872 | 1.008838  | C                                                                                    | -3.790425 | -0.209148 | 1.060664  | C                                                                                    | -1.413534 | 0.005773  | -0.223147 |
| C                                                                                  | -5.322169 | -0.618039 | 0.659005  | C                                                                                   | -5.126555 | -0.412016 | 0.960665  | C                                                                                    | -5.188121 | -0.302962 | 1.048460  | C                                                                                    | -0.766779 | 1.254190  | -0.455301 |
| C                                                                                  | -5.937726 | -0.264201 | -0.538598 | C                                                                                   | -5.802542 | -0.585594 | -0.244088 | C                                                                                    | -5.903546 | -0.387718 | -0.143287 | N                                                                                    | 0.640447  | 1.091377  | -0.262110 |

|   |           |           |           |   |           |           |           |   |           |           |           |   |           |           |           |
|---|-----------|-----------|-----------|---|-----------|-----------|-----------|---|-----------|-----------|-----------|---|-----------|-----------|-----------|
| C | -5.162665 | 0.182657  | -1.610069 | C | -5.085964 | -0.623410 | -1.441314 | C | -5.223992 | -0.374946 | -1.362334 | N | 0.814929  | -0.262548 | 0.098406  |
| C | -3.780546 | 0.253097  | -1.471875 | C | -3.700476 | -0.503836 | -1.413209 | C | -3.835266 | -0.293939 | -1.370262 | C | -0.428978 | -0.908660 | 0.099526  |
| C | -3.323324 | -0.899411 | 2.153465  | C | -3.056439 | -0.051355 | 2.336543  | C | -3.064553 | -0.078334 | 2.374917  | O | -1.255832 | 2.359106  | -0.721782 |
| N | -0.960557 | -2.267570 | 0.408148  | N | -0.761143 | -2.032000 | 1.187192  | N | -0.869224 | -2.076410 | 1.009749  | N | -0.534066 | -2.214675 | 0.329971  |
| C | 1.639240  | -1.167447 | -0.264111 | C | 1.802030  | -1.293621 | 0.039868  | C | 1.694790  | -1.297980 | -0.115284 | C | 1.997985  | -0.908006 | -0.254165 |
| S | 2.787650  | -0.287595 | -1.289968 | S | 2.944546  | -0.885980 | -1.251632 | S | 2.842244  | -0.807727 | -1.374679 | O | 2.198789  | -2.069365 | 0.053183  |
| C | 4.183935  | -1.441573 | -1.200141 | C | 4.285846  | -2.013384 | -0.777161 | C | 4.198071  | -1.935963 | -0.946543 | C | 1.241267  | 2.016599  | 0.788065  |
| C | 4.956038  | -1.444416 | 0.088817  | C | 5.089384  | -1.619500 | 0.430680  | C | 4.982655  | -1.589213 | 0.288362  | C | 0.400349  | 2.070115  | 2.018705  |
| C | 4.586469  | -0.929973 | 1.265383  | C | 4.879822  | -0.587863 | 1.245826  | C | 4.717496  | -0.634817 | 1.178372  | C | -2.952495 | -0.939817 | 2.140856  |
| C | 1.174961  | 1.832232  | 0.663037  | C | 1.296546  | 1.825764  | -0.312231 | C | 1.244120  | 1.845634  | -0.206011 | S | 3.144816  | 0.091513  | -1.163323 |
| C | 1.605371  | 3.104991  | -0.047604 | C | 1.615066  | 2.754700  | -1.471928 | C | 1.564568  | 2.868567  | -1.283496 | C | 4.547365  | -1.060595 | -1.167659 |
| O | -1.349798 | 2.324975  | -0.757797 | O | -1.278489 | 1.688566  | -1.720425 | O | -1.359187 | 1.892700  | -1.552771 | C | 5.293101  | -1.207248 | 0.129248  |
| C | 0.374583  | 2.084197  | 1.935116  | C | 0.535102  | 2.501829  | 0.814199  | C | 0.547247  | 2.423023  | 0.980505  | C | 4.995455  | -0.656618 | 1.304290  |
| O | 1.786864  | -2.321576 | 0.092673  | O | 1.954637  | -2.215449 | 0.820612  | O | 1.840019  | -2.276629 | 0.595482  | C | 1.516139  | 3.383237  | 0.179208  |
| H | -5.928411 | -0.946440 | 1.499615  | H | -5.687518 | -0.361733 | 1.890615  | H | -5.720196 | -0.291924 | 1.996459  | H | -5.561607 | -1.193968 | 1.521139  |
| H | -7.017589 | -0.327565 | -0.632445 | H | -6.884120 | -0.680968 | -0.249624 | H | -6.987094 | -0.453887 | -0.121007 | H | -6.710287 | -0.713005 | -0.615394 |
| H | -5.630812 | 0.468809  | -2.546750 | H | -5.601661 | -0.750044 | -2.388091 | H | -5.770876 | -0.432370 | -2.298256 | H | -5.402375 | 0.127810  | -2.564886 |
| H | -3.166768 | 0.589422  | -2.303366 | H | -3.131502 | -0.542383 | -2.338377 | H | -3.294520 | -0.293068 | -2.313049 | H | -2.948926 | 0.428992  | -2.352246 |
| H | -2.415578 | -0.320548 | 2.348112  | H | -2.152254 | 0.555210  | 2.228481  | H | -2.159793 | 0.529438  | 2.273112  | H | -2.126554 | -0.245407 | 2.327684  |
| H | -3.055269 | -1.960746 | 2.200936  | H | -2.765440 | -0.998339 | 2.804867  | H | -2.762978 | -1.056782 | 2.765379  | H | -2.545007 | -1.955784 | 2.189975  |
| H | -4.037417 | -0.707921 | 2.958041  | H | -3.736646 | 0.456637  | 3.024373  | H | -3.714456 | 0.385112  | 3.120999  | H | -3.682086 | -0.839828 | 2.947898  |
| H | -0.177076 | -2.883335 | 0.581224  | H | 0.035060  | -2.526270 | 1.567256  | H | -0.077590 | -2.615683 | 1.333833  | H | 0.284665  | -2.779095 | 0.512767  |
| H | -1.884665 | -2.657802 | 0.275751  | H | -1.687434 | -2.430701 | 1.270505  | H | -1.804202 | -2.454382 | 1.091843  | H | -1.434383 | -2.658158 | 0.200424  |
| H | 2.075668  | 1.272598  | 0.927749  | H | 2.237914  | 1.438049  | 0.085538  | H | 2.182565  | 1.388265  | 0.120636  | H | 2.198647  | 1.546393  | 1.027440  |
| H | 1.000711  | 2.618594  | 2.654650  | H | 1.232247  | 3.309180  | 1.286590  | H | 2.819074  | 3.180252  | 1.764957  | H | 0.490449  | 1.304510  | 2.780257  |
| H | 0.060281  | 1.139935  | 2.392739  | H | 0.294365  | 1.823151  | 1.637664  | H | 0.500413  | 1.863373  | 1.908380  | H | -0.363187 | 2.833058  | 2.125790  |
| H | -0.511830 | 2.693166  | 1.733415  | H | -0.349025 | 3.049267  | 0.476119  | H | -0.022026 | 3.341721  | 0.890672  | H | 0.591882  | 3.927858  | -0.020399 |
| H | 0.748958  | 3.732405  | -0.303318 | H | 0.713187  | 3.219013  | -1.874310 | H | 0.670240  | 3.402229  | -1.609573 | H | 2.114226  | 3.964329  | 0.886591  |
| H | 2.261916  | 3.672246  | 0.618559  | H | 2.280854  | 3.545615  | -1.114445 | H | 2.271376  | 3.594869  | -0.871414 | H | 2.080073  | 3.283349  | -0.752454 |
| H | 2.159148  | 2.870611  | -0.961630 | H | 2.124179  | 2.210542  | -2.272209 | H | 2.027849  | 2.385399  | -2.148014 | H | 4.195603  | -2.034322 | -1.520119 |
| H | 3.828370  | -2.448808 | -1.438662 | H | 3.868555  | -3.016304 | -0.649924 | H | 3.799061  | -2.951958 | -0.876306 | H | 5.214844  | -0.664991 | -1.940492 |
| H | 4.837439  | -1.132241 | -2.021767 | H | 4.930835  | -2.047041 | -1.661357 | H | 4.851986  | -1.911393 | -1.824247 | H | 6.165398  | -1.855166 | 0.047327  |
| H | 5.918625  | -1.948509 | 0.010633  | H | 5.924069  | -2.292932 | 0.623477  | H | 5.853723  | -2.227805 | 0.432326  | H | 5.617367  | -0.845253 | 2.173719  |
| H | 5.240907  | -1.010412 | 2.127473  | H | 5.536690  | -0.413450 | 2.092182  | H | 5.363888  | -0.486406 | 2.037726  | H | 4.135375  | -0.004977 | 1.444320  |
| H | 3.629212  | -0.437714 | 1.424431  | H | 4.061000  | 0.114600  | 1.104109  | H | 3.856984  | 0.025082  | 1.090102  |   |           |           |           |
| O | 5.318237  | 1.447020  | 0.294774  | O | 2.240194  | 4.207670  | 1.771135  | O | 3.756629  | 2.987145  | 1.909693  |   |           |           |           |
| H | 4.347165  | 1.573632  | 0.267232  | H | 2.923778  | 3.976405  | 1.111595  | H | 3.988517  | 2.364018  | 1.207706  |   |           |           |           |

| H29-Abs                                                                           |           |           |           |                                                                                    |           |           |           |                                                                                     |           |           |           |                                                                                     |           |           |           |
|-----------------------------------------------------------------------------------|-----------|-----------|-----------|------------------------------------------------------------------------------------|-----------|-----------|-----------|-------------------------------------------------------------------------------------|-----------|-----------|-----------|-------------------------------------------------------------------------------------|-----------|-----------|-----------|
| MCR                                                                               |           |           |           | TS                                                                                 |           |           |           | MCP                                                                                 |           |           |           | RAD                                                                                 |           |           |           |
| 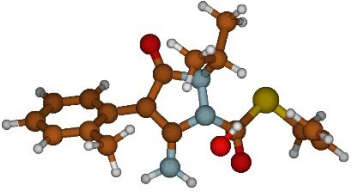 |           |           |           |  |           |           |           |  |           |           |           |  |           |           |           |
| C                                                                                 | -2.948172 | -0.123828 | -0.383508 | C                                                                                  | -5.613158 | -1.130368 | -0.159091 | C                                                                                   | -0.863683 | 1.440491  | -0.257625 | C                                                                                   | -3.530026 | 0.072264  | -1.506222 |
| C                                                                                 | -3.659350 | -0.803501 | 0.627052  | C                                                                                  | -5.134522 | 0.049460  | 0.410060  | C                                                                                   | -1.487806 | 0.169127  | -0.398536 | C                                                                                   | -2.867706 | -0.217889 | -0.303684 |
| C                                                                                 | -5.044277 | -0.955434 | 0.479593  | C                                                                                  | -3.773548 | 0.371970  | 0.385953  | C                                                                                   | -0.480992 | -0.778498 | -0.436949 | C                                                                                   | -3.605794 | -0.669991 | 0.809630  |
| C                                                                                 | -5.722906 | -0.438646 | -0.620862 | C                                                                                  | -2.883427 | -0.519010 | -0.248382 | N                                                                                   | 0.751954  | -0.135553 | -0.292276 | C                                                                                   | -4.987588 | -0.847675 | 0.664905  |
| C                                                                                 | -5.018147 | 0.254372  | -1.606488 | C                                                                                  | -3.369560 | -1.705855 | -0.812685 | N                                                                                   | 0.555108  | 1.257895  | -0.180656 | C                                                                                   | -5.636730 | -0.570629 | -0.535851 |
| C                                                                                 | -3.640933 | 0.405835  | -1.483881 | C                                                                                  | -4.726988 | -2.017765 | -0.767680 | C                                                                                   | -2.942675 | -0.059473 | -0.433852 | C                                                                                   | -4.905574 | -0.099194 | -1.627048 |
| C                                                                                 | -1.492821 | 0.088740  | -0.298647 | C                                                                                  | -1.438376 | -0.221357 | -0.306345 | C                                                                                   | -3.578795 | -0.851252 | 0.545531  | C                                                                                   | -1.413492 | 0.005815  | -0.222776 |
| C                                                                                 | -2.981417 | -1.350126 | 1.857432  | C                                                                                  | -0.827001 | 0.880857  | -0.968869 | C                                                                                   | -4.967000 | -1.017625 | 0.467188  | C                                                                                   | -0.766716 | 1.254273  | -0.454838 |
| H                                                                                 | -5.596961 | -1.477453 | 1.256826  | N                                                                                  | 0.588190  | 0.805135  | -0.781941 | C                                                                                   | -5.719265 | -0.406572 | -0.533616 | N                                                                                   | 0.640424  | 1.091479  | -0.261569 |
| H                                                                                 | -6.797715 | -0.568139 | -0.704360 | N                                                                                  | 0.800219  | -0.336345 | 0.020629  | C                                                                                   | -5.088242 | 0.397294  | -1.483642 | N                                                                                   | 0.814933  | -0.262389 | 0.099147  |
| H                                                                                 | -5.536199 | 0.669001  | -2.465595 | C                                                                                  | -0.427052 | -0.956809 | 0.281427  | C                                                                                   | -3.707552 | 0.564317  | -1.430353 | C                                                                                   | -0.428959 | -0.908547 | 0.100072  |
| H                                                                                 | -3.080827 | 0.934585  | -2.250650 | C                                                                                  | 1.227157  | 2.032538  | -0.196640 | C                                                                                   | -2.810683 | -1.493906 | 1.672680  | O                                                                                   | -1.255798 | 2.359181  | -0.721345 |
| H                                                                                 | -2.107422 | -0.752790 | 2.134495  | C                                                                                  | 1.488594  | 3.063252  | -1.288261 | N                                                                                   | -0.565507 | -2.086953 | -0.658245 | N                                                                                   | -0.533935 | -2.214602 | 0.330306  |
| H                                                                                 | -2.641526 | -2.380447 | 1.702865  | C                                                                                  | 2.001087  | -1.034581 | -0.059717 | C                                                                                   | 1.948894  | -0.641581 | -0.775226 | C                                                                                   | 1.997887  | -0.907975 | -0.253739 |
| H                                                                                 | -3.677904 | -1.359664 | 2.699281  | O                                                                                  | 2.220989  | -1.987583 | 0.666858  | S                                                                                   | 3.134338  | 0.581490  | -1.271850 | O                                                                                   | 2.198787  | -2.069189 | 0.054033  |
| C                                                                                 | -0.500683 | -0.863236 | -0.166300 | O                                                                                  | -1.341949 | 1.812485  | -1.600879 | C                                                                                   | 4.560861  | -0.521680 | -1.481548 | C                                                                                   | 1.241524  | 2.016904  | 0.788162  |
| N                                                                                 | 0.745972  | -0.220185 | -0.095421 | N                                                                                  | -0.504456 | -2.092005 | 0.971413  | C                                                                                   | 5.170599  | -1.065565 | -0.219340 | C                                                                                   | 0.400709  | 2.070961  | 2.018870  |
| N                                                                                 | 0.558541  | 1.173477  | -0.217948 | C                                                                                  | -3.276909 | 1.630579  | 1.047467  | C                                                                                   | 4.746190  | -0.894829 | 1.031318  | C                                                                                   | -2.953036 | -0.940625 | -2.140687 |
| C                                                                                 | -0.848540 | 1.361709  | -0.346658 | C                                                                                  | 0.429828  | 2.610708  | 0.956562  | C                                                                                   | 1.168498  | 1.795621  | 1.092526  | S                                                                                   | 3.144409  | 0.091182  | -1.163628 |
| O                                                                                 | -1.341978 | 2.493826  | -0.425379 | S                                                                                  | 3.138653  | -0.432122 | -1.276926 | C                                                                                   | 1.427263  | 3.295181  | 0.949903  | C                                                                                   | 4.546712  | -1.061212 | -1.168108 |
| N                                                                                 | -0.596812 | -2.189745 | -0.167180 | C                                                                                  | 4.579777  | -1.428070 | -0.800173 | O                                                                                   | -1.371458 | 2.562767  | -0.139662 | C                                                                                   | 5.292767  | -1.207907 | 0.128612  |
| H                                                                                 | 0.224698  | -2.771557 | -0.073266 | C                                                                                  | 5.274920  | -1.024902 | 0.470394  | C                                                                                   | 0.360651  | 1.456880  | 2.303374  | C                                                                                   | 4.996226  | -0.656228 | 1.303435  |
| H                                                                                 | -1.501096 | -2.613601 | -0.328505 | C                                                                                  | 4.892056  | -0.103243 | 1.351765  | O                                                                                   | 2.146128  | -1.843012 | -0.838126 | C                                                                                   | 1.516581  | 3.383327  | 0.178901  |
| C                                                                                 | 1.208469  | 1.930971  | 0.910995  | H                                                                                  | 2.192772  | 1.692537  | 0.184874  | H                                                                                   | -5.463785 | -1.625842 | 1.218928  | H                                                                                   | -5.561943 | -1.194541 | 1.520297  |
| C                                                                                 | 0.364435  | 1.896150  | 2.180313  | H                                                                                  | 0.971551  | 3.426850  | 1.439206  | H                                                                                   | -6.795162 | -0.549474 | -0.565141 | H                                                                                   | -6.710169 | -0.712896 | -0.616324 |

|   |           |           |           |   |           |           |           |   |           |           |           |   |           |           |           |
|---|-----------|-----------|-----------|---|-----------|-----------|-----------|---|-----------|-----------|-----------|---|-----------|-----------|-----------|
| C | 1.556757  | 3.341340  | 0.463737  | H | -0.581311 | 2.924487  | 0.681744  | H | -5.665429 | 0.885967  | -2.262348 | H | -5.401839 | 0.128567  | -2.565259 |
| H | 2.140525  | 1.390128  | 1.096647  | H | 0.291076  | 1.805848  | 1.795275  | H | -3.203096 | 1.180070  | -2.170368 | H | -2.948449 | 0.429692  | -2.352005 |
| H | 0.958403  | 2.276526  | 3.015968  | H | 2.037751  | 2.606202  | -2.116391 | H | -1.992439 | -0.850979 | 2.015239  | H | -2.126123 | -0.247339 | 2.327352  |
| H | 0.055793  | 0.873218  | 2.419784  | H | 2.096482  | 3.870346  | -0.871070 | H | -2.370383 | -2.450250 | 1.368469  | H | -2.547063 | -1.957189 | 2.190128  |
| H | -0.528029 | 2.521094  | 2.080675  | H | 0.559187  | 3.489204  | -1.669604 | H | -3.474467 | -1.692862 | 2.517237  | H | -3.682496 | -0.839381 | 2.947700  |
| H | 0.658935  | 3.937003  | 0.285870  | H | -2.671010 | -2.383677 | -1.297583 | H | 0.252635  | -2.678439 | -0.603390 | H | 0.284635  | -2.778814 | 0.514415  |
| H | 2.139786  | 3.825681  | 1.252271  | H | -1.401197 | -2.554555 | 1.044880  | H | -1.477808 | -2.495189 | -0.815536 | H | -1.434321 | -2.658100 | 0.201359  |
| H | 2.157346  | 3.323811  | -0.450031 | H | 0.323403  | -2.528319 | 1.353968  | H | 2.137448  | 1.297746  | 1.166646  | H | 2.198842  | 1.546629  | 1.027625  |
| C | 1.910547  | -0.791482 | -0.613127 | H | -5.826605 | 0.732098  | 0.896461  | H | 0.876652  | 1.213788  | 3.224847  | H | 0.490691  | 1.305573  | 2.780656  |
| O | 2.106268  | -1.990925 | -0.555655 | H | -4.066327 | 2.083451  | 1.651552  | H | 0.395206  | -1.097782 | 2.367984  | H | -0.362964 | 2.833829  | 2.125544  |
| S | 3.048792  | 0.362648  | -1.332042 | H | -2.418793 | 1.418913  | 1.694793  | H | -0.684776 | 1.743397  | 2.360587  | H | 0.592412  | 3.928115  | -0.020653 |
| C | 4.462138  | -0.762498 | -1.512292 | H | -2.947645 | 2.366544  | 0.306477  | H | 0.494585  | 3.859952  | 0.915201  | H | 2.114951  | 3.964462  | 0.886008  |
| C | 5.167383  | -1.142187 | -0.239648 | H | -5.088004 | -2.941083 | -1.209647 | H | 2.007329  | 3.631515  | 1.813398  | H | 2.080293  | 3.283088  | -0.752859 |
| C | 4.846266  | -0.787663 | 1.003137  | H | -6.674361 | -1.357175 | -0.120737 | H | 2.004361  | 3.495318  | 0.041874  | H | 4.194663  | -2.034907 | -1.520355 |
| H | 4.131050  | -1.656775 | -2.047318 | H | 4.277650  | -2.478299 | -0.755743 | H | 4.274792  | -1.338225 | -2.150416 | H | 5.214093  | -0.665848 | -1.941154 |
| H | 5.148839  | -0.229378 | -2.178197 | H | 5.264145  | -1.329613 | -1.649185 | H | 5.294232  | 0.087998  | -2.019549 | H | 6.164422  | -1.856696 | 0.046699  |
| H | 6.028541  | -1.788584 | -0.406814 | H | 6.188602  | -1.590382 | 0.651540  | H | 6.056749  | -1.672122 | -0.404609 | H | 5.618403  | -0.844875 | 2.172673  |
| H | 5.437883  | -1.133161 | 1.845106  | H | 5.486784  | 0.089237  | 2.239197  | H | 5.279620  | -1.349613 | 1.860090  | H | 4.136845  | -0.003678 | 1.443463  |
| H | 3.998091  | -0.143401 | 1.226349  | H | 3.987016  | 0.488678  | 1.228777  | H | 3.868551  | -0.300197 | 1.277898  |   |           |           |           |
| O | 1.328113  | -1.371963 | 2.309648  | O | 0.361267  | 0.816175  | 2.837442  | O | 1.047261  | -1.813734 | 2.403479  |   |           |           |           |
| H | 1.961496  | -0.633888 | 2.431118  | H | 1.132995  | 0.332147  | 2.479257  | H | 1.851877  | -1.422078 | 2.034279  |   |           |           |           |

| H30-Abs                                                                            |           |           |                                                                                     |   |           |                                                                                      |           |   |                                                                                      |           |           |   |           |           |           |
|------------------------------------------------------------------------------------|-----------|-----------|-------------------------------------------------------------------------------------|---|-----------|--------------------------------------------------------------------------------------|-----------|---|--------------------------------------------------------------------------------------|-----------|-----------|---|-----------|-----------|-----------|
| MCR                                                                                |           |           | TS                                                                                  |   |           | MCP                                                                                  |           |   | RAD                                                                                  |           |           |   |           |           |           |
| 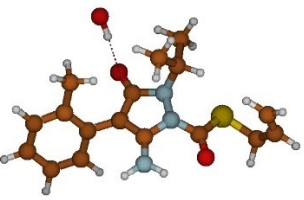 |           |           |  |   |           |  |           |   |  |           |           |   |           |           |           |
| C                                                                                  | -5.339014 | -1.792012 | -0.238136                                                                           | C | -5.413477 | -1.675034                                                                            | -0.235014 | C | -5.359373                                                                            | -1.784111 | -0.217473 | C | -0.393773 | -0.924834 | 0.389509  |
| C                                                                                  | -5.043470 | -0.560373 | 0.340121                                                                            | C | -5.097941 | -0.428936                                                                            | 0.301159  | C | -5.049574                                                                            | -0.550557 | 0.349926  | C | -1.404348 | -0.165134 | -0.166995 |
| C                                                                                  | -3.729787 | -0.080663 | 0.421152                                                                            | C | -3.776076 | 0.028763                                                                             | 0.369848  | C | -3.732402                                                                            | -0.078265 | 0.411977  | C | -0.795598 | 0.989272  | -0.736698 |
| C                                                                                  | -2.693265 | -0.872714 | -0.113006                                                                           | C | -2.752853 | -0.800493                                                                            | -0.131680 | C | -2.707246                                                                            | -0.880335 | -0.129567 | N | 0.616339  | 0.922378  | -0.523124 |

|   |           |           |           |   |           |           |           |   |           |           |           |   |           |           |           |
|---|-----------|-----------|-----------|---|-----------|-----------|-----------|---|-----------|-----------|-----------|---|-----------|-----------|-----------|
| C | -2.999233 | -2.114295 | -0.694115 | C | -3.078171 | -2.056505 | -0.668387 | C | -3.027255 | -2.123210 | -0.699546 | N | 0.830759  | -0.268178 | 0.205140  |
| C | -4.309359 | -2.578713 | -0.755175 | C | -4.396799 | -2.498594 | -0.718929 | C | -4.341042 | -2.580021 | -0.742251 | C | -2.846582 | -0.481309 | -0.160609 |
| C | -1.283319 | -0.436716 | -0.071026 | C | -1.335141 | -0.389881 | -0.092691 | C | -1.294159 | -0.454518 | -0.098326 | C | -3.760508 | 0.356761  | 0.511528  |
| C | -0.745151 | 0.756895  | -0.620240 | C | -0.759708 | 0.760032  | -0.701182 | C | -0.749625 | 0.739576  | -0.644872 | C | -5.118076 | 0.020529  | 0.482169  |
| N | 0.660703  | 0.773563  | -0.421936 | N | 0.645416  | 0.739770  | -0.487243 | N | 0.660612  | 0.742934  | -0.442220 | C | -5.570995 | -1.123290 | -0.174975 |
| N | 0.958862  | -0.415800 | 0.275793  | N | 0.898774  | -0.395588 | 0.310973  | N | 0.945975  | -0.440878 | 0.271032  | C | -4.661783 | -1.959618 | -0.820490 |
| C | -0.220127 | -1.145137 | 0.466207  | C | -0.304101 | -1.084316 | 0.514876  | C | -0.239672 | -1.164066 | 0.451185  | C | -3.307241 | -1.632210 | -0.813625 |
| C | 1.223251  | 1.981089  | 0.279503  | C | 1.275235  | 1.978000  | 0.074222  | C | 1.221921  | 1.959970  | 0.243082  | C | -3.293523 | 1.570671  | 1.271625  |
| C | 1.361928  | 3.146243  | -0.687540 | C | 1.539265  | 2.990346  | -1.029510 | C | 1.445898  | 3.082619  | -0.761330 | O | -1.311775 | 1.955932  | -1.312185 |
| C | 2.189010  | -1.040868 | 0.054105  | C | 2.110224  | -1.078270 | 0.148810  | C | 2.175723  | -1.072924 | 0.068278  | C | 1.206172  | 2.130309  | 0.188943  |
| O | 2.493255  | -2.054583 | 0.654478  | O | 2.382792  | -2.037089 | 0.845651  | O | 2.469867  | -2.082125 | 0.681117  | C | 0.361754  | 2.565940  | 1.338224  |
| O | -1.329368 | 1.695721  | -1.193123 | O | -1.307926 | 1.686985  | -1.322343 | O | -1.322489 | 1.687700  | -1.206616 | C | 2.031766  | -0.956160 | 0.042453  |
| N | -0.213562 | -2.335837 | 1.056609  | N | -0.341323 | -2.235610 | 1.179802  | N | -0.243344 | -2.351059 | 1.050025  | S | 3.162796  | -0.217548 | -1.105130 |
| C | -3.474749 | 1.250932  | 1.078420  | C | -3.489625 | 1.377853  | 0.974561  | C | -3.458277 | 1.257194  | 1.053361  | C | 4.591243  | -1.291921 | -0.788094 |
| C | 0.424042  | 2.325092  | 1.529858  | C | 0.504468  | 2.543886  | 1.253060  | C | 0.399684  | 2.354968  | 1.422989  | C | 5.328613  | -1.059041 | 0.500904  |
| S | 3.219207  | -0.247325 | -1.148314 | S | 3.160244  | -0.443850 | -1.127741 | S | 3.223391  | -0.291591 | -1.127339 | C | 4.999592  | -0.226423 | 1.486237  |
| C | 4.714613  | -1.249543 | -0.915199 | C | 4.615625  | -1.479665 | -0.805051 | C | 4.715224  | -1.290851 | -0.860945 | N | -0.466795 | -2.105026 | 1.001312  |
| C | 5.506157  | -0.985323 | 0.335032  | C | 5.438526  | -1.116143 | 0.398949  | C | 5.487784  | -1.011703 | 0.397890  | C | 1.483525  | 3.236816  | -0.816433 |
| C | 5.190930  | -0.169317 | 1.338633  | C | 5.180521  | -0.177174 | 1.306796  | C | 5.159425  | -0.181510 | 1.385500  | O | 2.258144  | -1.982481 | 0.657707  |
| H | 2.227648  | 1.671398  | 0.579329  | H | 2.244097  | 1.640626  | 0.457118  | H | 2.211987  | 1.634244  | 0.592259  | H | 2.163783  | 1.761108  | 0.568852  |
| H | 0.955066  | 3.095448  | 2.095861  | H | 1.117879  | 3.244257  | 1.824762  | H | 0.488427  | 3.363216  | 1.811046  | H | -0.250672 | 3.457578  | 1.266050  |
| H | -0.566284 | 2.713084  | 1.272709  | H | -0.395406 | 3.198942  | 0.889670  | H | -1.064603 | 4.590441  | 0.257187  | H | 0.324257  | 1.971586  | 2.243975  |
| H | 0.305758  | 1.448030  | 2.175071  | H | 0.082373  | 1.776271  | 1.909009  | H | -0.023731 | 1.588750  | 2.065251  | H | 2.067311  | 2.854846  | -1.658291 |
| H | 1.892425  | 2.840841  | -1.593942 | H | 2.161511  | 2.548892  | -1.812524 | H | 2.083239  | 2.737935  | -1.580064 | H | 2.060886  | 4.021961  | -0.320462 |
| H | 1.940213  | 3.934687  | -0.197663 | H | 2.070490  | 3.845131  | -0.601515 | H | 1.949155  | 3.909243  | -0.252349 | H | 0.558413  | 3.675178  | -1.194734 |
| H | 0.391246  | 3.560988  | -0.969075 | H | 0.608410  | 3.348115  | -1.472549 | H | 0.504535  | 3.449318  | -1.173067 | H | -2.590492 | -2.269060 | -1.326691 |
| H | -2.194637 | -2.712512 | -1.115499 | H | -2.281518 | -2.684607 | -1.060461 | H | -2.230958 | -2.728994 | -1.125921 | H | -1.352555 | -2.593935 | 1.005292  |
| H | -1.074252 | -2.866262 | 1.094725  | H | -1.214292 | -2.745316 | 1.220779  | H | -1.105393 | -2.879767 | 1.078918  | H | 0.366577  | -2.570457 | 1.334410  |
| H | 0.645492  | -2.743156 | 1.401043  | H | 0.498162  | -2.640583 | 1.571848  | H | 0.611395  | -2.760420 | 1.402642  | H | -5.828340 | 0.662491  | 0.996940  |
| H | -5.845658 | 0.046053  | 0.753509  | H | -5.890511 | 0.205788  | 0.689765  | H | -5.843242 | 0.062804  | 0.769414  | H | -4.111991 | 1.991887  | 1.859713  |
| H | -4.188906 | 1.415329  | 1.889429  | H | -4.236547 | 1.620313  | 1.734749  | H | -4.190848 | 1.457056  | 1.839514  | H | -2.472765 | 1.313926  | 1.950080  |
| H | -2.462228 | 1.316230  | 1.485387  | H | -2.497341 | 1.412310  | 1.434269  | H | -2.455840 | 1.301481  | 1.489160  | H | -2.920711 | 2.347716  | 0.596177  |
| H | -3.599939 | 2.068993  | 0.359508  | H | -3.524842 | 2.162020  | 0.211147  | H | -3.531500 | 2.064232  | 0.317114  | H | -5.002399 | -2.854776 | -1.331303 |
| H | -4.524510 | -3.541024 | -1.208929 | H | -4.628110 | -3.472735 | -1.138197 | H | -4.567416 | -3.543794 | -1.187375 | H | -6.630282 | -1.361956 | -0.176368 |
| H | -6.367313 | -2.137922 | -0.280590 | H | -6.447752 | -2.003615 | -0.269660 | H | -6.390135 | -2.124162 | -0.245060 | H | 4.264676  | -2.333269 | -0.860306 |
| H | 4.438706  | -2.305969 | -0.979552 | H | 4.291776  | -2.522666 | -0.747915 | H | 4.440140  | -2.347941 | -0.917001 | H | 5.256783  | -1.108467 | -1.637816 |
| H | 5.323713  | -1.026329 | -1.797421 | H | 5.218764  | -1.383390 | -1.713647 | H | 5.337461  | -1.077845 | -1.736469 | H | 6.223633  | -1.673355 | 0.595354  |
| H | 6.431576  | -1.558718 | 0.381069  | H | 6.336319  | -1.725488 | 0.498839  | H | 6.411264  | -1.586083 | 0.465587  | H | 5.618560  | -0.153528 | 2.374937  |
| H | 5.851251  | -0.068958 | 2.194258  | H | 5.859560  | -0.014246 | 2.137769  | H | 5.807094  | -0.071161 | 2.249516  | H | 4.116074  | 0.407334  | 1.446748  |
| H | 4.278785  | 0.423860  | 1.346700  | H | 4.298586  | 0.458058  | 1.258090  | H | 4.248810  | 0.413861  | 1.372082  |   |           |           |           |
| O | -2.166647 | 4.153471  | -0.310301 | O | -1.404362 | 4.019722  | 0.306055  | O | -1.898129 | 4.252866  | -0.096515 |   |           |           |           |
| H | -1.820169 | 3.265288  | -0.586159 | H | -1.579436 | 3.353363  | -0.396148 | H | -1.683008 | 3.355005  | -0.409966 |   |           |           |           |



| H31-Abs                                                                           |           |           |           |                                                                                    |           |           |           |                                                                                     |           |           |           |                                                                                     |           |           |           |
|-----------------------------------------------------------------------------------|-----------|-----------|-----------|------------------------------------------------------------------------------------|-----------|-----------|-----------|-------------------------------------------------------------------------------------|-----------|-----------|-----------|-------------------------------------------------------------------------------------|-----------|-----------|-----------|
| MCR                                                                               |           |           |           | TS                                                                                 |           |           |           | MCP                                                                                 |           |           |           | RAD                                                                                 |           |           |           |
| 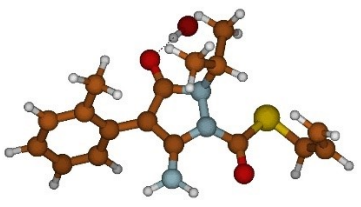 |           |           |           |  |           |           |           |  |           |           |           |  |           |           |           |
| C                                                                                 | -0.399416 | -1.164636 | 0.327624  | C                                                                                  | -5.510063 | -1.460989 | -0.268148 | C                                                                                   | -5.389639 | -1.691031 | -0.205897 | C                                                                                   | -0.384820 | -0.898432 | 0.422903  |
| C                                                                                 | -1.408254 | -0.286892 | -0.036201 | C                                                                                  | -5.100915 | -0.347448 | 0.464770  | C                                                                                   | -5.017800 | -0.533109 | 0.476694  | C                                                                                   | -1.395713 | -0.155476 | -0.157332 |
| C                                                                                 | -0.787279 | 0.955240  | -0.321432 | C                                                                                  | -3.753226 | 0.019146  | 0.546809  | C                                                                                   | -3.684710 | -0.112514 | 0.530503  | C                                                                                   | -0.785684 | 0.976552  | -0.770318 |
| N                                                                                 | 0.613563  | 0.839853  | -0.120525 | C                                                                                  | -2.803539 | -0.757879 | -0.148536 | C                                                                                   | -2.711414 | -0.880986 | -0.141299 | N                                                                                   | 0.625068  | 0.908648  | -0.558463 |
| N                                                                                 | 0.825343  | -0.489283 | 0.300869  | C                                                                                  | -3.220290 | -1.879285 | -0.878461 | C                                                                                   | -3.090509 | -2.046326 | -0.820947 | N                                                                                   | 0.840606  | -0.252302 | 0.213415  |
| C                                                                                 | -2.847420 | -0.599351 | -0.143259 | C                                                                                  | -4.565565 | -2.236837 | -0.938292 | C                                                                                   | -4.421553 | -2.457143 | -0.852984 | C                                                                                   | -2.836077 | -0.482020 | -0.150641 |
| C                                                                                 | -3.791955 | 0.071883  | 0.660006  | C                                                                                  | -1.369606 | -0.408840 | -0.106725 | C                                                                                   | -1.291653 | -0.475506 | -0.125815 | C                                                                                   | -3.764059 | 0.370455  | 0.482503  |
| C                                                                                 | -5.144111 | -0.254776 | 0.510441  | C                                                                                  | -0.782893 | 0.795408  | -0.579291 | C                                                                                   | -0.752713 | 0.726985  | -0.656608 | C                                                                                   | -5.117961 | 0.019524  | 0.454744  |
| C                                                                                 | -5.562062 | -1.231002 | -0.393333 | N                                                                                  | 0.623838  | 0.744392  | -0.367502 | N                                                                                   | 0.656527  | 0.734448  | -0.450836 | C                                                                                   | -5.554370 | -1.151250 | -0.164707 |
| C                                                                                 | -4.622508 | -1.905818 | -1.171204 | N                                                                                  | 0.868135  | -0.499075 | 0.254872  | N                                                                                   | 0.948788  | -0.463961 | 0.231899  | C                                                                                   | -4.631554 | -2.000635 | -0.772926 |
| C                                                                                 | -3.272795 | -1.583969 | -1.045415 | C                                                                                  | -0.341638 | -1.192822 | 0.386398  | C                                                                                   | -0.232812 | -1.196040 | 0.399530  | C                                                                                   | -3.280403 | -1.659866 | -0.766349 |
| C                                                                                 | -3.365573 | 1.098660  | 1.676089  | C                                                                                  | 1.221865  | 1.877409  | 0.418045  | C                                                                                   | 1.190712  | 1.937276  | 0.273526  | C                                                                                   | -3.316535 | 1.617553  | 1.198482  |
| O                                                                                 | -1.300257 | 2.035040  | -0.679123 | C                                                                                  | 1.528392  | 3.064546  | -0.469596 | C                                                                                   | 1.311245  | 3.076345  | -0.671772 | O                                                                                   | -1.298882 | 1.923959  | -1.380813 |
| C                                                                                 | 1.225682  | 1.826689  | 0.840850  | C                                                                                  | 2.076486  | -1.154756 | 0.006250  | C                                                                                   | 2.185242  | -1.078124 | 0.021961  | C                                                                                   | 1.219282  | 2.134112  | 0.088189  |
| C                                                                                 | 0.396722  | 1.955045  | 2.112879  | O                                                                                  | 2.332670  | -2.218267 | 0.539327  | O                                                                                   | 2.483342  | -2.102656 | 0.607090  | C                                                                                   | 0.418484  | 2.587561  | 1.305060  |
| C                                                                                 | 2.020842  | -1.126221 | -0.042365 | O                                                                                  | -1.324856 | 1.786472  | -1.095720 | O                                                                                   | -1.329499 | 1.678133  | -1.209578 | C                                                                                   | 2.039500  | -0.949959 | 0.070616  |
| S                                                                                 | 3.116887  | -0.158812 | -1.041829 | N                                                                                  | -0.388945 | -2.420210 | 0.895989  | N                                                                                   | -0.232309 | -2.399957 | 0.964026  | S                                                                                   | 3.153027  | -0.280347 | -1.134840 |
| C                                                                                 | 4.546375  | -1.277136 | -1.013938 | C                                                                                  | -3.337859 | 1.201473  | 1.382647  | C                                                                                   | -3.306633 | 1.117047  | 1.314240  | C                                                                                   | 4.590600  | -1.324744 | -0.763844 |
| C                                                                                 | 5.325815  | -1.327923 | 0.270375  | C                                                                                  | 0.387162  | 2.226641  | 1.644402  | C                                                                                   | 0.379080  | 2.261484  | 1.526675  | C                                                                                   | 5.340246  | -0.998367 | 0.497525  |
| C                                                                                 | 5.048057  | -0.706449 | 1.414592  | S                                                                                  | 3.156862  | -0.319984 | -1.122039 | S                                                                                   | 3.236280  | -0.250870 | -1.139844 | C                                                                                   | 5.025833  | -0.089427 | 1.418201  |
| N                                                                                 | -0.480204 | -2.455178 | 0.633998  | C                                                                                  | 4.613662  | -1.385096 | -0.926160 | C                                                                                   | 4.738795  | -1.235628 | -0.879718 | N                                                                                   | -0.458599 | -2.058744 | 1.071239  |
| C                                                                                 | 1.477337  | 3.160820  | 0.156685  | C                                                                                  | 5.383817  | -1.229597 | 0.355268  | C                                                                                   | 5.488521  | -0.981296 | 0.398108  | C                                                                                   | 1.392869  | 3.191395  | -0.938645 |
| O                                                                                 | 2.253114  | -2.261208 | 0.329182  | C                                                                                  | 5.069853  | -0.472387 | 1.404347  | C                                                                                   | 5.132574  | -0.185481 | 1.404370  | O                                                                                   | 2.272108  | -1.941663 | 0.737532  |
| O                                                                                 | 0.125801  | 3.319663  | -2.597723 | H                                                                                  | 2.187708  | 1.488182  | 0.755611  | H                                                                                   | 2.197686  | 1.632791  | 0.595202  | H                                                                                   | 2.207915  | 1.797866  | 0.431690  |
| H                                                                                 | 2.193869  | 1.386681  | 1.092160  | H                                                                                  | 0.922599  | 2.966490  | 2.245570  | H                                                                                   | 0.880344  | 3.060140  | 2.079940  | H                                                                                   | 0.973784  | 3.371297  | 1.826986  |

|   |           |           |           |   |           |           |           |   |           |           |           |   |           |           |           |
|---|-----------|-----------|-----------|---|-----------|-----------|-----------|---|-----------|-----------|-----------|---|-----------|-----------|-----------|
| H | 0.950552  | 2.549062  | 2.844918  | H | -0.578666 | 2.652248  | 1.355429  | H | -0.629651 | 2.599081  | 1.270239  | H | -0.553970 | 2.991979  | 1.008438  |
| H | -0.555211 | 2.457869  | 1.913406  | H | 0.216833  | 1.338826  | 2.261842  | H | 0.308596  | 1.383850  | 2.177309  | H | 0.263766  | 1.755872  | 1.999842  |
| H | 0.194917  | 0.972742  | 2.553314  | H | 1.901067  | 2.784675  | -1.457158 | H | 1.547608  | 2.897101  | -1.713923 | H | 1.822381  | 2.945487  | -1.902733 |
| H | 2.008892  | 3.023351  | -0.790377 | H | 2.222042  | 3.744519  | 0.031136  | H | 1.441651  | 4.071793  | -0.263985 | H | 1.222991  | 4.228795  | -0.678257 |
| H | 2.099877  | 3.774758  | 0.813800  | H | 0.584228  | 3.726576  | -0.650473 | H | -1.004278 | 4.665239  | 0.066126  | H | -2.553564 | -2.307639 | -1.250798 |
| H | 0.546235  | 3.702519  | -0.026605 | H | -2.476704 | -2.467733 | -1.410871 | H | -2.329171 | -2.627495 | -1.335968 | H | -1.345569 | -2.544772 | 1.096226  |
| H | -2.532708 | -2.092508 | -1.658794 | H | -1.266104 | -2.923935 | 0.868010  | H | -1.089577 | -2.937531 | 0.963554  | H | 0.373278  | -2.510233 | 1.426715  |
| H | -1.373286 | -2.921750 | 0.540128  | H | 0.452673  | -2.891323 | 1.199456  | H | 0.626818  | -2.822440 | 1.289541  | H | -5.838488 | 0.672615  | 0.940428  |
| H | 0.345899  | -2.988906 | 0.868754  | H | -5.838719 | 0.246475  | 0.998133  | H | -5.773664 | 0.053968  | 0.992020  | H | -4.140062 | 2.043997  | 1.775622  |
| H | -5.878581 | 0.259079  | 1.125260  | H | -4.169744 | 1.541485  | 2.003553  | H | -4.154566 | 1.468603  | 1.906382  | H | -2.488168 | 1.399704  | 1.880908  |
| H | -4.198982 | 1.355197  | 2.333930  | H | -2.497945 | 0.942402  | 2.035788  | H | -2.472140 | 0.906082  | 1.991501  | H | -2.962426 | 2.377149  | 0.493956  |
| H | -2.540177 | 0.722001  | 2.289266  | H | -3.012850 | 2.039277  | 0.756569  | H | -2.988046 | 1.930908  | 0.654101  | H | -4.959099 | -2.916512 | -1.254717 |
| H | -3.015940 | 2.016946  | 1.193187  | H | -4.871776 | -3.108035 | -1.508773 | H | -4.698698 | -3.362008 | -1.384649 | H | -6.611210 | -1.400481 | -0.165980 |
| H | -4.936167 | -2.670405 | -1.874885 | H | -6.562834 | -1.723637 | -0.309681 | H | -6.431753 | -1.995225 | -0.226406 | H | 4.268512  | -2.369785 | -0.759152 |
| H | -6.618106 | -1.466823 | -0.483971 | H | 4.304694  | -2.424986 | -1.065309 | H | 4.480549  | -2.294666 | -0.969233 | H | 5.245263  | -1.197924 | -1.632234 |
| H | 4.209834  | -2.277867 | -1.299091 | H | 5.249474  | -1.125711 | -1.779087 | H | 5.370399  | -0.989050 | -1.739573 | H | 6.232984  | -1.608715 | 0.631246  |
| H | 5.185399  | -0.913226 | -1.825451 | H | 6.289865  | -1.834266 | 0.382468  | H | 6.419533  | -1.543663 | 0.463582  | H | 5.654261  | 0.047732  | 2.292548  |
| H | 6.207639  | -1.964925 | 0.207367  | H | 5.712162  | -0.450200 | 2.279094  | H | 5.765203  | -0.090933 | 2.281314  | H | 4.145841  | 0.545697  | 1.338843  |
| H | 5.695428  | -0.827329 | 2.277452  | H | 4.176272  | 0.147968  | 1.431958  | H | 4.213139  | 0.396339  | 1.394093  |   |           |           |           |
| H | 4.179787  | -0.061881 | 1.535279  | O | -0.636516 | 4.447699  | -0.796198 | O | -1.742039 | 4.373613  | -0.485544 |   |           |           |           |
| H | -0.416303 | 2.865719  | -1.893226 | H | -1.119513 | 3.595351  | -0.895790 | H | -1.526336 | 3.448887  | -0.708420 |   |           |           |           |

| H32-Abs                                                                            |           |           |           |                                                                                     |           |           |           |                                                                                      |           |           |           |                                                                                      |           |           |           |
|------------------------------------------------------------------------------------|-----------|-----------|-----------|-------------------------------------------------------------------------------------|-----------|-----------|-----------|--------------------------------------------------------------------------------------|-----------|-----------|-----------|--------------------------------------------------------------------------------------|-----------|-----------|-----------|
| MCR                                                                                |           |           |           | TS                                                                                  |           |           |           | MCP                                                                                  |           |           |           | RAD                                                                                  |           |           |           |
| 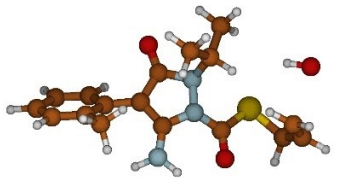 |           |           |           |  |           |           |           |  |           |           |           |  |           |           |           |
| C                                                                                  | -3.151767 | -0.113698 | -0.271130 | C                                                                                   | -0.826105 | 0.987467  | -0.707722 | C                                                                                    | -3.136528 | -0.095711 | -0.265668 | C                                                                                    | -0.755400 | 1.258837  | -0.462154 |
| C                                                                                  | -3.932531 | -0.542591 | 0.821861  | C                                                                                   | -1.586289 | -0.110395 | -0.206619 | C                                                                                    | -3.914818 | -0.469541 | 0.848964  | C                                                                                    | -1.403891 | 0.016516  | -0.196492 |
| C                                                                                  | -5.322174 | -0.617766 | 0.658972  | C                                                                                   | -0.685168 | -1.035240 | 0.287439  | C                                                                                    | -5.306798 | -0.527396 | 0.700018  | C                                                                                    | -0.418482 | -0.891497 | 0.144710  |
| C                                                                                  | -5.937665 | -0.264456 | -0.538827 | N                                                                                   | 0.617242  | -0.533760 | 0.141370  | C                                                                                    | -5.926329 | -0.208944 | -0.505462 | N                                                                                    | 0.826699  | -0.246563 | 0.129907  |
| C                                                                                  | -5.162569 | 0.182055  | -1.610409 | N                                                                                   | 0.558396  | 0.719262  | -0.504489 | C                                                                                    | -5.153133 | 0.184400  | -1.598990 | N                                                                                    | 0.648386  | 1.094466  | -0.268547 |



|   |           |           |           |   |           |           |           |   |           |           |           |   |           |           |           |
|---|-----------|-----------|-----------|---|-----------|-----------|-----------|---|-----------|-----------|-----------|---|-----------|-----------|-----------|
| C | -3.780459 | 0.252667  | -1.472143 | C | -3.056465 | -0.202873 | -0.247097 | C | -3.768884 | 0.236627  | -1.474492 | C | -2.856107 | -0.214192 | -0.297660 |
| C | -1.685519 | 0.003589  | -0.182701 | C | -3.823008 | -0.396951 | 0.920573  | C | -1.667626 | -0.003294 | -0.193611 | C | -3.613655 | -0.678759 | 0.797168  |
| C | -3.323374 | -0.898375 | 2.153663  | C | -5.217185 | -0.462464 | 0.798980  | C | -3.299259 | -0.784411 | 2.188066  | C | -4.991987 | -0.861136 | 0.623968  |
| H | -5.928454 | -0.945886 | 1.499663  | C | -5.850376 | -0.322096 | -0.433099 | H | -5.911243 | -0.813422 | 1.557223  | C | -5.619713 | -0.578442 | -0.586254 |
| H | -7.017514 | -0.327958 | -0.632743 | C | -5.088856 | -0.105227 | -1.582516 | H | -7.007813 | -0.257992 | -0.588552 | C | -4.869462 | -0.096177 | -1.659927 |
| H | -5.630682 | 0.467799  | -2.547231 | C | -3.702541 | -0.049286 | -1.484169 | H | -5.624432 | 0.442882  | -2.542099 | C | -3.497806 | 0.080653  | -1.511070 |
| H | -3.166647 | 0.588730  | -2.303714 | C | -3.191711 | -0.513078 | 2.284065  | H | -3.156605 | 0.530586  | -2.322972 | C | -2.991629 | -0.962057 | 2.140409  |
| H | -2.415990 | -0.318947 | 2.348341  | N | -0.906924 | -2.251085 | 0.780099  | H | -2.385014 | -0.207031 | 2.355476  | N | -0.521895 | -2.192998 | 0.400457  |
| H | -3.054672 | -1.959537 | 2.201367  | C | 1.709940  | -1.366548 | -0.104791 | H | -3.039516 | -1.845625 | 2.270924  | C | 2.004841  | -0.902467 | -0.226792 |
| H | -4.037710 | -0.707167 | 2.958087  | S | 2.887122  | -0.728446 | -1.265115 | H | -4.005652 | -0.558377 | 2.990412  | S | 3.129073  | 0.065959  | -1.196148 |
| C | -0.768946 | -0.975961 | 0.148126  | C | 4.166163  | -1.999738 | -1.058957 | C | -0.767020 | -0.988930 | 0.166706  | C | 4.534581  | -1.082381 | -1.185704 |
| N | 0.521283  | -0.426201 | 0.115932  | C | 4.977055  | -1.926967 | 0.204647  | N | 0.534009  | -0.468626 | 0.104261  | C | 5.304451  | -1.179521 | 0.101771  |
| N | 0.440800  | 0.924018  | -0.286059 | C | 4.821647  | -1.081630 | 1.221433  | N | 0.476391  | 0.864287  | -0.351484 | C | 5.033093  | -0.577155 | 1.257727  |
| C | -0.945102 | 1.193236  | -0.460729 | C | 1.306736  | 1.773276  | 0.261205  | C | -0.907806 | 1.158944  | -0.521489 | C | 1.255146  | 2.056419  | 0.722152  |
| O | -1.349522 | 2.324910  | -0.758272 | C | 1.631094  | 2.934265  | -0.657705 | O | -1.288406 | 2.290428  | -0.849396 | C | 1.441647  | 3.376112  | 0.070179  |
| N | -0.960793 | -2.267400 | 0.408848  | O | -1.206012 | 2.058066  | -1.199081 | N | -0.986056 | -2.263835 | 0.478726  | O | -1.239875 | 2.359209  | -0.756908 |
| H | -0.177280 | -2.883129 | 0.581934  | C | 0.567890  | 2.188687  | 1.526905  | H | -0.214515 | -2.890475 | 0.666212  | C | 0.455473  | 2.117360  | 2.019763  |
| H | -1.884894 | -2.657649 | 0.276434  | O | 1.814294  | -2.444851 | 0.450597  | H | -1.920223 | -2.637164 | 0.369823  | O | 2.213266  | -2.051987 | 0.115841  |
| C | 1.175068  | 1.832177  | 0.663062  | H | -5.812228 | -0.610552 | 1.696721  | C | 1.209122  | 1.806254  | 0.566974  | H | -5.580649 | -1.217258 | 1.465791  |
| C | 0.374299  | 2.084962  | 1.934759  | H | -6.933291 | -0.371522 | -0.494547 | C | 0.461147  | 2.029236  | 1.877318  | H | -6.690763 | -0.724854 | -0.688195 |
| C | 1.606306  | 3.104481  | -0.047891 | H | -5.570721 | 0.014333  | -2.547856 | C | 1.520261  | 3.059072  | -0.168470 | H | -5.348230 | 0.135585  | -2.606206 |
| H | 2.075364  | 1.272193  | 0.928456  | H | -3.099516 | 0.108570  | -2.374444 | H | 2.147115  | 1.278287  | 0.793090  | H | -2.902122 | 0.446065  | -2.343490 |
| H | 1.000439  | 2.619293  | 2.654330  | H | -2.273593 | 0.078321  | 2.352354  | H | 1.094236  | 2.606430  | 2.556366  | H | -2.134424 | -0.309445 | 2.331600  |
| H | 0.059412  | 1.141006  | 2.392613  | H | -2.933429 | -1.551552 | 2.519733  | H | 0.227242  | 1.073088  | 2.355853  | H | -2.640637 | -1.997837 | 2.209237  |
| H | -0.511763 | 2.694275  | 1.732546  | H | -3.887008 | -0.166934 | 3.052491  | H | -0.467047 | 2.584835  | 1.714143  | H | -3.726400 | -0.813835 | 2.935417  |
| H | 0.750214  | 3.732018  | -0.304400 | H | -0.139239 | -2.843913 | 1.065985  | H | 1.407888  | 4.019345  | 0.319863  | H | 0.298222  | -2.752534 | 0.592304  |
| H | 2.262595  | 3.671886  | 0.618388  | H | -1.844486 | -2.628876 | 0.735994  | H | 3.911965  | 2.927808  | 0.169842  | H | -1.419247 | -2.642536 | 0.271633  |
| H | 2.160550  | 2.869525  | -0.961488 | H | 2.248177  | 1.291273  | 0.538796  | H | 1.857871  | 3.016067  | -1.197689 | H | 2.239298  | 1.619340  | 0.943186  |
| C | 1.639135  | -1.167637 | -0.263676 | H | 1.206936  | 2.847498  | 2.121593  | C | 1.636059  | -1.248486 | -0.245479 | H | 1.006542  | 2.713309  | 2.751914  |
| O | 1.786707  | -2.321722 | 0.093309  | H | 0.320802  | 1.314109  | 2.137545  | O | 1.744748  | -2.396943 | 0.143411  | H | 0.310896  | 1.114620  | 2.433959  |
| S | 2.787467  | -0.287981 | -1.289707 | H | -0.353761 | 2.728092  | 1.287167  | S | 2.822739  | -0.429816 | -1.276864 | H | -0.521826 | 2.583198  | 1.860915  |
| C | 4.183714  | -1.442011 | -1.200001 | H | 0.801278  | 3.625479  | -0.809113 | C | 4.147422  | -1.666882 | -1.189385 | H | 1.240434  | 4.285976  | 0.621826  |
| C | 4.955999  | -1.444778 | 0.088849  | H | 2.469726  | 3.548775  | -0.138798 | C | 4.912273  | -1.731397 | 0.103227  | H | 1.889862  | 3.435340  | -0.914697 |
| C | 4.586882  | -0.929670 | 1.265260  | H | 2.066250  | 2.615996  | -1.608371 | C | 4.632325  | -1.112292 | 1.248775  | H | 4.179308  | -2.069098 | -1.495868 |
| H | 3.828122  | -2.449260 | -1.438410 | H | 3.697852  | -2.982866 | -1.159402 | H | 3.728648  | -2.646559 | -1.437793 | H | 5.186325  | -0.713634 | -1.984831 |
| H | 4.837091  | -1.132694 | -2.021737 | H | 4.817131  | -1.867392 | -1.929478 | H | 4.821198  | -1.393182 | -2.007506 | H | 6.171991  | -1.835001 | 0.030228  |
| H | 5.918318  | -1.949388 | 0.010698  | H | 5.767363  | -2.676055 | 0.246543  | H | 5.783116  | -2.384146 | 0.049576  | H | 5.671435  | -0.731894 | 2.121913  |
| H | 5.241415  | -1.010055 | 2.127283  | H | 5.477628  | -1.132216 | 2.084771  | H | 5.267852  | -1.249479 | 2.117974  | H | 4.178772  | 0.084351  | 1.386781  |
| H | 3.629888  | -0.436881 | 1.424235  | H | 4.047639  | -0.316941 | 1.233171  | H | 3.768705  | -0.460149 | 1.370613  |   |           |           |           |
| O | 5.317733  | 1.447518  | 0.293751  | O | 3.411954  | 4.235685  | 0.716885  | O | 4.769678  | 2.525024  | 0.370312  |   |           |           |           |
| H | 4.346567  | 1.573600  | 0.267045  | H | 2.772729  | 4.432177  | 1.429497  | H | 4.551393  | 1.646997  | 0.711892  |   |           |           |           |



| H33-Abs                                                                           |           |           |           |                                                                                    |           |           |           |                                                                                     |           |           |           |                                                                                     |           |           |           |
|-----------------------------------------------------------------------------------|-----------|-----------|-----------|------------------------------------------------------------------------------------|-----------|-----------|-----------|-------------------------------------------------------------------------------------|-----------|-----------|-----------|-------------------------------------------------------------------------------------|-----------|-----------|-----------|
| MCR                                                                               |           |           |           | TS                                                                                 |           |           |           | MCP                                                                                 |           |           |           | RAD                                                                                 |           |           |           |
| 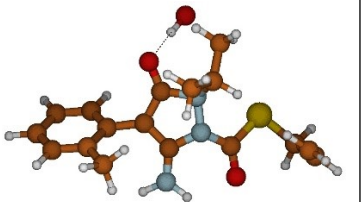 |           |           |           |  |           |           |           |  |           |           |           |  |           |           |           |
| C                                                                                 | -2.875545 | -0.314133 | -0.280280 | C                                                                                  | -0.769726 | 1.147187  | -0.090487 | C                                                                                   | -2.856480 | -0.335521 | -0.282297 | C                                                                                   | -0.755414 | 1.258162  | -0.463147 |
| C                                                                                 | -3.649525 | -1.080735 | 0.614593  | C                                                                                  | -1.453593 | -0.099332 | -0.136123 | C                                                                                   | -3.622356 | -1.164879 | 0.562218  | C                                                                                   | -1.403791 | 0.015989  | -0.196661 |
| C                                                                                 | -5.026559 | -1.187365 | 0.380535  | C                                                                                  | -0.492654 | -1.090144 | -0.025134 | C                                                                                   | -4.998790 | -1.269001 | 0.322704  | C                                                                                   | -0.418357 | -0.891648 | 0.145402  |
| C                                                                                 | -5.636627 | -0.544515 | -0.693441 | N                                                                                  | 0.766767  | -0.493815 | 0.126458  | C                                                                                   | -5.616325 | -0.564302 | -0.707102 | N                                                                                   | 0.826785  | -0.246561 | 0.130469  |
| C                                                                                 | -4.869380 | 0.231663  | -1.563399 | N                                                                                  | 0.622407  | 0.907347  | 0.089295  | C                                                                                   | -4.857496 | 0.273762  | -1.525678 | N                                                                                   | 0.648374  | 1.094179  | -0.268961 |
| C                                                                                 | -3.498492 | 0.340543  | -1.354406 | C                                                                                  | -2.908730 | -0.260539 | -0.304419 | C                                                                                   | -3.487505 | 0.381549  | -1.311166 | C                                                                                   | -2.855987 | -0.214858 | -0.297875 |
| C                                                                                 | -1.422955 | -0.140205 | -0.098887 | C                                                                                  | -3.689222 | -0.961146 | 0.637971  | C                                                                                   | -1.404950 | -0.159475 | -0.093959 | C                                                                                   | -3.613678 | -0.677671 | 0.797623  |
| C                                                                                 | -3.043730 | -1.764887 | 1.813077  | C                                                                                  | -5.068650 | -1.061810 | 0.416235  | C                                                                                   | -3.010927 | -1.918620 | 1.715260  | C                                                                                   | -4.991987 | -0.860123 | 0.624598  |
| H                                                                                 | -5.628425 | -1.775697 | 1.068639  | C                                                                                  | -5.674674 | -0.475074 | -0.691851 | H                                                                                   | -5.594390 | -1.905667 | 0.972226  | C                                                                                   | -5.619559 | -0.579147 | -0.586145 |
| H                                                                                 | -6.707355 | -0.641316 | -0.845472 | C                                                                                  | -4.900827 | 0.237213  | -1.609247 | H                                                                                   | -6.686302 | -0.661226 | -0.864248 | C                                                                                   | -4.869175 | -0.098607 | -1.660463 |
| H                                                                                 | -5.334172 | 0.743697  | -2.400083 | C                                                                                  | -3.527338 | 0.338610  | -1.412731 | H                                                                                   | -5.328233 | 0.834564  | -2.327026 | C                                                                                   | -3.497476 | 0.078285  | -1.511755 |
| H                                                                                 | -2.889605 | 0.934258  | -2.031102 | C                                                                                  | -3.086323 | -1.579895 | 1.872907  | H                                                                                   | -2.884953 | 1.023158  | -1.948764 | C                                                                                   | -2.991449 | -0.958650 | 2.141231  |
| H                                                                                 | -2.201150 | -1.194851 | 2.216301  | N                                                                                  | -0.629253 | -2.409519 | -0.107893 | H                                                                                   | -2.157830 | -1.380414 | 2.139306  | N                                                                                   | -0.521682 | -2.192941 | 0.402336  |
| H                                                                                 | -2.674588 | -2.765013 | 1.559814  | C                                                                                  | 1.931541  | -1.066405 | -0.386488 | H                                                                                   | -2.656582 | -2.907833 | 1.404526  | C                                                                                   | 2.005021  | -0.902464 | -0.226138 |
| H                                                                                 | -3.792718 | -1.882746 | 2.599751  | S                                                                                  | 3.081330  | 0.087541  | -1.083322 | H                                                                                   | -3.752843 | -2.070630 | 2.502839  | S                                                                                   | 3.128967  | 0.065726  | -1.196027 |
| C                                                                                 | -0.443570 | -1.119131 | -0.039004 | C                                                                                  | 4.461436  | -1.058321 | -1.361900 | C                                                                                   | -0.417038 | -1.130400 | -0.093288 | C                                                                                   | 4.534510  | -1.082508 | -1.185467 |
| N                                                                                 | 0.803038  | -0.506733 | 0.137610  | C                                                                                  | 5.223060  | -1.491447 | -0.140384 | N                                                                                   | 0.825368  | -0.518988 | 0.120120  | C                                                                                   | 5.304969  | -1.178791 | 0.101713  |
| N                                                                                 | 0.634881  | 0.892965  | 0.155934  | C                                                                                  | 4.948563  | -1.207803 | 1.131147  | N                                                                                   | 0.644599  | 0.875842  | 0.217606  | C                                                                                   | 5.033323  | -0.576863 | 1.257818  |
| C                                                                                 | -0.758651 | 1.109946  | 0.006747  | C                                                                                  | 1.238208  | 1.547253  | 1.302765  | C                                                                                   | -0.755050 | 1.091455  | 0.093691  | C                                                                                   | 1.254579  | 2.056852  | 0.721468  |
| O                                                                                 | -1.239734 | 2.260584  | 0.027688  | C                                                                                  | 1.317830  | 3.056785  | 1.155298  | O                                                                                   | -1.245382 | 2.228613  | 0.206439  | C                                                                                   | 1.440620  | 3.376378  | 0.068994  |
| N                                                                                 | -0.556863 | -2.434939 | -0.183696 | O                                                                                  | -1.215723 | 2.305048  | -0.146218 | N                                                                                   | -0.516848 | -2.437517 | -0.312034 | O                                                                                   | -1.239999 | 2.358261  | -0.758716 |
| H                                                                                 | 0.259456  | -3.032264 | -0.164575 | C                                                                                  | 0.495773  | 1.158837  | 2.578860  | H                                                                                   | 0.305985  | -3.025834 | -0.325589 | C                                                                                   | 0.454769  | 2.117885  | 2.018949  |
| H                                                                                 | -1.456100 | -2.820214 | -0.442858 | O                                                                                  | 2.108148  | -2.269963 | -0.346161 | H                                                                                   | -1.411560 | -2.817721 | -0.593161 | O                                                                                   | 2.213751  | -2.051785 | 0.116972  |
| C                                                                                 | 1.269238  | 1.506385  | 1.378427  | H                                                                                  | -5.675482 | -1.599317 | 1.140630  | C                                                                                   | 1.257206  | 1.433092  | 1.487281  | H                                                                                   | -5.580802 | -1.214899 | 1.466876  |
| C                                                                                 | 0.446428  | 1.227030  | 2.630017  | H                                                                                  | -6.747353 | -0.565487 | -0.833764 | C                                                                                   | 0.435281  | 1.063652  | 2.715836  | H                                                                                   | -6.690619 | -0.725580 | -0.687953 |
| C                                                                                 | 1.543375  | 2.985984  | 1.160766  | H                                                                                  | -5.362512 | 0.705556  | -2.472856 | C                                                                                   | 1.487956  | 2.891733  | 1.331600  | H                                                                                   | -5.347836 | 0.131830  | -2.607120 |

|   |           |           |           |   |           |           |           |   |           |           |           |   |           |           |           |
|---|-----------|-----------|-----------|---|-----------|-----------|-----------|---|-----------|-----------|-----------|---|-----------|-----------|-----------|
| H | 2.230163  | 0.992847  | 1.464307  | H | -2.913389 | 0.881941  | -2.126181 | H | 2.228419  | 0.926357  | 1.546379  | H | -2.901675 | 0.442440  | -2.344642 |
| H | 1.003813  | 1.560378  | 3.509498  | H | -2.238945 | -0.993459 | 2.241514  | H | 0.988591  | 1.347220  | 3.614854  | H | -2.137254 | -0.302223 | 2.333021  |
| H | 0.246306  | 0.155936  | 2.739470  | H | -2.723965 | -2.595262 | 1.676876  | H | 0.253096  | -0.015139 | 2.752212  | H | -2.635684 | -1.992774 | 2.210189  |
| H | -0.506186 | 1.765900  | 2.603921  | H | -3.834745 | -1.647515 | 2.666000  | H | -0.524795 | 1.588402  | 2.721965  | H | -3.727398 | -0.813835 | 2.935763  |
| H | 0.622506  | 3.573806  | 1.175726  | H | 0.175726  | -3.020056 | -0.057195 | H | 1.029820  | 3.598294  | 2.012898  | H | 0.298691  | -2.752356 | 0.593518  |
| H | 2.184488  | 3.341504  | 1.972383  | H | -1.535769 | -2.790314 | -0.347748 | H | 2.174335  | 3.249260  | 0.572384  | H | -1.418818 | -2.642764 | 0.272943  |
| H | 2.064619  | 3.153749  | 0.212756  | H | 2.253722  | 1.147184  | 1.336106  | H | 0.830608  | 4.459873  | -0.985324 | H | 2.238921  | 1.620323  | 0.942712  |
| C | 1.976631  | -1.036351 | -0.404739 | H | 1.023912  | 1.569989  | 3.443393  | C | 2.004418  | -1.005412 | -0.448035 | H | 1.005476  | 2.714330  | 2.750972  |
| O | 2.174679  | -2.236931 | -0.414473 | H | 0.450475  | 0.070955  | 2.690489  | O | 2.212635  | -2.201442 | -0.533231 | H | 0.310581  | 1.115239  | 2.433518  |
| S | 3.098352  | 0.166259  | -1.061236 | H | -0.522098 | 1.562713  | 2.574169  | S | 3.122667  | 0.244947  | -1.017636 | H | -0.522717 | 2.583243  | 1.859851  |
| C | 4.487197  | -0.944786 | -1.424479 | H | 0.402054  | 3.568156  | 1.453780  | C | 4.522928  | -0.830789 | -1.439050 | H | 1.237759  | 4.286443  | 0.619713  |
| C | 5.280922  | -1.428056 | -0.243048 | H | 2.182429  | 3.465420  | 1.682513  | C | 5.311702  | -1.382401 | -0.284546 | H | 1.889201  | 3.435321  | -0.915727 |
| C | 5.032550  | -1.210480 | 1.046704  | H | 1.476427  | 3.351937  | 0.022940  | C | 5.049819  | -1.253232 | 1.014381  | H | 4.179154  | -2.069447 | -1.494857 |
| H | 4.111098  | -1.790907 | -2.006842 | H | 4.086106  | -1.928153 | -1.908614 | H | 4.157359  | -1.641157 | -2.076413 | H | 5.185937  | -0.714249 | -1.985076 |
| H | 5.128026  | -0.359468 | -2.092166 | H | 5.124780  | -0.516531 | -2.044184 | H | 5.164000  | -0.200164 | -2.063770 | H | 6.173225  | -1.833297 | 0.029870  |
| H | 6.144835  | -2.027753 | -0.528333 | H | 6.085720  | -2.114073 | -0.376011 | H | 6.184378  | -1.953258 | -0.600658 | H | 5.672107  | -0.731037 | 2.121781  |
| H | 5.686343  | -1.621150 | 1.809685  | H | 5.579946  | -1.587571 | 1.928263  | H | 5.701466  | -1.706759 | 1.754590  | H | 4.178423  | 0.083814  | 1.387254  |
| H | 4.183428  | -0.622257 | 1.388749  | H | 4.099120  | -0.594189 | 1.424416  | H | 4.191562  | -0.697668 | 1.386826  |   |           |           |           |
| O | 0.198663  | 4.073549  | -1.400527 | O | 1.054713  | 3.718956  | -1.261441 | O | -0.055589 | 4.261743  | -1.313294 |   |           |           |           |
| H | -0.352484 | 3.429313  | -0.875332 | H | 0.147975  | 3.363179  | -1.124378 | H | -0.394288 | 3.563245  | -0.720121 |   |           |           |           |

| H40-Abs                                                                            |           |           |           |                                                                                     |           |           |           |                                                                                      |           |           |           |                                                                                      |           |           |           |
|------------------------------------------------------------------------------------|-----------|-----------|-----------|-------------------------------------------------------------------------------------|-----------|-----------|-----------|--------------------------------------------------------------------------------------|-----------|-----------|-----------|--------------------------------------------------------------------------------------|-----------|-----------|-----------|
| MCR                                                                                |           |           |           | TS                                                                                  |           |           |           | MCP                                                                                  |           |           |           | RAD                                                                                  |           |           |           |
| 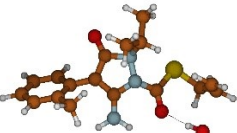 |           |           |           |  |           |           |           |  |           |           |           |  |           |           |           |
| C                                                                                  | -3.080274 | -0.264935 | -0.306491 | C                                                                                   | -1.029947 | 1.240085  | -0.635352 | C                                                                                    | -3.020751 | -0.368254 | -0.280457 | C                                                                                    | -0.734371 | 1.252643  | -0.419612 |
| C                                                                                  | -3.766111 | -0.963042 | 0.708671  | C                                                                                   | -1.593937 | 0.018021  | -0.158197 | C                                                                                    | -3.750016 | -0.833775 | 0.832847  | C                                                                                    | -1.389746 | 0.006395  | -0.184115 |
| C                                                                                  | -5.132571 | -1.218943 | 0.535034  | C                                                                                   | -0.558355 | -0.730068 | 0.366587  | C                                                                                    | -5.096447 | -1.176448 | 0.651052  | C                                                                                    | -0.410423 | -0.912076 | 0.140318  |
| C                                                                                  | -5.818492 | -0.786818 | -0.596926 | N                                                                                   | 0.635796  | 0.001317  | 0.256249  | C                                                                                    | -5.721935 | -1.050410 | -0.586260 | N                                                                                    | 0.837866  | -0.269908 | 0.143862  |
| C                                                                                  | -5.140305 | -0.076205 | -1.588634 | N                                                                                   | 0.373452  | 1.232172  | -0.382685 | C                                                                                    | -5.001921 | -0.567505 | -1.680248 | N                                                                                    | 0.666770  | 1.082124  | -0.223745 |

|   |           |           |           |   |           |           |           |   |           |           |           |   |           |           |           |
|---|-----------|-----------|-----------|---|-----------|-----------|-----------|---|-----------|-----------|-----------|---|-----------|-----------|-----------|
| C | -3.780950 | 0.177933  | -1.439785 | C | -3.019425 | -0.342900 | -0.258550 | C | -3.661333 | -0.232433 | -1.522677 | C | -2.842154 | -0.215541 | -0.301368 |
| C | -1.646266 | 0.056341  | -0.197311 | C | -3.786852 | -0.675861 | 0.876341  | C | -1.604934 | 0.027262  | -0.175959 | C | -3.610229 | -0.708339 | 0.773597  |
| C | -3.081053 | -1.418923 | 1.971266  | C | -5.138662 | -0.996918 | 0.695320  | C | -3.135119 | -0.953965 | 2.203673  | C | -4.987972 | -0.879576 | 0.584610  |
| H | -5.665872 | -1.754865 | 1.316289  | C | -5.732543 | -0.975295 | -0.563705 | H | -5.663200 | -1.533545 | 1.507372  | C | -5.605201 | -0.559979 | -0.621736 |
| H | -6.879036 | -0.995370 | -0.700370 | C | -4.974322 | -0.622420 | -1.681237 | H | -6.768597 | -1.318422 | -0.694079 | C | -4.844510 | -0.050745 | -1.675488 |
| H | -5.664923 | 0.272542  | -2.472674 | C | -3.627819 | -0.311644 | -1.523630 | H | -5.479755 | -0.457173 | -2.648673 | C | -3.473439 | 0.115936  | -1.511009 |
| H | -3.241145 | 0.721359  | -2.210845 | C | -3.205347 | -0.676637 | 2.266918  | H | -3.088698 | 0.135030  | -2.370142 | C | -3.000868 | -1.034695 | 2.112865  |
| H | -2.273227 | -0.738602 | 2.257301  | N | -0.568265 | -1.967190 | 0.856633  | H | -2.345538 | -0.212347 | 2.357123  | N | -0.517545 | -2.219232 | 0.366716  |
| H | -2.645324 | -2.417313 | 1.852502  | C | 1.865480  | -0.611120 | 0.050123  | H | -2.694205 | -1.945022 | 2.359097  | C | 2.008941  | -0.926863 | -0.225852 |
| H | -3.799589 | -1.471967 | 2.792649  | S | 2.935844  | 0.245974  | -1.081092 | H | -3.898624 | -0.813551 | 2.972711  | S | 3.129608  | 0.070879  | -1.204573 |
| C | -0.588314 | -0.813541 | -0.019534 | C | 4.438160  | -0.715570 | -0.835440 | C | -0.536311 | -0.730122 | 0.261268  | C | 4.545055  | -0.974214 | -1.223773 |
| N | 0.605758  | -0.076300 | 0.034859  | C | 5.157397  | -0.587670 | 0.465373  | N | 0.632379  | 0.047741  | 0.197326  | C | 5.288482  | -1.306707 | -0.095005 |
| N | 0.317732  | 1.293929  | -0.143685 | C | 4.773774  | 0.117631  | 1.529889  | N | 0.318145  | 1.322416  | -0.321382 | C | 5.028040  | -0.913356 | 1.200785  |
| C | -1.098527 | 1.372221  | -0.283730 | C | 0.894920  | 2.391638  | 0.424558  | C | -1.089032 | 1.304906  | -0.551235 | C | 1.303714  | 2.010295  | 0.775666  |
| O | -1.676203 | 2.459777  | -0.403718 | C | 1.085351  | 3.612258  | -0.461309 | O | -1.687088 | 2.306095  | -0.963111 | C | 1.598913  | 3.357130  | 0.135476  |
| N | -0.585871 | -2.143136 | 0.040307  | O | -1.587695 | 2.219478  | -1.145056 | N | -0.500003 | -2.005304 | 0.640484  | O | -1.217996 | 2.357616  | -0.697212 |
| H | 0.281541  | -2.658401 | 0.110169  | C | 0.023325  | 2.661098  | 1.645060  | H | 0.374402  | -2.452936 | 0.880644  | C | 0.476451  | 2.114055  | 2.051361  |
| H | -1.447989 | -2.637150 | -0.150978 | O | 2.153482  | -1.656923 | 0.604752  | H | -1.334648 | -2.566522 | 0.528938  | O | 2.218494  | -2.078804 | 0.096938  |
| C | 0.907887  | 2.127759  | 0.963082  | H | -5.734728 | -1.252524 | 1.567888  | C | 0.811158  | 2.421435  | 0.582939  | H | -5.584565 | -1.257246 | 1.411349  |
| C | 0.118042  | 1.981164  | 2.258073  | H | -6.784158 | -1.223374 | -0.671042 | C | -0.051202 | 2.548612  | 1.832936  | H | -6.676033 | -0.698748 | -0.735964 |
| C | 1.066809  | 3.571262  | 0.513675  | H | -5.426817 | -0.594458 | -2.667553 | C | 0.946077  | 3.722664  | -0.191396 | H | -5.314793 | 0.209512  | -2.618612 |
| H | 1.906401  | 1.709026  | 1.112361  | H | -3.025616 | -0.045790 | -2.388395 | H | 1.812291  | 2.097476  | 0.878716  | H | -2.869937 | 0.502234  | -2.328220 |
| H | 0.656166  | 2.482355  | 3.067132  | H | -2.401761 | 0.059123  | 2.366675  | H | 0.419768  | 3.251452  | 2.525451  | H | -2.135733 | -0.399901 | 2.326357  |
| H | 0.000376  | 0.926650  | 2.529685  | H | -2.790491 | -1.657050 | 2.526761  | H | -0.150636 | 1.584020  | 2.342175  | H | -2.665696 | -2.077084 | 2.156913  |
| H | -0.872906 | 2.437994  | 2.171585  | H | -3.981667 | -0.446952 | 3.000725  | H | -1.049531 | 2.925603  | 1.589118  | H | -3.738717 | -0.896464 | 2.906882  |
| H | 0.101542  | 4.070025  | 0.409108  | H | 0.284736  | -2.413125 | 1.166448  | H | -0.028559 | 4.135262  | -0.458384 | H | 0.300302  | -2.785926 | 0.546505  |
| H | 1.650929  | 4.107127  | 1.267213  | H | -1.421044 | -2.508118 | 0.790307  | H | 1.467087  | 4.449314  | 0.438380  | H | -1.414293 | -2.664366 | 0.219760  |
| H | 1.600346  | 3.625827  | -0.439599 | H | 1.880799  | 2.061752  | 0.762704  | H | 1.531121  | 3.574250  | -1.103576 | H | 2.257638  | 1.533254  | 1.014763  |
| C | 1.812948  | -0.574525 | -0.439821 | H | 0.509480  | 3.408891  | 2.277366  | C | 1.876846  | -0.502988 | -0.075982 | H | 1.040349  | 2.673961  | 2.802315  |
| O | 2.109160  | -1.749843 | -0.284390 | H | -0.114347 | 1.751069  | 2.238714  | O | 2.199840  | -1.586128 | 0.377667  | H | 0.258518  | 1.121342  | 2.459737  |
| S | 2.828651  | 0.606154  | -1.276250 | H | -0.958750 | 3.046217  | 1.352770  | S | 2.912307  | 0.504496  | -1.130170 | H | -0.467272 | 2.638248  | 1.870696  |
| C | 4.310343  | -0.416141 | -1.512186 | O | 0.129679  | 4.033591  | -0.778327 | C | 4.442222  | -0.352824 | -0.994529 | H | 0.683307  | 3.911712  | -0.078189 |
| C | 5.205981  | -0.576063 | -0.316668 | H | 1.625095  | 4.373635  | 0.108886  | C | 5.167525  | -0.487855 | 0.187932  | H | 2.204938  | 3.946769  | 0.829149  |
| C | 4.938062  | -0.238202 | 0.947789  | H | 1.675196  | 3.362630  | -1.347929 | C | 4.801773  | -0.019138 | 1.430642  | H | 2.162255  | 3.230690  | -0.793568 |
| H | 4.002708  | -1.393006 | -1.898332 | H | 4.194894  | -1.828641 | -1.019595 | H | 4.878406  | -3.298090 | -0.817969 | H | 4.852490  | -1.304799 | -2.209296 |
| H | 4.854494  | 0.086790  | -2.317838 | H | 5.087694  | -0.464049 | -1.680620 | H | 4.836523  | -0.723183 | -1.934078 | H | 6.150281  | -1.946354 | -0.275225 |
| H | 6.164913  | -1.033815 | -0.556104 | H | 6.089089  | -1.150684 | 0.497154  | H | 6.106385  | -1.031311 | 0.097471  | H | 5.669693  | -1.237022 | 2.011424  |
| H | 5.672473  | -0.404662 | 1.729180  | H | 5.388152  | 0.139484  | 2.424272  | H | 5.439773  | -0.188467 | 2.289689  | H | 4.195824  | -0.261439 | 1.450426  |
| H | 3.997366  | 0.222795  | 1.242353  | H | 3.855086  | 0.700226  | 1.546914  | H | 3.887143  | 0.544792  | 1.590154  |   |           |           |           |
| O | 4.439683  | -2.891077 | 0.952473  | O | 3.844579  | -3.278684 | -1.051806 | O | 4.015935  | -3.646198 | -0.556777 |   |           |           |           |
| H | 3.634650  | -2.564169 | 0.494906  | H | 3.148976  | -3.190255 | -0.367656 | H | 3.509437  | -2.867666 | -0.271923 |   |           |           |           |



| H41-Abs                                                                           |           |           |           |                                                                                    |           |           |           |                                                                                     |           |           |           |                                                                                     |           |           |           |
|-----------------------------------------------------------------------------------|-----------|-----------|-----------|------------------------------------------------------------------------------------|-----------|-----------|-----------|-------------------------------------------------------------------------------------|-----------|-----------|-----------|-------------------------------------------------------------------------------------|-----------|-----------|-----------|
| MCR                                                                               |           |           |           | TS                                                                                 |           |           |           | MCP                                                                                 |           |           |           | RAD                                                                                 |           |           |           |
| 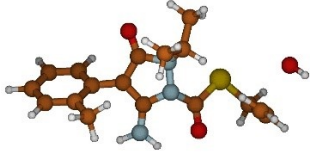 |           |           |           |  |           |           |           |  |           |           |           |  |           |           |           |
| C                                                                                 | -3.187201 | -0.153664 | -0.293213 | C                                                                                  | -1.016934 | 1.241579  | -0.370342 | C                                                                                   | -3.183242 | -0.087814 | -0.289231 | C                                                                                   | -0.734258 | 1.252689  | -0.419571 |
| C                                                                                 | -3.972224 | -0.595562 | 0.791505  | C                                                                                  | -1.702565 | 0.004177  | -0.175752 | C                                                                                   | -3.966860 | -0.554145 | 0.786277  | C                                                                                   | -1.389713 | 0.006472  | -0.184186 |
| C                                                                                 | -5.355205 | -0.721840 | 0.605291  | C                                                                                  | -0.763678 | -0.917676 | 0.244926  | C                                                                                   | -5.356474 | -0.618870 | 0.618966  | C                                                                                   | -0.410485 | -0.912001 | 0.140429  |
| C                                                                                 | -5.960773 | -0.406152 | -0.607998 | N                                                                                  | 0.485301  | -0.286025 | 0.349016  | C                                                                                   | -5.969102 | -0.219851 | -0.565847 | N                                                                                   | 0.837868  | -0.269947 | 0.143989  |
| C                                                                                 | -5.182496 | 0.053341  | -1.671753 | N                                                                                  | 0.359837  | 1.061852  | -0.050243 | C                                                                                   | -5.191101 | 0.263374  | -1.619290 | N                                                                                   | 0.666876  | 1.082125  | -0.223642 |
| C                                                                                 | -3.806362 | 0.174561  | -1.509981 | C                                                                                  | -3.141356 | -0.205296 | -0.416656 | C                                                                                   | -3.808960 | 0.324447  | -1.476798 | C                                                                                   | -2.842103 | -0.215514 | -0.301508 |
| C                                                                                 | -1.727507 | 0.015723  | -0.180031 | C                                                                                  | -4.004679 | -0.684889 | 0.589751  | C                                                                                   | -1.716750 | 0.021062  | -0.194232 | C                                                                                   | -3.610157 | -0.708394 | 0.773452  |
| C                                                                                 | -3.374114 | -0.912933 | 2.137935  | C                                                                                  | -5.363029 | -0.840738 | 0.283554  | C                                                                                   | -3.360591 | -0.961466 | 2.104671  | C                                                                                   | -4.987884 | -0.879757 | 0.584426  |
| H                                                                                 | -5.964768 | -1.060405 | 1.439452  | C                                                                                  | -5.870910 | -0.518598 | -0.972081 | H                                                                                   | -5.964937 | -0.976110 | 1.446128  | C                                                                                   | -5.605127 | -0.560047 | -0.621877 |
| H                                                                                 | -7.035841 | -0.509189 | -0.720198 | C                                                                                  | -5.016346 | -0.023363 | -1.958353 | H                                                                                   | -7.048995 | -0.276609 | -0.663508 | C                                                                                   | -4.844482 | -0.050561 | -1.675542 |
| H                                                                                 | -5.643282 | 0.310144  | -2.620504 | C                                                                                  | -3.662627 | 0.127807  | -1.677270 | H                                                                                   | -5.656975 | 0.584889  | -2.545553 | C                                                                                   | -3.473424 | 0.116175  | -1.511062 |
| H                                                                                 | -3.189622 | 0.521466  | -2.334946 | C                                                                                  | -3.516834 | -1.012705 | 1.977512  | H                                                                                   | -3.192788 | 0.688971  | -2.294520 | C                                                                                   | -3.000878 | -1.034613 | 2.112798  |
| H                                                                                 | -2.491747 | -0.298452 | 2.340260  | N                                                                                  | -0.900182 | -2.220498 | 0.480456  | H                                                                                   | -2.448552 | -0.396603 | 2.319413  | N                                                                                   | -0.517499 | -2.219181 | 0.366957  |
| H                                                                                 | -3.067657 | -1.962900 | 2.203167  | C                                                                                  | 1.676344  | -0.954163 | 0.072492  | H                                                                                   | -3.100751 | -2.025880 | 2.114750  | C                                                                                   | 2.008975  | -0.926895 | -0.225974 |
| H                                                                                 | -4.108705 | -0.738576 | 2.927811  | S                                                                                  | 2.878268  | 0.013952  | -0.807296 | H                                                                                   | -4.073422 | -0.792953 | 2.915487  | S                                                                                   | 3.129517  | 0.071189  | -1.204623 |
| C                                                                                 | -0.783778 | -0.932026 | 0.166501  | C                                                                                  | 4.244159  | -1.168386 | -0.732954 | C                                                                                   | -0.805176 | -0.974859 | 0.097469  | C                                                                                   | 4.545244  | -0.973607 | -1.224046 |
| N                                                                                 | 0.488097  | -0.340209 | 0.153967  | C                                                                                  | 4.959014  | -1.322161 | 0.563401  | N                                                                                   | 0.487744  | -0.429067 | 0.088537  | C                                                                                   | 5.288355  | -1.306609 | -0.095366 |
| N                                                                                 | 0.368918  | 1.008092  | -0.246340 | C                                                                                  | 4.712118  | -0.658647 | 1.694790  | N                                                                                   | 0.415455  | 0.939253  | -0.250167 | C                                                                                   | 5.027843  | -0.914018 | 1.200732  |
| C                                                                                 | -1.023985 | 1.229200  | -0.445778 | C                                                                                  | 0.917410  | 1.997441  | 0.988875  | C                                                                                   | -0.971734 | 1.217851  | -0.422286 | C                                                                                   | 1.303667  | 2.010097  | 0.775999  |
| O                                                                                 | -1.463570 | 2.345661  | -0.750850 | C                                                                                  | 1.279707  | 3.333870  | 0.361343  | O                                                                                   | -1.372451 | 2.360361  | -0.677488 | C                                                                                   | 1.598661  | 3.357233  | 0.136309  |
| N                                                                                 | -0.941849 | -2.227785 | 0.428223  | O                                                                                  | -1.462665 | 2.346408  | -0.705769 | N                                                                                   | -1.005768 | -2.274113 | 0.307249  | O                                                                                   | -1.217736 | 2.357586  | -0.697617 |
| H                                                                                 | -0.142725 | -2.821253 | 0.606624  | C                                                                                  | -0.015785 | 2.125224  | 2.186943  | H                                                                                   | -0.226637 | -2.903080 | 0.449322  | C                                                                                   | 0.476418  | 2.113297  | 2.051753  |
| H                                                                                 | -1.852723 | -2.643757 | 0.283055  | O                                                                                  | 1.851478  | -2.108049 | 0.416094  | H                                                                                   | -1.932838 | -2.651240 | 0.158066  | O                                                                                   | 2.218351  | -2.078869 | 0.096469  |
| C                                                                                 | 1.044068  | 1.933681  | 0.729669  | H                                                                                  | -6.032688 | -1.207709 | 1.057438  | C                                                                                   | 1.129098  | 1.796603  | 0.761960  | H                                                                                   | -5.584462 | -1.257568 | 1.411110  |
| C                                                                                 | 0.225058  | 2.097116  | 2.004439  | H                                                                                  | -6.929734 | -0.644417 | -1.177029 | C                                                                                   | 0.323249  | 1.933631  | 2.048023  | H                                                                                   | -6.675944 | -0.698888 | -0.736161 |

|   |           |           |           |   |           |           |           |   |           |           |           |   |           |           |           |
|---|-----------|-----------|-----------|---|-----------|-----------|-----------|---|-----------|-----------|-----------|---|-----------|-----------|-----------|
| C | 1.387647  | 3.254131  | 0.059405  | H | -5.400445 | 0.238686  | -2.939250 | C | 1.516839  | 3.131213  | 0.146280  | H | -5.314809 | 0.209873  | -2.618595 |
| H | 1.980104  | 1.426356  | 0.977384  | H | -2.986998 | 0.503813  | -2.441014 | H | 2.048201  | 1.246825  | 0.980925  | H | -2.869963 | 0.502725  | -2.328185 |
| H | 0.810818  | 2.653224  | 2.741355  | H | -2.669386 | -0.383147 | 2.264806  | H | 0.932549  | 2.437093  | 2.803418  | H | -2.135718 | -0.399858 | 2.326277  |
| H | -0.027833 | 1.122668  | 2.435929  | H | -3.193533 | -2.057061 | 2.051529  | H | 0.038585  | 0.951181  | 2.439804  | H | -2.665798 | -2.077026 | 2.157065  |
| H | -0.699425 | 2.651091  | 1.813280  | H | -4.320317 | -0.868230 | 2.703799  | H | -0.582181 | 2.527187  | 1.887063  | H | -3.738775 | -0.896215 | 2.906742  |
| H | 0.492632  | 3.838184  | -0.162992 | H | -0.102992 | -2.789273 | 0.732697  | H | 0.642884  | 3.756728  | -0.044769 | H | 0.300524  | -2.785602 | 0.546881  |
| H | 2.018538  | 3.835151  | 0.738052  | H | -1.781420 | -2.663960 | 0.255698  | H | 2.172429  | 3.658763  | 0.844957  | H | -1.414234 | -2.664452 | 0.220499  |
| H | 1.941785  | 3.086487  | -0.868630 | H | 1.842611  | 1.514998  | 1.314982  | H | 2.060069  | 2.983168  | -0.791589 | H | 2.257702  | 1.533150  | 1.014850  |
| C | 1.632182  | -1.049030 | -0.213233 | H | 0.486858  | 2.689261  | 2.977245  | C | 1.604739  | -1.163112 | -0.295890 | H | 1.039979  | 2.673477  | 2.802757  |
| O | 1.792923  | -2.206441 | 0.129804  | H | -0.279257 | 1.139991  | 2.586383  | O | 1.731412  | -2.333552 | 0.002550  | H | 0.259042  | 1.120444  | 2.460077  |
| S | 2.790481  | -0.133787 | -1.193189 | H | -0.934382 | 2.656359  | 1.918431  | S | 2.793067  | -0.228098 | -1.258281 | H | -0.467597 | 2.636979  | 1.871104  |
| C | 4.135333  | -1.351312 | -1.207032 | H | 0.391045  | 3.896716  | 0.069777  | C | 4.171550  | -1.317642 | -1.211161 | H | 0.683076  | 3.912337  | -0.076091 |
| C | 4.923138  | -1.484809 | 0.063918  | H | 1.834872  | 3.923689  | 1.096244  | C | 4.828838  | -1.707854 | -0.046691 | H | 2.205615  | 3.946190  | 0.829756  |
| C | 4.670455  | -0.902166 | 1.241217  | H | 1.914621  | 3.191977  | -0.517950 | C | 4.506463  | -1.334396 | 1.241487  | H | 2.161068  | 3.231182  | -0.793354 |
| H | 3.725962  | -2.320901 | -1.505269 | H | 3.949911  | -2.126827 | -1.169152 | H | 4.536141  | -1.627979 | -2.183719 | H | 4.852959  | -1.303628 | -2.209664 |
| H | 4.792077  | -1.019480 | -2.017670 | H | 4.981274  | -0.736813 | -1.517397 | H | 5.899625  | 1.133806  | -0.699089 | H | 6.150294  | -1.946047 | -0.275674 |
| H | 5.780578  | -2.150655 | -0.028573 | H | 5.754543  | -2.065475 | 0.535120  | H | 5.678361  | -2.372326 | -0.191300 | H | 5.669745  | -1.237952 | 2.011066  |
| H | 5.313666  | -1.088728 | 2.095638  | H | 5.298775  | -0.856230 | 2.586215  | H | 5.087176  | -1.701737 | 2.079268  | H | 4.195468  | -0.262534 | 1.450980  |
| H | 3.823135  | -0.237514 | 1.393717  | H | 3.922453  | 0.085227  | 1.773887  | H | 3.681799  | -0.661745 | 1.462446  |   |           |           |           |
| O | 6.031869  | 0.908510  | -0.072648 | O | 5.859837  | 0.105928  | -2.342931 | O | 5.814258  | 1.600683  | 0.143222  |   |           |           |           |
| H | 6.735995  | 0.595550  | 0.527505  | H | 6.313951  | 0.552731  | -1.600560 | H | 5.588701  | 0.905734  | 0.777643  |   |           |           |           |

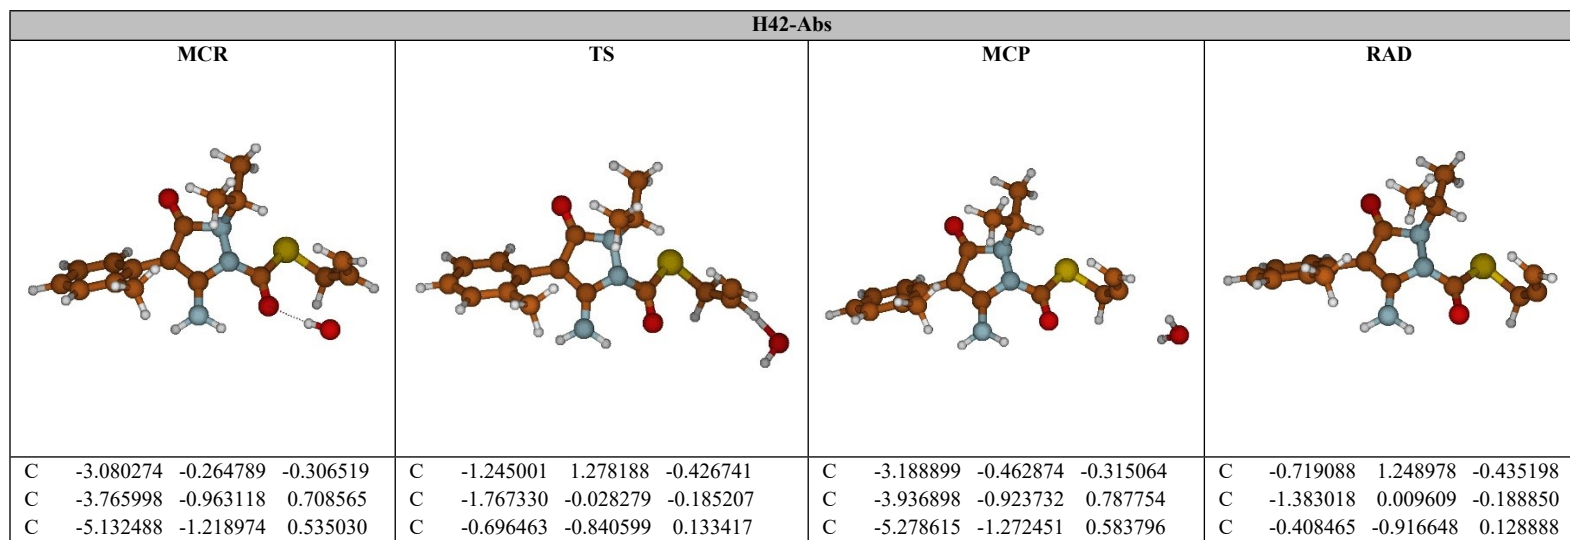



|   |           |           |           |   |           |           |           |   |           |           |           |   |           |           |           |
|---|-----------|-----------|-----------|---|-----------|-----------|-----------|---|-----------|-----------|-----------|---|-----------|-----------|-----------|
| C | -5.818556 | -0.786570 | -0.596723 | N | 0.477861  | -0.073032 | 0.132654  | C | -5.882195 | -1.156390 | -0.665309 | N | 0.844742  | -0.285994 | 0.119085  |
| C | -5.140487 | -0.075709 | -1.588341 | N | 0.167301  | 1.252706  | -0.240057 | C | -5.144059 | -0.677810 | -1.749120 | N | 0.682352  | 1.066630  | -0.251614 |
| C | -3.781116 | 0.178367  | -1.439610 | C | -3.189569 | -0.398301 | -0.291344 | C | -3.807681 | -0.337178 | -1.569424 | C | -2.838425 | -0.199972 | -0.289543 |
| C | -1.646241 | 0.056419  | -0.197506 | C | -3.889419 | -0.985674 | 0.782731  | C | -1.776389 | -0.062662 | -0.188123 | C | -3.598839 | -0.679626 | 0.796776  |
| C | -3.080913 | -1.419361 | 1.971029  | C | -5.243815 | -1.297406 | 0.604496  | C | -3.347126 | -1.031929 | 2.170540  | C | -4.979971 | -0.840075 | 0.623957  |
| H | -5.665687 | -1.755077 | 1.316232  | C | -5.905535 | -1.024255 | -0.589539 | H | -5.859512 | -1.626048 | 1.432071  | C | -5.607622 | -0.522124 | -0.577500 |
| H | -6.879115 | -0.995091 | -0.700085 | C | -5.214737 | -0.420764 | -1.641672 | H | -6.925822 | -1.428731 | -0.790310 | C | -4.854245 | -0.025733 | -1.642546 |
| H | -5.665217 | 0.273283  | -2.472219 | C | -3.866736 | -0.114542 | -1.488375 | H | -5.604566 | -0.575137 | -2.726744 | C | -3.480030 | 0.130000  | -1.494103 |
| H | -3.241411 | 0.721968  | -2.210615 | C | -3.234685 | -1.266096 | 2.110832  | H | -3.221110 | 0.026706  | -2.408876 | C | -2.976972 | -1.002666 | 2.131066  |
| H | -2.271917 | -0.740141 | 2.256329  | N | -0.667463 | -2.152136 | 0.359506  | H | -2.564551 | -0.284986 | 2.333761  | N | -0.525354 | -2.222060 | 0.360326  |
| H | -2.646837 | -2.418510 | 1.852555  | C | 1.710078  | -0.604174 | -0.241837 | H | -2.903415 | -2.019330 | 2.340489  | C | 2.008408  | -0.950917 | -0.263614 |
| H | -3.799103 | -1.470885 | 2.792817  | S | 2.726555  | 0.486509  | -1.205015 | H | -4.125681 | -0.891019 | 2.924245  | S | 3.133714  | 0.021743  | -1.231110 |
| C | -0.588325 | -0.813563 | -0.019821 | C | 4.235561  | -0.526383 | -1.219867 | C | -0.713324 | -0.812091 | 0.277699  | C | 4.553328  | -1.154568 | -1.209555 |
| N | 0.605792  | -0.076408 | 0.034715  | C | 4.981822  | -0.553726 | 0.075835  | N | 0.452892  | -0.032991 | 0.230150  | C | 5.203634  | -1.243357 | 0.099651  |
| N | 0.317856  | 1.293893  | -0.143727 | C | 4.701316  | -0.052379 | 1.269481  | N | 0.146319  | 1.231638  | -0.316663 | C | 5.075097  | -0.816751 | 1.333238  |
| C | -1.098449 | 1.372260  | -0.283780 | C | 0.711797  | 2.248348  | 0.749001  | C | -1.255621 | 1.211111  | -0.569571 | C | 1.335427  | 1.991503  | 0.740524  |
| O | -1.676027 | 2.459868  | -0.403703 | C | 0.866351  | 3.612535  | 0.095934  | O | -1.847760 | 2.207282  | -1.003739 | C | 1.637431  | 3.333981  | 0.094479  |
| N | -0.585943 | -2.143146 | 0.039646  | O | -1.841910 | 2.327103  | -0.701712 | N | -0.680297 | -2.083323 | 0.671900  | O | -1.195209 | 2.357255  | -0.713075 |
| H | 0.281327  | -2.658536 | 0.110240  | C | -0.115931 | 2.279708  | 2.028206  | H | 0.193132  | -2.525195 | 0.926410  | C | 0.519245  | 2.105963  | 2.022397  |
| H | -1.448238 | -2.637139 | -0.150837 | O | 2.036426  | -1.731933 | 0.078633  | H | -1.508998 | -2.650119 | 0.545793  | O | 2.208550  | -2.108684 | 0.054022  |
| C | 0.907880  | 2.127411  | 0.963382  | H | -5.787433 | -1.748920 | 1.430680  | C | 0.632045  | 2.346724  | 0.570181  | H | -5.570735 | -1.207601 | 1.459398  |
| C | 0.117895  | 1.980450  | 2.258234  | H | -6.957409 | -1.271984 | -0.695144 | C | -0.247792 | 2.504294  | 1.804485  | H | -6.680800 | -0.652238 | -0.679195 |
| C | 1.066887  | 3.571042  | 0.514428  | H | -5.720765 | -0.195157 | -2.575191 | C | 0.785535  | 3.630936  | -0.228698 | H | -5.332660 | 0.233118  | -2.581969 |
| H | 1.906376  | 1.708622  | 1.112630  | H | -3.317167 | 0.345937  | -2.305083 | H | 1.627113  | 2.023448  | 0.887097  | H | -2.882189 | 0.506181  | -2.320157 |
| H | 0.655965  | 2.481355  | 3.067506  | H | -2.439653 | -0.546292 | 2.327060  | H | 0.216691  | 3.218086  | 2.490164  | H | -2.107514 | -0.369870 | 2.332761  |
| H | 0.000134  | 0.925860  | 2.529514  | H | -2.790184 | -2.267317 | 2.134808  | H | -0.360617 | 1.550426  | 2.330888  | H | -2.644475 | -2.045841 | 2.176253  |
| H | -0.873018 | 2.437370  | 2.171800  | H | -3.974795 | -1.218806 | 2.913295  | H | -1.240129 | 2.881687  | 1.538006  | H | -3.706053 | -0.858523 | 2.932073  |
| H | 0.101657  | 4.069894  | 0.409943  | H | 0.208165  | -2.631662 | 0.520806  | H | -0.182670 | 4.041911  | -0.520523 | H | 0.289588  | -2.795165 | 0.532929  |
| H | 1.650962  | 4.106654  | 1.268184  | H | -1.510315 | -2.688618 | 0.199181  | H | 1.299354  | 4.368652  | 0.394113  | H | -1.427891 | -2.659283 | 0.225783  |
| H | 1.600514  | 3.625877  | -0.438780 | H | 1.710111  | 1.872622  | 0.987509  | H | 1.384859  | 3.460851  | -1.127774 | H | 2.286807  | 1.506376  | 0.973596  |
| C | 1.812994  | -0.574637 | -0.440078 | H | 0.393224  | 2.898449  | 2.772038  | C | 1.704878  | -0.587315 | -0.027900 | H | 1.093796  | 2.663356  | 2.767131  |
| O | 2.109196  | -1.749949 | -0.284656 | H | -0.232815 | 1.273419  | 2.444627  | O | 2.030456  | -1.661413 | 0.442765  | H | 0.296469  | 1.116328  | 2.435596  |
| S | 2.828578  | 0.606155  | -1.276456 | H | -1.107642 | 2.706464  | 1.848613  | S | 2.745738  | 0.391572  | -1.080876 | H | -0.421538 | 2.637443  | 1.847788  |
| C | 4.310475  | -0.415878 | -1.512223 | H | -0.101805 | 4.068887  | -0.118523 | C | 4.292109  | -0.586558 | -0.868009 | H | 0.724865  | 3.895202  | -0.114998 |
| C | 5.205987  | -0.575649 | -0.316553 | H | 1.411547  | 4.267126  | 0.781794  | C | 4.889429  | -0.425194 | 0.460450  | H | 2.252675  | 3.920886  | 0.782345  |
| C | 4.937729  | -0.238014 | 0.947895  | H | 1.436397  | 3.536084  | -0.834488 | C | 4.666906  | 0.131654  | 1.626450  | H | 2.193603  | 3.200212  | -0.837869 |
| H | 4.003067  | -1.392822 | -1.898322 | H | 3.979383  | -1.541011 | -1.536619 | H | 4.073760  | -1.635105 | -1.086054 | H | 4.198677  | -2.130254 | -1.550200 |
| H | 4.854655  | 0.087171  | -2.317769 | H | 4.857060  | -0.084705 | -2.005010 | H | 4.957330  | -0.205025 | -1.648667 | H | 5.237510  | -0.755996 | -1.964721 |
| H | 6.165058  | -1.033117 | -0.555945 | H | 5.985188  | -1.142781 | -0.031916 | H | 6.953984  | -1.608484 | -0.074143 | H | 5.779929  | -1.094107 | 2.113792  |
| H | 5.672004  | -0.404393 | 1.729430  | H | 5.376588  | -0.200854 | 2.106599  | H | 5.372530  | 0.041219  | 2.449179  | H | 4.246236  | -0.162283 | 1.624867  |
| H | 3.996883  | 0.222780  | 1.242294  | H | 3.796862  | 0.527416  | 1.452932  | H | 3.756367  | 0.710278  | 1.815962  |   |           |           |           |
| O | 4.439793  | -2.890880 | 0.952756  | O | 7.027123  | -2.085711 | -0.027485 | O | 7.354879  | -2.226517 | -0.702316 |   |           |           |           |

|   |          |           |          |   |          |           |          |   |          |           |           |
|---|----------|-----------|----------|---|----------|-----------|----------|---|----------|-----------|-----------|
| H | 3.635071 | -2.564405 | 0.494332 | H | 6.517351 | -2.848090 | 0.309968 | H | 6.643320 | -2.432520 | -1.323281 |
|---|----------|-----------|----------|---|----------|-----------|----------|---|----------|-----------|-----------|

| H43-Abs                                                                           |           |           |                                                                                    |   |           |                                                                                     |           |   |                                                                                     |           |           |   |           |           |           |
|-----------------------------------------------------------------------------------|-----------|-----------|------------------------------------------------------------------------------------|---|-----------|-------------------------------------------------------------------------------------|-----------|---|-------------------------------------------------------------------------------------|-----------|-----------|---|-----------|-----------|-----------|
| MCR                                                                               |           |           | TS                                                                                 |   |           | MCP                                                                                 |           |   | RAD                                                                                 |           |           |   |           |           |           |
| 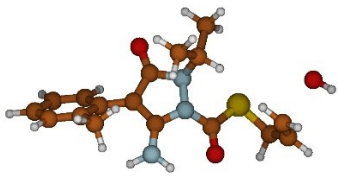 |           |           |  |   |           |  |           |   |  |           |           |   |           |           |           |
| C                                                                                 | -3.185922 | -0.153258 | -0.293775                                                                          | C | -1.174919 | 1.307941                                                                            | -0.305069 | C | -3.253105                                                                           | -0.294284 | -0.189212 | C | -0.713323 | 1.237626  | -0.450021 |
| C                                                                                 | -3.973292 | -0.593752 | 0.789771                                                                           | C | -1.770324 | 0.018657                                                                            | -0.158177 | C | -3.881890                                                                           | -1.039073 | 0.829745  | C | -1.380517 | 0.005328  | -0.177456 |
| C                                                                                 | -5.355882 | -0.720273 | 0.600706                                                                           | C | -0.739264 | -0.891732                                                                           | -0.029722 | C | -5.257961                                                                           | -1.281070 | 0.726022  | C | -0.410279 | -0.909523 | 0.183691  |
| C                                                                                 | -5.958829 | -0.406128 | -0.614267                                                                          | N | 0.484685  | -0.206658                                                                           | -0.063366 | C | -6.007601                                                                           | -0.790504 | -0.339789 | N | 0.842830  | -0.278774 | 0.173075  |
| C                                                                                 | -5.178236 | 0.052030  | -1.676918                                                                          | N | 0.241922  | 1.170109                                                                            | -0.257114 | C | -5.385384                                                                           | -0.033444 | -1.333784 | N | 0.684647  | 1.060887  | -0.242674 |
| C                                                                                 | -3.802471 | 0.173428  | -1.512310                                                                          | C | -3.220214 | -0.244486                                                                           | -0.175729 | C | -4.017876                                                                           | 0.207743  | -1.254515 | C | -2.833506 | -0.209803 | -0.299186 |
| C                                                                                 | -1.726394 | 0.015962  | -0.178018                                                                          | C | -3.874408 | -0.892460                                                                           | 0.892114  | C | -1.812448                                                                           | 0.013036  | -0.153240 | C | -3.613923 | -0.662564 | 0.784370  |
| C                                                                                 | -3.378266 | -0.909506 | 2.137961                                                                           | C | -5.257995 | -1.094122                                                                           | 0.802202  | C | -3.125851                                                                           | -1.560170 | 2.024749  | C | -4.991305 | -0.830253 | 0.589421  |
| H                                                                                 | -5.967242 | -1.057801 | 1.433974                                                                           | C | -5.990194 | -0.656260                                                                           | -0.298016 | H | -5.747163                                                                           | -1.853318 | 1.510382  | C | -5.596436 | -0.544670 | -0.631494 |
| H                                                                                 | -7.033650 | -0.509315 | -0.728667                                                                          | C | -5.342059 | 0.005390                                                                            | -1.342300 | H | -7.073721                                                                           | -0.990058 | -0.389652 | C | -4.823452 | -0.074628 | -1.694499 |
| H                                                                                 | -5.636948 | 0.307639  | -2.626995                                                                          | C | -3.967168 | 0.204983                                                                            | -1.276577 | H | -5.959738                                                                           | 0.361236  | -2.166101 | C | -3.452597 | 0.087501  | -1.523931 |
| H                                                                                 | -3.183947 | 0.519250  | -2.336394                                                                          | C | -3.137758 | -1.354195                                                                           | 2.123198  | H | -3.521370                                                                           | 0.786778  | -2.028729 | C | -3.017649 | -0.949337 | 2.138503  |
| H                                                                                 | -2.494973 | -0.296512 | 2.340665                                                                           | N | -0.787735 | -2.219230                                                                           | 0.055349  | H | -2.291135                                                                           | -0.903962 | 2.288812  | N | -0.530327 | -2.207202 | 0.455033  |
| H                                                                                 | -3.074311 | -1.960033 | 2.205940                                                                           | C | 1.632850  | -0.768420                                                                           | -0.619754 | H | -2.714241                                                                           | -2.557666 | 1.834487  | C | 2.009595  | -0.955738 | -0.182399 |
| H                                                                                 | -4.113934 | -0.731924 | 2.926123                                                                           | S | 2.630309  | 0.358879                                                                            | -1.558055 | H | -3.792212                                                                           | -1.641034 | 2.886852  | S | 3.136393  | -0.018955 | -1.179826 |
| C                                                                                 | -0.783562 | -0.931578 | 0.171590                                                                           | C | 4.050786  | -0.733033                                                                           | -1.842442 | C | -0.753980                                                                           | -0.872234 | -0.084131 | C | 4.530500  | -1.178577 | -1.147583 |
| N                                                                                 | 0.488679  | -0.340454 | 0.159494                                                                           | C | 4.948855  | -0.973132                                                                           | -0.658299 | N | 0.448193                                                                            | -0.149877 | -0.068082 | C | 5.286956  | -1.249696 | 0.161501  |
| N                                                                                 | 0.370583  | 1.007049  | -0.243744                                                                          | C | 4.759037  | -0.550590                                                                           | 0.581785  | N | 0.164056                                                                            | 1.228917  | -0.169399 | C | 4.981443  | -0.651239 | 1.288872  |
| C                                                                                 | -1.021942 | 1.228657  | -0.444905                                                                          | C | 0.944939  | 2.005542                                                                            | 0.778904  | C | -1.256465                                                                           | 1.326718  | -0.212115 | C | 1.329862  | 2.016616  | 0.724193  |
| O                                                                                 | -1.460576 | 2.344884  | -0.752259                                                                          | C | 1.143806  | 3.424079                                                                            | 0.269656  | O | -1.827743                                                                           | 2.424646  | -0.242912 | C | 1.638017  | 3.338367  | 0.039303  |
| N                                                                                 | -0.942455 | -2.226741 | 0.435710                                                                           | O | -1.713571 | 2.417961                                                                            | -0.406991 | N | -0.762094                                                                           | -2.203482 | -0.088814 | O | -1.185902 | 2.337388  | -0.766466 |
| H                                                                                 | -0.143732 | -2.820143 | 0.616146                                                                           | C | 0.237538  | 1.939255                                                                            | 2.127219  | H | 0.103140                                                                            | -2.727169 | -0.098789 | C | 0.502409  | 2.171348  | 1.994574  |
| H                                                                                 | -1.853307 | -2.642728 | 0.290508                                                                           | O | 1.901818  | -1.944690                                                                           | -0.458592 | H | -1.638724                                                                           | -2.681797 | -0.251346 | O | 2.206516  | -2.102505 | 0.175796  |
| C                                                                                 | 1.046087  | 1.934099  | 0.730525                                                                           | H | -5.766472 | -1.591847                                                                           | 1.624212  | C | 0.840767                                                                            | 2.011300  | 0.924093  | H | -5.597282 | -1.177281 | 1.422729  |

|   |           |           |           |   |           |           |           |   |           |           |           |   |           |           |           |
|---|-----------|-----------|-----------|---|-----------|-----------|-----------|---|-----------|-----------|-----------|---|-----------|-----------|-----------|
| C | 0.226717  | 2.100574  | 2.004651  | H | -7.062503 | -0.822446 | -0.336228 | C | 0.139307  | 1.823933  | 2.264032  | H | -6.667294 | -0.679396 | -0.750249 |
| C | 1.390650  | 3.253024  | 0.057760  | H | -5.902148 | 0.358312  | -2.202605 | C | 0.990641  | 3.469400  | 0.520884  | H | -5.284118 | 0.159042  | -2.649267 |
| H | 1.981744  | 1.426582  | 0.979431  | H | -3.451093 | 0.710163  | -2.088770 | H | 1.840711  | 1.573969  | 0.987387  | H | -2.839781 | 0.443458  | -2.347962 |
| H | 0.812523  | 2.657730  | 2.740736  | H | -2.275761 | -0.715917 | 2.338978  | H | 0.740042  | 2.283725  | 3.053412  | H | -2.151365 | -0.311960 | 2.339338  |
| H | -0.027040 | 1.127139  | 2.437909  | H | -2.769689 | -2.379905 | 2.007563  | H | 0.022127  | 0.760948  | 2.500630  | H | -2.687419 | -1.991145 | 2.218126  |
| H | -0.697304 | 2.654802  | 1.811980  | H | -3.804896 | -1.343113 | 2.988485  | H | -0.847195 | 2.298171  | 2.264529  | H | -3.761551 | -0.783127 | 2.921408  |
| H | 0.496048  | 3.837209  | -0.165971 | H | 0.060312  | -2.769470 | 0.085223  | H | 0.028131  | 3.983787  | 0.500779  | H | 0.283574  | -2.774588 | 0.650279  |
| H | 2.021753  | 3.834970  | 0.735417  | H | -1.680712 | -2.679620 | -0.064549 | H | 1.631965  | 3.968232  | 1.253057  | H | -1.428885 | -2.650189 | 0.313134  |
| H | 1.944894  | 3.083231  | -0.869819 | H | 1.929272  | 1.540224  | 0.877188  | H | 1.459795  | 3.555072  | -0.463444 | H | 2.279068  | 1.538586  | 0.980447  |
| C | 1.632182  | -1.050709 | -0.207284 | H | 0.854885  | 2.431785  | 2.883315  | C | 1.615730  | -0.638862 | -0.652065 | H | 1.070300  | 2.751178  | 2.727189  |
| O | 1.792565  | -2.207450 | 0.138191  | H | 0.082363  | 0.900498  | 2.438060  | O | 1.920003  | -1.814452 | -0.563431 | H | 0.274885  | 1.195010  | 2.435867  |
| S | 2.789683  | -0.138163 | -1.190474 | H | -0.731116 | 2.447535  | 2.092077  | S | 2.578884  | 0.573940  | -1.515687 | H | -0.436265 | 2.697667  | 1.794672  |
| C | 4.131734  | -1.358646 | -1.207938 | H | 0.197779  | 3.964293  | 0.200985  | C | 4.046755  | -0.443536 | -1.830266 | H | 0.727701  | 3.894575  | -0.192282 |
| C | 4.925506  | -1.490264 | 0.059386  | H | 1.794922  | 3.956869  | 0.968491  | C | 4.922888  | -0.711458 | -0.626335 | H | 2.250467  | 3.944874  | 0.712523  |
| C | 4.679673  | -0.904382 | 1.236479  | H | 1.622583  | 3.420135  | -0.713807 | C | 4.677049  | -0.387097 | 0.621486  | H | 2.199173  | 3.175526  | -0.885352 |
| H | 3.718621  | -2.328022 | -1.501760 | H | 3.692659  | -1.684684 | -2.244018 | H | 3.737315  | -1.385767 | -2.290136 | H | 4.175189  | -2.171652 | -1.435165 |
| H | 4.785193  | -1.030366 | -2.022661 | H | 4.619078  | -0.240431 | -2.637979 | H | 4.613864  | 0.116752  | -2.580010 | H | 5.197990  | -0.826697 | -1.940405 |
| H | 5.782773  | -2.156024 | -0.036199 | H | 5.828535  | -1.572961 | -0.891907 | H | 5.845810  | -1.242961 | -0.871279 | H | 6.172404  | -1.887745 | 0.114275  |
| H | 5.327305  | -1.088795 | 2.087949  | H | 5.557006  | -0.867192 | 1.397779  | H | 6.540565  | -1.224457 | 1.837251  | H | 4.221185  | 0.009154  | 1.688080  |
| H | 3.832540  | -0.240159 | 1.392090  | H | 3.953260  | 0.066623  | 0.973960  | H | 3.916846  | 0.104972  | 1.215634  |   |           |           |           |
| O | 6.003185  | 0.936478  | -0.060551 | O | 6.680623  | -1.012095 | 2.128422  | O | 7.458535  | -1.512557 | 1.725996  |   |           |           |           |
| H | 6.782503  | 0.517938  | 0.353427  | H | 7.182675  | -0.254369 | 1.771665  | H | 7.602139  | -1.480881 | 0.770756  |   |           |           |           |

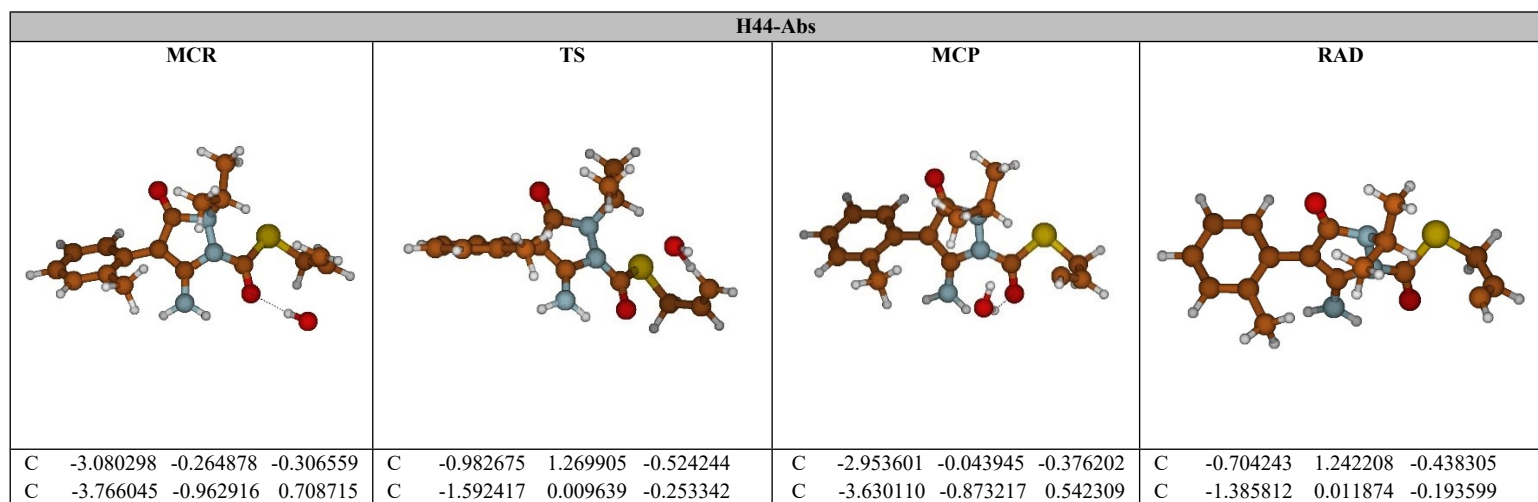

|   |           |           |           |   |           |           |           |   |           |           |           |   |           |           |           |
|---|-----------|-----------|-----------|---|-----------|-----------|-----------|---|-----------|-----------|-----------|---|-----------|-----------|-----------|
| C | -5.132532 | -1.218792 | 0.535230  | C | -0.574210 | -0.883124 | 0.021382  | C | -5.019697 | -1.004591 | 0.422637  | C | -0.422834 | -0.931175 | 0.111419  |
| C | -5.818565 | -0.786688 | -0.596667 | N | 0.654134  | -0.210663 | -0.039781 | C | -5.735514 | -0.326210 | -0.560464 | N | 0.838006  | -0.319924 | 0.093218  |
| C | -5.140470 | -0.076127 | -1.588475 | N | 0.431955  | 1.139207  | -0.395038 | C | -5.064497 | 0.512036  | -1.452144 | N | 0.694846  | 1.035887  | -0.270886 |
| C | -3.781091 | 0.177972  | -1.439787 | C | -3.042602 | -0.249827 | -0.295253 | C | -3.683264 | 0.646564  | -1.356880 | C | -2.844627 | -0.175915 | -0.286633 |
| C | -1.646271 | 0.056379  | -0.197520 | C | -3.741597 | -0.749935 | 0.822639  | C | -1.495758 | 0.159453  | -0.309764 | C | -3.605012 | -0.658059 | 0.798569  |
| C | -3.080923 | -1.418800 | 1.971283  | C | -5.121890 | -0.959896 | 0.706328  | C | -2.909086 | -1.599582 | 1.648890  | C | -4.989094 | -0.799040 | 0.631973  |
| H | -5.665765 | -1.754665 | 1.316567  | C | -5.808230 | -0.669754 | -0.469867 | H | -5.545954 | -1.641441 | 1.129367  | C | -5.619587 | -0.459344 | -0.561957 |
| H | -6.879125 | -0.995221 | -0.699992 | C | -5.116349 | -0.152009 | -1.565936 | H | -6.812990 | -0.444110 | -0.624447 | C | -4.865991 | 0.039820  | -1.625637 |
| H | -5.665185 | 0.272623  | -2.472457 | C | -3.743478 | 0.052005  | -1.473796 | H | -5.611800 | 1.052243  | -2.218329 | C | -3.489139 | 0.176173  | -1.483542 |
| H | -3.241355 | 0.721368  | -2.210916 | C | -3.054597 | -1.043766 | 2.131454  | H | -3.149303 | 1.288753  | -2.052356 | C | -2.980396 | -1.004693 | 2.125699  |
| H | -2.272449 | -0.739039 | 2.256785  | N | -0.643975 | -2.191205 | 0.260430  | H | -2.037553 | -1.037113 | 1.997715  | N | -0.556681 | -2.236693 | 0.335111  |
| H | -2.646108 | -2.417626 | 1.852804  | C | 1.834181  | -0.838863 | -0.423952 | H | -2.556236 | -2.583513 | 1.319714  | C | 1.997748  | -0.999532 | -0.271817 |
| H | -3.799242 | -1.470892 | 2.792920  | S | 2.974269  | 0.186701  | -1.312519 | H | -3.581266 | -1.760834 | 2.494996  | S | 3.129977  | -0.061461 | -1.262947 |
| C | -0.588349 | -0.813588 | -0.019768 | C | 4.301248  | -1.029216 | -1.546806 | C | -0.497909 | -0.795985 | -0.365643 | C | 4.572773  | -1.149198 | -1.086043 |
| N | 0.605741  | -0.076433 | 0.034801  | C | 5.184963  | -1.326362 | -0.370615 | N | 0.743778  | -0.159915 | -0.249031 | C | 5.199780  | -1.117601 | 0.283672  |
| N | 0.317802  | 1.293845  | -0.143740 | C | 5.031958  | -1.023345 | 0.908529  | N | 0.557640  | 1.233141  | -0.133597 | C | 4.745513  | -0.464648 | 1.329009  |
| C | -1.098482 | 1.372205  | -0.283836 | C | 1.073696  | 2.083394  | 0.586973  | C | -0.855864 | 1.427962  | -0.177349 | C | 1.377134  | 1.942986  | 0.717983  |
| O | -1.676071 | 2.459816  | -0.403846 | C | 1.220072  | 3.470759  | -0.018318 | O | -1.354062 | 2.554278  | -0.054421 | C | 1.696082  | 3.283115  | 0.075731  |
| N | -0.585968 | -2.143172 | 0.039627  | O | -1.510496 | 2.359521  | -0.783054 | N | -0.590536 | -2.105720 | -0.580885 | O | -1.165294 | 2.360309  | -0.704315 |
| H | 0.281248  | -2.658579 | 0.110688  | C | 0.344062  | 2.079240  | 1.924410  | H | 0.230268  | -2.696305 | -0.569711 | C | 0.577061  | 2.065450  | 2.009277  |
| H | -1.448301 | -2.637154 | -0.150711 | O | 2.044405  | -2.010661 | -0.163967 | H | -1.501441 | -2.508433 | -0.757696 | O | 2.185215  | -2.152347 | 0.073223  |
| C | 0.907886  | 2.127514  | 0.963194  | H | -5.664976 | -1.344106 | 1.566243  | C | 1.234403  | 1.764769  | 1.105210  | H | -5.579646 | -1.168713 | 1.466632  |
| C | 0.117964  | 1.980766  | 2.258112  | H | -6.879330 | -0.838126 | -0.527714 | C | 0.466036  | 1.394088  | 2.368396  | H | -6.694879 | -0.574759 | -0.658932 |
| C | 1.066896  | 3.571083  | 0.514017  | H | -5.640932 | 0.085867  | -2.486085 | C | 1.486963  | 3.257009  | 0.969617  | H | -5.346417 | 0.315465  | -2.559251 |
| H | 1.906383  | 1.708740  | 1.112463  | H | -3.193002 | 0.444702  | -2.324693 | H | 2.202456  | 1.255296  | 1.122494  | H | -2.891297 | 0.553824  | -2.308931 |
| H | 0.656002  | 2.481918  | 3.067254  | H | -2.207750 | -0.371473 | 2.299479  | H | 1.070980  | 1.645279  | 3.243951  | H | -2.095713 | -0.392907 | 2.325658  |
| H | 0.000329  | 0.926227  | 2.529639  | H | -2.672448 | -2.070314 | 2.161915  | H | 0.251521  | 0.320040  | 2.399728  | H | -2.671122 | -2.055387 | 2.160612  |
| H | -0.872998 | 2.437564  | 2.171598  | H | -3.757905 | -0.932777 | 2.960252  | H | -0.478224 | 1.944094  | 2.435026  | H | -3.700274 | -0.850550 | 2.933177  |
| H | 0.101679  | 4.070005  | 0.409730  | H | 0.196311  | -2.742729 | 0.370145  | H | 0.555508  | 3.825957  | 0.993397  | H | 0.251011  | -2.820334 | 0.506775  |
| H | 1.651228  | 4.106736  | 1.267544  | H | -1.538083 | -2.653039 | 0.154130  | H | 2.111149  | 3.582297  | 1.806764  | H | -1.465801 | -2.661128 | 0.205011  |
| H | 1.600267  | 3.625759  | -0.439343 | H | 2.074032  | 1.676404  | 0.738170  | H | 2.015324  | 3.478910  | 0.037986  | H | 2.322582  | 1.438150  | 0.937689  |
| C | 1.812967  | -0.574687 | -0.439935 | H | 0.918902  | 2.660751  | 2.650772  | C | 1.917089  | -0.657661 | -0.791959 | H | 1.169625  | 2.607985  | 2.750894  |
| O | 2.109178  | -1.749981 | -0.284398 | H | 0.240264  | 1.059816  | 2.312219  | O | 2.136257  | -1.859698 | -0.819024 | H | 0.340359  | 1.077789  | 2.419532  |
| S | 2.828554  | 0.606037  | -1.276386 | H | -0.650949 | 2.528420  | 1.836525  | S | 3.033854  | 0.564583  | -1.418563 | H | -0.355648 | 2.614998  | 1.847638  |
| C | 4.310399  | -0.416044 | -1.512245 | H | 0.259123  | 3.978808  | -0.112741 | C | 4.511260  | -0.484944 | -1.532562 | H | 0.791095  | 3.860819  | -0.121885 |
| C | 5.206031  | -0.575765 | -0.316683 | H | 1.861608  | 4.065811  | 0.637997  | C | 5.099747  | -0.870931 | -0.199962 | H | 2.328041  | 3.856108  | 0.760217  |
| C | 4.937988  | -0.237956 | 0.947767  | H | 1.692138  | 3.418085  | -1.003766 | C | 4.566021  | -0.658331 | 0.981535  | H | 2.240541  | 3.144095  | -0.862691 |
| H | 4.002954  | -1.392997 | -1.898295 | H | 3.859979  | -1.955001 | -1.927747 | H | 4.278970  | -1.372658 | -2.126799 | H | 4.293140  | -2.168980 | -1.362879 |
| H | 4.854490  | 0.086952  | -2.317892 | H | 4.906256  | -0.608630 | -2.355702 | H | 5.230256  | 0.110938  | -2.102707 | H | 5.284864  | -0.790306 | -1.835603 |
| H | 6.165033  | -1.033392 | -0.556081 | H | 6.081819  | -1.889086 | -0.642296 | H | 6.062818  | -1.387504 | -0.268127 | H | 6.113660  | -1.713903 | 0.374610  |
| H | 5.672374  | -0.404351 | 1.729194  | H | 5.717021  | -1.290761 | 1.707008  | H | 4.824979  | -0.859472 | 2.012206  | H | 5.037538  | -0.322000 | 2.360706  |
| H | 3.997251  | 0.223004  | 1.242256  | H | 4.077693  | -0.414609 | 1.306632  | H | 2.008320  | -1.207960 | 2.249400  |   |           |           |           |

|   |          |           |          |   |          |           |          |   |          |           |          |
|---|----------|-----------|----------|---|----------|-----------|----------|---|----------|-----------|----------|
| O | 4.439862 | -2.890703 | 0.952984 | O | 3.091665 | 0.049141  | 2.075590 | O | 1.760822 | -2.138567 | 2.149121 |
| H | 3.635042 | -2.564376 | 0.494631 | H | 3.359740 | -0.373665 | 2.914226 | H | 1.952937 | -2.337332 | 1.219616 |

| ADDITION REACTION |           |           |           |   |           |           |           |   |           |           |           |
|-------------------|-----------|-----------|-----------|---|-----------|-----------|-----------|---|-----------|-----------|-----------|
| MCR               |           |           | C1-Add    |   |           | ADDUCT    |           |   |           |           |           |
| MCR               |           |           | TS        |   |           | ADDUCT    |           |   |           |           |           |
| C                 | -0.541303 | 1.357243  | -0.510758 | C | -0.632981 | 1.202886  | -0.497151 | C | -0.821169 | 0.812270  | -0.499469 |
| C                 | -1.253727 | 0.174602  | -0.143723 | C | -1.260443 | -0.045913 | -0.198650 | C | -1.249563 | -0.505035 | -0.167967 |
| C                 | -0.314503 | -0.753148 | 0.268734  | C | -0.263639 | -0.916133 | 0.212991  | C | -0.144883 | -1.193577 | 0.293693  |
| N                 | 0.962045  | -0.173483 | 0.197589  | N | 0.965564  | -0.240127 | 0.182788  | N | 0.978620  | -0.350099 | 0.206193  |
| N                 | 0.850047  | 1.139132  | -0.307680 | N | 0.766162  | 1.077614  | -0.278016 | N | 0.585414  | 0.904400  | -0.305303 |
| C                 | -2.719282 | 0.040543  | -0.211348 | C | -2.720831 | -0.237856 | -0.270662 | C | -2.700159 | -0.935800 | -0.220146 |
| C                 | -3.494198 | -0.297564 | 0.921266  | C | -3.502659 | -0.476389 | 0.914203  | C | -3.487759 | -0.234749 | 0.876001  |
| C                 | -4.887832 | -0.359277 | 0.782348  | C | -4.885306 | -0.337587 | 0.839178  | C | -4.578105 | 0.535716  | 0.573826  |
| C                 | -5.513912 | -0.080763 | -0.430323 | C | -5.512801 | 0.087600  | -0.333713 | C | -5.034617 | 0.718800  | -0.753609 |
| C                 | -4.746796 | 0.274388  | -1.541842 | C | -4.756004 | 0.397500  | -1.473773 | C | -4.361988 | 0.076876  | -1.825519 |
| C                 | -3.362877 | 0.332193  | -1.427693 | C | -3.384229 | 0.261632  | -1.434923 | C | -3.262396 | -0.691982 | -1.597314 |
| C                 | -2.870216 | -0.587584 | 2.259706  | C | -2.851682 | -0.900841 | 2.194426  | C | -3.005333 | -0.426169 | 2.281219  |
| N                 | -0.479456 | -2.021278 | 0.638172  | N | -0.341943 | -2.198867 | 0.548413  | N | -0.022498 | -2.438914 | 0.750843  |
| C                 | 2.096361  | -0.918885 | -0.126626 | C | 2.157710  | -0.889469 | -0.146180 | C | 2.244230  | -0.838103 | -0.120930 |
| S                 | 3.250263  | -0.092113 | -1.187267 | S | 3.253827  | 0.047336  | -1.175849 | S | 3.186505  | 0.203413  | -1.202738 |
| C                 | 4.588363  | -1.316983 | -1.123814 | C | 4.678881  | -1.075838 | -1.127538 | C | 4.752407  | -0.713392 | -1.144055 |
| C                 | 5.387997  | -1.365652 | 0.148107  | C | 5.468520  | -1.094624 | 0.151419  | C | 5.560215  | -0.571345 | 0.115604  |
| C                 | 5.169879  | -0.684351 | 1.270985  | C | 5.198625  | -0.445575 | 1.282153  | C | 5.224879  | 0.083255  | 1.225387  |
| C                 | 1.545806  | 2.135920  | 0.579169  | C | 1.379494  | 2.088230  | 0.652952  | C | 1.051661  | 2.028786  | 0.579060  |
| C                 | 1.893624  | 3.390913  | -0.205204 | C | 1.657666  | 3.389258  | -0.082727 | C | 1.100366  | 3.333413  | -0.200296 |
| O                 | -0.974365 | 2.451542  | -0.894815 | O | -1.139614 | 2.280172  | -0.835902 | O | -1.491862 | 1.791831  | -0.854471 |

|   |           |           |           |   |           |           |           |   |           |           |           |
|---|-----------|-----------|-----------|---|-----------|-----------|-----------|---|-----------|-----------|-----------|
| C | 0.743927  | 2.416057  | 1.844460  | C | 0.541089  | 2.270450  | 1.912482  | C | 0.224148  | 2.117191  | 1.856116  |
| O | 2.251978  | -2.048180 | 0.301532  | O | 2.393673  | -2.013447 | 0.256934  | O | 2.643502  | -1.901752 | 0.317356  |
| H | -5.486564 | -0.619307 | 1.651481  | H | -5.481461 | -0.545038 | 1.723093  | H | -5.114485 | 1.020158  | 1.386500  |
| H | -6.595758 | -0.132616 | -0.505253 | H | -6.592897 | 0.193889  | -0.355818 | H | -5.905127 | 1.335153  | -0.947172 |
| H | -5.223768 | 0.498526  | -2.490695 | H | -5.245096 | 0.746462  | -2.376947 | H | -4.729834 | 0.204208  | -2.839609 |
| H | -2.756087 | 0.597227  | -2.289330 | H | -2.778998 | 0.497888  | -2.304843 | H | -2.735236 | -1.185235 | -2.409947 |
| H | -1.968430 | 0.010714  | 2.420889  | H | -1.947746 | -0.316790 | 2.395396  | H | -2.002649 | -0.000004 | 2.413220  |
| H | -2.585441 | -1.642813 | 2.341890  | H | -2.556752 | -1.955639 | 2.145024  | H | -2.934077 | -1.490045 | 2.534103  |
| H | -3.580428 | -0.375387 | 3.062155  | H | -3.544007 | -0.784454 | 3.030349  | H | -3.680907 | 0.055938  | 2.991343  |
| H | 0.326291  | -2.603035 | 0.827232  | H | 0.497879  | -2.726812 | 0.744927  | H | 0.889695  | -2.813845 | 0.972570  |
| H | -1.381658 | -2.454038 | 0.462002  | H | -1.217240 | -2.664678 | 0.321767  | H | -0.831007 | -3.042220 | 0.676577  |
| H | 2.479401  | 1.640779  | 0.858549  | H | 2.339080  | 1.645876  | 0.932962  | H | 2.076392  | 1.755332  | 0.843824  |
| H | 1.344696  | 3.025245  | 2.525184  | H | 1.089091  | 2.894532  | 2.623547  | H | 0.674379  | 2.852735  | 2.528327  |
| H | 0.485489  | 1.484514  | 2.359357  | H | 0.338733  | 1.306354  | 2.391394  | H | 0.200019  | 1.152568  | 2.374216  |
| H | -0.176584 | 2.963020  | 1.617564  | H | -0.410699 | 2.761949  | 1.688128  | H | -0.802765 | 2.431316  | 1.642808  |
| H | 1.000458  | 3.959939  | -0.469981 | H | 0.735062  | 3.913265  | -0.339164 | H | 0.099603  | 3.700201  | -0.435317 |
| H | 2.534519  | 4.023483  | 0.415533  | H | 2.252208  | 4.036953  | 0.567804  | H | 1.608204  | 4.084967  | 0.410822  |
| H | 2.438297  | 3.139180  | -1.119770 | H | 2.226600  | 3.203852  | -0.998306 | H | 1.660996  | 3.209672  | -1.131315 |
| H | 4.169779  | -2.301438 | -1.351859 | H | 4.336928  | -2.082914 | -1.382452 | H | 4.545245  | -1.767301 | -1.350262 |
| H | 5.237015  | -1.046175 | -1.963434 | H | 5.313168  | -0.737048 | -1.953529 | H | 5.320384  | -0.328610 | -1.997612 |
| H | 6.226181  | -2.060144 | 0.097396  | H | 6.350159  | -1.732763 | 0.097712  | H | 6.519117  | -1.086595 | 0.066479  |
| H | 5.823217  | -0.812585 | 2.128285  | H | 5.852214  | -0.544694 | 2.143106  | H | 5.900325  | 0.109690  | 2.074707  |
| H | 4.346927  | 0.019354  | 1.378287  | H | 4.330809  | 0.201378  | 1.392730  | H | 4.279166  | 0.611224  | 1.329158  |
| O | -3.074237 | -2.713996 | -0.714621 | O | -2.735242 | -2.244862 | -0.872915 | O | -2.686470 | -2.362356 | 0.025527  |
| H | -3.945081 | -2.512069 | -0.313204 | H | -3.695741 | -2.378184 | -0.797450 | H | -3.605240 | -2.670340 | 0.011371  |

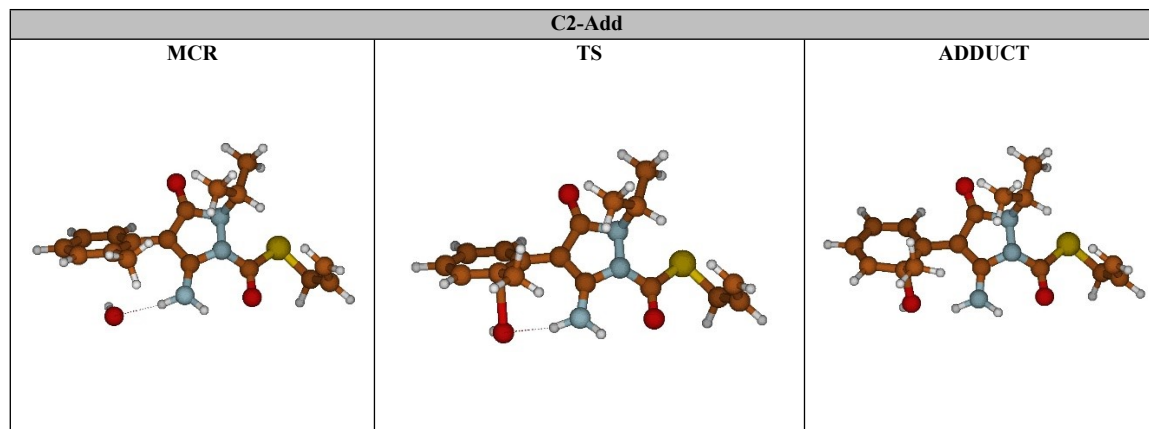

|   |           |           |           |   |           |           |           |   |           |           |           |
|---|-----------|-----------|-----------|---|-----------|-----------|-----------|---|-----------|-----------|-----------|
| C | -0.492849 | 1.436132  | -0.479683 | C | -0.508260 | 1.413422  | -0.453989 | C | -0.536438 | 1.353814  | -0.414851 |
| C | -1.237511 | 0.258702  | -0.176708 | C | -1.237198 | 0.216133  | -0.186225 | C | -1.243058 | 0.108900  | -0.259783 |
| C | -0.328180 | -0.717419 | 0.189053  | C | -0.311703 | -0.761989 | 0.146581  | C | -0.278766 | -0.849441 | 0.059571  |
| N | 0.963652  | -0.170687 | 0.159903  | N | 0.968907  | -0.192978 | 0.138819  | N | 0.980132  | -0.234601 | 0.101966  |
| N | 0.892357  | 1.170016  | -0.276979 | N | 0.879241  | 1.162053  | -0.246949 | N | 0.851359  | 1.134120  | -0.204230 |
| C | -2.701314 | 0.132687  | -0.273489 | C | -2.692176 | 0.072700  | -0.326365 | C | -2.689552 | -0.014563 | -0.395517 |
| C | -3.325742 | 0.429865  | -1.493298 | C | -3.296881 | 0.443932  | -1.528584 | C | -3.355739 | 0.793793  | -1.303596 |
| C | -4.706729 | 0.323764  | -1.638324 | C | -4.680111 | 0.358831  | -1.695473 | C | -4.752712 | 0.828156  | -1.402061 |
| C | -5.483699 | -0.086519 | -0.554430 | C | -5.486410 | -0.103388 | -0.651435 | C | -5.547290 | 0.030160  | -0.528812 |
| C | -4.873065 | -0.370614 | 0.664510  | C | -4.903075 | -0.466693 | 0.552800  | C | -4.960397 | -0.795843 | 0.372919  |
| C | -3.484349 | -0.260899 | 0.834922  | C | -3.500887 | -0.402732 | 0.749697  | C | -3.471104 | -0.971574 | 0.496945  |
| C | -2.876028 | -0.534188 | 2.185635  | C | -2.945669 | -0.543491 | 2.141113  | C | -3.055130 | -0.846061 | 1.963564  |
| N | -0.537952 | -2.000059 | 0.469878  | N | -0.506423 | -2.056142 | 0.362569  | N | -0.399370 | -2.157416 | 0.240179  |
| C | 2.081331  | -0.929505 | -0.187237 | C | 2.102268  | -0.920854 | -0.224776 | C | 2.149722  | -0.897994 | -0.271063 |
| S | 3.268964  | -0.084759 | -1.195478 | S | 3.283458  | -0.020964 | -1.192106 | S | 3.308775  | 0.093456  | -1.174472 |
| C | 4.574681  | -1.345599 | -1.171960 | C | 4.607118  | -1.263233 | -1.204464 | C | 4.679976  | -1.094908 | -1.225993 |
| C | 5.356795  | -1.469560 | 0.105767  | C | 5.381872  | -1.421401 | 0.074001  | C | 5.445424  | -1.282914 | 0.053956  |
| C | 5.144153  | -0.827559 | 1.252652  | C | 5.158407  | -0.814935 | 1.238045  | C | 5.185377  | -0.741235 | 1.242037  |
| C | 1.600630  | 2.097043  | 0.673534  | C | 1.560412  | 2.061949  | 0.749476  | C | 1.495345  | 1.997320  | 0.848527  |
| C | 1.984597  | 3.388177  | -0.031263 | C | 1.930946  | 3.386874  | 0.102967  | C | 1.847878  | 3.361629  | 0.278232  |
| O | -0.892262 | 2.559179  | -0.816341 | O | -0.920799 | 2.538918  | -0.761714 | O | -0.972140 | 2.490609  | -0.624112 |
| C | 0.791702  | 2.320239  | 1.945696  | C | 0.731897  | 2.220116  | 2.018749  | C | 0.644596  | 2.069353  | 2.111229  |
| O | 2.200528  | -2.081946 | 0.187666  | O | 2.236525  | -2.083516 | 0.109918  | O | 2.330569  | -2.068042 | 0.012691  |
| O | -3.429139 | -2.855438 | -0.033090 | O | -3.339698 | -2.596914 | 0.284656  | O | -3.172748 | -2.353682 | 0.133488  |
| H | -5.478980 | -0.674398 | 1.514414  | H | -5.519876 | -0.814395 | 1.376780  | H | -5.555369 | -1.418753 | 1.036769  |
| H | -6.560717 | -0.178393 | -0.655398 | H | -6.561759 | -0.172196 | -0.778399 | H | -6.630259 | 0.084544  | -0.591814 |
| H | -5.171411 | 0.554102  | -2.591955 | H | -5.125839 | 0.647914  | -2.642082 | H | -5.226808 | 1.466194  | -2.139367 |
| H | -2.711557 | 0.735163  | -2.336269 | H | -2.673459 | 0.797724  | -2.344690 | H | -2.770456 | 1.427680  | -1.961643 |
| H | -2.017766 | 0.117916  | 2.374678  | H | -2.708496 | 0.449377  | 2.540182  | H | -3.229000 | 0.175562  | 2.311240  |
| H | -2.526465 | -1.569430 | 2.265540  | H | -2.031376 | -1.138770 | 2.172963  | H | -1.997209 | -1.085599 | 2.100323  |
| H | -3.616827 | -0.375126 | 2.972626  | H | -3.683956 | -1.009069 | 2.797332  | H | -3.652609 | -1.531904 | 2.571036  |
| H | 0.238583  | -2.613153 | 0.678605  | H | 0.267572  | -2.660736 | 0.602098  | H | 0.405541  | -2.718115 | 0.484309  |
| H | -1.470222 | -2.383267 | 0.328633  | H | -1.464116 | -2.413375 | 0.298512  | H | -1.334804 | -2.558312 | 0.172138  |
| H | 2.520459  | 1.565751  | 0.931614  | H | 2.485845  | 1.535450  | 0.997135  | H | 2.428552  | 1.479486  | 1.084141  |
| H | 1.396971  | 2.877661  | 2.665681  | H | 1.320460  | 2.752955  | 2.770420  | H | 1.212667  | 2.568225  | 2.900977  |
| H | 0.510194  | 1.366235  | 2.404200  | H | 0.455035  | 1.244180  | 2.431982  | H | 0.379554  | 1.066503  | 2.463707  |
| H | -0.115748 | 2.897500  | 1.741991  | H | -0.179769 | 2.795043  | 1.827173  | H | -0.274206 | 2.638234  | 1.938424  |
| H | 1.108126  | 3.995232  | -0.265478 | H | 1.047600  | 3.989884  | -0.115427 | H | 0.956085  | 3.958101  | 0.077743  |
| H | 2.636910  | 3.965348  | 0.630210  | H | 2.566864  | 3.945827  | 0.795322  | H | 2.462553  | 3.895394  | 1.008669  |
| H | 2.529011  | 3.179015  | -0.956620 | H | 2.488441  | 3.225053  | -0.824058 | H | 2.422315  | 3.259484  | -0.646997 |
| H | 4.133792  | -2.307932 | -1.447318 | H | 4.181689  | -2.221089 | -1.516996 | H | 4.295430  | -2.052683 | -1.587772 |
| H | 5.240237  | -1.055510 | -1.991671 | H | 5.274050  | -0.934674 | -2.008497 | H | 5.343118  | -0.703846 | -2.004829 |

|   |           |           |           |   |           |           |           |   |           |           |           |
|---|-----------|-----------|-----------|---|-----------|-----------|-----------|---|-----------|-----------|-----------|
| H | 6.175492  | -2.185329 | 0.036185  | H | 6.205643  | -2.129509 | -0.011992 | H | 6.296992  | -1.954166 | -0.053978 |
| H | 5.782348  | -1.009048 | 2.111740  | H | 5.792512  | -1.017956 | 2.095342  | H | 5.817234  | -0.960039 | 2.097099  |
| H | 4.339773  | -0.105615 | 1.378332  | H | 4.348357  | -0.102408 | 1.379940  | H | 4.346941  | -0.067450 | 1.406601  |
| H | -3.651588 | -2.478316 | -0.909844 | H | -3.684340 | -2.543683 | -0.626010 | H | -3.495746 | -2.501187 | -0.768984 |

| C3-Add                                                                            |           |           |           |                                                                                    |           |           |           |                                                                                     |           |           |           |
|-----------------------------------------------------------------------------------|-----------|-----------|-----------|------------------------------------------------------------------------------------|-----------|-----------|-----------|-------------------------------------------------------------------------------------|-----------|-----------|-----------|
| MCR                                                                               |           |           |           | TS                                                                                 |           |           |           | ADDUCT                                                                              |           |           |           |
| 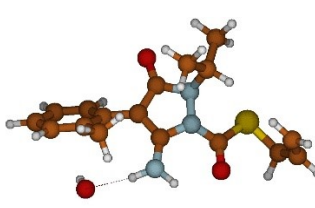 |           |           |           |  |           |           |           |  |           |           |           |
| C                                                                                 | -2.701260 | 0.132331  | -0.273898 | C                                                                                  | -2.631871 | 0.176239  | -0.295481 | C                                                                                   | -2.602807 | 0.123233  | -0.348867 |
| C                                                                                 | -3.325667 | 0.428678  | -1.493908 | C                                                                                  | -3.240570 | 0.555654  | -1.505282 | C                                                                                   | -3.177459 | 0.596418  | -1.566938 |
| C                                                                                 | -4.706684 | 0.322652  | -1.638808 | C                                                                                  | -4.625626 | 0.488057  | -1.683227 | C                                                                                   | -4.573103 | 0.520937  | -1.787183 |
| C                                                                                 | -5.483669 | -0.086696 | -0.554578 | C                                                                                  | -5.422022 | 0.014288  | -0.654257 | C                                                                                   | -5.400353 | -0.016545 | -0.846636 |
| C                                                                                 | -4.873037 | -0.370018 | 0.664551  | C                                                                                  | -4.827366 | -0.409010 | 0.555919  | C                                                                                   | -4.884843 | -0.552895 | 0.450339  |
| C                                                                                 | -3.484304 | -0.260389 | 0.834819  | C                                                                                  | -3.429920 | -0.263754 | 0.771099  | C                                                                                   | -3.396981 | -0.400822 | 0.645645  |
| C                                                                                 | -1.237458 | 0.258381  | -0.177162 | C                                                                                  | -1.168353 | 0.277052  | -0.180747 | C                                                                                   | -1.139714 | 0.234371  | -0.201611 |
| C                                                                                 | -2.875788 | -0.532737 | 2.185628  | C                                                                                  | -2.868316 | -0.625137 | 2.114276  | C                                                                                   | -2.880757 | -0.851078 | 1.978491  |
| H                                                                                 | -5.478962 | -0.673101 | 1.514698  | H                                                                                  | -5.459889 | -0.620595 | 1.411598  | H                                                                                   | -5.392871 | -0.048361 | 1.285999  |
| H                                                                                 | -6.560706 | -0.178474 | -0.655417 | H                                                                                  | -6.498775 | -0.055769 | -0.769486 | H                                                                                   | -6.471639 | -0.086977 | -1.012436 |
| H                                                                                 | -5.171361 | 0.552372  | -2.592589 | H                                                                                  | -5.065867 | 0.800948  | -2.624125 | H                                                                                   | -4.979929 | 0.889097  | -2.724512 |
| H                                                                                 | -2.711472 | 0.733304  | -2.337116 | H                                                                                  | -2.609611 | 0.905264  | -2.318002 | H                                                                                   | -2.525936 | 1.002458  | -2.333381 |
| H                                                                                 | -2.018570 | 0.120745  | 2.374709  | H                                                                                  | -1.936125 | -0.091446 | 2.318340  | H                                                                                   | -1.907104 | -0.410191 | 2.208516  |
| H                                                                                 | -2.524539 | -1.567401 | 2.265597  | H                                                                                  | -2.659290 | -1.700293 | 2.172761  | H                                                                                   | -2.775073 | -1.942488 | 2.022615  |
| H                                                                                 | -3.616916 | -0.374819 | 2.972537  | H                                                                                  | -3.590640 | -0.392321 | 2.900557  | H                                                                                   | -3.589870 | -0.571166 | 2.765312  |
| C                                                                                 | -0.328074 | -0.717579 | 0.188858  | C                                                                                  | -0.278266 | -0.727533 | 0.147881  | C                                                                                   | -0.237868 | -0.772955 | 0.081806  |
| N                                                                                 | 0.963720  | -0.170730 | 0.159641  | N                                                                                  | 1.022135  | -0.204193 | 0.143655  | N                                                                                   | 1.056115  | -0.232557 | 0.118240  |
| N                                                                                 | 0.892321  | 1.169982  | -0.277229 | N                                                                                  | 0.976287  | 1.154485  | -0.237445 | N                                                                                   | 0.993970  | 1.144121  | -0.188614 |
| C                                                                                 | -0.492913 | 1.435879  | -0.480166 | C                                                                                  | -0.402293 | 1.453949  | -0.432603 | C                                                                                   | -0.387872 | 1.433705  | -0.378073 |
| O                                                                                 | -0.892441 | 2.558802  | -0.817048 | O                                                                                  | -0.783067 | 2.594920  | -0.724398 | O                                                                                   | -0.781672 | 2.585113  | -0.607204 |
| N                                                                                 | -0.537719 | -2.000166 | 0.470014  | N                                                                                  | -0.510319 | -2.016383 | 0.386614  | N                                                                                   | -0.451835 | -2.075641 | 0.257032  |



|   |           |           |           |   |           |           |           |   |           |           |           |
|---|-----------|-----------|-----------|---|-----------|-----------|-----------|---|-----------|-----------|-----------|
| H | 0.238900  | -2.613152 | 0.678756  | H | 0.254619  | -2.657633 | 0.550445  | H | 0.322643  | -2.714142 | 0.381276  |
| H | -1.469971 | -2.383517 | 0.328938  | H | -1.442603 | -2.379101 | 0.229291  | H | -1.379747 | -2.440552 | 0.083917  |
| C | 1.600160  | 2.097024  | 0.673653  | C | 1.698830  | 2.028864  | 0.752087  | C | 1.695803  | 1.973910  | 0.852973  |
| C | 0.791024  | 2.319550  | 1.945799  | C | 0.890789  | 2.211577  | 2.031167  | C | 0.871541  | 2.085555  | 2.129988  |
| C | 1.983788  | 3.388509  | -0.030682 | C | 2.105032  | 3.342209  | 0.103186  | C | 2.097762  | 3.321439  | 0.275293  |
| H | 2.520147  | 1.565972  | 0.931658  | H | 2.609509  | 1.472350  | 0.988167  | H | 2.608796  | 1.414720  | 1.072767  |
| H | 1.395940  | 2.877171  | 2.665930  | H | 1.503879  | 2.727007  | 2.775360  | H | 1.473139  | 2.563961  | 2.907528  |
| H | 0.509991  | 1.365322  | 2.404123  | H | 0.590978  | 1.244128  | 2.448028  | H | 0.571747  | 1.096092  | 2.491822  |
| H | -0.116711 | 2.896377  | 1.742124  | H | -0.005676 | 2.813053  | 1.850166  | H | -0.025961 | 2.691289  | 1.970119  |
| H | 1.107213  | 3.995628  | -0.264343 | H | 1.239807  | 3.975504  | -0.101367 | H | 1.228915  | 3.955068  | 0.087841  |
| H | 2.636258  | 3.965426  | 0.630859  | H | 2.769174  | 3.877133  | 0.787975  | H | 2.745663  | 3.829468  | 0.995248  |
| H | 2.527941  | 3.179832  | -0.956302 | H | 2.643870  | 3.164117  | -0.831852 | H | 2.652589  | 3.194361  | -0.658766 |
| C | 2.081460  | -0.929423 | -0.187423 | C | 2.128973  | -0.969008 | -0.226720 | C | 2.177613  | -0.960400 | -0.278137 |
| O | 2.200710  | -2.081906 | 0.187357  | O | 2.225450  | -2.136013 | 0.107122  | O | 2.284978  | -2.144313 | -0.013111 |
| S | 3.269205  | -0.084463 | -1.195415 | S | 3.333578  | -0.109349 | -1.200511 | S | 3.388784  | -0.030440 | -1.177440 |
| C | 4.575026  | -1.345185 | -1.171876 | C | 4.621173  | -1.388982 | -1.210999 | C | 4.692761  | -1.291851 | -1.237676 |
| C | 5.356884  | -1.469325 | 0.105993  | C | 5.394295  | -1.562918 | 0.066417  | C | 5.444350  | -1.531126 | 0.042023  |
| C | 5.144125  | -0.827326 | 1.252857  | C | 5.186739  | -0.949645 | 1.229840  | C | 5.207218  | -0.990534 | 1.235404  |
| H | 4.134316  | -2.307510 | -1.447541 | H | 4.168242  | -2.335857 | -1.518280 | H | 4.257798  | -2.224649 | -1.607457 |
| H | 5.240746  | -1.054849 | -1.991374 | H | 5.294909  | -1.082682 | -2.018061 | H | 5.377311  | -0.931240 | -2.012622 |
| H | 6.175509  | -2.185190 | 0.036531  | H | 6.201026  | -2.290352 | -0.019727 | H | 6.262057  | -2.242439 | -0.070995 |
| H | 5.782157  | -1.008912 | 2.112047  | H | 5.817127  | -1.166178 | 2.086562  | H | 5.824578  | -1.249501 | 2.089820  |
| H | 4.339796  | -0.105303 | 1.378413  | H | 4.394165  | -0.217721 | 1.371812  | H | 4.402399  | -0.278175 | 1.405210  |
| O | -3.429000 | -2.855514 | -0.031090 | O | -4.767690 | -2.492003 | 0.185320  | O | -5.281704 | -1.934367 | 0.621678  |
| H | -3.651061 | -2.479140 | -0.908260 | H | -4.157709 | -2.423971 | -0.571452 | H | -4.892343 | -2.440685 | -0.107344 |

| C4-Add                                                                            |           |           |           |                                                                                    |           |           |           |                                                                                     |           |           |           |  |
|-----------------------------------------------------------------------------------|-----------|-----------|-----------|------------------------------------------------------------------------------------|-----------|-----------|-----------|-------------------------------------------------------------------------------------|-----------|-----------|-----------|--|
| MCR                                                                               |           |           |           | TS                                                                                 |           |           |           | ADDUCT                                                                              |           |           |           |  |
| 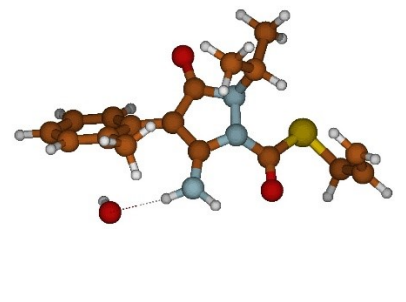 |           |           |           |  |           |           |           |  |           |           |           |  |
| C                                                                                 | -0.493070 | 1.436291  | -0.480263 | C                                                                                  | -0.398106 | 1.360353  | -0.488917 | C                                                                                   | -0.392594 | 1.327301  | -0.430717 |  |
| C                                                                                 | -1.237579 | 0.258822  | -0.177378 | C                                                                                  | -1.139590 | 0.207652  | -0.074896 | C                                                                                   | -1.112901 | 0.136324  | -0.086469 |  |
| C                                                                                 | -0.328081 | -0.717490 | 0.187642  | C                                                                                  | -0.216349 | -0.747519 | 0.319691  | C                                                                                   | -0.164894 | -0.819961 | 0.249380  |  |
| N                                                                                 | 0.963621  | -0.170750 | 0.158169  | N                                                                                  | 1.072372  | -0.210069 | 0.202982  | N                                                                                   | 1.111526  | -0.247405 | 0.172511  |  |
| N                                                                                 | 0.892323  | 1.170235  | -0.277762 | N                                                                                  | 0.988575  | 1.099374  | -0.314749 | N                                                                                   | 0.999603  | 1.088337  | -0.268282 |  |
| C                                                                                 | -2.701348 | 0.132500  | -0.274236 | C                                                                                  | -2.600681 | 0.107902  | -0.110266 | C                                                                                   | -2.564122 | 0.013123  | -0.131444 |  |
| C                                                                                 | -3.325855 | 0.428936  | -1.494104 | C                                                                                  | -3.261614 | 0.478345  | -1.301910 | C                                                                                   | -3.243961 | 0.456526  | -1.312566 |  |
| C                                                                                 | -4.706927 | 0.322796  | -1.638863 | C                                                                                  | -4.636462 | 0.410883  | -1.405699 | C                                                                                   | -4.591908 | 0.375538  | -1.446254 |  |
| C                                                                                 | -5.483765 | -0.086959 | -0.554761 | C                                                                                  | -5.397264 | -0.067897 | -0.313480 | C                                                                                   | -5.462472 | -0.198046 | -0.373813 |  |
| C                                                                                 | -4.872942 | -0.370580 | 0.664263  | C                                                                                  | -4.739655 | -0.358885 | 0.900381  | C                                                                                   | -4.699265 | -0.543766 | 0.865783  |  |
| C                                                                                 | -3.484259 | -0.260536 | 0.834513  | C                                                                                  | -3.355644 | -0.292249 | 1.021338  | C                                                                                   | -3.340180 | -0.470753 | 0.979675  |  |
| C                                                                                 | -2.875590 | -0.532329 | 2.185379  | C                                                                                  | -2.714676 | -0.588588 | 2.352594  | C                                                                                   | -2.677977 | -0.831182 | 2.287574  |  |
| N                                                                                 | -0.537804 | -2.000301 | 0.467537  | N                                                                                  | -0.406170 | -2.011157 | 0.685937  | N                                                                                   | -0.326973 | -2.110652 | 0.525319  |  |
| C                                                                                 | 2.081622  | -0.929176 | -0.188123 | C                                                                                  | 2.176616  | -0.994926 | -0.137547 | C                                                                                   | 2.237141  | -0.983286 | -0.202159 |  |
| S                                                                                 | 3.269947  | -0.083893 | -1.195151 | S                                                                                  | 3.327276  | -0.219312 | -1.237949 | S                                                                                   | 3.375384  | -0.118654 | -1.248266 |  |
| C                                                                                 | 4.575482  | -1.344895 | -1.171622 | C                                                                                  | 4.627969  | -1.484742 | -1.189644 | C                                                                                   | 4.712799  | -1.346107 | -1.247753 |  |
| C                                                                                 | 5.357175  | -1.469315 | 0.106309  | C                                                                                  | 5.459015  | -1.537780 | 0.061692  | C                                                                                   | 5.526556  | -1.441565 | 0.012537  |  |
| C                                                                                 | 5.143914  | -0.827912 | 1.253412  | C                                                                                  | 5.289385  | -0.834742 | 1.179459  | C                                                                                   | 5.326441  | -0.794471 | 1.158806  |  |
| C                                                                                 | 1.599883  | 2.096514  | 0.674147  | C                                                                                  | 1.738706  | 2.085591  | 0.540036  | C                                                                                   | 1.721422  | 2.038489  | 0.649716  |  |
| C                                                                                 | 1.983795  | 3.388557  | -0.028988 | C                                                                                  | 2.106060  | 3.317149  | -0.271856 | C                                                                                   | 2.061642  | 3.326764  | -0.081911 |  |
| O                                                                                 | -0.892544 | 2.559356  | -0.816741 | O                                                                                  | -0.805895 | 2.459963  | -0.879099 | O                                                                                   | -0.823526 | 2.438987  | -0.757161 |  |
| C                                                                                 | 0.790344  | 2.318014  | 1.946218  | C                                                                                  | 0.977776  | 2.408912  | 1.820183  | C                                                                                   | 0.946937  | 2.263747  | 1.942644  |  |
| O                                                                                 | 2.200780  | -2.081738 | 0.186537  | O                                                                                  | 2.306132  | -2.121667 | 0.304512  | O                                                                                   | 2.393293  | -2.129930 | 0.176493  |  |
| O                                                                                 | -3.429452 | -2.855722 | -0.028030 | O                                                                                  | -5.654234 | -2.079042 | -1.025679 | O                                                                                   | -6.193303 | -1.348218 | -0.868474 |  |

|   |           |           |           |   |           |           |           |   |           |           |           |
|---|-----------|-----------|-----------|---|-----------|-----------|-----------|---|-----------|-----------|-----------|
| H | -5.478775 | -0.673921 | 1.514378  | H | -5.331946 | -0.647804 | 1.764500  | H | -5.289748 | -0.872933 | 1.718093  |
| H | -6.560851 | -0.178795 | -0.655348 | H | -6.478118 | 0.007574  | -0.331344 | H | -6.263860 | 0.510838  | -0.125178 |
| H | -5.171674 | 0.552499  | -2.592618 | H | -5.134189 | 0.687187  | -2.329441 | H | -5.079696 | 0.696093  | -2.362662 |
| H | -2.711820 | 0.733875  | -2.337314 | H | -2.666351 | 0.806431  | -2.148758 | H | -2.642655 | 0.845833  | -2.130257 |
| H | -2.019845 | 0.122948  | 2.374983  | H | -1.805804 | 0.002017  | 2.500314  | H | -1.839240 | -0.162128 | 2.504867  |
| H | -2.522081 | -1.566233 | 2.265078  | H | -2.443248 | -1.645395 | 2.445295  | H | -2.288977 | -1.853803 | 2.280316  |
| H | -3.617305 | -0.376326 | 2.972113  | H | -3.413312 | -0.359547 | 3.160619  | H | -3.399551 | -0.759330 | 3.104368  |
| H | 0.238563  | -2.613358 | 0.676966  | H | 0.382062  | -2.613291 | 0.885625  | H | 0.472792  | -2.708747 | 0.686748  |
| H | -1.470527 | -2.383107 | 0.328012  | H | -1.330175 | -2.413448 | 0.594731  | H | -1.242212 | -2.523246 | 0.398673  |
| H | 2.519796  | 1.565270  | 0.932006  | H | 2.662425  | 1.563936  | 0.803371  | H | 2.656634  | 1.524461  | 0.886072  |
| H | 1.395134  | 2.874833  | 2.667073  | H | 1.615933  | 3.004604  | 2.478383  | H | 1.566398  | 2.834992  | 2.639269  |
| H | 0.508962  | 1.363424  | 2.403577  | H | 0.699221  | 1.493207  | 2.352733  | H | 0.690392  | 1.310813  | 2.417834  |
| H | -0.117218 | 2.895208  | 1.742786  | H | 0.071999  | 2.985536  | 1.608137  | H | 0.027150  | 2.828338  | 1.760545  |
| H | 1.107329  | 3.995809  | -0.262692 | H | 1.224733  | 3.909671  | -0.524285 | H | 1.167184  | 3.913038  | -0.300503 |
| H | 2.635836  | 3.964990  | 0.633399  | H | 2.780484  | 3.938504  | 0.324124  | H | 2.719339  | 3.925230  | 0.554813  |
| H | 2.528525  | 3.180614  | -0.954434 | H | 2.621089  | 3.035307  | -1.194770 | H | 2.585715  | 3.115869  | -1.018501 |
| H | 4.134528  | -2.307092 | -1.447371 | H | 4.172569  | -2.458761 | -1.390394 | H | 4.290069  | -2.320963 | -1.507005 |
| H | 5.241311  | -1.054670 | -1.991060 | H | 5.261738  | -1.247665 | -2.050459 | H | 5.351701  | -1.044444 | -2.084438 |
| H | 6.176066  | -2.184858 | 0.036691  | H | 6.275814  | -2.256378 | -0.000551 | H | 6.359137  | -2.139654 | -0.070299 |
| H | 5.781778  | -1.009668 | 2.112690  | H | 5.961171  | -0.969104 | 2.021402  | H | 5.988693  | -0.954239 | 2.003875  |
| H | 4.339335  | -0.106182 | 1.379077  | H | 4.489545  | -0.106394 | 1.297169  | H | 4.509598  | -0.089114 | 1.297762  |
| H | -3.650270 | -2.481844 | -0.906590 | H | -4.696453 | -2.245005 | -1.083223 | H | -5.541789 | -2.029181 | -1.094012 |

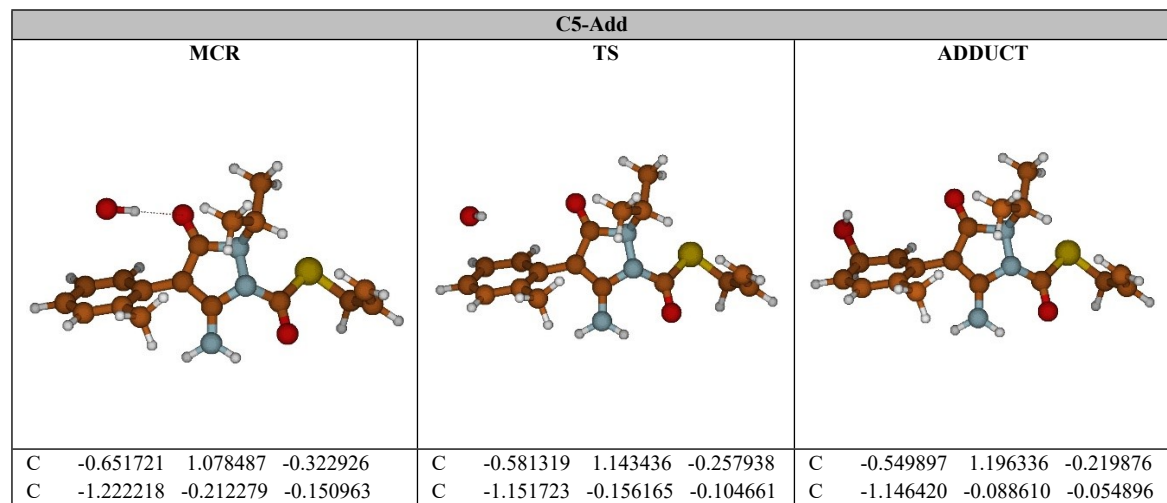

|   |           |           |           |   |           |           |           |   |           |           |           |
|---|-----------|-----------|-----------|---|-----------|-----------|-----------|---|-----------|-----------|-----------|
| C | -0.177196 | -1.079403 | 0.119296  | C | -0.109279 | -1.035062 | 0.119613  | C | -0.121058 | -0.989840 | 0.153892  |
| N | 1.021002  | -0.354377 | 0.145881  | N | 1.095293  | -0.317733 | 0.143628  | N | 1.101548  | -0.302673 | 0.148781  |
| N | 0.752472  | 0.996612  | -0.159076 | N | 0.831293  | 1.044438  | -0.117125 | N | 0.864299  | 1.065658  | -0.105439 |
| C | -2.660575 | -0.515322 | -0.260564 | C | -2.591657 | -0.449852 | -0.196484 | C | -2.596186 | -0.361762 | -0.111417 |
| C | -3.330749 | -0.154421 | -1.441703 | C | -3.280025 | -0.059706 | -1.343693 | C | -3.285880 | -0.018686 | -1.244820 |
| C | -4.698372 | -0.373524 | -1.587166 | C | -4.674174 | -0.248185 | -1.461463 | C | -4.765822 | -0.173448 | -1.393620 |
| C | -5.411928 | -0.967404 | -0.545714 | C | -5.353851 | -0.950438 | -0.436436 | C | -5.396895 | -0.825672 | -0.204260 |
| C | -4.754218 | -1.320537 | 0.629881  | C | -4.673238 | -1.330537 | 0.704101  | C | -4.683245 | -1.154647 | 0.905484  |
| C | -3.381878 | -1.096307 | 0.801641  | C | -3.297541 | -1.074407 | 0.861174  | C | -3.278295 | -0.930022 | 1.014980  |
| C | -2.728035 | -1.458780 | 2.109856  | C | -2.621603 | -1.468494 | 2.142993  | C | -2.573151 | -1.283566 | 2.288587  |
| N | -0.196189 | -2.399187 | 0.276649  | N | -0.131352 | -2.359903 | 0.245893  | N | -0.173780 | -2.313032 | 0.289373  |
| C | 2.234254  | -0.912067 | -0.265739 | C | 2.294525  | -0.869353 | -0.310252 | C | 2.276289  | -0.881987 | -0.331401 |
| S | 3.275871  | 0.174605  | -1.197755 | S | 3.329938  | 0.244145  | -1.218652 | S | 3.321687  | 0.211940  | -1.253264 |
| C | 4.744973  | -0.887969 | -1.288816 | C | 4.786352  | -0.827753 | -1.379377 | C | 4.751117  | -0.890946 | -1.443567 |
| C | 5.553693  | -1.014070 | -0.028129 | C | 5.617257  | -1.012467 | -0.140549 | C | 5.598675  | -1.100201 | -0.219980 |
| C | 5.270462  | -0.512218 | 1.171986  | C | 5.362315  | -0.555207 | 1.083475  | C | 5.371802  | -0.648023 | 1.011432  |
| C | 1.356308  | 1.930728  | 0.856029  | C | 1.450491  | 1.938708  | 0.922897  | C | 1.517744  | 1.939826  | 0.930876  |
| C | 1.561952  | 3.310283  | 0.251629  | C | 1.653330  | 3.338531  | 0.365606  | C | 1.737214  | 3.340488  | 0.382008  |
| O | -1.212548 | 2.171483  | -0.530013 | O | -1.142732 | 2.233084  | -0.431197 | O | -1.085807 | 2.300423  | -0.385253 |
| C | 0.549510  | 1.947200  | 2.148661  | C | 0.661020  | 1.913541  | 2.226231  | C | 0.750711  | 1.918239  | 2.247759  |
| O | 2.517198  | -2.063369 | 0.008890  | O | 2.575275  | -2.032398 | -0.084249 | O | 2.532812  | -2.053042 | -0.117467 |
| H | -5.315532 | -1.765707 | 1.447550  | H | -5.203454 | -1.828878 | 1.510892  | H | -5.192912 | -1.596603 | 1.758751  |
| H | -6.478170 | -1.146541 | -0.644635 | H | -6.415125 | -1.152794 | -0.538325 | H | -6.467705 | -1.003685 | -0.249747 |
| H | -5.199690 | -0.085308 | -2.505861 | H | -5.156313 | -0.085319 | -2.417975 | H | -4.986315 | -0.753809 | -2.300351 |
| H | -2.762342 | 0.296685  | -2.251248 | H | -2.738566 | 0.421307  | -2.153256 | H | -2.753667 | 0.411957  | -2.089655 |
| H | -1.906020 | -0.777612 | 2.349756  | H | -1.783565 | -0.805760 | 2.376636  | H | -1.706096 | -0.640284 | 2.465825  |
| H | -2.318961 | -2.475012 | 2.084636  | H | -2.228674 | -2.490186 | 2.078657  | H | -2.213416 | -2.321190 | 2.270344  |
| H | -3.459340 | -1.421413 | 2.920710  | H | -3.334929 | -1.445536 | 2.969920  | H | -3.255376 | -1.195912 | 3.138375  |
| H | 0.658285  | -2.918326 | 0.428892  | H | 0.727214  | -2.885303 | 0.345124  | H | 0.669882  | -2.859914 | 0.396604  |
| H | -1.064680 | -2.893851 | 0.118485  | H | -1.000152 | -2.848356 | 0.071125  | H | -1.063999 | -2.778184 | 0.166969  |
| H | 2.339939  | 1.501557  | 1.061903  | H | 2.435502  | 1.500280  | 1.101799  | H | 2.497450  | 1.481931  | 1.089402  |
| H | 1.097413  | 2.512187  | 2.907550  | H | 1.219144  | 2.452697  | 2.996444  | H | 1.329673  | 2.444855  | 3.011268  |
| H | 0.394031  | 0.931026  | 2.526624  | H | 0.508855  | 0.885669  | 2.572704  | H | 0.589955  | 0.890677  | 2.591180  |
| H | -0.424375 | 2.424609  | 2.002650  | H | -0.314066 | 2.396446  | 2.108682  | H | -0.219309 | 2.415717  | 2.149989  |
| H | 0.612578  | 3.817121  | 0.069429  | H | 0.703306  | 3.854067  | 0.213092  | H | 0.794772  | 3.875725  | 0.252280  |
| H | 2.145194  | 3.913107  | 0.953403  | H | 2.246920  | 3.915098  | 1.080712  | H | 2.355687  | 3.898996  | 1.090359  |
| H | 2.115627  | 3.244152  | -0.689299 | H | 2.194937  | 3.304032  | -0.584033 | H | 2.259706  | 3.303864  | -0.578225 |
| H | 4.437496  | -1.874042 | -1.648289 | H | 4.462850  | -1.795513 | -1.772988 | H | 4.400345  | -1.849550 | -1.836246 |
| H | 5.352526  | -0.436562 | -2.080134 | H | 5.383690  | -0.349951 | -2.162948 | H | 5.345689  | -0.422303 | -2.234736 |
| H | 6.462596  | -1.599718 | -0.163282 | H | 6.516736  | -1.602024 | -0.315925 | H | 6.484356  | -1.704519 | -0.414347 |
| H | 5.940034  | -0.678435 | 2.009995  | H | 6.045200  | -0.761159 | 1.901693  | H | 6.063749  | -0.872522 | 1.817050  |
| H | 4.376066  | 0.077107  | 1.363717  | H | 4.478181  | 0.035343  | 1.314665  | H | 4.502106  | -0.043769 | 1.261181  |

|   |           |          |           |   |           |          |           |   |           |          |           |
|---|-----------|----------|-----------|---|-----------|----------|-----------|---|-----------|----------|-----------|
| O | -3.934855 | 2.389490 | -0.438302 | O | -5.272632 | 1.713475 | -0.957106 | O | -5.389028 | 1.104645 | -1.671585 |
| H | -2.941523 | 2.304744 | -0.450802 | H | -4.817906 | 1.719090 | -0.096051 | H | -5.230067 | 1.676726 | -0.905695 |

|                                                                                   |           |           | C6-Add                                                                             |    |           |                                                                                     |           |        |           |           |           |
|-----------------------------------------------------------------------------------|-----------|-----------|------------------------------------------------------------------------------------|----|-----------|-------------------------------------------------------------------------------------|-----------|--------|-----------|-----------|-----------|
| MCR                                                                               |           |           |                                                                                    | TS |           |                                                                                     |           | ADDUCT |           |           |           |
| 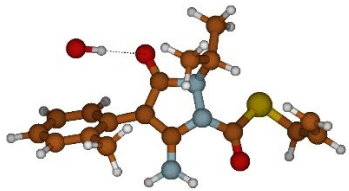 |           |           |  |    |           |  |           |        |           |           |           |
| C                                                                                 | -3.381779 | -1.096275 | 0.801825                                                                           | C  | -3.362532 | -1.097061                                                                           | 0.797882  | C      | -3.373503 | -1.060900 | 0.821916  |
| C                                                                                 | -2.660584 | -0.515333 | -0.260501                                                                          | C  | -2.678447 | -0.357970                                                                           | -0.181320 | C      | -2.695752 | -0.263174 | -0.085093 |
| C                                                                                 | -3.330896 | -0.154450 | -1.441543                                                                          | C  | -3.402639 | 0.157074                                                                            | -1.299083 | C      | -3.444871 | 0.433181  | -1.206519 |
| C                                                                                 | -4.698566 | -0.373502 | -1.586823                                                                          | C  | -4.736606 | -0.258452                                                                           | -1.534219 | C      | -4.764346 | -0.198109 | -1.524333 |
| C                                                                                 | -5.412012 | -0.967274 | -0.545252                                                                          | C  | -5.387589 | -1.030871                                                                           | -0.592159 | C      | -5.367607 | -1.045910 | -0.650308 |
| C                                                                                 | -4.754149 | -1.320402 | 0.630271                                                                           | C  | -4.710320 | -1.416494                                                                           | 0.571716  | C      | -4.716894 | -1.425442 | 0.554870  |
| C                                                                                 | -1.222215 | -0.212288 | -0.151094                                                                          | C  | -1.242523 | -0.073152                                                                           | -0.085852 | C      | -1.259245 | -0.009560 | -0.002643 |
| C                                                                                 | -0.651791 | 1.078528  | -0.322961                                                                          | C  | -0.615993 | 1.196655                                                                            | -0.272355 | C      | -0.602157 | 1.243210  | -0.208217 |
| N                                                                                 | 0.752441  | 0.996655  | -0.159303                                                                          | N  | 0.786497  | 1.046748                                                                            | -0.127800 | N      | 0.798063  | 1.064938  | -0.088684 |
| N                                                                                 | 1.021031  | -0.354394 | 0.145160                                                                           | N  | 1.001256  | -0.317521                                                                           | 0.155396  | N      | 0.988971  | -0.305829 | 0.180548  |
| C                                                                                 | -0.177096 | -1.079424 | 0.118768                                                                           | C  | -0.225218 | -0.990057                                                                           | 0.142005  | C      | -0.252118 | -0.950807 | 0.188647  |
| O                                                                                 | -1.212674 | 2.171555  | -0.529793                                                                          | O  | -1.124027 | 2.311724                                                                            | -0.468027 | O      | -1.087212 | 2.370560  | -0.407123 |
| N                                                                                 | -0.196130 | -2.399238 | 0.275960                                                                           | N  | -0.294150 | -2.311346                                                                           | 0.258498  | N      | -0.347498 | -2.271919 | 0.287165  |
| C                                                                                 | 2.234376  | -0.911972 | -0.266166                                                                          | C  | 2.185012  | -0.919889                                                                           | -0.281173 | C      | 2.149789  | -0.927680 | -0.288144 |
| O                                                                                 | 2.517247  | -2.063338 | 0.008307                                                                           | O  | 2.423553  | -2.085398                                                                           | -0.025082 | O      | 2.368376  | -2.101727 | -0.053233 |
| C                                                                                 | 1.356323  | 1.930532  | 0.855990                                                                           | C  | 1.444150  | 1.943511                                                                            | 0.887731  | C      | 1.488877  | 1.939449  | 0.924783  |
| C                                                                                 | 0.549609  | 1.946646  | 2.148692                                                                           | C  | 0.651857  | 1.990221                                                                            | 2.188558  | C      | 0.719487  | 1.984296  | 2.239283  |
| C                                                                                 | -2.727719 | -1.458838 | 2.109896                                                                           | C  | -2.718736 | -1.540269                                                                           | 2.086930  | C      | -2.753444 | -1.567378 | 2.102092  |
| S                                                                                 | 3.276227  | 0.174857  | -1.197719                                                                          | S  | 3.257774  | 0.135020                                                                            | -1.213450 | S      | 3.226591  | 0.116908  | -1.227885 |
| C                                                                                 | 4.745454  | -0.887574 | -1.288486                                                                          | C  | 4.679877  | -0.987018                                                                           | -1.338504 | C      | 4.622922  | -1.031822 | -1.394237 |
| C                                                                                 | 5.553804  | -1.013832 | -0.027592                                                                          | C  | 5.497947  | -1.164961                                                                           | -0.090187 | C      | 5.461616  | -1.241995 | -0.164733 |
| C                                                                                 | 5.270091  | -0.512295 | 1.172537                                                                           | C  | 5.252519  | -0.666446                                                                           | 1.119571  | C      | 5.246058  | -0.759697 | 1.057213  |
| C                                                                                 | 1.561877  | 3.310243  | 0.251930                                                                           | C  | 1.709164  | 3.315556                                                                            | 0.289564  | C      | 1.764712  | 3.313956  | 0.337565  |
| O                                                                                 | -3.935942 | 2.389036  | -0.438601                                                                          | O  | -3.929534 | 2.026050                                                                            | -0.584178 | O      | -3.736120 | 1.807906  | -0.848867 |

|   |           |           |           |   |           |           |           |   |           |           |           |
|---|-----------|-----------|-----------|---|-----------|-----------|-----------|---|-----------|-----------|-----------|
| H | -5.315381 | -1.765522 | 1.448024  | H | -5.239815 | -1.985498 | 1.331828  | H | -5.243675 | -2.041541 | 1.277400  |
| H | -6.478293 | -1.146288 | -0.643968 | H | -6.420382 | -1.328892 | -0.740031 | H | -6.358558 | -1.437617 | -0.861076 |
| H | -5.199959 | -0.085314 | -2.505486 | H | -5.243694 | 0.079523  | -2.431931 | H | -5.257321 | 0.120098  | -2.438247 |
| H | -2.762590 | 0.296553  | -2.251215 | H | -2.838784 | 0.604496  | -2.111372 | H | -2.809739 | 0.450460  | -2.102960 |
| H | -2.317890 | -2.474748 | 2.084204  | H | -2.378843 | -2.580266 | 2.034029  | H | -2.474784 | -2.624738 | 2.032177  |
| H | -3.459041 | -1.422351 | 2.920771  | H | -3.445488 | -1.478396 | 2.900916  | H | -3.480558 | -1.480364 | 2.914578  |
| H | -1.906175 | -0.777192 | 2.350082  | H | -1.857542 | -0.917514 | 2.343486  | H | -1.861786 | -0.998282 | 2.377084  |
| H | 0.658374  | -2.918417 | 0.427886  | H | 0.544914  | -2.866955 | 0.363767  | H | 0.482625  | -2.848049 | 0.341943  |
| H | -1.064511 | -2.893883 | 0.117105  | H | -1.179201 | -2.770086 | 0.085326  | H | -1.246042 | -2.704917 | 0.116024  |
| H | 2.339990  | 1.501389  | 1.061738  | H | 2.407798  | 1.466015  | 1.081328  | H | 2.447733  | 1.443901  | 1.095787  |
| H | 1.097617  | 2.511306  | 2.907745  | H | 1.234873  | 2.521208  | 2.945779  | H | 1.322925  | 2.498348  | 2.992149  |
| H | 0.394079  | 0.930346  | 2.526310  | H | 0.449126  | 0.980194  | 2.560795  | H | 0.506936  | 0.973733  | 2.604476  |
| H | -0.424254 | 2.424174  | 2.002918  | H | -0.298055 | 2.517050  | 2.055916  | H | -0.224207 | 2.527172  | 2.127643  |
| H | 0.612466  | 3.816936  | 0.069525  | H | 0.782409  | 3.865990  | 0.117420  | H | 0.843702  | 3.881032  | 0.190415  |
| H | 2.144779  | 3.913034  | 0.954013  | H | 2.324774  | 3.887099  | 0.989858  | H | 2.402985  | 3.866951  | 1.032438  |
| H | 2.115867  | 3.244401  | -0.688833 | H | 2.251807  | 3.228971  | -0.656137 | H | 2.287314  | 3.230108  | -0.619589 |
| H | 4.438170  | -1.873607 | -1.648233 | H | 4.326640  | -1.953933 | -1.707862 | H | 4.243253  | -1.986939 | -1.768112 |
| H | 5.353202  | -0.435955 | -2.079536 | H | 5.296135  | -0.549717 | -2.131044 | H | 5.232170  | -0.596978 | -2.193488 |
| H | 6.462840  | -1.599310 | -0.162592 | H | 6.378360  | -1.788146 | -0.244662 | H | 6.329369  | -1.875724 | -0.345677 |
| H | 5.939415  | -0.678583 | 2.010729  | H | 5.924563  | -0.872520 | 1.946673  | H | 5.929747  | -0.989062 | 1.868473  |
| H | 4.375529  | 0.076841  | 1.364089  | H | 4.387252  | -0.041257 | 1.330305  | H | 4.394206  | -0.125415 | 1.293765  |
| H | -2.942680 | 2.304352  | -0.450738 | H | -2.985915 | 2.275867  | -0.488181 | H | -2.870011 | 2.233336  | -0.681310 |

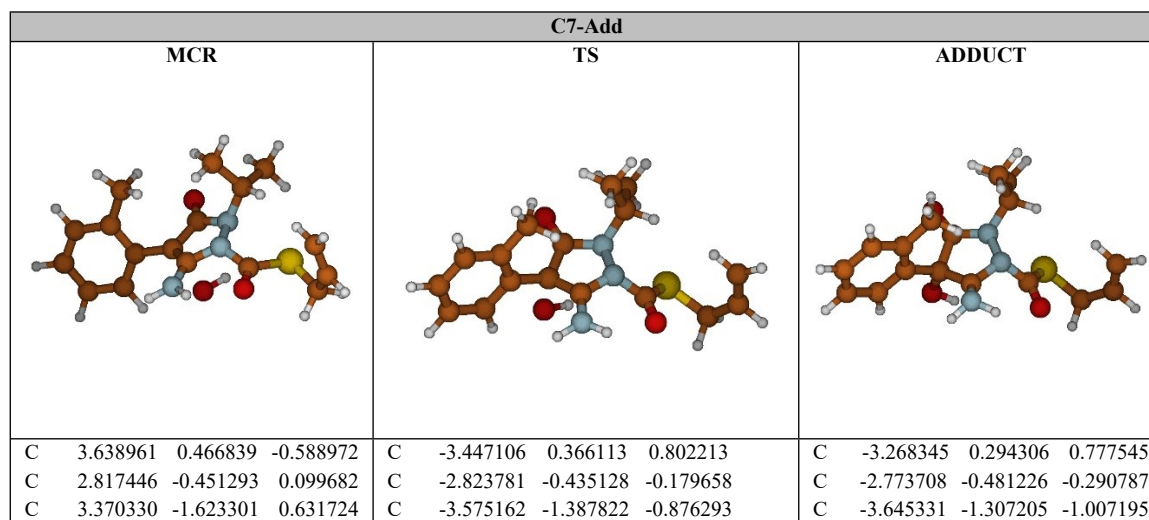

|   |           |           |           |   |           |           |           |   |           |           |           |
|---|-----------|-----------|-----------|---|-----------|-----------|-----------|---|-----------|-----------|-----------|
| C | 4.734065  | -1.883328 | 0.518742  | C | -4.939765 | -1.538924 | -0.634397 | C | -5.001362 | -1.369982 | -0.689075 |
| C | 5.556963  | -0.965862 | -0.131284 | C | -5.565817 | -0.735747 | 0.314492  | C | -5.498248 | -0.604614 | 0.361455  |
| C | 5.007267  | 0.190850  | -0.681046 | C | -4.818327 | 0.202178  | 1.024053  | C | -4.631289 | 0.213838  | 1.082414  |
| C | 1.361818  | -0.204304 | 0.201464  | C | -1.351732 | -0.293788 | -0.403715 | C | -1.292438 | -0.486527 | -0.642664 |
| C | 0.739483  | 0.987023  | 0.753738  | C | -0.727398 | 0.976526  | -0.812444 | C | -0.687413 | 0.920962  | -0.843814 |
| N | -0.633707 | 0.955668  | 0.437939  | N | 0.622883  | 0.937229  | -0.456423 | N | 0.550599  | 0.953226  | -0.278314 |
| N | -0.828991 | -0.146749 | -0.424591 | N | 0.806561  | -0.187618 | 0.378806  | N | 0.771354  | -0.195726 | 0.523006  |
| C | 0.377169  | -0.820544 | -0.594478 | C | -0.409028 | -0.877971 | 0.471695  | C | -0.401495 | -1.023505 | 0.420742  |
| O | 1.259520  | 1.893517  | 1.399090  | O | -1.258748 | 1.927639  | -1.379137 | O | -1.225498 | 1.852167  | -1.432715 |
| N | 0.494555  | -1.893666 | -1.345756 | N | -0.556113 | -1.967787 | 1.207001  | N | -0.781654 | -1.789497 | 1.496696  |
| C | -2.025397 | -0.883585 | -0.304126 | C | 2.006315  | -0.920423 | 0.275912  | C | 1.970468  | -0.911432 | 0.295644  |
| O | -2.243878 | -1.821166 | -1.042999 | O | 2.205897  | -1.865237 | 1.011977  | O | 2.195696  | -1.912577 | 0.945710  |
| C | -1.281953 | 2.214182  | -0.060221 | C | 1.318347  | 2.178595  | 0.010312  | C | 1.279829  | 2.198695  | 0.089022  |
| C | -0.453287 | 2.877472  | -1.152857 | C | 0.521387  | 2.913027  | 1.080126  | C | 0.505356  | 3.030007  | 1.103714  |
| C | 3.078610  | 1.701511  | -1.246059 | C | -2.683291 | 1.377989  | 1.616417  | C | -2.403911 | 1.227180  | 1.585962  |
| S | -3.102512 | -0.340275 | 0.985831  | S | 3.124286  | -0.371175 | -0.978927 | S | 3.049063  | -0.285604 | -0.962853 |
| C | -4.503803 | -1.439050 | 0.630546  | C | 4.522961  | -1.456032 | -0.573841 | C | 4.444524  | -1.418700 | -0.709035 |
| C | -5.338691 | -1.085742 | -0.568264 | C | 5.309601  | -1.092443 | 0.654162  | C | 5.297550  | -1.156410 | 0.500367  |
| C | -5.120486 | -0.115697 | -1.453462 | C | 5.056116  | -0.116722 | 1.523678  | C | 5.103712  | -0.241046 | 1.447529  |
| C | -1.591573 | 3.138938  | 1.106648  | C | 1.667549  | 3.056182  | -1.182575 | C | 1.642467  | 2.994638  | -1.159043 |
| O | 0.700023  | -1.437919 | 1.894244  | O | -1.079797 | -1.252117 | -2.041887 | O | -1.138514 | -1.179816 | -1.895930 |
| H | 5.646807  | 0.893662  | -1.208531 | H | -5.301755 | 0.820543  | 1.775616  | H | -5.013544 | 0.809103  | 1.907508  |
| H | 6.622547  | -1.153725 | -0.221854 | H | -6.628619 | -0.841414 | 0.510076  | H | -6.551073 | -0.644776 | 0.623581  |
| H | 5.148053  | -2.794288 | 0.939106  | H | -5.505395 | -2.282320 | -1.187210 | H | -5.658914 | -2.017581 | -1.260403 |
| H | 2.719934  | -2.324310 | 1.142891  | H | -3.085888 | -2.010483 | -1.613806 | H | -3.260857 | -1.908916 | -1.821186 |
| H | 2.833705  | 2.471769  | -0.507943 | H | -2.358587 | 2.220992  | 0.998681  | H | -2.219247 | 2.156043  | 1.037348  |
| H | 2.160493  | 1.473923  | -1.797813 | H | -1.788038 | 0.939376  | 2.070353  | H | -1.434567 | 0.789956  | 1.841551  |
| H | 3.805890  | 2.120564  | -1.944860 | H | -3.312875 | 1.770863  | 2.417707  | H | -2.906362 | 1.489263  | 2.519841  |
| H | -0.300839 | -2.273601 | -1.845642 | H | 0.206998  | -2.333142 | 1.763488  | H | -0.007139 | -2.222225 | 1.992742  |
| H | 1.382070  | -2.384292 | -1.361929 | H | -1.426065 | -2.484272 | 1.140543  | H | -1.515400 | -2.456986 | 1.275657  |
| H | -2.228117 | 1.875390  | -0.490826 | H | 2.248003  | 1.815705  | 0.455519  | H | 2.201444  | 1.846654  | 0.558337  |
| H | -1.027720 | 3.699462  | -1.588492 | H | 1.140214  | 3.715186  | 1.491632  | H | 1.132099  | 3.870588  | 1.414780  |
| H | -0.215018 | 2.165508  | -1.949729 | H | 0.245562  | 2.238476  | 1.896245  | H | 0.254410  | 2.440398  | 1.989384  |
| H | 0.478603  | 3.284740  | -0.749220 | H | -0.385174 | 3.358980  | 0.662082  | H | -0.412335 | 3.431144  | 0.664868  |
| H | -0.679012 | 3.545142  | 1.547390  | H | 0.770547  | 3.474389  | -1.644116 | H | 0.758805  | 3.453644  | -1.606916 |
| H | -2.197085 | 3.971996  | 0.739199  | H | 2.293933  | 3.882725  | -0.836169 | H | 2.335433  | 3.790281  | -0.872601 |
| H | -2.157655 | 2.614162  | 1.881342  | H | 2.223944  | 2.491666  | -1.935798 | H | 2.130484  | 2.363676  | -1.906279 |
| H | -4.128174 | -2.463120 | 0.550316  | H | 4.154951  | -2.483557 | -0.505415 | H | 4.059274  | -2.442046 | -0.693548 |
| H | -5.113482 | -1.393548 | 1.538746  | H | 5.164228  | -1.405103 | -1.459854 | H | 5.043836  | -1.316689 | -1.619516 |
| H | -6.206842 | -1.733591 | -0.685547 | H | 6.173877  | -1.737498 | 0.809601  | H | 6.156976  | -1.823016 | 0.566397  |
| H | -5.803408 | 0.035165  | -2.283497 | H | 5.706680  | 0.040713  | 2.378126  | H | 5.796920  | -0.153182 | 2.278149  |
| H | -4.268671 | 0.557815  | -1.386428 | H | 4.206800  | 0.555389  | 1.420069  | H | 4.260823  | 0.446909  | 1.431851  |



|   |          |           |          |   |           |           |           |   |           |           |           |
|---|----------|-----------|----------|---|-----------|-----------|-----------|---|-----------|-----------|-----------|
| H | 0.018269 | -0.851328 | 2.263551 | H | -0.149246 | -1.057130 | -2.238670 | H | -0.213826 | -1.460662 | -1.978833 |
|---|----------|-----------|----------|---|-----------|-----------|-----------|---|-----------|-----------|-----------|

| C16-Add                                                                           |           |           |                                                                                    |   |           |                                                                                     |           |   |           |           |           |
|-----------------------------------------------------------------------------------|-----------|-----------|------------------------------------------------------------------------------------|---|-----------|-------------------------------------------------------------------------------------|-----------|---|-----------|-----------|-----------|
| MCR                                                                               |           |           | TS                                                                                 |   |           | ADDUCT                                                                              |           |   |           |           |           |
| 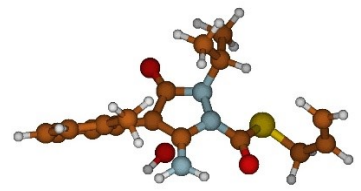 |           |           |  |   |           |  |           |   |           |           |           |
| C                                                                                 | -3.549080 | -0.064219 | -1.387835                                                                          | C | -3.453210 | -0.055293                                                                           | -1.447255 | C | -3.312256 | -1.646319 | -0.665605 |
| C                                                                                 | -2.832447 | -0.247497 | -0.194380                                                                          | C | -2.843741 | -0.199258                                                                           | -0.188625 | C | -2.844331 | -0.412783 | -0.173600 |
| C                                                                                 | -3.521765 | -0.536402 | 1.002757                                                                           | C | -3.622712 | -0.497354                                                                           | 0.947649  | C | -3.760855 | 0.538391  | 0.333447  |
| C                                                                                 | -4.913611 | -0.680335 | 0.944463                                                                           | C | -4.999290 | -0.682806                                                                           | 0.770051  | C | -5.123048 | 0.225404  | 0.292524  |
| C                                                                                 | -5.616922 | -0.523680 | -0.246686                                                                          | C | -5.596025 | -0.566578                                                                           | -0.482003 | C | -5.582510 | -0.984353 | -0.223708 |
| C                                                                                 | -4.932363 | -0.201329 | -1.418830                                                                          | C | -4.821371 | -0.242724                                                                           | -1.597842 | C | -4.672751 | -1.928430 | -0.699166 |
| C                                                                                 | -1.372250 | -0.056835 | -0.213921                                                                          | C | -1.397790 | 0.020585                                                                            | -0.101836 | C | -1.409622 | -0.150073 | -0.168430 |
| C                                                                                 | -0.379542 | -0.891317 | 0.333153                                                                           | C | -0.381705 | -0.872628                                                                           | 0.340567  | C | -0.376321 | -1.066608 | 0.429451  |
| N                                                                                 | 0.837981  | -0.218686 | 0.298750                                                                           | N | 0.839419  | -0.170816                                                                           | 0.357997  | N | 0.854891  | -0.235751 | 0.320376  |
| N                                                                                 | 0.656131  | 1.075617  | -0.238862                                                                          | N | 0.651975  | 1.106154                                                                            | -0.232489 | N | 0.614070  | 0.946238  | -0.428136 |
| C                                                                                 | -0.720231 | 1.201877  | -0.520521                                                                          | C | -0.720928 | 1.238973                                                                            | -0.504047 | C | -0.751000 | 1.016248  | -0.715818 |
| N                                                                                 | -0.493160 | -2.136466 | 0.742836                                                                           | N | -0.526848 | -2.013662                                                                           | 1.014710  | N | -0.666273 | -1.375558 | 1.795012  |
| O                                                                                 | -1.228643 | 2.246388  | -0.917814                                                                          | O | -1.225545 | 2.269659                                                                            | -0.942876 | O | -1.268780 | 1.953256  | -1.323673 |
| C                                                                                 | 1.276290  | 2.140555  | 0.623089                                                                           | C | 1.295346  | 2.203666                                                                            | 0.569240  | C | 1.258932  | 2.171586  | 0.152251  |
| C                                                                                 | 0.425609  | 2.425717  | 1.854655                                                                           | C | 0.457825  | 2.562769                                                                            | 1.790754  | C | 0.417893  | 2.767444  | 1.275470  |
| C                                                                                 | 2.023101  | -0.906869 | -0.014836                                                                          | C | 1.998650  | -0.879689                                                                           | -0.006025 | C | 2.051062  | -0.899057 | 0.123834  |
| O                                                                                 | 2.229135  | -2.016482 | 0.434806                                                                           | O | 2.192697  | -2.001308                                                                           | 0.419716  | O | 2.329186  | -1.892274 | 0.775976  |
| C                                                                                 | -2.828177 | -0.656704 | 2.336389                                                                           | C | -3.038913 | -0.579812                                                                           | 2.335190  | C | -3.319828 | 1.833198  | 0.966377  |
| C                                                                                 | 1.576237  | 3.379351  | -0.205477                                                                          | C | 1.605943  | 3.396280                                                                            | -0.320984 | C | 1.579605  | 3.174879  | -0.945132 |
| S                                                                                 | 3.125488  | -0.033519 | -1.084410                                                                          | S | 3.104117  | -0.015448                                                                           | -1.080717 | S | 3.123432  | -0.209694 | -1.119476 |
| C                                                                                 | 4.530751  | -1.180006 | -0.997881                                                                          | C | 4.480110  | -1.198953                                                                           | -1.044563 | C | 4.573705  | -1.262687 | -0.836979 |
| C                                                                                 | 5.325406  | -1.161670 | 0.277887                                                                           | C | 5.301842  | -1.226470                                                                           | 0.213752  | C | 5.398830  | -0.947991 | 0.379403  |
| C                                                                                 | 5.066960  | -0.470504 | 1.385992                                                                           | C | 5.084478  | -0.550873                                                                           | 1.340160  | C | 5.144774  | -0.039964 | 1.319538  |
| O                                                                                 | -0.592411 | -0.821750 | -2.180904                                                                          | O | -0.297321 | -1.322199                                                                           | -1.622025 | O | -0.193477 | -2.194849 | -0.408550 |
| H                                                                                 | -5.451646 | -0.902486 | 1.862405                                                                           | H | -5.610584 | -0.906813                                                                           | 1.640439  | H | -5.833402 | 0.944107  | 0.692380  |

|   |           |           |           |   |           |           |           |   |           |           |           |
|---|-----------|-----------|-----------|---|-----------|-----------|-----------|---|-----------|-----------|-----------|
| H | -6.696437 | -0.638945 | -0.256663 | H | -6.666492 | -0.715291 | -0.585613 | H | -6.647571 | -1.194010 | -0.241808 |
| H | -5.470225 | -0.061082 | -2.350993 | H | -5.279956 | -0.138334 | -2.575765 | H | -5.018674 | -2.877471 | -1.095526 |
| H | -3.004367 | 0.178431  | -2.295166 | H | -2.834353 | 0.188776  | -2.306352 | H | -2.601030 | -2.368917 | -1.051290 |
| H | -2.478173 | -1.678282 | 2.518660  | H | -2.812519 | -1.615610 | 2.609264  | H | -2.385336 | 1.711917  | 1.522321  |
| H | -3.523164 | -0.401931 | 3.139653  | H | -3.759059 | -0.199603 | 3.063896  | H | -4.087095 | 2.188132  | 1.658099  |
| H | -1.963132 | 0.009828  | 2.407410  | H | -2.117975 | 0.002456  | 2.426513  | H | -3.157895 | 2.610028  | 0.213295  |
| H | 0.313840  | -2.658286 | 1.063472  | H | 0.298391  | -2.589287 | 1.143087  | H | 0.066626  | -1.979047 | 2.167027  |
| H | -1.389836 | -2.600696 | 0.651100  | H | -1.409188 | -2.499110 | 0.892468  | H | -1.555312 | -1.873574 | 1.844543  |
| H | 2.226139  | 1.704252  | 0.943104  | H | 2.240861  | 1.769226  | 0.903072  | H | 2.199147  | 1.805194  | 0.570487  |
| H | 0.971793  | 3.097839  | 2.521865  | H | 1.023394  | 3.248656  | 2.427011  | H | 0.990437  | 3.555564  | 1.772151  |
| H | 0.208425  | 1.503183  | 2.403291  | H | 0.219050  | 1.669247  | 2.377263  | H | 0.163603  | 2.006345  | 2.020240  |
| H | -0.518180 | 2.907609  | 1.581239  | H | -0.474649 | 3.056442  | 1.500008  | H | -0.505611 | 3.208424  | 0.887719  |
| H | 0.660853  | 3.891170  | -0.508534 | H | 0.694748  | 3.903111  | -0.644557 | H | 0.670339  | 3.609027  | -1.365962 |
| H | 2.170210  | 4.067782  | 0.401996  | H | 2.210777  | 4.106986  | 0.249014  | H | 2.179613  | 3.982117  | -0.515804 |
| H | 2.152017  | 3.120923  | -1.098627 | H | 2.174000  | 3.087797  | -1.203145 | H | 2.154123  | 2.705795  | -1.748584 |
| H | 4.168256  | -2.189627 | -1.211183 | H | 4.086053  | -2.194560 | -1.268028 | H | 4.246627  | -2.305983 | -0.816689 |
| H | 5.165838  | -0.885734 | -1.839990 | H | 5.105646  | -0.906932 | -1.894579 | H | 5.179858  | -1.137353 | -1.740161 |
| H | 6.198976  | -1.812034 | 0.243357  | H | 6.157084  | -1.898516 | 0.148484  | H | 6.293909  | -1.564540 | 0.458968  |
| H | 5.722552  | -0.547096 | 2.247692  | H | 5.755335  | -0.661346 | 2.186310  | H | 5.823223  | 0.091023  | 2.156710  |
| H | 4.207948  | 0.191095  | 1.476809  | H | 4.244767  | 0.130407  | 1.461132  | H | 4.264729  | 0.599055  | 1.290613  |
| H | -1.298592 | -1.488915 | -2.206215 | H | -1.112730 | -1.830480 | -1.763597 | H | -0.603142 | -2.967607 | 0.008957  |

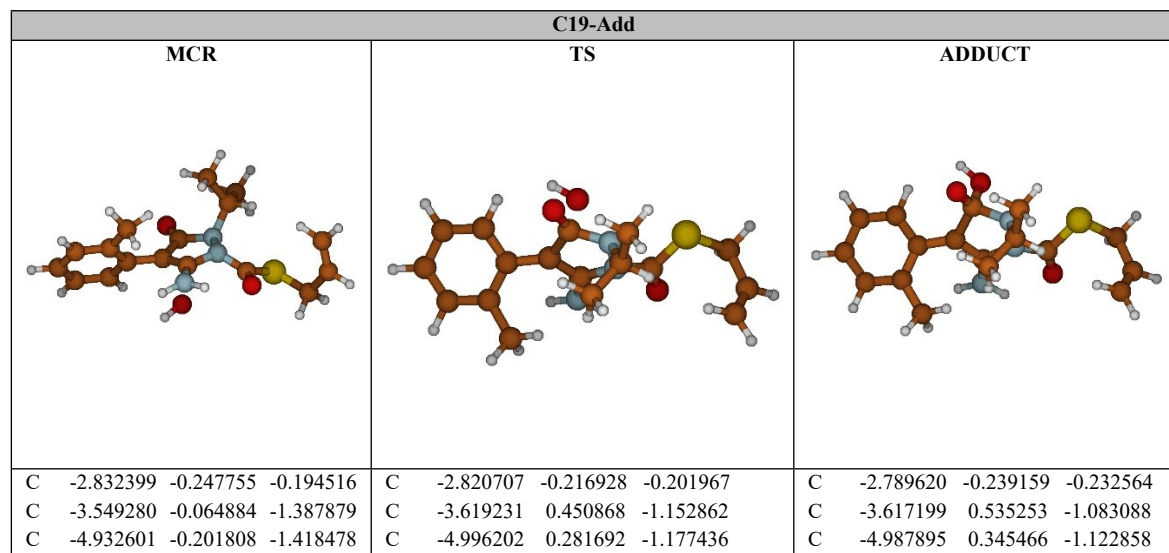

|   |           |           |           |   |           |           |           |   |           |           |           |
|---|-----------|-----------|-----------|---|-----------|-----------|-----------|---|-----------|-----------|-----------|
| C | -5.616937 | -0.523600 | -0.246051 | C | -5.604771 | -0.547841 | -0.234177 | C | -5.573995 | -0.606175 | -0.284246 |
| C | -4.913363 | -0.679867 | 0.944993  | C | -4.829044 | -1.175297 | 0.735418  | C | -4.779726 | -1.341857 | 0.589897  |
| C | -3.521488 | -0.536091 | 1.002887  | C | -3.438616 | -1.023504 | 0.784458  | C | -3.391572 | -1.182447 | 0.645029  |
| C | -1.372172 | -0.057241 | -0.214426 | C | -1.381026 | 0.004461  | -0.231653 | C | -1.370393 | 0.011738  | -0.296512 |
| C | -2.827573 | -0.656038 | 2.336389  | C | -2.689796 | -1.671410 | 1.922917  | C | -2.636169 | -1.978398 | 1.679304  |
| H | -5.451185 | -0.901589 | 1.863164  | H | -5.308493 | -1.787300 | 1.494866  | H | -5.244660 | -2.052472 | 1.267956  |
| H | -6.696468 | -0.638739 | -0.255718 | H | -6.680951 | -0.689770 | -0.242000 | H | -6.648257 | -0.761498 | -0.298835 |
| H | -5.470642 | -0.061874 | -2.350585 | H | -5.589852 | 0.793770  | -1.927562 | H | -5.597286 | 0.935353  | -1.799360 |
| H | -3.004786 | 0.177335  | -2.295451 | H | -3.151976 | 1.098796  | -1.886566 | H | -3.164263 | 1.270727  | -1.737703 |
| H | -1.962180 | 0.010097  | 2.406828  | H | -1.773343 | -1.133641 | 2.177701  | H | -1.706383 | -1.498281 | 1.985839  |
| H | -2.478052 | -1.677711 | 2.519075  | H | -2.424085 | -2.708928 | 1.694262  | H | -2.398155 | -2.983785 | 1.315310  |
| H | -3.522194 | -0.400510 | 3.139732  | H | -3.326981 | -1.691162 | 2.810156  | H | -3.261124 | -2.099765 | 2.567193  |
| C | -0.379456 | -0.891432 | 0.333048  | C | -0.332760 | -0.943975 | -0.081483 | C | -0.298960 | -0.926296 | -0.246897 |
| N | 0.837976  | -0.218635 | 0.298738  | N | 0.866092  | -0.264420 | -0.010977 | N | 0.886163  | -0.228283 | -0.158715 |
| N | 0.656023  | 1.075576  | -0.239064 | N | 0.685289  | 1.135347  | -0.090313 | N | 0.687838  | 1.166389  | -0.011969 |
| C | -0.720332 | 1.201655  | -0.520827 | C | -0.707281 | 1.296074  | -0.476077 | C | -0.704325 | 1.386745  | -0.601274 |
| O | -1.228881 | 2.246077  | -0.918137 | O | -1.227599 | 2.413935  | -0.524643 | O | -1.319192 | 2.453568  | -0.206727 |
| N | -0.492969 | -2.136509 | 0.742963  | N | -0.420869 | -2.252025 | -0.120623 | N | -0.357404 | -2.228244 | -0.408797 |
| H | 0.314087  | -2.658220 | 1.063648  | H | 0.408263  | -2.831895 | -0.038163 | H | 0.491897  | -2.785513 | -0.422173 |
| H | -1.389586 | -2.600859 | 0.651249  | H | -1.321473 | -2.683540 | -0.297846 | H | -1.250451 | -2.669758 | -0.599170 |
| C | 1.276089  | 2.140699  | 0.622713  | C | 1.046070  | 1.780851  | 1.220909  | C | 0.901201  | 1.544609  | 1.418551  |
| C | 0.425413  | 2.425925  | 1.854259  | C | 0.054627  | 1.478706  | 2.339907  | C | -0.110949 | 0.971335  | 2.408328  |
| C | 1.575847  | 3.379411  | -0.206055 | C | 1.278746  | 3.270790  | 1.021410  | C | 1.063693  | 3.053528  | 1.556099  |
| H | 2.226024  | 1.704585  | 0.942736  | H | 2.007112  | 1.322170  | 1.475422  | H | 1.875615  | 1.097983  | 1.650722  |
| H | 0.971504  | 3.098223  | 2.521366  | H | 0.433540  | 1.904322  | 3.273296  | H | 0.162623  | 1.294555  | 3.417381  |
| H | 0.208368  | 1.503442  | 2.403032  | H | -0.065275 | 0.400922  | 2.490592  | H | -0.096095 | -0.122759 | 2.404775  |
| H | -0.518455 | 2.907637  | 1.580797  | H | -0.926382 | 1.921697  | 2.137742  | H | -1.128308 | 1.318098  | 2.202048  |
| H | 0.660383  | 3.890973  | -0.509299 | H | 0.344329  | 3.805430  | 0.840499  | H | 0.107676  | 3.573188  | 1.479656  |
| H | 2.169616  | 4.068081  | 0.401346  | H | 1.736396  | 3.676175  | 1.928220  | H | 1.498378  | 3.269990  | 2.536390  |
| H | 2.151772  | 3.120922  | -1.099093 | H | 1.957773  | 3.448922  | 0.182730  | H | 1.739528  | 3.443155  | 0.789082  |
| C | 2.023118  | -0.906839 | -0.014733 | C | 2.090214  | -0.817182 | -0.389816 | C | 2.130576  | -0.726246 | -0.525731 |
| O | 2.229102  | -2.016394 | 0.435067  | O | 2.283107  | -2.017097 | -0.322548 | O | 2.332410  | -1.924484 | -0.626375 |
| S | 3.125581  | -0.033647 | -1.084368 | S | 3.277018  | 0.367083  | -0.949495 | S | 3.339988  | 0.529532  | -0.823967 |
| C | 4.530872  | -1.180057 | -0.997555 | C | 4.699735  | -0.752778 | -1.091099 | C | 4.765495  | -0.559046 | -1.109121 |
| C | 5.325480  | -1.161424 | 0.278232  | C | 5.337232  | -1.184268 | 0.200206  | C | 5.369354  | -1.200386 | 0.109272  |
| C | 5.067040  | -0.469878 | 1.386104  | C | 4.922903  | -0.921225 | 1.437786  | C | 4.917642  | -1.149440 | 1.360663  |
| H | 4.168461  | -2.189743 | -1.210695 | H | 4.400421  | -1.623988 | -1.680783 | H | 4.483305  | -1.319917 | -1.842816 |
| H | 5.165981  | -0.885916 | -1.839698 | H | 5.421151  | -0.192961 | -1.695230 | H | 5.503241  | 0.089005  | -1.593492 |
| H | 6.198978  | -1.811893 | 0.243934  | H | 6.233464  | -1.785951 | 0.051640  | H | 6.273676  | -1.766989 | -0.111280 |
| H | 5.722555  | -0.546271 | 2.247879  | H | 5.474042  | -1.296691 | 2.294245  | H | 5.446066  | -1.661925 | 2.158414  |
| H | 4.208058  | 0.191800  | 1.476646  | H | 4.033977  | -0.328475 | 1.643859  | H | 4.018318  | -0.601926 | 1.635348  |
| O | -0.592821 | -0.821978 | -2.180979 | O | -0.432026 | 0.553067  | -2.279780 | O | -0.417096 | 1.361737  | -2.029797 |

|   |           |           |           |   |           |          |           |   |           |          |           |
|---|-----------|-----------|-----------|---|-----------|----------|-----------|---|-----------|----------|-----------|
| H | -1.297511 | -1.490745 | -2.205709 | H | -1.275949 | 0.723007 | -2.724660 | H | -1.153243 | 1.829088 | -2.451355 |
|---|-----------|-----------|-----------|---|-----------|----------|-----------|---|-----------|----------|-----------|

| C34-Add                                                                           |           |           |                                                                                    |   |           |                                                                                     |           |   |           |           |           |
|-----------------------------------------------------------------------------------|-----------|-----------|------------------------------------------------------------------------------------|---|-----------|-------------------------------------------------------------------------------------|-----------|---|-----------|-----------|-----------|
| MCR                                                                               |           |           | TS                                                                                 |   |           | ADDUCT                                                                              |           |   |           |           |           |
| 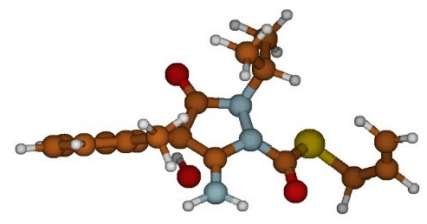 |           |           |  |   |           |  |           |   |           |           |           |
| C                                                                                 | -3.575502 | -0.060424 | -1.377307                                                                          | C | -3.518465 | 0.414688                                                                            | -1.290826 | C | -3.648006 | 0.622354  | -1.074487 |
| C                                                                                 | -2.833913 | -0.256092 | -0.201583                                                                          | C | -2.883492 | -0.124203                                                                           | -0.138850 | C | -2.883787 | -0.109425 | -0.128384 |
| C                                                                                 | -3.501124 | -0.541791 | 1.008995                                                                           | C | -3.656374 | -0.798977                                                                           | 0.850469  | C | -3.535426 | -0.975126 | 0.795179  |
| C                                                                                 | -4.895334 | -0.673579 | 0.980192                                                                           | C | -5.019200 | -0.962366                                                                           | 0.607809  | C | -4.918538 | -1.116991 | 0.687478  |
| C                                                                                 | -5.622930 | -0.505019 | -0.194267                                                                          | C | -5.620975 | -0.479716                                                                           | -0.553405 | C | -5.652882 | -0.435445 | -0.281960 |
| C                                                                                 | -4.960256 | -0.183514 | -1.379223                                                                          | C | -4.868636 | 0.220050                                                                            | -1.504913 | C | -5.015958 | 0.445312  | -1.163495 |
| C                                                                                 | -1.373143 | -0.074319 | -0.247208                                                                          | C | -1.470493 | 0.066431                                                                            | -0.038539 | C | -1.466423 | 0.090895  | -0.147598 |
| C                                                                                 | -0.377529 | -0.906544 | 0.303768                                                                           | C | -0.442332 | -0.845377                                                                           | 0.367758  | C | -0.388996 | -0.858654 | -0.040675 |
| N                                                                                 | 0.834098  | -0.226733 | 0.286803                                                                           | N | 0.774172  | -0.202843                                                                           | 0.337961  | N | 0.810713  | -0.221783 | -0.041026 |
| N                                                                                 | 0.650703  | 1.069825  | -0.242008                                                                          | N | 0.590566  | 1.125593                                                                            | -0.102816 | N | 0.576968  | 1.171601  | -0.195663 |
| C                                                                                 | -0.724277 | 1.191060  | -0.533363                                                                          | C | -0.760895 | 1.309882                                                                            | -0.385438 | C | -0.796996 | 1.387782  | -0.313472 |
| N                                                                                 | -0.487169 | -2.159570 | 0.683521                                                                           | N | -0.567351 | -2.123340                                                                           | 0.604413  | N | -0.513215 | -2.167677 | -0.092041 |
| O                                                                                 | -1.235145 | 2.237752  | -0.925503                                                                          | O | -1.254486 | 2.374298                                                                            | -0.729995 | O | -1.324186 | 2.490380  | -0.403589 |
| C                                                                                 | 1.261631  | 2.133051  | 0.628354                                                                           | C | 1.271728  | 2.148462                                                                            | 0.762351  | C | 1.291052  | 2.023673  | 0.815940  |
| C                                                                                 | 0.399340  | 2.413344  | 1.852835                                                                           | C | 0.440079  | 2.455725                                                                            | 2.001695  | C | 0.556248  | 2.014280  | 2.151881  |
| C                                                                                 | 2.029505  | -0.905089 | -0.013530                                                                          | C | 1.865638  | -0.942060                                                                           | -0.278271 | C | 1.877633  | -0.850176 | -1.095434 |
| O                                                                                 | 2.240603  | -2.010856 | 0.442151                                                                           | O | 2.098848  | -2.068071                                                                           | 0.123693  | O | 2.039462  | -2.090559 | -0.876652 |
| C                                                                                 | -2.782502 | -0.672721 | 2.328479                                                                           | C | -3.098533 | -1.244922                                                                           | 2.177333  | C | -2.821368 | -1.658698 | 1.932681  |
| C                                                                                 | 1.566784  | 3.374134  | -0.194882                                                                          | C | 1.617791  | 3.384969                                                                            | -0.051627 | C | 1.539315  | 3.421303  | 0.270815  |
| S                                                                                 | 3.129650  | -0.026091 | -1.079826                                                                          | S | 3.101590  | 0.105563                                                                            | -1.055897 | S | 3.444912  | 0.210795  | -0.964078 |
| C                                                                                 | 4.543567  | -1.161205 | -0.982547                                                                          | C | 4.509504  | -1.035044                                                                           | -0.949337 | C | 4.612078  | -1.008718 | -0.297843 |
| C                                                                                 | 5.331319  | -1.131935 | 0.297295                                                                           | C | 5.157274  | -1.185139                                                                           | 0.398929  | C | 4.550137  | -1.314123 | 1.171636  |
| C                                                                                 | 5.062761  | -0.437237 | 1.400767                                                                           | C | 4.755513  | -0.659732                                                                           | 1.554561  | C | 3.595948  | -0.962831 | 2.032350  |

|   |           |           |           |   |           |           |           |   |           |           |           |
|---|-----------|-----------|-----------|---|-----------|-----------|-----------|---|-----------|-----------|-----------|
| O | -0.649048 | -0.989183 | -2.167768 | O | 0.639066  | -1.280801 | -2.046768 | O | 1.286222  | -0.578572 | -2.351969 |
| H | -5.415057 | -0.894639 | 1.908892  | H | -5.625907 | -1.457317 | 1.360786  | H | -5.432291 | -1.759227 | 1.397287  |
| H | -6.703442 | -0.610242 | -0.181637 | H | -6.684698 | -0.630915 | -0.707999 | H | -6.727820 | -0.575900 | -0.337284 |
| H | -5.516305 | -0.033408 | -2.299089 | H | -5.338895 | 0.604644  | -2.403235 | H | -5.587440 | 0.984774  | -1.911000 |
| H | -3.052354 | 0.180143  | -2.297510 | H | -2.916236 | 0.935730  | -2.027245 | H | -3.135896 | 1.288249  | -1.760675 |
| H | -1.916243 | -0.006629 | 2.389022  | H | -2.171718 | -0.730033 | 2.438123  | H | -1.888011 | -1.158616 | 2.200621  |
| H | -2.429072 | -1.695564 | 2.496176  | H | -2.914385 | -2.324374 | 2.189729  | H | -2.597992 | -2.703598 | 1.694221  |
| H | -3.462346 | -0.423883 | 3.146408  | H | -3.831616 | -1.038113 | 2.960633  | H | -3.468895 | -1.661809 | 2.812618  |
| H | 0.314563  | -2.679332 | 1.020638  | H | 0.262790  | -2.690208 | 0.763089  | H | 0.336656  | -2.717284 | -0.220899 |
| H | -1.383030 | -2.623496 | 0.581472  | H | -1.463800 | -2.579519 | 0.468837  | H | -1.423659 | -2.584186 | -0.247925 |
| H | 2.209205  | 1.697327  | 0.955921  | H | 2.199152  | 1.658110  | 1.064461  | H | 2.254674  | 1.531400  | 0.933043  |
| H | 0.937354  | 3.086995  | 2.525111  | H | 1.024891  | 3.083500  | 2.679139  | H | 1.179842  | 2.497486  | 2.909033  |
| H | 0.181437  | 1.489369  | 2.398676  | H | 0.172654  | 1.535651  | 2.532235  | H | 0.356581  | 0.987593  | 2.478898  |
| H | -0.544089 | 2.891663  | 1.572075  | H | -0.475678 | 2.995299  | 1.741495  | H | -0.392170 | 2.557904  | 2.093918  |
| H | 0.653148  | 3.884537  | -0.505527 | H | 0.720933  | 3.934584  | -0.344795 | H | 0.611712  | 3.986286  | 0.159958  |
| H | 2.153684  | 4.062631  | 0.419315  | H | 2.238370  | 4.042421  | 0.563469  | H | 2.185682  | 3.956410  | 0.972471  |
| H | 2.151343  | 3.118522  | -1.083121 | H | 2.181208  | 3.116963  | -0.949541 | H | 2.045962  | 3.375483  | -0.697583 |
| H | 4.190020  | -2.174324 | -1.194221 | H | 4.198016  | -2.010767 | -1.334381 | H | 4.500899  | -1.934457 | -0.871291 |
| H | 5.180645  | -0.864596 | -1.822321 | H | 5.233209  | -0.632902 | -1.666215 | H | 5.600088  | -0.605889 | -0.545272 |
| H | 6.209213  | -1.776788 | 0.270107  | H | 6.048489  | -1.812416 | 0.378185  | H | 5.391560  | -1.910664 | 1.526457  |
| H | 5.714399  | -0.505549 | 2.266145  | H | 5.310804  | -0.845663 | 2.468664  | H | 3.653240  | -1.257731 | 3.075908  |
| H | 4.199002  | 0.219154  | 1.484112  | H | 3.869880  | -0.032107 | 1.630351  | H | 2.729003  | -0.384286 | 1.723117  |
| H | -0.871568 | -0.223517 | -2.723341 | H | 1.219165  | -0.946867 | -2.741965 | H | 1.192263  | 0.377898  | -2.489265 |

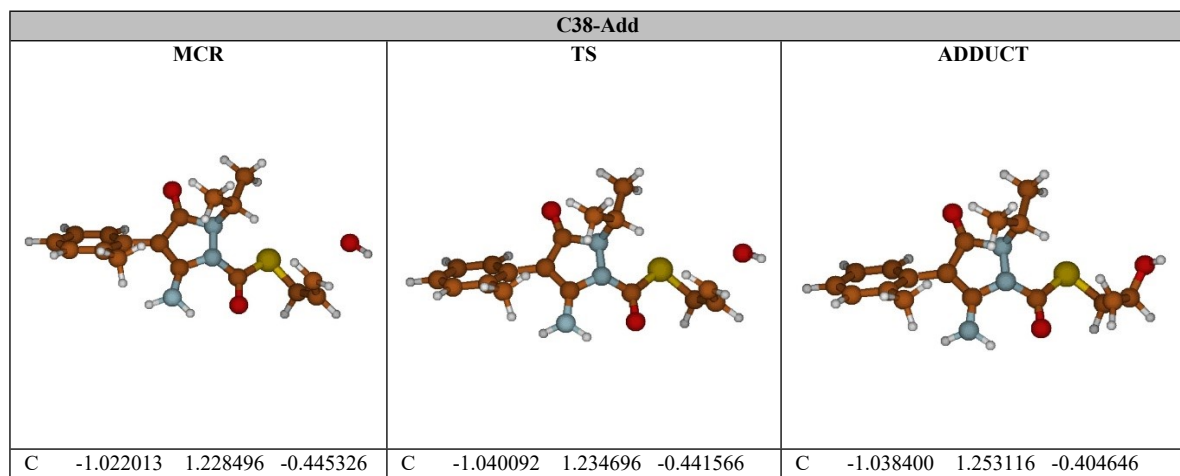

|   |           |           |           |   |           |           |           |   |           |           |           |
|---|-----------|-----------|-----------|---|-----------|-----------|-----------|---|-----------|-----------|-----------|
| C | -1.726375 | 0.015807  | -0.178191 | C | -1.726628 | 0.010827  | -0.178777 | C | -1.716671 | 0.016684  | -0.184123 |
| C | -0.783503 | -0.931582 | 0.171792  | C | -0.770873 | -0.922452 | 0.173607  | C | -0.753744 | -0.922616 | 0.132202  |
| N | 0.488701  | -0.340386 | 0.159621  | N | 0.492361  | -0.311647 | 0.166387  | N | 0.504327  | -0.303624 | 0.146106  |
| N | 0.370548  | 1.007019  | -0.244044 | N | 0.355244  | 1.034479  | -0.235530 | N | 0.357619  | 1.053870  | -0.210981 |
| C | -3.185923 | -0.153523 | -0.293863 | C | -3.183247 | -0.179338 | -0.299304 | C | -3.172292 | -0.178631 | -0.308132 |
| C | -3.802523 | 0.172459  | -1.512543 | C | -3.799979 | 0.137584  | -1.520265 | C | -3.794257 | 0.180181  | -1.514959 |
| C | -5.178318 | 0.051020  | -1.676983 | C | -5.173667 | -0.001018 | -1.688885 | C | -5.167292 | 0.038854  | -1.686130 |
| C | -5.958849 | -0.406452 | -0.614011 | C | -5.951806 | -0.466833 | -0.627801 | C | -5.940045 | -0.472150 | -0.641985 |
| C | -5.355843 | -0.719910 | 0.601122  | C | -5.348755 | -0.771686 | 0.589513  | C | -5.332204 | -0.818667 | 0.561653  |
| C | -3.973242 | -0.593340 | 0.790015  | C | -3.968430 | -0.627908 | 0.782541  | C | -3.952385 | -0.673197 | 0.757351  |
| C | -3.378034 | -0.908302 | 2.138301  | C | -3.373494 | -0.934327 | 2.132916  | C | -3.353659 | -1.027986 | 2.094231  |
| N | -0.942367 | -2.226616 | 0.436462  | N | -0.910444 | -2.220155 | 0.435145  | N | -0.886708 | -2.230341 | 0.344481  |
| C | 1.632203  | -1.050701 | -0.207119 | C | 1.647390  | -1.003151 | -0.197716 | C | 1.670060  | -0.977835 | -0.220711 |
| S | 2.789619  | -0.138301 | -1.190556 | S | 2.792416  | -0.069497 | -1.177776 | S | 2.806140  | -0.016878 | -1.182717 |
| C | 4.131776  | -1.358711 | -1.207850 | C | 4.146743  | -1.274630 | -1.209953 | C | 4.219882  | -1.162065 | -1.178048 |
| C | 4.925606  | -1.489912 | 0.059464  | C | 4.974693  | -1.374392 | 0.035802  | C | 5.189688  | -0.941106 | -0.012482 |
| O | 6.003273  | 0.935675  | -0.060172 | O | 6.023689  | 0.608347  | -0.125521 | O | 5.772561  | 0.348886  | -0.205329 |
| C | 1.045942  | 1.934233  | 0.730178  | C | 1.012372  | 1.970149  | 0.743322  | C | 1.016848  | 1.961862  | 0.791435  |
| C | 1.390418  | 3.253127  | 0.057302  | C | 1.340125  | 3.295110  | 0.074025  | C | 1.341050  | 3.305484  | 0.158659  |
| O | -1.460671 | 2.344563  | -0.753123 | O | -1.494992 | 2.344244  | -0.748822 | O | -1.501499 | 2.370667  | -0.670465 |
| C | 0.226445  | 2.100826  | 2.004202  | C | 0.185317  | 2.122181  | 2.014267  | C | 0.193669  | 2.077287  | 2.068876  |
| O | 1.792658  | -2.207359 | 0.138593  | O | 1.828063  | -2.156494 | 0.148610  | O | 1.846517  | -2.138231 | 0.105575  |
| C | 4.679883  | -0.903591 | 1.236418  | C | 4.672209  | -0.878713 | 1.256098  | C | 4.564346  | -1.060217 | 1.332852  |
| H | -5.967176 | -1.056905 | 1.434622  | H | -5.958497 | -1.115272 | 1.421489  | H | -5.937783 | -1.197559 | 1.381288  |
| H | -7.033686 | -0.509639 | -0.728270 | H | -7.024971 | -0.583148 | -0.745157 | H | -7.012661 | -0.591261 | -0.761554 |
| H | -5.637089 | 0.306087  | -2.627177 | H | -5.632596 | 0.247558  | -2.640718 | H | -5.629884 | 0.320048  | -2.627061 |
| H | -3.184041 | 0.517783  | -2.336867 | H | -3.183268 | 0.490063  | -2.342888 | H | -3.181679 | 0.567489  | -2.324926 |
| H | -2.495491 | -0.294222 | 2.341030  | H | -2.499612 | -0.308770 | 2.338093  | H | -2.475295 | -0.414944 | 2.316842  |
| H | -3.072757 | -1.958430 | 2.206399  | H | -3.054911 | -1.980435 | 2.202461  | H | -3.041760 | -2.077969 | 2.127115  |
| H | -4.113999 | -0.731549 | 2.926367  | H | -4.114170 | -0.766775 | 2.918575  | H | -4.090294 | -0.882487 | 2.888107  |
| H | -0.143618 | -2.819975 | 0.616996  | H | -0.104713 | -2.801240 | 0.624018  | H | -0.078150 | -2.813287 | 0.514181  |
| H | -1.853213 | -2.642656 | 0.291375  | H | -1.815395 | -2.649028 | 0.290463  | H | -1.790447 | -2.657268 | 0.187469  |
| H | 1.981613  | 1.426782  | 0.979166  | H | 1.954405  | 1.476310  | 0.995647  | H | 1.960205  | 1.462085  | 1.026087  |
| H | 0.812130  | 2.658214  | 2.740212  | H | 0.760026  | 2.686419  | 2.753697  | H | 0.770583  | 2.620016  | 2.822583  |
| H | -0.027213 | 1.127454  | 2.437650  | H | -0.055927 | 1.144352  | 2.444788  | H | -0.046415 | 1.087370  | 2.471650  |
| H | -0.697635 | 2.654908  | 1.811375  | H | -0.745888 | 2.663275  | 1.818891  | H | -0.738223 | 2.623500  | 1.892098  |
| H | 0.495825  | 3.837443  | -0.166141 | H | 0.437964  | 3.866426  | -0.152568 | H | 0.437378  | 3.880406  | -0.052394 |
| H | 2.021795  | 3.834990  | 0.734777  | H | 1.959685  | 3.885204  | 0.755251  | H | 1.959149  | 3.878687  | 0.855512  |
| H | 1.944366  | 3.083295  | -0.870444 | H | 1.900712  | 3.135149  | -0.851481 | H | 1.901922  | 3.171756  | -0.770842 |
| H | 3.718710  | -2.328180 | -1.501453 | H | 3.735844  | -2.256773 | -1.462008 | H | 3.839651  | -2.184428 | -1.173477 |
| H | 4.785196  | -1.030592 | -2.022669 | H | 4.776881  | -0.963191 | -2.047654 | H | 4.740065  | -0.983940 | -2.123188 |
| H | 5.782853  | -2.155723 | -0.035909 | H | 5.851977  | -2.009182 | -0.074203 | H | 5.962690  | -1.714698 | -0.125152 |



|   |          |           |          |   |          |           |          |   |          |           |          |
|---|----------|-----------|----------|---|----------|-----------|----------|---|----------|-----------|----------|
| H | 3.832804 | -0.239309 | 1.391922 | H | 3.791359 | -0.266867 | 1.432407 | H | 4.069403 | -0.201788 | 1.775282 |
| H | 5.327691 | -1.087658 | 2.087821 | H | 5.322566 | -1.074652 | 2.102167 | H | 4.495002 | -2.025524 | 1.818589 |
| H | 6.782873 | 0.517901  | 0.354018 | H | 6.754398 | 0.388410  | 0.480065 | H | 6.373414 | 0.519949  | 0.533519 |

| C39-Add                                                                           |                                                                                    |                                                                                     |           |   |           |           |           |   |           |           |           |
|-----------------------------------------------------------------------------------|------------------------------------------------------------------------------------|-------------------------------------------------------------------------------------|-----------|---|-----------|-----------|-----------|---|-----------|-----------|-----------|
| MCR                                                                               | TS                                                                                 | ADDUCT                                                                              |           |   |           |           |           |   |           |           |           |
| 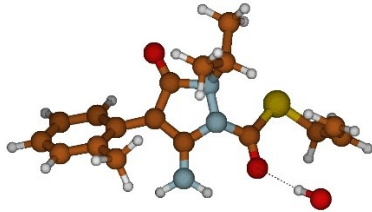 |  |  |           |   |           |           |           |   |           |           |           |
| C                                                                                 | -3.766086                                                                          | -0.962500                                                                           | 0.708935  | C | -3.780269 | -0.936037 | 0.705847  | C | -3.766224 | -1.003179 | 0.704741  |
| C                                                                                 | -3.080233                                                                          | -0.264990                                                                           | -0.306649 | C | -3.088443 | -0.233443 | -0.302126 | C | -3.090156 | -0.289072 | -0.305925 |
| C                                                                                 | -3.780926                                                                          | 0.177469                                                                            | -1.440064 | C | -3.788462 | 0.242225  | -1.422387 | C | -3.797030 | 0.150005  | -1.436891 |
| C                                                                                 | -5.140352                                                                          | -0.076518                                                                           | -1.588663 | C | -5.153351 | 0.016035  | -1.565896 | C | -5.152422 | -0.123342 | -1.587956 |
| C                                                                                 | -5.818552                                                                          | -0.786525                                                                           | -0.596550 | C | -5.837880 | -0.698882 | -0.581703 | C | -5.820437 | -0.849922 | -0.600950 |
| C                                                                                 | -5.132598                                                                          | -1.218233                                                                           | 0.535568  | C | -5.152454 | -1.163222 | 0.537766  | C | -5.128601 | -1.278532 | 0.528746  |
| C                                                                                 | -1.646186                                                                          | 0.056219                                                                            | -0.197608 | C | -1.647883 | 0.059013  | -0.198108 | C | -1.661216 | 0.052881  | -0.194062 |
| C                                                                                 | -1.098427                                                                          | 1.372065                                                                            | -0.283826 | C | -1.075672 | 1.365802  | -0.263135 | C | -1.132617 | 1.376633  | -0.274081 |
| N                                                                                 | 0.317870                                                                           | 1.293729                                                                            | -0.143808 | N | 0.340348  | 1.257468  | -0.139052 | N | 0.283374  | 1.317781  | -0.133555 |
| N                                                                                 | 0.605837                                                                           | -0.076570                                                                           | 0.034623  | N | 0.603198  | -0.121274 | 0.008897  | N | 0.592024  | -0.048161 | 0.043564  |
| C                                                                                 | -0.588262                                                                          | -0.813736                                                                           | -0.019922 | C | -0.605400 | -0.834220 | -0.047608 | C | -0.590210 | -0.801898 | -0.017661 |
| O                                                                                 | -1.676051                                                                          | 2.459655                                                                            | -0.403798 | O | -1.633170 | 2.466461  | -0.355305 | O | -1.726169 | 2.456766  | -0.390336 |
| N                                                                                 | -0.585843                                                                          | -2.143332                                                                           | 0.039552  | N | -0.627018 | -2.164403 | -0.013735 | N | -0.569853 | -2.131953 | 0.035456  |
| C                                                                                 | 1.812995                                                                           | -0.574775                                                                           | -0.440346 | C | 1.793270  | -0.632760 | -0.493852 | C | 1.810788  | -0.530840 | -0.426287 |
| O                                                                                 | 2.109237                                                                           | -1.750073                                                                           | -0.284972 | O | 2.075338  | -1.813720 | -0.365576 | O | 2.119270  | -1.701522 | -0.257602 |
| C                                                                                 | 0.907997                                                                           | 2.127299                                                                            | 0.963196  | C | 0.957914  | 2.055597  | 0.978985  | C | 0.864606  | 2.159619  | 0.970796  |
| C                                                                                 | 0.118204                                                                           | 1.980281                                                                            | 2.258159  | C | 0.180577  | 1.893054  | 2.279564  | C | 0.076571  | 2.006809  | 2.266272  |
| C                                                                                 | -3.080898                                                                          | -1.417822                                                                           | 1.971658  | C | -3.094498 | -1.426932 | 1.954824  | C | -3.075523 | -1.455913 | 1.965392  |
| S                                                                                 | 2.828507                                                                           | 0.606045                                                                            | -1.276769 | S | 2.818807  | 0.546362  | -1.325839 | S | 2.809119  | 0.656638  | -1.270773 |
| C                                                                                 | 4.310432                                                                           | -0.415977                                                                           | -1.512392 | C | 4.272004  | -0.506132 | -1.600225 | C | 4.376989  | -0.342245 | -1.429845 |
| C                                                                                 | 5.205808                                                                           | -0.575695                                                                           | -0.316649 | C | 5.211502  | -0.663458 | -0.443655 | C | 5.199492  | -0.287909 | -0.205370 |
| C                                                                                 | 4.937497                                                                           | -0.238011                                                                           | 0.947780  | C | 4.992432  | -0.320422 | 0.843783  | C | 4.925477  | -1.167562 | 0.968841  |
| C                                                                                 | 1.066803                                                                           | 3.570945                                                                            | 0.514207  | C | 1.136901  | 3.506132  | 0.560999  | C | 1.008355  | 3.604030  | 0.519248  |
| H                                                                                 | -5.665930                                                                          | -1.753677                                                                           | 1.317126  | H | -5.690365 | -1.702625 | 1.313446  | H | -5.654243 | -1.826877 | 1.306576  |

|   |           |           |           |   |           |           |           |   |           |           |           |
|---|-----------|-----------|-----------|---|-----------|-----------|-----------|---|-----------|-----------|-----------|
| H | -6.879144 | -0.994939 | -0.699785 | H | -6.902792 | -0.886001 | -0.681179 | H | -6.877733 | -1.073552 | -0.706153 |
| H | -5.665008 | 0.271908  | -2.472809 | H | -5.677327 | 0.389874  | -2.439999 | H | -5.681769 | 0.222889  | -2.470172 |
| H | -3.241106 | 0.720477  | -2.211410 | H | -3.243823 | 0.789033  | -2.187657 | H | -3.265006 | 0.705811  | -2.204522 |
| H | -2.273896 | -0.736632 | 2.257976  | H | -2.274470 | -0.764676 | 2.248507  | H | -2.279700 | -0.763984 | 2.257223  |
| H | -2.643996 | -2.415698 | 1.852890  | H | -2.674824 | -2.429299 | 1.813752  | H | -2.622613 | -2.445886 | 1.840811  |
| H | -3.799597 | -1.471774 | 2.792834  | H | -3.808497 | -1.485124 | 2.779794  | H | -3.794394 | -1.526493 | 2.785164  |
| H | 0.281484  | -2.658676 | 0.109830  | H | 0.231074  | -2.697056 | 0.039700  | H | 0.304641  | -2.634841 | 0.106504  |
| H | -1.448099 | -2.637297 | -0.151215 | H | -1.500219 | -2.639368 | -0.202797 | H | -1.424223 | -2.636878 | -0.161703 |
| H | 1.906553  | 1.708598  | 1.112284  | H | 1.950702  | 1.616270  | 1.106930  | H | 1.867192  | 1.751223  | 1.119653  |
| H | 0.656246  | 2.481390  | 3.067326  | H | 0.737634  | 2.364248  | 3.093811  | H | 0.609979  | 2.513726  | 3.074916  |
| H | 0.000708  | 0.925695  | 2.529555  | H | 0.045389  | 0.834770  | 2.527239  | H | -0.030929 | 0.951383  | 2.538724  |
| H | -0.872815 | 2.436981  | 2.171780  | H | -0.802151 | 2.370924  | 2.215861  | H | -0.918814 | 2.453852  | 2.179772  |
| H | 0.101516  | 4.069731  | 0.409935  | H | 0.179645  | 4.024667  | 0.482597  | H | 0.037875  | 4.092122  | 0.412326  |
| H | 1.651014  | 4.106590  | 1.267833  | H | 1.741552  | 4.013298  | 1.318174  | H | 1.585512  | 4.147846  | 1.272499  |
| H | 1.600217  | 3.625819  | -0.439118 | H | 1.657641  | 3.573778  | -0.398498 | H | 1.542552  | 3.662352  | -0.433427 |
| H | 4.003103  | -1.392932 | -1.898531 | H | 3.935484  | -1.483968 | -1.959648 | H | 4.076764  | -1.352787 | -1.714913 |
| H | 4.854666  | 0.087060  | -2.317917 | H | 4.800173  | -0.030162 | -2.432841 | H | 4.874829  | 0.132088  | -2.277895 |
| H | 6.164903  | -1.033223 | -0.555877 | H | 6.156379  | -1.133377 | -0.710970 | H | 5.815330  | 0.591310  | -0.043855 |
| H | 5.671781  | -0.404358 | 1.729313  | H | 5.785999  | -0.416369 | 1.575599  | H | 5.781251  | -1.148181 | 1.648395  |
| H | 3.996669  | 0.222831  | 1.242163  | H | 4.085049  | 0.188467  | 1.159571  | H | 4.055917  | -0.792585 | 1.537510  |
| O | 4.439486  | -2.890090 | 0.954422  | O | 4.362365  | -2.403532 | 1.363309  | O | 4.707559  | -2.532396 | 0.616332  |
| H | 3.634877  | -2.564301 | 0.495336  | H | 3.593138  | -2.369413 | 0.761393  | H | 3.820535  | -2.592577 | 0.229459  |

**Table S3.** Standard enthalpy ( $\Delta H^\circ_{0K}$ ) for MCR and MCP, adiabatic energy barrier ( $E_0$ ) for TS, and standard reaction enthalpy ( $\Delta_r H^\circ_{0K}$ ) for products (P) at 0 K of the FHT reactions, in addition to their standard activation enthalpy ( $\Delta H^{\ddagger}_{298K}$ ) and standard reaction enthalpy ( $\Delta_r H^\circ_{298K}$ ) at 298 K. Units are in  $\text{kJ mol}^{-1}$ . All calculations are performed at the M06-2X/6-311++G(3df,3pd)//M06-2X/6-31+G(d,p) level of theory.

| Positions | MCR    | TS     | MCP     | P       | $\Delta H^{\ddagger}_{298K}$ | $\Delta_r H^\circ_{298K}$ |
|-----------|--------|--------|---------|---------|------------------------------|---------------------------|
| H9        | -17.99 | 15.00  | -43.81  | -36.58  | 11.93                        | -36.06                    |
| H10       | -26.54 | 17.14  | -39.29  | -35.82  | 14.51                        | -35.13                    |
| H11       | -26.53 | 16.64  | -38.63  | -34.61  | 14.18                        | -34.09                    |
| H12       | -24.97 | 13.50  | -46.26  | -36.24  | 10.69                        | -35.59                    |
| H13       | -19.67 | -10.87 | -145.27 | -125.17 | -15.15                       | -125.20                   |
| H14       | -17.98 | -0.12  | -136.73 | -125.65 | -3.73                        | -125.49                   |
| H15       | -19.65 | -10.86 | -144.79 | -125.67 | -15.15                       | -125.49                   |
| H22       | -21.39 | 12.72  | -103.97 | -94.46  | 8.56                         | -94.65                    |
| H23       | -3.61  | 50.18  | -98.77  | -92.50  | 46.23                        | -93.16                    |
| H27       | -12.54 | 6.54   | -109.70 | -109.29 | 2.99                         | -107.23                   |
| H28       | -14.71 | 10.06  | -87.11  | -79.85  | 6.15                         | -77.65                    |
| H29       | -12.02 | 3.96   | -92.53  | -79.85  | 0.11                         | -77.64                    |
| H30       | -19.66 | -1.50  | -99.19  | -82.72  | -6.38                        | -80.51                    |
| H31       | -22.20 | -1.99  | -102.02 | -85.34  | -6.35                        | -83.21                    |
| H32       | -14.71 | 8.39   | -94.00  | -83.46  | 5.01                         | -81.82                    |
| H33       | -20.19 | 7.96   | -97.65  | -83.50  | 2.77                         | -81.84                    |
| H40       | -19.80 | -0.78  | -153.40 | -141.58 | -4.56                        | -140.99                   |
| H41       | -14.51 | 8.23   | -147.88 | -141.59 | 5.07                         | -140.99                   |
| H42       | -19.81 | 12.34  | -64.25  | -59.80  | 9.29                         | -58.61                    |
| H43       | -14.11 | 17.87  | -45.81  | -40.08  | 14.97                        | -39.29                    |
| H44       | -19.82 | 14.83  | -59.17  | -44.85  | 11.83                        | -44.03                    |

**Table S4.** Standard enthalpy, entropy, and Gibbs free energy of activation, and the ones of reaction for all the FHT reactions at 298 K temperature calculated at the M06-2X/6-31+G(d,p) level of theory (level 1, L1), and at the M06-2X/6-311++G(3df,3pd) level of theory (level 2, L2) in the aqueous phase. Differences of standard Gibbs free energy of activation ( $\Delta\Delta G^{\ddagger}$ ) and reaction ( $\Delta\Delta_r G^\circ$ ) between the level 1 and level 2 are also shown.

|            | Level | $\Delta H^{\ddagger}_{298K}$ | $\Delta S^{\ddagger}_{298K}$ | $\Delta G^{\ddagger}_{298K}$ | $\Delta_r H^{\circ}_{298K}$ | $\Delta_r S^{\circ}_{298K}$ | $\Delta_r G^{\circ}_{298K}$ | $\Delta\Delta G^{\ddagger}$ | $\Delta\Delta_r G^\circ$ |
|------------|-------|------------------------------|------------------------------|------------------------------|-----------------------------|-----------------------------|-----------------------------|-----------------------------|--------------------------|
| <b>H9</b>  | L1    | 13.44                        | -129.34                      | 52.00                        | -31.67                      | 9.59                        | -34.53                      |                             |                          |
|            | L2    | 11.93                        | -129.34                      | 50.49                        | -36.06                      | 9.59                        | -38.92                      | -1.52                       | -4.39                    |
| <b>H10</b> | L1    | 15.79                        | -123.53                      | 52.62                        | -30.87                      | 11.57                       | -34.31                      |                             |                          |
|            | L2    | 14.51                        | -123.53                      | 51.34                        | -35.13                      | 11.57                       | -38.58                      | -1.27                       | -4.26                    |
| <b>H11</b> | L1    | 15.39                        | -120.12                      | 51.20                        | -29.81                      | 9.47                        | -32.64                      |                             |                          |
|            | L2    | 14.18                        | -120.12                      | 50.00                        | -34.09                      | 9.47                        | -36.92                      | -1.21                       | -4.28                    |
| <b>H12</b> | L1    | 11.66                        | -126.59                      | 49.40                        | -30.98                      | 11.67                       | -34.46                      |                             |                          |
|            | L2    | 10.69                        | -126.59                      | 48.43                        | -35.59                      | 11.67                       | -39.07                      | -0.97                       | -4.61                    |
| <b>H13</b> | L1    | -15.44                       | -136.86                      | 25.36                        | -119.93                     | 0.42                        | -120.05                     |                             |                          |
|            | L2    | -15.15                       | -136.86                      | 25.65                        | -125.20                     | 0.42                        | -125.33                     | 0.29                        | -5.27                    |
| <b>H14</b> | L1    | -3.56                        | -133.88                      | 36.36                        | -120.19                     | 4.59                        | -121.56                     |                             |                          |
|            | L2    | -3.73                        | -133.88                      | 36.19                        | -125.49                     | 4.59                        | -126.86                     | -0.16                       | -5.30                    |
| <b>H15</b> | L1    | -15.44                       | -137.15                      | 25.45                        | -120.19                     | 4.75                        | -121.61                     |                             |                          |
|            | L2    | -15.15                       | -137.15                      | 25.74                        | -125.49                     | 4.75                        | -126.91                     | 0.29                        | -5.30                    |
| <b>H22</b> | L1    | 11.27                        | -129.58                      | 49.90                        | -87.00                      | 15.57                       | -91.64                      |                             |                          |
|            | L2    | 8.56                         | -129.58                      | 47.19                        | -94.65                      | 15.57                       | -99.29                      | -2.71                       | -7.64                    |
| <b>H23</b> | L1    | 47.19                        | -126.81                      | 85.00                        | -91.57                      | 7.62                        | -93.84                      |                             |                          |
|            | L2    | 46.23                        | -126.81                      | 84.03                        | -93.16                      | 7.62                        | -95.43                      | -0.97                       | -1.60                    |
| <b>H27</b> | L1    | 2.51                         | -136.55                      | 43.22                        | -102.21                     | 32.23                       | -111.82                     |                             |                          |
|            | L2    | 2.99                         | -136.55                      | 43.70                        | -107.23                     | 32.23                       | -116.85                     | 0.48                        | -5.03                    |
| <b>H28</b> | L1    | 7.37                         | -131.68                      | 46.63                        | -73.67                      | 24.74                       | -81.04                      |                             |                          |
|            | L2    | 6.15                         | -131.68                      | 45.41                        | -77.65                      | 24.74                       | -85.02                      | -1.22                       | -3.98                    |
| <b>H29</b> | L1    | -0.48                        | -139.32                      | 41.06                        | -73.66                      | 24.77                       | -81.05                      |                             |                          |
|            | L2    | 0.11                         | -139.32                      | 41.64                        | -77.64                      | 24.77                       | -85.03                      | 0.59                        | -3.98                    |
| <b>H30</b> | L1    | -5.26                        | -150.47                      | 39.61                        | -76.34                      | 22.13                       | -82.94                      |                             |                          |
|            | L2    | -6.38                        | -150.47                      | 38.48                        | -80.51                      | 22.13                       | -87.11                      | -1.13                       | -4.17                    |
| <b>H31</b> | L1    | -5.65                        | -140.53                      | 36.25                        | -78.60                      | 25.69                       | -86.26                      |                             |                          |
|            | L2    | -6.35                        | -140.53                      | 35.55                        | -83.21                      | 25.69                       | -90.87                      | -0.71                       | -4.61                    |
| <b>H32</b> | L1    | 6.15                         | -124.43                      | 43.24                        | -77.14                      | 18.24                       | -82.58                      |                             |                          |
|            | L2    | 5.01                         | -124.43                      | 42.11                        | -81.82                      | 18.24                       | -87.25                      | -1.13                       | -4.67                    |
| <b>H33</b> | L1    | 3.23                         | -149.76                      | 47.88                        | -77.17                      | 18.48                       | -82.68                      |                             |                          |
|            | L2    | 2.77                         | -149.76                      | 47.42                        | -81.84                      | 18.48                       | -87.35                      | -0.46                       | -4.67                    |
| <b>H40</b> | L1    | -4.12                        | -133.91                      | 35.81                        | -136.57                     | 11.88                       | -140.11                     |                             |                          |

|            |    |       |         |       |         |       |         |       |       |
|------------|----|-------|---------|-------|---------|-------|---------|-------|-------|
|            | L2 | -4.56 | -133.91 | 35.37 | -140.99 | 11.88 | -144.53 | -0.44 | -4.42 |
| <b>H41</b> | L1 | 6.07  | -129.15 | 44.58 | -136.57 | 11.97 | -140.13 |       |       |
|            | L2 | 5.07  | -129.15 | 43.58 | -140.99 | 11.97 | -144.56 | -1.00 | -4.42 |
| <b>H42</b> | L1 | 10.56 | -125.62 | 48.02 | -54.32  | 17.23 | -59.46  |       |       |
|            | L2 | 9.29  | -125.62 | 46.74 | -58.61  | 17.23 | -63.74  | -1.27 | -4.28 |
| <b>H43</b> | L1 | 16.51 | -125.36 | 53.89 | -35.04  | 12.58 | -38.79  |       |       |
|            | L2 | 14.97 | -125.36 | 52.35 | -39.29  | 12.58 | -43.04  | -1.54 | -4.25 |
| <b>H44</b> | L1 | 11.60 | -133.72 | 51.47 | -40.12  | 12.01 | -43.70  |       |       |
|            | L2 | 11.83 | -133.72 | 51.70 | -44.03  | 12.01 | -47.61  | 0.23  | -3.92 |

**Table S5.** Standard enthalpy ( $\Delta H^\circ_{0K}$ ) for MCR and MCP, adiabatic energy barrier ( $E_0$ ) for TS, and standard reaction enthalpy ( $\Delta_r H^\circ_{0K}$ ) for products (P) at 0 K of the RAF reactions, in addition to their standard activation enthalpy ( $\Delta H^{\circ\ddagger}_{298K}$ ) and standard reaction enthalpy ( $\Delta_r H^\circ_{298K}$ ) at 298 K. Units are in  $\text{kJ mol}^{-1}$ . All calculations are performed at the M06-2X/6-311++G(3df,3pd)//M06-2X/6-31+G(d,p) level of theory.

| Positions | MCR    | TS     | P       | $\Delta H^{\circ\ddagger}_{298K}$ | $\Delta_r H^\circ_{298K}$ |
|-----------|--------|--------|---------|-----------------------------------|---------------------------|
| C1        | -17.93 | -1.21  | -66.36  | -5.89                             | -70.74                    |
| C2        | -20.13 | -10.24 | -85.26  | -14.94                            | -91.04                    |
| C3        | -20.13 | -3.17  | -74.29  | -6.66                             | -78.53                    |
| C4        | -20.12 | 0.66   | -73.41  | -3.09                             | -78.16                    |
| C5        | -26.54 | 0.35   | -68.88  | -2.67                             | -72.90                    |
| C6        | -26.55 | -2.81  | -76.66  | -7.99                             | -82.62                    |
| C7        | -22.43 | -18.31 | -48.91  | -23.41                            | -54.29                    |
| C16       | -24.96 | -7.87  | -89.99  | -13.49                            | -95.38                    |
| C19       | -25.02 | 6.05   | -32.21  | 0.02                              | -38.38                    |
| C34       | -22.83 | 32.79  | -43.11  | 27.61                             | -48.45                    |
| C38       | -14.11 | -9.83  | -128.50 | -13.56                            | -132.79                   |
| C39       | -19.81 | -14.64 | -135.40 | -18.93                            | -140.60                   |

**Table S6:** Standard enthalpy, entropy, and Gibbs free energy of activation, and the ones of reaction for all the RAF reactions at 298 K temperature calculated at the M06-2X/6-31+G(d,p) level of theory (level 1, L1), and at the M06-2X/6-311++G(3df,3pd) level of theory (level 2, L2) in the aqueous phase. Differences of standard Gibbs free energy of activation ( $\Delta\Delta G^{\ddagger}$ ) and reaction ( $\Delta\Delta_r G^\circ$ ) between the level 1 and level 2 are also shown.

|            | Level | $\Delta H^{\ddagger}_{298K}$ | $\Delta S^{\ddagger}_{298K}$ | $\Delta G^{\ddagger}_{298K}$ | $\Delta_r H^\circ_{298K}$ | $\Delta_r S^\circ_{298K}$ | $\Delta_r G^\circ_{298K}$ | $\Delta\Delta G^{\ddagger}$ | $\Delta\Delta_r G^\circ$ |
|------------|-------|------------------------------|------------------------------|------------------------------|---------------------------|---------------------------|---------------------------|-----------------------------|--------------------------|
| <b>C1</b>  | L1    | -7.12                        | -149.41                      | 37.43                        | -71.46                    | -139.17                   | -29.97                    |                             |                          |
|            | L2    | -5.89                        | -149.41                      | 38.65                        | -70.74                    | -139.17                   | -29.24                    | 1.23                        | 0.72                     |
| <b>C2</b>  | L1    | -15.41                       | -150.79                      | 29.55                        | -91.27                    | -156.81                   | -44.51                    |                             |                          |
|            | L2    | -14.94                       | -150.79                      | 30.02                        | -91.04                    | -156.81                   | -44.29                    | 0.47                        | 0.22                     |
| <b>C3</b>  | L1    | -5.80                        | -135.64                      | 34.64                        | -75.80                    | -140.29                   | -33.98                    |                             |                          |
|            | L2    | -6.66                        | -135.64                      | 33.79                        | -78.53                    | -140.29                   | -36.71                    | -0.86                       | -2.73                    |
| <b>C4</b>  | L1    | -2.39                        | -136.66                      | 38.35                        | -75.60                    | -145.51                   | -32.21                    |                             |                          |
|            | L2    | -3.09                        | -136.66                      | 37.65                        | -78.16                    | -145.51                   | -34.78                    | -0.70                       | -2.56                    |
| <b>C5</b>  | L1    | -2.22                        | -126.10                      | 35.38                        | -70.86                    | -138.08                   | -29.70                    |                             |                          |
|            | L2    | -2.67                        | -126.10                      | 34.93                        | -72.90                    | -138.08                   | -31.73                    | -0.45                       | -2.03                    |
| <b>C6</b>  | L1    | -6.31                        | -134.72                      | 33.86                        | -77.44                    | -142.81                   | -34.86                    |                             |                          |
|            | L2    | -6.86                        | -134.72                      | 33.31                        | -79.59                    | -142.81                   | -37.01                    | -0.55                       | -2.15                    |
| <b>C7</b>  | L1    | -25.73                       | -152.42                      | 19.71                        | -59.52                    | -147.46                   | -15.56                    |                             |                          |
|            | L2    | -23.39                       | -152.42                      | 22.06                        | -55.86                    | -147.46                   | -11.90                    | 2.34                        | 3.66                     |
| <b>C16</b> | L1    | -14.46                       | -159.39                      | 33.07                        | -100.32                   | -151.82                   | -55.06                    |                             |                          |
|            | L2    | -13.49                       | -159.39                      | 34.03                        | -95.38                    | -151.82                   | -50.11                    | 0.96                        | 4.94                     |
| <b>C19</b> | L1    | -1.23                        | -164.01                      | 47.67                        | -45.47                    | -164.10                   | 3.45                      |                             |                          |
|            | L2    | 0.02                         | -164.01                      | 48.92                        | -38.38                    | -164.10                   | 10.55                     | 1.25                        | 7.09                     |
| <b>C34</b> | L1    | 24.50                        | -154.31                      | 70.50                        | -58.43                    | -152.81                   | -12.87                    |                             |                          |
|            | L2    | 27.61                        | -154.31                      | 73.62                        | -48.45                    | -152.81                   | -2.89                     | 3.12                        | 9.99                     |
| <b>C38</b> | L1    | -14.20                       | -130.52                      | 24.71                        | -134.58                   | -141.43                   | -92.41                    |                             |                          |
|            | L2    | -13.56                       | -130.52                      | 25.35                        | -132.79                   | -141.43                   | -90.63                    | 0.64                        | 1.79                     |
| <b>C39</b> | L1    | -20.11                       | -134.93                      | 20.12                        | -141.86                   | -143.94                   | -98.94                    |                             |                          |
|            | L2    | -18.93                       | -134.93                      | 21.30                        | -140.60                   | -143.94                   | -97.69                    | 1.18                        | 1.26                     |



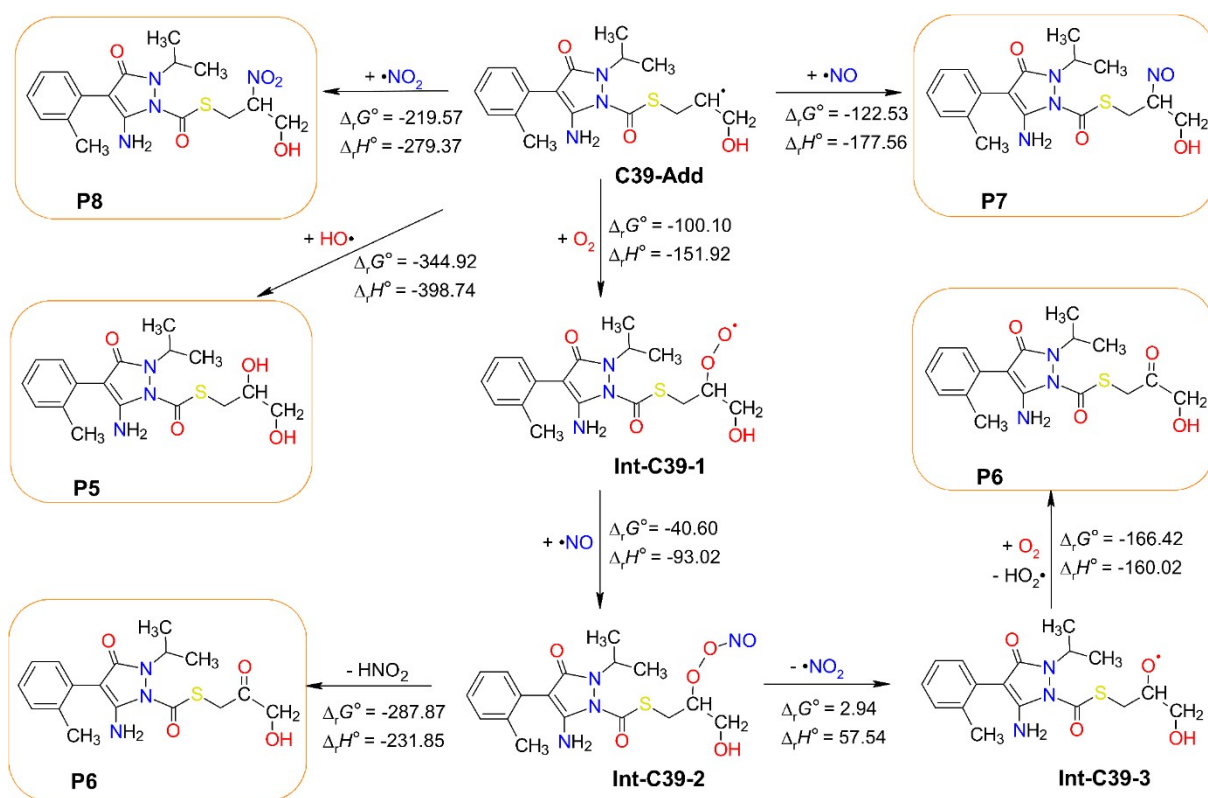

**Figure S5.** Standard Gibbs free reaction energy ( $\Delta_r G^\circ$ ) and standard reaction enthalpy ( $\Delta_r H^\circ$ ) calculated for the further reactions of C39-Add with  $^3\text{O}_2$ ,  $\text{HO}\cdot$ ,  $\cdot\text{NO}$ , and  $\cdot\text{NO}_2$  at 298 K. Units are in  $\text{kJ mol}^{-1}$ . All calculations are performed at the M06-2X/6-311++G(3df,3pd)//M06-2X/6-31+G(d,p) level of theory.

**Table S7.** Apparent rate constants ( $k$ , in  $M^{-1} s^{-1}$ ) of all oxidation reactions, with the total FHT, RAF, SET, and the overall rate constants in the temperature range of 283-323 K. (The most favourable pathways are in bold).

| T (K) | H9-Abs               | H10-Abs              | H11-Abs              | H12-Abs              | H13-Abs                    | H14-Abs              | H15-Abs                    | H22-Abs              | H23-Abs              | H27-Abs              | H28-Abs              | H29-Abs              |
|-------|----------------------|----------------------|----------------------|----------------------|----------------------------|----------------------|----------------------------|----------------------|----------------------|----------------------|----------------------|----------------------|
| 283   | 1.00×10 <sup>6</sup> | 8.54×10 <sup>5</sup> | 1.50×10 <sup>6</sup> | 4.03×10 <sup>6</sup> | <b>1.45×10<sup>9</sup></b> | 2.79×10 <sup>8</sup> | <b>1.70×10<sup>9</sup></b> | 1.23×10 <sup>8</sup> | 1.40                 | 1.66×10 <sup>7</sup> | 8.26×10 <sup>6</sup> | 4.14×10 <sup>7</sup> |
| 288   | 1.08×10 <sup>6</sup> | 9.29×10 <sup>5</sup> | 1.63×10 <sup>6</sup> | 4.21×10 <sup>6</sup> | <b>1.66×10<sup>9</sup></b> | 2.79×10 <sup>8</sup> | <b>1.95×10<sup>9</sup></b> | 1.18×10 <sup>8</sup> | 1.86                 | 1.70×10 <sup>7</sup> | 8.59×10 <sup>6</sup> | 4.14×10 <sup>7</sup> |
| 293   | 1.17×10 <sup>6</sup> | 1.01×10 <sup>6</sup> | 1.77×10 <sup>6</sup> | 4.40×10 <sup>6</sup> | <b>1.88×10<sup>9</sup></b> | 2.79×10 <sup>8</sup> | <b>2.20×10<sup>9</sup></b> | 1.13×10 <sup>8</sup> | 2.47                 | 1.73×10 <sup>7</sup> | 8.93×10 <sup>6</sup> | 4.15×10 <sup>7</sup> |
| 298   | 1.26×10 <sup>6</sup> | 1.10×10 <sup>6</sup> | 1.92×10 <sup>6</sup> | 4.61×10 <sup>6</sup> | <b>2.11×10<sup>9</sup></b> | 2.78×10 <sup>8</sup> | <b>2.45×10<sup>9</sup></b> | 1.08×10 <sup>8</sup> | 3.24                 | 1.77×10 <sup>7</sup> | 9.29×10 <sup>6</sup> | 4.16×10 <sup>7</sup> |
| 303   | 1.36×10 <sup>6</sup> | 1.19×10 <sup>6</sup> | 2.07×10 <sup>6</sup> | 4.83×10 <sup>6</sup> | <b>2.34×10<sup>9</sup></b> | 2.77×10 <sup>8</sup> | <b>2.70×10<sup>9</sup></b> | 1.03×10 <sup>8</sup> | 4.24                 | 1.81×10 <sup>7</sup> | 9.67×10 <sup>6</sup> | 4.17×10 <sup>7</sup> |
| 308   | 1.46×10 <sup>6</sup> | 1.29×10 <sup>6</sup> | 2.25×10 <sup>6</sup> | 5.06×10 <sup>6</sup> | <b>2.56×10<sup>9</sup></b> | 2.75×10 <sup>8</sup> | <b>2.94×10<sup>9</sup></b> | 9.88×10 <sup>7</sup> | 5.52                 | 1.84×10 <sup>7</sup> | 1.01×10 <sup>7</sup> | 4.18×10 <sup>7</sup> |
| 313   | 1.57×10 <sup>6</sup> | 1.40×10 <sup>6</sup> | 2.43×10 <sup>6</sup> | 5.31×10 <sup>6</sup> | <b>2.78×10<sup>9</sup></b> | 2.74×10 <sup>8</sup> | <b>3.18×10<sup>9</sup></b> | 9.49×10 <sup>7</sup> | 7.14                 | 1.89×10 <sup>7</sup> | 1.05×10 <sup>7</sup> | 4.20×10 <sup>7</sup> |
| 318   | 1.69×10 <sup>6</sup> | 1.52×10 <sup>6</sup> | 2.62×10 <sup>6</sup> | 5.57×10 <sup>6</sup> | <b>2.99×10<sup>9</sup></b> | 2.72×10 <sup>8</sup> | <b>3.39×10<sup>9</sup></b> | 9.14×10 <sup>7</sup> | 9.18                 | 1.93×10 <sup>7</sup> | 1.09×10 <sup>7</sup> | 4.22×10 <sup>7</sup> |
| 323   | 1.81×10 <sup>6</sup> | 1.64×10 <sup>6</sup> | 2.83×10 <sup>6</sup> | 5.85×10 <sup>6</sup> | <b>3.18×10<sup>9</sup></b> | 2.70×10 <sup>8</sup> | <b>3.59×10<sup>9</sup></b> | 8.83×10 <sup>7</sup> | 1.17×10 <sup>1</sup> | 1.97×10 <sup>7</sup> | 1.13×10 <sup>7</sup> | 4.25×10 <sup>7</sup> |

  

| T (K) | H30-Abs              | H31-Abs                    | H32-Abs              | H33-Abs              | H40-Abs                    | H41-Abs              | H42-Abs              | H43-Abs              | H44-Abs              | C1-Add               | C2-Add               | C3-Add               |
|-------|----------------------|----------------------------|----------------------|----------------------|----------------------------|----------------------|----------------------|----------------------|----------------------|----------------------|----------------------|----------------------|
| 283   | 1.62×10 <sup>8</sup> | <b>4.17×10<sup>8</sup></b> | 2.67×10 <sup>7</sup> | 5.77×10 <sup>6</sup> | <b>4.55×10<sup>8</sup></b> | 2.38×10 <sup>7</sup> | 4.28×10 <sup>6</sup> | 6.70×10 <sup>5</sup> | 1.47×10 <sup>6</sup> | 5.38×10 <sup>7</sup> | 8.70×10 <sup>8</sup> | 3.32×10 <sup>8</sup> |
| 288   | 1.56×10 <sup>8</sup> | <b>4.14×10<sup>8</sup></b> | 2.77×10 <sup>7</sup> | 5.76×10 <sup>6</sup> | <b>4.58×10<sup>8</sup></b> | 2.43×10 <sup>7</sup> | 4.55×10 <sup>6</sup> | 7.28×10 <sup>5</sup> | 1.53×10 <sup>6</sup> | 5.36×10 <sup>7</sup> | 9.10×10 <sup>8</sup> | 3.38×10 <sup>8</sup> |
| 293   | 1.51×10 <sup>8</sup> | <b>4.09×10<sup>8</sup></b> | 2.88×10 <sup>7</sup> | 5.76×10 <sup>6</sup> | <b>4.58×10<sup>8</sup></b> | 2.48×10 <sup>7</sup> | 4.85×10 <sup>6</sup> | 7.90×10 <sup>5</sup> | 1.59×10 <sup>6</sup> | 5.34×10 <sup>7</sup> | 9.37×10 <sup>8</sup> | 3.43×10 <sup>8</sup> |
| 298   | 1.45×10 <sup>8</sup> | <b>4.03×10<sup>8</sup></b> | 3.00×10 <sup>7</sup> | 5.77×10 <sup>6</sup> | <b>4.55×10<sup>8</sup></b> | 2.54×10 <sup>7</sup> | 5.15×10 <sup>6</sup> | 8.57×10 <sup>5</sup> | 1.66×10 <sup>6</sup> | 5.32×10 <sup>7</sup> | 9.53×10 <sup>8</sup> | 3.46×10 <sup>8</sup> |
| 303   | 1.40×10 <sup>8</sup> | <b>3.96×10<sup>8</sup></b> | 3.11×10 <sup>7</sup> | 5.78×10 <sup>6</sup> | <b>4.52×10<sup>8</sup></b> | 2.60×10 <sup>7</sup> | 5.48×10 <sup>6</sup> | 9.29×10 <sup>5</sup> | 1.73×10 <sup>6</sup> | 5.29×10 <sup>7</sup> | 9.58×10 <sup>8</sup> | 3.48×10 <sup>8</sup> |
| 308   | 1.36×10 <sup>8</sup> | <b>3.88×10<sup>8</sup></b> | 3.23×10 <sup>7</sup> | 5.81×10 <sup>6</sup> | <b>4.48×10<sup>8</sup></b> | 2.66×10 <sup>7</sup> | 5.82×10 <sup>6</sup> | 1.01×10 <sup>6</sup> | 1.81×10 <sup>6</sup> | 5.27×10 <sup>7</sup> | 9.54×10 <sup>8</sup> | 3.49×10 <sup>8</sup> |
| 313   | 1.31×10 <sup>8</sup> | <b>3.79×10<sup>8</sup></b> | 3.35×10 <sup>7</sup> | 5.84×10 <sup>6</sup> | <b>4.43×10<sup>8</sup></b> | 2.73×10 <sup>7</sup> | 6.18×10 <sup>6</sup> | 1.09×10 <sup>6</sup> | 1.89×10 <sup>6</sup> | 5.25×10 <sup>7</sup> | 9.43×10 <sup>8</sup> | 3.50×10 <sup>8</sup> |
| 318   | 1.27×10 <sup>8</sup> | <b>3.71×10<sup>8</sup></b> | 3.48×10 <sup>7</sup> | 5.88×10 <sup>6</sup> | <b>4.38×10<sup>8</sup></b> | 2.80×10 <sup>7</sup> | 6.55×10 <sup>6</sup> | 1.18×10 <sup>6</sup> | 1.98×10 <sup>6</sup> | 5.23×10 <sup>7</sup> | 9.27×10 <sup>8</sup> | 3.51×10 <sup>8</sup> |
| 323   | 1.23×10 <sup>8</sup> | <b>3.63×10<sup>8</sup></b> | 3.61×10 <sup>7</sup> | 5.93×10 <sup>6</sup> | <b>4.32×10<sup>8</sup></b> | 2.87×10 <sup>7</sup> | 6.94×10 <sup>6</sup> | 1.27×10 <sup>6</sup> | 2.08×10 <sup>6</sup> | 5.21×10 <sup>7</sup> | 9.07×10 <sup>8</sup> | 3.51×10 <sup>8</sup> |

  

| T (K) | C4-Add               | C5-Add               | C6-Add               | C7-Add                     | C16-Add              | C19-Add              | C34-Add              | C38-Add                    | C39-Add                    | FHT                  | RAF                   | SET                  | Overall               |
|-------|----------------------|----------------------|----------------------|----------------------------|----------------------|----------------------|----------------------|----------------------------|----------------------------|----------------------|-----------------------|----------------------|-----------------------|
| 283   | 8.04×10 <sup>7</sup> | 2.14×10 <sup>8</sup> | 1.26×10 <sup>8</sup> | <b>1.29×10<sup>9</sup></b> | 2.60×10 <sup>8</sup> | 8.62×10 <sup>5</sup> | 2.19×10 <sup>1</sup> | <b>1.39×10<sup>9</sup></b> | <b>1.51×10<sup>9</sup></b> | 4.73×10 <sup>9</sup> | 6.12×10 <sup>9</sup>  | 1.27×10 <sup>9</sup> | 1.21×10 <sup>10</sup> |
| 288   | 8.16×10 <sup>7</sup> | 2.21×10 <sup>8</sup> | 1.24×10 <sup>8</sup> | <b>1.49×10<sup>9</sup></b> | 2.55×10 <sup>8</sup> | 8.89×10 <sup>5</sup> | 2.77×10 <sup>1</sup> | <b>1.58×10<sup>9</sup></b> | <b>1.75×10<sup>9</sup></b> | 5.17×10 <sup>9</sup> | 6.80×10 <sup>9</sup>  | 1.55×10 <sup>9</sup> | 1.35×10 <sup>10</sup> |
| 293   | 8.28×10 <sup>7</sup> | 2.27×10 <sup>8</sup> | 1.22×10 <sup>8</sup> | <b>1.71×10<sup>9</sup></b> | 2.49×10 <sup>8</sup> | 9.16×10 <sup>5</sup> | 3.48×10 <sup>1</sup> | <b>1.77×10<sup>9</sup></b> | <b>2.00×10<sup>9</sup></b> | 5.63×10 <sup>9</sup> | 7.50×10 <sup>9</sup>  | 1.93×10 <sup>9</sup> | 1.51×10 <sup>10</sup> |
| 298   | 8.40×10 <sup>7</sup> | 2.33×10 <sup>8</sup> | 1.20×10 <sup>8</sup> | <b>1.94×10<sup>9</sup></b> | 2.43×10 <sup>8</sup> | 9.44×10 <sup>5</sup> | 4.34×10 <sup>1</sup> | <b>1.97×10<sup>9</sup></b> | <b>2.28×10<sup>9</sup></b> | 6.09×10 <sup>9</sup> | 8.21×10 <sup>9</sup>  | 2.35×10 <sup>9</sup> | 1.67×10 <sup>10</sup> |
| 303   | 8.51×10 <sup>7</sup> | 2.38×10 <sup>8</sup> | 1.18×10 <sup>8</sup> | <b>2.17×10<sup>9</sup></b> | 2.36×10 <sup>8</sup> | 9.71×10 <sup>5</sup> | 5.37×10 <sup>1</sup> | <b>2.16×10<sup>9</sup></b> | <b>2.56×10<sup>9</sup></b> | 6.55×10 <sup>9</sup> | 8.93×10 <sup>9</sup>  | 2.85×10 <sup>9</sup> | 1.83×10 <sup>10</sup> |
| 308   | 8.62×10 <sup>7</sup> | 2.44×10 <sup>8</sup> | 1.15×10 <sup>8</sup> | <b>2.42×10<sup>9</sup></b> | 2.29×10 <sup>8</sup> | 1.00×10 <sup>6</sup> | 6.60×10 <sup>1</sup> | <b>2.35×10<sup>9</sup></b> | <b>2.86×10<sup>9</sup></b> | 7.00×10 <sup>9</sup> | 9.66×10 <sup>9</sup>  | 3.44×10 <sup>9</sup> | 2.01×10 <sup>10</sup> |
| 313   | 8.72×10 <sup>7</sup> | 2.49×10 <sup>8</sup> | 1.13×10 <sup>8</sup> | <b>2.66×10<sup>9</sup></b> | 2.22×10 <sup>8</sup> | 1.03×10 <sup>6</sup> | 8.07×10 <sup>1</sup> | <b>2.53×10<sup>9</sup></b> | <b>3.17×10<sup>9</sup></b> | 7.44×10 <sup>9</sup> | 1.04×10 <sup>10</sup> | 4.09×10 <sup>9</sup> | 2.19×10 <sup>10</sup> |
| 318   | 8.83×10 <sup>7</sup> | 2.54×10 <sup>8</sup> | 1.11×10 <sup>8</sup> | <b>2.91×10<sup>9</sup></b> | 2.15×10 <sup>8</sup> | 1.06×10 <sup>6</sup> | 9.81×10 <sup>1</sup> | <b>2.70×10<sup>9</sup></b> | <b>3.48×10<sup>9</sup></b> | 7.84×10 <sup>9</sup> | 1.11×10 <sup>10</sup> | 4.83×10 <sup>9</sup> | 2.38×10 <sup>10</sup> |
| 323   | 8.94×10 <sup>7</sup> | 2.59×10 <sup>8</sup> | 1.09×10 <sup>8</sup> | <b>3.15×10<sup>9</sup></b> | 2.08×10 <sup>8</sup> | 1.09×10 <sup>6</sup> | 1.19×10 <sup>2</sup> | <b>2.85×10<sup>9</sup></b> | <b>3.80×10<sup>9</sup></b> | 8.22×10 <sup>9</sup> | 1.18×10 <sup>10</sup> | 5.63×10 <sup>9</sup> | 2.56×10 <sup>10</sup> |

**Table S8.** Branching ratio ( $\Gamma$ , %) of all oxidation reactions, with the total FHT, RAF, SET, and the overall branching ratio at the temperature range of 283-323 K. (The most favourable pathways are in bold).

| T (K) | H9-Abs | H10-Abs | H11-Abs | H12-Abs | H13-Abs      | H14-Abs | H15-Abs      | H22-Abs | H23-Abs | H27-Abs | H28-Abs | H29-Abs |
|-------|--------|---------|---------|---------|--------------|---------|--------------|---------|---------|---------|---------|---------|
| 283   | 0.01   | 0.01    | 0.01    | 0.03    | <b>11.96</b> | 2.30    | <b>14.06</b> | 1.02    | 0.00    | 0.14    | 0.07    | 0.34    |
| 288   | 0.01   | 0.01    | 0.01    | 0.03    | <b>12.28</b> | 2.07    | <b>14.39</b> | 0.87    | 0.00    | 0.13    | 0.06    | 0.31    |
| 293   | 0.01   | 0.01    | 0.01    | 0.03    | <b>12.50</b> | 1.85    | <b>14.59</b> | 0.75    | 0.00    | 0.12    | 0.06    | 0.28    |
| 298   | 0.01   | 0.01    | 0.01    | 0.03    | <b>12.66</b> | 1.67    | <b>14.70</b> | 0.65    | 0.00    | 0.11    | 0.06    | 0.25    |
| 303   | 0.01   | 0.01    | 0.01    | 0.03    | <b>12.74</b> | 1.51    | <b>14.73</b> | 0.56    | 0.00    | 0.10    | 0.05    | 0.23    |
| 308   | 0.01   | 0.01    | 0.01    | 0.03    | <b>12.74</b> | 1.37    | <b>14.65</b> | 0.49    | 0.00    | 0.09    | 0.05    | 0.21    |
| 313   | 0.01   | 0.01    | 0.01    | 0.02    | <b>12.69</b> | 1.25    | <b>14.50</b> | 0.43    | 0.00    | 0.09    | 0.05    | 0.19    |
| 318   | 0.01   | 0.01    | 0.01    | 0.02    | <b>12.58</b> | 1.14    | <b>14.28</b> | 0.38    | 0.00    | 0.08    | 0.05    | 0.18    |
| 323   | 0.01   | 0.01    | 0.01    | 0.02    | <b>12.43</b> | 1.06    | <b>14.01</b> | 0.34    | 0.00    | 0.08    | 0.04    | 0.17    |

  

| T (K) | H30-Abs | H31-Abs     | H32-Abs | H33-Abs | H40-Abs     | H41-Abs | H42-Abs | H43-Abs | H44-Abs | C1-Add | C2-Add | C3-Add |
|-------|---------|-------------|---------|---------|-------------|---------|---------|---------|---------|--------|--------|--------|
| 283   | 1.34    | <b>3.44</b> | 0.22    | 0.05    | <b>3.76</b> | 0.20    | 0.04    | 0.01    | 0.01    | 0.44   | 7.18   | 2.74   |
| 288   | 1.15    | <b>3.06</b> | 0.21    | 0.04    | <b>3.38</b> | 0.18    | 0.03    | 0.01    | 0.01    | 0.40   | 6.73   | 2.50   |
| 293   | 1.00    | <b>2.72</b> | 0.19    | 0.04    | <b>3.04</b> | 0.16    | 0.03    | 0.01    | 0.01    | 0.35   | 6.22   | 2.27   |
| 298   | 0.87    | <b>2.42</b> | 0.18    | 0.03    | <b>2.73</b> | 0.15    | 0.03    | 0.01    | 0.01    | 0.32   | 5.72   | 2.08   |
| 303   | 0.77    | <b>2.16</b> | 0.17    | 0.03    | <b>2.47</b> | 0.14    | 0.03    | 0.01    | 0.01    | 0.29   | 5.22   | 1.90   |
| 308   | 0.67    | <b>1.93</b> | 0.16    | 0.03    | <b>2.23</b> | 0.13    | 0.03    | 0.01    | 0.01    | 0.26   | 4.75   | 1.74   |
| 313   | 0.60    | <b>1.73</b> | 0.15    | 0.03    | <b>2.02</b> | 0.12    | 0.03    | 0.00    | 0.01    | 0.24   | 4.31   | 1.60   |
| 318   | 0.54    | <b>1.56</b> | 0.15    | 0.02    | <b>1.84</b> | 0.12    | 0.03    | 0.00    | 0.01    | 0.22   | 3.90   | 1.48   |
| 323   | 0.48    | <b>1.42</b> | 0.14    | 0.02    | <b>1.69</b> | 0.11    | 0.03    | 0.00    | 0.01    | 0.20   | 3.54   | 1.37   |

  

| T (K) | C4-Add | C5-Add | C6-Add | C7-Add       | C16-Add | C19-Add | C34-Add | C38-Add      | C39-Add      | FHT   | RAF   | SET   | Overall |
|-------|--------|--------|--------|--------------|---------|---------|---------|--------------|--------------|-------|-------|-------|---------|
| 283   | 0.66   | 1.77   | 1.04   | <b>10.65</b> | 2.15    | 0.01    | 0.00    | <b>11.47</b> | <b>12.45</b> | 39.00 | 50.55 | 10.45 | 100.00  |
| 288   | 0.60   | 1.63   | 0.92   | <b>11.03</b> | 1.89    | 0.01    | 0.00    | <b>11.68</b> | <b>12.91</b> | 38.24 | 50.29 | 11.47 | 100.00  |
| 293   | 0.55   | 1.51   | 0.81   | <b>11.35</b> | 1.66    | 0.01    | 0.00    | <b>11.78</b> | <b>13.30</b> | 37.39 | 49.81 | 12.80 | 100.00  |
| 298   | 0.50   | 1.40   | 0.72   | <b>11.62</b> | 1.46    | 0.01    | 0.00    | <b>11.82</b> | <b>13.66</b> | 36.58 | 49.29 | 14.13 | 100.00  |
| 303   | 0.46   | 1.30   | 0.64   | <b>11.85</b> | 1.29    | 0.01    | 0.00    | <b>11.79</b> | <b>13.97</b> | 35.74 | 48.71 | 15.54 | 100.00  |
| 308   | 0.43   | 1.21   | 0.57   | <b>12.02</b> | 1.14    | 0.00    | 0.00    | <b>11.68</b> | <b>14.23</b> | 34.85 | 48.04 | 17.12 | 100.00  |
| 313   | 0.40   | 1.14   | 0.52   | <b>12.15</b> | 1.01    | 0.00    | 0.00    | <b>11.54</b> | <b>14.46</b> | 33.95 | 47.36 | 18.69 | 100.00  |
| 318   | 0.37   | 1.07   | 0.47   | <b>12.24</b> | 0.90    | 0.00    | 0.00    | <b>11.35</b> | <b>14.65</b> | 33.01 | 46.65 | 20.34 | 100.00  |
| 323   | 0.35   | 1.01   | 0.43   | <b>12.29</b> | 0.81    | 0.00    | 0.00    | <b>11.14</b> | <b>14.82</b> | 32.07 | 45.95 | 21.98 | 100.00  |

**Table S9.** Tunnelling correction estimated by the Eckart method for formal hydrogen transfer (FHT) at the temperature  $T$  from 283 to 333 K.

| T (K) | H9-Abs | H10-Abs | H11-Abs | H12-Abs | H13-Abs | H14-Abs | H15-Abs | H22-Abs | H23-Abs | H27-Abs |  |
|-------|--------|---------|---------|---------|---------|---------|---------|---------|---------|---------|--|
| 283   | 3.27   | 4.17    | 4.23    | 5.60    | 2.19    | 2.40    | 2.19    | 114.45  | 7.22    | 2.92    |  |
| 288   | 3.13   | 3.93    | 3.99    | 5.22    | 2.14    | 2.32    | 2.14    | 96.51   | 6.60    | 2.81    |  |
| 293   | 2.99   | 3.72    | 3.78    | 4.88    | 2.09    | 2.25    | 2.09    | 82.06   | 6.07    | 2.71    |  |
| 298   | 2.88   | 3.54    | 3.59    | 4.59    | 2.04    | 2.19    | 2.04    | 70.32   | 5.61    | 2.62    |  |
| 303   | 2.77   | 3.38    | 3.42    | 4.33    | 2.00    | 2.13    | 2.00    | 60.72   | 5.22    | 2.53    |  |
| 308   | 2.67   | 3.23    | 3.27    | 4.10    | 1.95    | 2.08    | 1.95    | 52.79   | 4.88    | 2.46    |  |
| 313   | 2.58   | 3.09    | 3.13    | 3.90    | 1.92    | 2.03    | 1.92    | 46.21   | 4.58    | 2.39    |  |
| 318   | 2.50   | 2.97    | 3.01    | 3.71    | 1.88    | 1.99    | 1.88    | 40.69   | 4.32    | 2.32    |  |
| 323   | 2.43   | 2.86    | 2.90    | 3.55    | 1.84    | 1.94    | 1.84    | 36.05   | 4.09    | 2.26    |  |
| 328   | 2.36   | 2.76    | 2.79    | 3.40    | 1.81    | 1.90    | 1.81    | 32.12   | 3.88    | 2.20    |  |
| 333   | 2.29   | 2.67    | 2.70    | 3.26    | 1.78    | 1.87    | 1.78    | 28.76   | 3.69    | 2.15    |  |

| T (K) | H28-Abs | H29-Abs | H30-Abs | H31-Abs | H32-Abs | H33-Abs | H40-Abs | H41-Abs | H42-Abs | H43-Abs | H44-Abs |
|-------|---------|---------|---------|---------|---------|---------|---------|---------|---------|---------|---------|
| 283   | 3.05    | 3.03    | 3.07    | 2.89    | 2.60    | 4.51    | 3.12    | 4.18    | 2.92    | 4.95    | 7.84    |
| 288   | 2.92    | 2.91    | 2.95    | 2.78    | 2.51    | 4.25    | 3.00    | 3.97    | 2.80    | 4.65    | 7.21    |
| 293   | 2.81    | 2.81    | 2.84    | 2.68    | 2.43    | 4.02    | 2.88    | 3.77    | 2.70    | 4.38    | 6.66    |
| 298   | 2.71    | 2.71    | 2.74    | 2.59    | 2.35    | 3.82    | 2.78    | 3.60    | 2.60    | 4.14    | 6.19    |
| 303   | 2.61    | 2.62    | 2.65    | 2.50    | 2.28    | 3.64    | 2.68    | 3.44    | 2.51    | 3.93    | 5.77    |
| 308   | 2.53    | 2.54    | 2.57    | 2.43    | 2.22    | 3.47    | 2.59    | 3.29    | 2.43    | 3.74    | 5.41    |
| 313   | 2.45    | 2.47    | 2.49    | 2.36    | 2.16    | 3.33    | 2.51    | 3.16    | 2.36    | 3.57    | 5.08    |
| 318   | 2.38    | 2.40    | 2.42    | 2.29    | 2.11    | 3.19    | 2.44    | 3.05    | 2.29    | 3.42    | 4.80    |
| 323   | 2.31    | 2.34    | 2.35    | 2.23    | 2.06    | 3.07    | 2.37    | 2.94    | 2.23    | 3.28    | 4.54    |
| 328   | 2.25    | 2.28    | 2.29    | 2.18    | 2.01    | 2.96    | 2.31    | 2.84    | 2.17    | 3.15    | 4.31    |
| 333   | 2.20    | 2.22    | 2.24    | 2.13    | 1.97    | 2.86    | 2.25    | 2.75    | 2.12    | 3.04    | 4.10    |

**Table S10.** Tunnelling correction estimated by the Eckart method for Radical adduct formation (RAF) at the temperature  $T$  from 283 to 333 K.

| <b>T (K)</b> | <b>C1-Add</b> | <b>C2-Add</b> | <b>C3-Add</b> | <b>C4-Add</b> | <b>C5-Add</b> | <b>C6-Add</b> | <b>C7-Add</b> | <b>C16-Add</b> | <b>C19-Add</b> | <b>C34-Add</b> | <b>C38-Add</b> | <b>C39-Add</b> |
|--------------|---------------|---------------|---------------|---------------|---------------|---------------|---------------|----------------|----------------|----------------|----------------|----------------|
| <b>283</b>   | 1.05          | 1.08          | 1.11          | 1.13          | 1.12          | 1.22          | 1.09          | 1.22           | 1.16           | 1.13           | 1.04           | 1.11           |
| <b>288</b>   | 1.05          | 1.07          | 1.11          | 1.13          | 1.12          | 1.21          | 1.08          | 1.21           | 1.15           | 1.13           | 1.04           | 1.11           |
| <b>293</b>   | 1.05          | 1.07          | 1.11          | 1.12          | 1.12          | 1.21          | 1.08          | 1.20           | 1.15           | 1.12           | 1.04           | 1.11           |
| <b>298</b>   | 1.04          | 1.07          | 1.10          | 1.12          | 1.11          | 1.20          | 1.08          | 1.20           | 1.14           | 1.12           | 1.04           | 1.10           |
| <b>303</b>   | 1.04          | 1.07          | 1.10          | 1.11          | 1.11          | 1.19          | 1.08          | 1.19           | 1.14           | 1.12           | 1.04           | 1.10           |
| <b>308</b>   | 1.04          | 1.06          | 1.10          | 1.11          | 1.10          | 1.18          | 1.07          | 1.18           | 1.13           | 1.11           | 1.03           | 1.10           |
| <b>313</b>   | 1.04          | 1.06          | 1.09          | 1.11          | 1.10          | 1.18          | 1.07          | 1.18           | 1.13           | 1.11           | 1.03           | 1.09           |
| <b>318</b>   | 1.04          | 1.06          | 1.09          | 1.10          | 1.10          | 1.17          | 1.07          | 1.17           | 1.12           | 1.10           | 1.03           | 1.09           |
| <b>323</b>   | 1.04          | 1.06          | 1.09          | 1.10          | 1.09          | 1.17          | 1.07          | 1.17           | 1.12           | 1.10           | 1.03           | 1.09           |
| <b>328</b>   | 1.04          | 1.06          | 1.08          | 1.10          | 1.09          | 1.16          | 1.07          | 1.16           | 1.12           | 1.10           | 1.03           | 1.08           |
| <b>333</b>   | 1.04          | 1.05          | 1.08          | 1.09          | 1.09          | 1.16          | 1.06          | 1.16           | 1.11           | 1.09           | 1.03           | 1.08           |

**Table S11.** Cartesian coordinates of all intermediate species involved in the further reactions of H15-Abs product at 298K.

| P1-OH-pathway                                                                     |             |             |             | P3-NO-pathway                                                                     |             |             |             | P4-NO <sub>2</sub> -pathway                                                         |             |             |             |
|-----------------------------------------------------------------------------------|-------------|-------------|-------------|-----------------------------------------------------------------------------------|-------------|-------------|-------------|-------------------------------------------------------------------------------------|-------------|-------------|-------------|
| 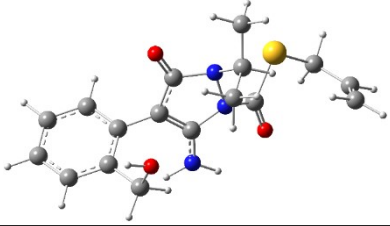 |             |             |             |  |             |             |             |  |             |             |             |
| 0 1                                                                               |             |             |             | 0 1                                                                               |             |             |             | 0 1                                                                                 |             |             |             |
| C                                                                                 | -3.54915400 | -0.45679700 | 0.71072000  | C                                                                                 | -3.47299300 | -0.59111800 | 0.65588000  | C                                                                                   | 3.38917100  | -0.53935600 | -0.63975900 |
| C                                                                                 | -2.71677600 | -0.46011000 | -0.42580400 | C                                                                                 | -2.62039100 | -0.59662500 | -0.46435100 | C                                                                                   | 2.49066100  | -0.93023500 | 0.37018500  |
| C                                                                                 | -3.26849700 | -0.74143900 | -1.68103900 | C                                                                                 | -3.14950400 | -0.89182600 | -1.72659400 | C                                                                                   | 2.96543400  | -1.68825900 | 1.44513800  |
| C                                                                                 | -4.62568700 | -1.03170900 | -1.81616600 | C                                                                                 | -4.50127700 | -1.19266900 | -1.88244000 | C                                                                                   | 4.30461400  | -2.07199600 | 1.51048400  |
| C                                                                                 | -5.44501300 | -1.05230800 | -0.68889600 | C                                                                                 | -5.34111500 | -1.20605600 | -0.76986400 | C                                                                                   | 5.18570700  | -1.70159900 | 0.49654200  |
| C                                                                                 | -4.90406900 | -0.76344300 | 0.56404900  | C                                                                                 | -4.82510400 | -0.90173600 | 0.48887300  | C                                                                                   | 4.72626900  | -0.93206800 | -0.57167800 |
| C                                                                                 | -1.27566400 | -0.15210700 | -0.32399100 | C                                                                                 | -1.18815900 | -0.26102000 | -0.34593700 | C                                                                                   | 1.07491900  | -0.51227600 | 0.34111600  |
| C                                                                                 | -0.29719900 | -0.90975900 | 0.28678200  | C                                                                                 | -0.20653000 | -0.96127100 | 0.32424100  | C                                                                                   | 0.08933600  | -0.92063600 | -0.53556400 |
| N                                                                                 | 0.93861300  | -0.26331700 | 0.14431200  | N                                                                                 | 1.01888700  | -0.29728400 | 0.16657500  | N                                                                                   | -1.11815900 | -0.30103300 | -0.18558300 |
| N                                                                                 | 0.75980400  | 0.91929200  | -0.60654900 | N                                                                                 | 0.82998500  | 0.82549100  | -0.66793500 | N                                                                                   | -0.91456100 | 0.49984100  | 0.95930200  |
| C                                                                                 | -0.63630400 | 0.99292500  | -0.88166600 | C                                                                                 | -0.56012500 | 0.86476200  | -0.95924200 | C                                                                                   | 0.46825200  | 0.38224600  | 1.27371000  |
| N                                                                                 | -0.40300300 | -2.09068400 | 0.89305200  | N                                                                                 | -0.29893400 | -2.10808500 | 0.99718800  | N                                                                                   | 0.16405400  | -1.78483700 | -1.54591200 |
| O                                                                                 | -1.13153600 | 1.95961600  | -1.47703100 | O                                                                                 | -1.06596800 | 1.78842300  | -1.61085900 | O                                                                                   | 0.98632500  | 1.02440500  | 2.19579100  |
| C                                                                                 | 1.35254000  | 2.11290000  | 0.09238300  | C                                                                                 | 1.43088500  | 2.07301000  | -0.08373700 | C                                                                                   | -1.43299300 | 1.89705500  | 0.75347500  |
| C                                                                                 | 0.48334200  | 2.56857800  | 1.25832000  | C                                                                                 | 0.56540500  | 2.64550700  | -0.08379200 | C                                                                                   | -0.52144600 | 2.69627000  | -0.16900800 |
| C                                                                                 | 2.13274400  | -0.97292100 | 0.01419200  | C                                                                                 | 2.22547800  | -0.99807500 | 0.08930900  | C                                                                                   | -2.34702800 | -0.94650000 | -0.34632500 |
| O                                                                                 | 2.33264200  | -1.98824200 | 0.65588200  | O                                                                                 | 2.44363000  | -1.94938100 | 0.81673100  | O                                                                                   | -2.57365800 | -1.62520100 | -1.33092100 |
| C                                                                                 | -3.02122000 | -0.03975900 | 2.06340300  | C                                                                                 | -2.97723400 | -0.18870900 | 2.01066400  | C                                                                                   | 2.93397200  | 0.32414700  | -1.77441100 |
| C                                                                                 | 1.64895900  | 3.21905200  | -0.90741700 | C                                                                                 | 1.73855800  | 3.07564100  | -1.18452400 | C                                                                                   | -1.68888700 | 2.57406500  | 2.09025200  |
| S                                                                                 | 3.28996400  | -0.28280000 | -1.13635100 | S                                                                                 | 3.36209400  | -0.39757100 | -1.12886200 | S                                                                                   | -3.49762300 | -0.69685900 | 0.97703500  |
| C                                                                                 | 4.68815300  | -1.38751500 | -0.79011000 | C                                                                                 | 4.79041700  | -1.42390800 | -0.67908500 | C                                                                                   | -4.93676300 | -1.51190300 | 0.22864000  |
| C                                                                                 | 5.42454400  | -1.14871500 | 0.49830500  | C                                                                                 | 5.51890800  | -1.03402400 | 0.57666800  | C                                                                                   | -5.63575800 | -0.75570900 | -0.86628900 |
| C                                                                                 | 5.11822300  | -0.28033300 | 1.45975500  | C                                                                                 | 5.18929500  | -0.08016600 | 1.44513300  | C                                                                                   | -5.27255600 | 0.40325100  | -1.41143800 |
| H                                                                                 | -5.54246900 | -0.76289000 | 1.44403800  | H                                                                                 | -5.47863200 | -0.89568400 | 1.35716200  | H                                                                                   | 5.41071500  | -0.62365000 | -1.35696600 |
| H                                                                                 | -6.50104700 | -1.28531800 | -0.78370600 | H                                                                                 | -6.39396000 | -1.44568000 | -0.88051600 | H                                                                                   | 6.22779500  | -2.00133000 | 0.53929800  |
| H                                                                                 | -5.03742700 | -1.24833600 | -2.79697600 | H                                                                                 | -4.89412800 | -1.42148100 | -2.86816100 | H                                                                                   | 4.65571000  | -2.66336400 | 2.35027800  |
| H                                                                                 | -2.62129400 | -0.73814700 | -2.55404600 | H                                                                                 | -2.48784800 | -0.88759300 | -2.58852700 | H                                                                                   | 2.27357400  | -1.97994400 | 2.23022500  |
| H                                                                                 | -2.06041100 | -0.50947000 | 2.28613700  | H                                                                                 | -2.03645100 | -0.66752500 | 2.30922700  | H                                                                                   | 2.02323700  | -0.01485700 | -2.27208300 |
| H                                                                                 | -3.73363100 | -0.33456900 | 2.84132400  | H                                                                                 | -3.69703900 | -0.42711900 | 2.79983900  | H                                                                                   | 3.71175700  | 0.45854800  | -2.52941900 |
| H                                                                                 | 0.41110100  | -2.56262500 | 1.26261300  | H                                                                                 | 0.52236300  | -2.54607200 | 1.39269700  | H                                                                                   | -0.66043200 | -2.03782100 | -2.07429300 |
| H                                                                                 | -1.29513700 | -2.56818800 | 0.86557900  | H                                                                                 | -1.16827400 | -2.62487900 | 0.94836500  | H                                                                                   | 1.01900500  | -2.31376600 | -1.66579000 |
| H                                                                                 | 2.30512000  | 1.74905200  | 0.48558000  | H                                                                                 | 2.37933000  | 1.74048900  | 0.34572700  | H                                                                                   | -2.39646300 | 1.75536400  | 0.25730500  |
| H                                                                                 | 1.02023300  | 3.32737100  | 1.83408200  | H                                                                                 | 1.10909600  | 3.45148200  | 1.53218700  | H                                                                                   | -1.00108400 | 3.64630600  | -0.42021400 |
| H                                                                                 | 0.25414900  | 1.73157600  | 1.92695500  | H                                                                                 | 0.33306900  | 1.87746000  | 1.77730100  | H                                                                                   | -0.33908800 | 2.15162100  | -1.10169600 |
| H                                                                                 | -0.45482700 | 3.00700700  | 0.90430400  | H                                                                                 | -0.37029900 | 3.05471600  | 0.63908200  | H                                                                                   | 0.43829400  | 2.91287700  | 0.31155700  |
| H                                                                                 | 0.73274100  | 3.66611900  | -1.29736100 | H                                                                                 | 0.82630100  | 3.48387400  | -1.62338400 | H                                                                                   | -0.75796200 | 2.80760000  | 2.61000500  |
| H                                                                                 | 2.22472900  | 3.99970500  | -0.40213700 | H                                                                                 | 2.31303100  | 3.90083700  | -0.75422900 | H                                                                                   | -2.22488400 | 3.50974400  | 1.90758500  |
| H                                                                                 | 2.24259700  | 2.83883500  | -1.74374100 | H                                                                                 | 2.33685800  | 2.61363800  | -1.97505300 | H                                                                                   | -2.30721200 | 1.94256400  | 2.73469100  |
| H                                                                                 | 4.33466700  | -2.42109000 | -0.84411700 | H                                                                                 | 4.46605100  | -2.46699300 | -0.62652200 | H                                                                                   | -4.63104400 | -2.50159100 | -0.12227000 |
| H                                                                                 | 5.36266400  | -1.23792000 | -1.63953200 | H                                                                                 | 5.46003500  | -1.34229500 | -1.54167400 | H                                                                                   | -5.62043900 | -1.67025400 | 1.06922500  |
| H                                                                                 | 6.29757600  | -1.79039400 | 0.61414400  | H                                                                                 | 6.40858700  | -1.63700600 | 0.75626300  | H                                                                                   | -6.53260100 | -1.25966500 | -1.22555600 |
| H                                                                                 | 5.73367600  | -0.20579600 | 2.35074300  | H                                                                                 | 5.80280500  | 0.10108600  | 2.32205800  | H                                                                                   | -5.86528800 | 0.84893100  | -2.20405100 |
| H                                                                                 | 4.25667500  | 0.38123000  | 1.39766300  | H                                                                                 | 4.31118500  | 0.54996100  | 1.31896100  | H                                                                                   | -4.38552100 | 0.94670300  | -1.09251300 |
| O                                                                                 | -2.78351300 | 1.36985300  | 2.12232700  | N                                                                                 | -2.69478200 | 1.26050600  | 2.20403300  | N                                                                                   | 2.60679300  | 1.73507200  | -1.33164800 |
| H                                                                                 | -3.63128200 | 1.82254700  | 2.00798800  | O                                                                                 | -2.78025700 | 1.93536200  | 1.21428600  | O                                                                                   | 2.88009600  | 2.09498500  | -0.20211800 |
|                                                                                   |             |             |             |                                                                                   |             |             |             | O                                                                                   | 2.08218300  | 2.45499200  | -2.16542900 |

| Int-H15-1-O <sub>2</sub> -pathway                                                 |             |             |             | Int-H15-2-O <sub>2</sub> -pathway                                                  |             |             |             |
|-----------------------------------------------------------------------------------|-------------|-------------|-------------|------------------------------------------------------------------------------------|-------------|-------------|-------------|
| 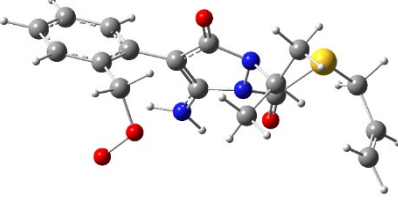 |             |             |             |  |             |             |             |
| 0 2                                                                               |             |             |             | 0 1                                                                                |             |             |             |
| C                                                                                 | -3.57444100 | 0.19407700  | -0.02797700 | C                                                                                  | -0.10680400 | -1.15995800 | 1.07060500  |
| C                                                                                 | -2.56888100 | -0.67691100 | -0.48893500 | C                                                                                  | -0.82269800 | 0.02730900  | 0.74155000  |
| C                                                                                 | -2.93582900 | -1.92236500 | -1.01022400 | C                                                                                  | 0.06930500  | 0.88348000  | 0.12250100  |
| C                                                                                 | -4.27727600 | -2.29691000 | -1.08970600 | N                                                                                  | 1.31960600  | 0.25774900  | 0.03887000  |
| C                                                                                 | -5.26980200 | -1.42346700 | -0.65119500 | N                                                                                  | 1.24626000  | -1.01400600 | 0.64733200  |
| C                                                                                 | -4.91418700 | -0.18452400 | -0.11772100 | C                                                                                  | -2.24000300 | 0.31049400  | 1.04091000  |
| C                                                                                 | -1.14331400 | -0.29959000 | -0.41290500 | C                                                                                  | -3.27279200 | -0.48847200 | 0.51227900  |
| C                                                                                 | -0.17169000 | -0.92343400 | 0.34513200  | C                                                                                  | -4.60101400 | -0.18692000 | 0.81745500  |
| N                                                                                 | 1.05306600  | -0.27537300 | 0.14045500  | C                                                                                  | -4.92186200 | 0.90053000  | 1.62999600  |
| N                                                                                 | 0.87633200  | 0.76768300  | -0.79456200 | C                                                                                  | -3.90343200 | 1.70329700  | 2.13899200  |
| C                                                                                 | -0.51053900 | 0.76611100  | -1.11681400 | C                                                                                  | -2.57233000 | 1.40455400  | 1.84852900  |
| N                                                                                 | -0.27895500 | -1.97979300 | 1.14760400  | C                                                                                  | -2.97704200 | -1.61073600 | -0.44632400 |
| O                                                                                 | -1.00407900 | 1.61406600  | -1.87313500 | O                                                                                  | -2.41462200 | -1.12822500 | -1.68641500 |
| C                                                                                 | 1.43349700  | 2.06938000  | -0.28596800 | O                                                                                  | -3.39185700 | -0.33956600 | -2.32144900 |
| C                                                                                 | 0.53098300  | 2.69068000  | 0.77308700  | N                                                                                  | -0.11710700 | 2.12540700  | -0.31497100 |
| C                                                                                 | 2.26671900  | -0.96517500 | 0.16505800  | C                                                                                  | 2.51437500  | 0.97546400  | 0.11193500  |
| O                                                                                 | 2.46763400  | -1.84999000 | 0.97658200  | S                                                                                  | 3.80597800  | 0.17821900  | 1.02603400  |
| C                                                                                 | -3.21623100 | 1.50929600  | 0.60259000  | C                                                                                  | 5.14567600  | 1.34522700  | 0.65392800  |
| C                                                                                 | 1.73680800  | 3.00490200  | -1.44520600 | C                                                                                  | 5.72685100  | 1.27239200  | -0.73041500 |
| S                                                                                 | 3.43969900  | -0.45440300 | -1.06003200 | C                                                                                  | 5.31809100  | 0.51137000  | -1.74351300 |
| C                                                                                 | 4.85755300  | -1.43076500 | -0.48441600 | C                                                                                  | 1.76429100  | -2.09283200 | -0.26566400 |
| C                                                                                 | 5.54194700  | -0.94026300 | 0.76085600  | C                                                                                  | 2.19114300  | -3.30901000 | 0.54032800  |
| C                                                                                 | 5.17983200  | 0.07622700  | 1.54078800  | O                                                                                  | -0.50952900 | -2.20227900 | 1.60525900  |
| H                                                                                 | -5.68153300 | 0.49501400  | 0.24277200  | C                                                                                  | 0.76725300  | -2.41864000 | -1.37118900 |
| H                                                                                 | -6.31575200 | -1.70611700 | -0.71440400 | O                                                                                  | 2.62539200  | 2.06505300  | -0.41947400 |
| H                                                                                 | -4.54327400 | -3.26596300 | -1.50008500 | H                                                                                  | -5.39113100 | -0.80460200 | 0.39834300  |
| H                                                                                 | -2.15973700 | -2.59541900 | -1.36521400 | H                                                                                  | -5.96015700 | 1.12327800  | 1.85420300  |
| H                                                                                 | -2.52410200 | 2.10222900  | 0.00208200  | H                                                                                  | -4.14015000 | 2.55638600  | 2.76708600  |
| H                                                                                 | -4.10328200 | 2.09534900  | 0.85027700  | H                                                                                  | -1.77569100 | 2.01936900  | 2.25977400  |
| H                                                                                 | 0.53269300  | -2.36115800 | 1.61504000  | H                                                                                  | -2.19778400 | -2.28707700 | -0.08498900 |
| H                                                                                 | -1.15353900 | -2.48856200 | 1.16465600  | H                                                                                  | -3.88015800 | -2.18336900 | -0.67380300 |
| H                                                                                 | 2.38186100  | 1.79231600  | 0.18144100  | H                                                                                  | 0.62358200  | 2.62940800  | -0.78334200 |
| H                                                                                 | 1.03967200  | 3.54749500  | 1.22335600  | H                                                                                  | -1.02983700 | 2.54875000  | -0.20839300 |
| H                                                                                 | 0.30732300  | 1.97102600  | 1.56747400  | H                                                                                  | 2.65834900  | -1.65604100 | -0.71791200 |
| H                                                                                 | -0.40919100 | 3.04255600  | 0.33617900  | H                                                                                  | 1.23686600  | -3.09139300 | -2.09401300 |
| H                                                                                 | 0.82350700  | 3.36588500  | -1.92156100 | H                                                                                  | 0.45891900  | -1.51104900 | -1.90088000 |
| H                                                                                 | 2.28865700  | 3.86739400  | -1.06085600 | H                                                                                  | -0.12185300 | -2.91563200 | -0.96931800 |
| H                                                                                 | 2.35566500  | 2.50597500  | -2.19648900 | H                                                                                  | 1.33397200  | -3.82430600 | 0.97786500  |
| H                                                                                 | 4.53776400  | -2.46958800 | -0.36290200 | H                                                                                  | 2.70733400  | -4.00514100 | -0.12685800 |
| H                                                                                 | 5.55560800  | -1.41025800 | -1.32792400 | H                                                                                  | 2.87953100  | -3.02289400 | 1.34073300  |
| H                                                                                 | 6.42723900  | -1.52206500 | 1.01614300  | H                                                                                  | 4.79325100  | 2.35786600  | 0.86975900  |
| H                                                                                 | 5.76260800  | 0.32893400  | 2.42100800  | H                                                                                  | 5.91634900  | 1.11226200  | 1.39606500  |
| H                                                                                 | 4.30436100  | 0.68905700  | 1.33595000  | H                                                                                  | 6.57277100  | 1.94440000  | -0.87241700 |
| O                                                                                 | -2.48212600 | 1.30503400  | 1.85298300  | H                                                                                  | 5.82439000  | 0.55321300  | -2.70274000 |
| O                                                                                 | -3.20714400 | 0.70777900  | 2.75112200  | H                                                                                  | 4.47754500  | -0.17418600 | -1.65792600 |
|                                                                                   |             |             |             | N                                                                                  | -3.03982400 | 1.00622200  | -2.09806200 |
|                                                                                   |             |             |             | O                                                                                  | -3.83667600 | 1.69831100  | -2.60684400 |

| Int-H15-3-O <sub>2</sub> -pathway                                                 |             |             |             | P2-O <sub>2</sub> -pathway                                                         |             |             |             |
|-----------------------------------------------------------------------------------|-------------|-------------|-------------|------------------------------------------------------------------------------------|-------------|-------------|-------------|
| 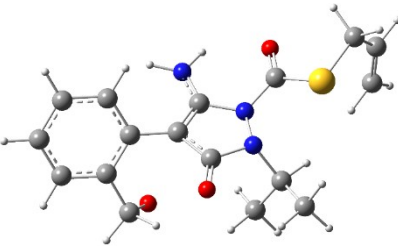 |             |             |             |  |             |             |             |
| 0 2                                                                               |             |             |             | 0 1                                                                                |             |             |             |
| C                                                                                 | -3.13313200 | -1.86145200 | -0.76670000 | C                                                                                  | -3.01847900 | -1.93345000 | -0.56933000 |
| C                                                                                 | -2.73003200 | -0.62667100 | -0.24459900 | C                                                                                  | -2.72347400 | -0.64357500 | -0.11068000 |
| C                                                                                 | -3.70396200 | 0.26228000  | 0.24906600  | C                                                                                  | -3.80453100 | 0.21362400  | 0.19749700  |
| C                                                                                 | -5.05257400 | -0.08892200 | 0.18147700  | C                                                                                  | -5.12223800 | -0.21914000 | 0.00018200  |
| C                                                                                 | -5.44624200 | -1.31778700 | -0.34934700 | C                                                                                  | -5.39574500 | -1.50579800 | -0.45113900 |
| C                                                                                 | -4.48275100 | -2.21004000 | -0.81520400 | C                                                                                  | -4.33487700 | -2.36703000 | -0.72503300 |
| C                                                                                 | -1.29857300 | -0.26761400 | -0.21719200 | C                                                                                  | -1.31306300 | -0.23004100 | -0.03115400 |
| C                                                                                 | -0.69725600 | 0.83870200  | -0.88418400 | C                                                                                  | -0.73073400 | 0.89807000  | -0.68882800 |
| N                                                                                 | 0.70528300  | 0.81798500  | -0.63770700 | N                                                                                  | 0.67425200  | 0.85810800  | -0.49598500 |
| N                                                                                 | 0.92583900  | -0.28603200 | 0.21420900  | N                                                                                  | 0.92314000  | -0.24639400 | 0.34601700  |
| C                                                                                 | -0.28953100 | -0.94343900 | 0.44245900  | C                                                                                  | -0.28699300 | -0.91528000 | 0.58835300  |
| O                                                                                 | -1.22631100 | 1.73408500  | -1.55756700 | O                                                                                  | -1.27634200 | 1.80576000  | -1.32837800 |
| N                                                                                 | -0.35893700 | -2.05097000 | 1.17653100  | N                                                                                  | -0.32271500 | -2.03591200 | 1.30758900  |
| C                                                                                 | 2.13534500  | -0.97798200 | 0.12552500  | C                                                                                  | 2.11886400  | -0.95599000 | 0.18410200  |
| O                                                                                 | 2.37609100  | -1.91557900 | 0.86356800  | O                                                                                  | 2.39347600  | -1.89146900 | 0.91203700  |
| C                                                                                 | 1.29036300  | 2.08254300  | -0.06959400 | C                                                                                  | 1.34080300  | 2.11315300  | -0.01042700 |
| C                                                                                 | 0.44053400  | 2.62951800  | 1.07077700  | C                                                                                  | 0.57017100  | 2.76020600  | 1.13333600  |
| C                                                                                 | -3.29518800 | 1.56347100  | 0.89426600  | C                                                                                  | -3.67189300 | 1.55040400  | 0.81360100  |
| O                                                                                 | -2.47395600 | 1.41522100  | 2.00009600  | O                                                                                  | -2.66323700 | 2.00979800  | 1.32370900  |
| S                                                                                 | 3.24132700  | -0.38727300 | -1.12587400 | S                                                                                  | 3.15086000  | -0.39102800 | -1.13959100 |
| C                                                                                 | 4.68644300  | -1.39660300 | -0.69177900 | C                                                                                  | 4.59407000  | -1.44233800 | -0.81261000 |
| C                                                                                 | 5.44010300  | -0.98203000 | 0.54090900  | C                                                                                  | 5.45033100  | -1.05359800 | 0.35994300  |
| C                                                                                 | 5.12231000  | -0.01776500 | 1.40226700  | C                                                                                  | 5.22114400  | -0.08918800 | 1.24867300  |
| C                                                                                 | 1.53844200  | 3.09482400  | -1.17631600 | C                                                                                  | 1.59056100  | 3.05954500  | -1.17410500 |
| H                                                                                 | -5.79932200 | 0.60286500  | 0.56291000  | H                                                                                  | -5.93684100 | 0.46366400  | 0.22831500  |
| H                                                                                 | -6.49916500 | -1.57852500 | -0.38995200 | H                                                                                  | -6.42114000 | -1.83208600 | -0.58832400 |
| H                                                                                 | -4.77824300 | -3.17095200 | -1.22458500 | H                                                                                  | -4.52709300 | -3.37384000 | -1.08253800 |
| H                                                                                 | -2.38004000 | -2.54542400 | -1.15017500 | H                                                                                  | -2.20150400 | -2.59896800 | -0.83566900 |
| H                                                                                 | -2.75705500 | 2.22900000  | 0.19174600  | H                                                                                  | -4.60857400 | 2.13530500  | 0.82914800  |
| H                                                                                 | -4.17439600 | 2.14988500  | 1.21191100  | H                                                                                  | 0.52350900  | -2.43372800 | 1.69230300  |
| H                                                                                 | 0.47327200  | -2.46213700 | 1.57797500  | H                                                                                  | -1.19460900 | -2.54266200 | 1.38318600  |
| H                                                                                 | -1.23599000 | -2.55451100 | 1.21161100  | H                                                                                  | 2.30936700  | 1.77527600  | 0.36644600  |
| H                                                                                 | 2.25977500  | 1.77484600  | 0.33087200  | H                                                                                  | 1.18029500  | 3.55362500  | 1.57363400  |
| H                                                                                 | 0.96922000  | 3.45705700  | 1.55173900  | H                                                                                  | 0.34192100  | 2.02910600  | 1.91624800  |
| H                                                                                 | 0.25583100  | 1.85792100  | 1.82594800  | H                                                                                  | -0.36498300 | 3.20181400  | 0.77801500  |
| H                                                                                 | -0.52111400 | 3.00376900  | 0.70415600  | H                                                                                  | 0.65581000  | 3.46185700  | -1.56990800 |
| H                                                                                 | 0.60352900  | 3.48660300  | -1.58112400 | H                                                                                  | 2.20244500  | 3.89443000  | -0.82085100 |
| H                                                                                 | 2.11081300  | 3.92977600  | -0.76228000 | H                                                                                  | 2.12853500  | 2.55286200  | -1.98036500 |
| H                                                                                 | 2.11807700  | 2.64854000  | -1.98943600 | H                                                                                  | 4.25428300  | -2.47716500 | -0.71327900 |
| H                                                                                 | 4.37073900  | -2.44094200 | -0.61575000 | H                                                                                  | 5.17852200  | -1.38741800 | -1.73673500 |
| H                                                                                 | 5.33605000  | -1.32441900 | -1.57029800 | H                                                                                  | 6.34541200  | -1.66776000 | 0.45452500  |
| H                                                                                 | 6.33874300  | -1.57494400 | 0.70901300  | H                                                                                  | 5.92085000  | 0.09026800  | 2.05885000  |
| H                                                                                 | 5.75406800  | 0.18178300  | 2.26209800  | H                                                                                  | 4.34262200  | 0.55110600  | 1.20389700  |
| H                                                                                 | 4.23629700  | 0.60327200  | 1.28663100  |                                                                                    |             |             |             |



**Table S12.** Standard enthalpy ( $\Delta_r H^\circ_{298K}$ ), and Gibbs free energy of reaction ( $\Delta_r G^\circ_{298K}$ ) for the  $O_2$ -addition to various carbon atom on the H15-Abs intermediate resulted from the most dominant FHT reaction at H15 hydrogen atom. Calculations were performed at the M06-2X/6-311++G(3df,3pd)//M06-2X/6-31+G(d,p) level of theory in water.

| Position          | $\Delta_r H^\circ_{298K}$ | $\Delta_r G^\circ_{298K}$ |
|-------------------|---------------------------|---------------------------|
| Int-H15-C1        | 36.0                      | 81.5                      |
| Int-H15-C2        | 1.4                       | 54.7                      |
| Int-H15-C3        | 9.7                       | 54.3                      |
| Int-H15-C4        | 246.9                     | 287.7                     |
| Int-H15-C5        | 6.5                       | 51.3                      |
| Int-H15-C6        | 9.7                       | 54.6                      |
| Int-H15-C7        | 49.7                      | 102.1                     |
| <b>Int-H15-C8</b> | <b>-115.3</b>             | <b>-72.3</b>              |

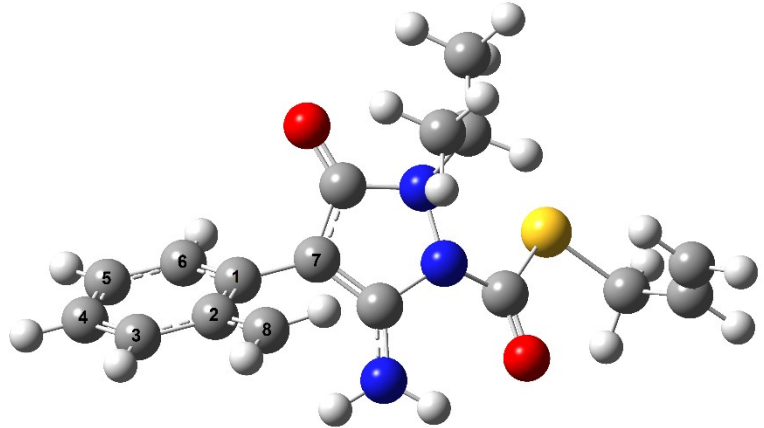

**H15-Abs radical structure**

**Table S13.** Cartesian coordinates of all intermediate species involved in the further reactions of C39-Add product.

| P5 |   |           |           |           | Structures |
|----|---|-----------|-----------|-----------|------------|
| 6  | 0 | -0.894394 | -0.855481 | -0.053614 |            |
| 6  | 0 | -1.917147 | 0.060437  | -0.204061 |            |
| 6  | 0 | -1.316579 | 1.354199  | -0.272290 |            |
| 7  | 0 | 0.096924  | 1.215450  | -0.151272 |            |
| 7  | 0 | 0.328531  | -0.168570 | -0.000262 |            |
| 6  | 0 | -3.364084 | -0.200424 | -0.302872 |            |
| 6  | 0 | -4.067963 | -0.885614 | 0.708784  |            |
| 6  | 0 | -5.445412 | -1.082695 | 0.545658  |            |
| 6  | 0 | -6.124288 | -0.604894 | -0.572093 |            |
| 6  | 0 | -5.427510 | 0.093368  | -1.559680 |            |
| 6  | 0 | -4.057439 | 0.289270  | -1.421278 |            |
| 6  | 0 | -3.389417 | -1.390124 | 1.956329  |            |
| 8  | 0 | -1.850251 | 2.466702  | -0.364744 |            |
| 6  | 0 | 0.733073  | 2.001811  | 0.965235  |            |
| 6  | 0 | 0.944592  | 3.446854  | 0.543767  |            |
| 6  | 0 | 1.516773  | -0.710814 | -0.468968 |            |
| 16 | 0 | 2.575430  | 0.435330  | -1.309663 |            |
| 6  | 0 | 4.073808  | -0.589425 | -1.465854 |            |
| 6  | 0 | 5.026093  | -0.468048 | -0.274604 |            |
| 6  | 0 | 4.508964  | -1.087731 | 1.022608  |            |
| 8  | 0 | 4.287233  | -2.482848 | 0.899431  |            |
| 7  | 0 | -0.945533 | -2.184861 | -0.020638 |            |
| 8  | 0 | 1.770205  | -1.895518 | -0.312081 |            |
| 6  | 0 | -0.046711 | 1.859321  | 2.266709  |            |
| 1  | 0 | -5.992390 | -1.608945 | 1.324036  |            |
| 1  | 0 | -7.193424 | -0.768528 | -0.667604 |            |
| 1  | 0 | -5.946140 | 0.477864  | -2.432338 |            |
| 1  | 0 | -3.503539 | 0.823039  | -2.189092 |            |
| 1  | 0 | -2.548107 | -0.751429 | 2.241699  |            |
| 1  | 0 | -3.001435 | -2.405613 | 1.818304  |            |
| 1  | 0 | -4.099736 | -1.422329 | 2.785922  |            |
| 1  | 0 | -0.100856 | -2.737336 | 0.043023  |            |
| 1  | 0 | -1.830486 | -2.640425 | -0.202545 |            |
| 1  | 0 | 1.716271  | 1.541197  | 1.093627  |            |
| 1  | 0 | 0.521393  | 2.320165  | 3.079254  |            |
| 1  | 0 | -0.204601 | 0.804814  | 2.517115  |            |
| 1  | 0 | -1.018856 | 2.358313  | 2.202933  |            |
| 1  | 0 | -0.000864 | 3.986161  | 0.462319  |            |
| 1  | 0 | 1.559036  | 3.942514  | 1.300699  |            |
| 1  | 0 | 1.468402  | 3.500094  | -0.414974 |            |
| 1  | 0 | 3.783514  | -1.625685 | -1.652657 |            |
| 1  | 0 | 4.567910  | -0.206089 | -2.361910 |            |

|           |   |           |           |           |                                                                                     |
|-----------|---|-----------|-----------|-----------|-------------------------------------------------------------------------------------|
| 1         | 0 | 5.945511  | -0.990638 | -0.559385 |                                                                                     |
| 1         | 0 | 5.271743  | -0.946142 | 1.792278  |                                                                                     |
| 1         | 0 | 3.596532  | -0.571227 | 1.358669  |                                                                                     |
| 1         | 0 | 3.442218  | -2.611601 | 0.440988  |                                                                                     |
| 8         | 0 | 5.399647  | 0.883929  | -0.046631 |                                                                                     |
| 1         | 0 | 4.632742  | 1.374229  | 0.288993  |                                                                                     |
| <b>P7</b> |   |           |           |           |                                                                                     |
| 6         | 0 | -1.075852 | -0.889797 | -0.083166 | 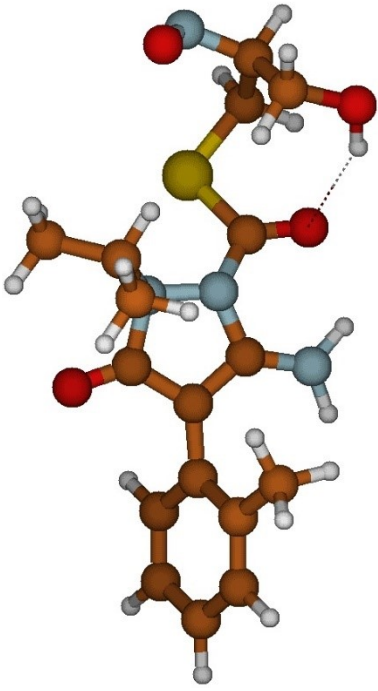 |
| 6         | 0 | -2.066837 | 0.063679  | -0.211259 |                                                                                     |
| 6         | 0 | -1.419359 | 1.333018  | -0.309691 |                                                                                     |
| 7         | 0 | -0.008850 | 1.141381  | -0.229299 |                                                                                     |
| 7         | 0 | 0.172852  | -0.249383 | -0.071704 |                                                                                     |
| 6         | 0 | -3.524977 | -0.141429 | -0.267876 |                                                                                     |
| 6         | 0 | -4.226776 | -0.799977 | 0.762626  |                                                                                     |
| 6         | 0 | -5.614870 | -0.943378 | 0.637054  |                                                                                     |
| 6         | 0 | -6.305374 | -0.438089 | -0.461164 |                                                                                     |
| 6         | 0 | -5.609458 | 0.234126  | -1.467319 |                                                                                     |
| 6         | 0 | -4.229640 | 0.376309  | -1.366672 |                                                                                     |
| 6         | 0 | -3.536660 | -1.331935 | 1.992330  |                                                                                     |
| 8         | 0 | -1.912128 | 2.464379  | -0.396291 |                                                                                     |
| 6         | 0 | 0.688660  | 1.912653  | 0.861889  |                                                                                     |
| 6         | 0 | 0.949725  | 3.341880  | 0.415321  |                                                                                     |
| 6         | 0 | 1.329686  | -0.839981 | -0.554822 |                                                                                     |
| 16        | 0 | 2.409066  | 0.259935  | -1.433902 |                                                                                     |
| 6         | 0 | 3.891552  | -0.793533 | -1.520448 |                                                                                     |
| 6         | 0 | 4.808850  | -0.665053 | -0.298951 |                                                                                     |
| 6         | 0 | 4.231414  | -1.155807 | 1.022453  |                                                                                     |
| 8         | 0 | 4.022878  | -2.559149 | 0.990116  |                                                                                     |
| 7         | 0 | -1.174560 | -2.216091 | -0.040595 |                                                                                     |
| 8         | 0 | 1.551364  | -2.028491 | -0.382587 |                                                                                     |
| 6         | 0 | -0.062925 | 1.818081  | 2.184286  |                                                                                     |
| 1         | 0 | -6.160129 | -1.449109 | 1.430097  |                                                                                     |
| 1         | 0 | -7.382268 | -0.560056 | -0.527118 |                                                                                     |
| 1         | 0 | -6.136502 | 0.639859  | -2.325196 |                                                                                     |
| 1         | 0 | -3.676780 | 0.889060  | -2.149370 |                                                                                     |
| 1         | 0 | -2.654538 | -0.737140 | 2.247395  |                                                                                     |
| 1         | 0 | -3.208070 | -2.367675 | 1.850293  |                                                                                     |
| 1         | 0 | -4.221693 | -1.321512 | 2.843516  |                                                                                     |
| 1         | 0 | -0.350466 | -2.799712 | 0.014018  |                                                                                     |
| 1         | 0 | -2.081119 | -2.640080 | -0.189272 |                                                                                     |
| 1         | 0 | 1.655131  | 1.413114  | 0.971737  |                                                                                     |
| 1         | 0 | 0.546458  | 2.260622  | 2.976842  |                                                                                     |
| 1         | 0 | -0.260616 | 0.774008  | 2.449960  |                                                                                     |
| 1         | 0 | -1.013350 | 2.359194  | 2.140562  |                                                                                     |
| 1         | 0 | 0.024865  | 3.916760  | 0.340036  |                                                                                     |
| 1         | 0 | 1.595915  | 3.823823  | 1.154556  |                                                                                     |

|                  |   |           |           |           |  |
|------------------|---|-----------|-----------|-----------|--|
| 1                | 0 | 1.459620  | 3.359789  | -0.552229 |  |
| 1                | 0 | 3.588121  | -1.833779 | -1.653381 |  |
| 1                | 0 | 4.417393  | -0.474463 | -2.423092 |  |
| 1                | 0 | 5.713013  | -1.238360 | -0.540993 |  |
| 1                | 0 | 4.953162  | -0.956155 | 1.818004  |  |
| 1                | 0 | 3.305309  | -0.626167 | 1.280581  |  |
| 1                | 0 | 3.192108  | -2.729953 | 0.519711  |  |
| 7                | 0 | 5.270338  | 0.743190  | -0.268874 |  |
| 8                | 0 | 4.958881  | 1.338349  | 0.730203  |  |
| <b>P8</b>        |   |           |           |           |  |
| 6                | 0 | -1.345672 | -0.880758 | -0.052223 |  |
| 6                | 0 | -2.328278 | 0.078061  | -0.201979 |  |
| 6                | 0 | -1.675523 | 1.347028  | -0.243888 |  |
| 7                | 0 | -0.269854 | 1.150337  | -0.098092 |  |
| 7                | 0 | -0.096567 | -0.244511 | 0.032352  |  |
| 6                | 0 | -3.783459 | -0.123481 | -0.318304 |  |
| 6                | 0 | -4.523510 | -0.790937 | 0.679366  |  |
| 6                | 0 | -5.905957 | -0.931822 | 0.501143  |  |
| 6                | 0 | -6.554474 | -0.415701 | -0.617646 |  |
| 6                | 0 | -5.821217 | 0.265170  | -1.590807 |  |
| 6                | 0 | -4.445855 | 0.405472  | -1.437499 |  |
| 6                | 0 | -3.877439 | -1.334689 | 1.927673  |  |
| 8                | 0 | -2.161614 | 2.480954  | -0.331500 |  |
| 6                | 0 | 0.368101  | 1.892796  | 1.047961  |  |
| 6                | 0 | 0.652316  | 3.332582  | 0.651967  |  |
| 6                | 0 | 1.074168  | -0.824487 | -0.432688 |  |
| 16               | 0 | 2.205026  | 0.308869  | -1.196240 |  |
| 6                | 0 | 3.605460  | -0.818541 | -1.481274 |  |
| 6                | 0 | 4.629606  | -0.865748 | -0.361726 |  |
| 6                | 0 | 4.123851  | -1.395354 | 0.988575  |  |
| 8                | 0 | 3.767529  | -2.757057 | 0.863066  |  |
| 7                | 0 | -1.451085 | -2.206855 | -0.045404 |  |
| 8                | 0 | 1.273878  | -2.023498 | -0.308776 |  |
| 6                | 0 | -0.451955 | 1.767433  | 2.326083  |  |
| 1                | 0 | -6.480760 | -1.444299 | 1.268583  |  |
| 1                | 0 | -7.628231 | -0.536092 | -0.725034 |  |
| 1                | 0 | -6.315830 | 0.679242  | -2.463864 |  |
| 1                | 0 | -3.863839 | 0.925087  | -2.194100 |  |
| 1                | 0 | -3.016465 | -0.730672 | 2.229474  |  |
| 1                | 0 | -3.525293 | -2.362048 | 1.781603  |  |
| 1                | 0 | -4.597235 | -1.350313 | 2.749538  |  |
| 1                | 0 | -0.632123 | -2.795345 | 0.028862  |  |
| 1                | 0 | -2.352880 | -2.622857 | -0.239364 |  |
| 1                | 0 | 1.325802  | 1.387631  | 1.197075  |  |
| 1                | 0 | 0.113782  | 2.193420  | 3.159040  |  |
| 1                | 0 | -0.660483 | 0.717493  | 2.557929  |  |
| 1                | 0 | -1.400167 | 2.308045  | 2.244496  |  |
| 1                | 0 | -0.267511 | 3.911229  | 0.548792  |  |
| 1                | 0 | 1.263006  | 3.793605  | 1.433361  |  |
| 1                | 0 | 1.207008  | 3.375333  | -0.289830 |  |
| 1                | 0 | 3.222145  | -1.827260 | -1.648195 |  |
| 1                | 0 | 4.068564  | -0.478065 | -2.407862 |  |
| 1                | 0 | 5.472238  | -1.487502 | -0.684427 |  |
| 1                | 0 | 4.929843  | -1.334683 | 1.719208  |  |
| 1                | 0 | 3.280848  | -0.791141 | 1.349545  |  |
| 1                | 0 | 2.883861  | -2.807578 | 0.464510  |  |
| 7                | 0 | 5.258129  | 0.497069  | -0.153977 |  |
| 8                | 0 | 5.991536  | 0.632352  | 0.810552  |  |
| 8                | 0 | 5.024664  | 1.382303  | -0.957348 |  |
| <b>Int-C39-1</b> |   |           |           |           |  |

|                  |   |           |           |           |
|------------------|---|-----------|-----------|-----------|
| 6                | 0 | -1.144060 | -0.856181 | -0.023934 |
| 6                | 0 | -2.156176 | 0.066423  | -0.201477 |
| 6                | 0 | -1.541774 | 1.351702  | -0.299703 |
| 7                | 0 | -0.129628 | 1.201863  | -0.164142 |
| 7                | 0 | 0.086589  | -0.180869 | 0.018948  |
| 6                | 0 | -3.605700 | -0.181786 | -0.297585 |
| 6                | 0 | -4.319562 | -0.829349 | 0.731693  |
| 6                | 0 | -5.698431 | -1.017237 | 0.569808  |
| 6                | 0 | -6.368834 | -0.566270 | -0.564097 |
| 6                | 0 | -5.661967 | 0.095175  | -1.569647 |
| 6                | 0 | -4.290387 | 0.281363  | -1.432439 |
| 6                | 0 | -3.649999 | -1.304190 | 1.995654  |
| 8                | 0 | -2.062852 | 2.466548  | -0.424276 |
| 6                | 0 | 0.501578  | 2.005995  | 0.943055  |
| 6                | 0 | 0.734258  | 3.438406  | 0.490618  |
| 6                | 0 | 1.266391  | -0.744215 | -0.445209 |
| 16               | 0 | 2.346782  | 0.386248  | -1.281135 |
| 6                | 0 | 3.777859  | -0.709809 | -1.532208 |
| 6                | 0 | 4.794805  | -0.700208 | -0.403945 |
| 6                | 0 | 4.300203  | -1.182596 | 0.959133  |
| 8                | 0 | 4.020735  | -2.569011 | 0.925440  |
| 7                | 0 | -1.209390 | -2.183482 | 0.042955  |
| 8                | 0 | 1.505675  | -1.930454 | -0.280551 |
| 6                | 0 | -0.295419 | 1.902499  | 2.237813  |
| 1                | 0 | -6.253118 | -1.514716 | 1.361505  |
| 1                | 0 | -7.439240 | -0.722086 | -0.658463 |
| 1                | 0 | -6.173988 | 0.458426  | -2.455213 |
| 1                | 0 | -3.728645 | 0.786420  | -2.213838 |
| 1                | 0 | -2.802555 | -0.666623 | 2.264921  |
| 1                | 0 | -3.273100 | -2.327578 | 1.888659  |
| 1                | 0 | -4.362916 | -1.304173 | 2.823654  |
| 1                | 0 | -0.370779 | -2.743357 | 0.120237  |
| 1                | 0 | -2.098881 | -2.633908 | -0.129815 |
| 1                | 0 | 1.476989  | 1.536485  | 1.094448  |
| 1                | 0 | 0.267656  | 2.377422  | 3.045717  |
| 1                | 0 | -0.466676 | 0.855978  | 2.511692  |
| 1                | 0 | -1.261673 | 2.409278  | 2.150219  |
| 1                | 0 | -0.204489 | 3.984953  | 0.383467  |
| 1                | 0 | 1.343647  | 3.945812  | 1.243791  |
| 1                | 0 | 1.271216  | 3.463697  | -0.461964 |
| 1                | 0 | 3.424197  | -1.729537 | -1.699426 |
| 1                | 0 | 4.246875  | -0.356700 | -2.453337 |
| 1                | 0 | 5.668407  | -1.283197 | -0.710510 |
| 1                | 0 | 5.099796  | -1.025803 | 1.686671  |
| 1                | 0 | 3.425567  | -0.602419 | 1.281826  |
| 1                | 0 | 3.148935  | -2.690982 | 0.517321  |
| 8                | 0 | 5.233615  | 0.682604  | -0.267875 |
| 8                | 0 | 6.355895  | 0.780528  | 0.381899  |
| <b>Int-C39-2</b> |   |           |           |           |
| 6                | 0 | -4.656006 | 0.364978  | -1.313482 |
| 6                | 0 | -3.931598 | -0.046866 | -0.183248 |
| 6                | 0 | -4.621740 | -0.495048 | 0.961804  |
| 6                | 0 | -6.021413 | -0.542674 | 0.919842  |
| 6                | 0 | -6.732600 | -0.144332 | -0.208797 |
| 6                | 0 | -6.045967 | 0.320521  | -1.331664 |
| 6                | 0 | -2.461428 | 0.044303  | -0.221776 |
| 6                | 0 | -1.538617 | -0.958521 | 0.004903  |
| 7                | 0 | -0.248072 | -0.427983 | -0.133737 |
| 7                | 0 | -0.334623 | 0.933259  | -0.494022 |
| 6                | 0 | -1.726455 | 1.228880  | -0.535203 |
| 7                | 0 | -1.730710 | -2.252924 | 0.247861  |
| 8                | 0 | -2.134925 | 2.374259  | -0.765085 |
| 6                | 0 | 0.494345  | 1.797096  | 0.420436  |
| 6                | 0 | -0.186109 | 2.006668  | 1.767523  |
| 6                | 0 | 0.839135  | -1.174531 | -0.562108 |
| 8                | 0 | 0.994015  | -2.329272 | -0.193848 |
| 6                | 0 | -3.905616 | -0.902115 | 2.223910  |
| 6                | 0 | 0.875760  | 3.092915  | -0.275295 |
| 16               | 0 | 1.930224  | -0.319143 | -1.664994 |
| 6                | 0 | 3.372412  | -1.427205 | -1.574504 |
| 6                | 0 | 4.322932  | -1.088734 | -0.432270 |
| 8                | 0 | 4.680222  | 0.286458  | -0.685022 |
| 8                | 0 | 5.639319  | 0.703866  | 0.254708  |
| 6                | 0 | 3.741659  | -1.277643 | 0.969158  |
| 8                | 0 | 3.485800  | -2.649429 | 1.213105  |

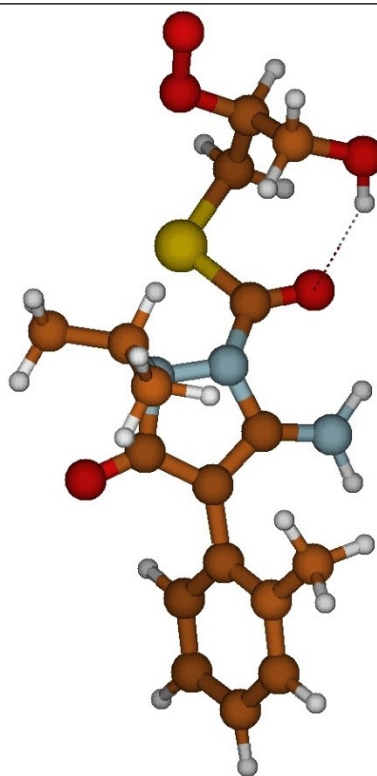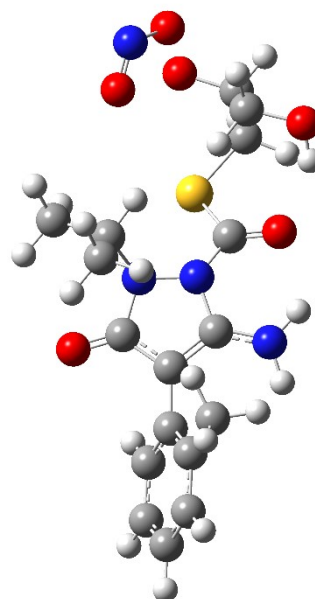

|                  |   |           |           |           |  |
|------------------|---|-----------|-----------|-----------|--|
| 1                | 0 | -6.557651 | -0.885301 | 1.801370  |  |
| 1                | 0 | -7.817541 | -0.187438 | -0.208857 |  |
| 1                | 0 | -6.588631 | 0.640902  | -2.215548 |  |
| 1                | 0 | -4.111209 | 0.715023  | -2.186310 |  |
| 1                | 0 | -2.970928 | -0.348298 | 2.352724  |  |
| 1                | 0 | -3.659385 | -1.969871 | 2.218385  |  |
| 1                | 0 | -4.541518 | -0.719062 | 3.093393  |  |
| 1                | 0 | -0.948769 | -2.883301 | 0.365472  |  |
| 1                | 0 | -2.671355 | -2.622292 | 0.199941  |  |
| 1                | 0 | 1.408688  | 1.220233  | 0.579246  |  |
| 1                | 0 | 0.512816  | 2.498996  | 2.449339  |  |
| 1                | 0 | -0.477599 | 1.049041  | 2.212473  |  |
| 1                | 0 | -1.074444 | 2.638525  | 1.671663  |  |
| 1                | 0 | 0.006048  | 3.732042  | -0.441148 |  |
| 1                | 0 | 1.585022  | 3.633071  | 0.358790  |  |
| 1                | 0 | 1.356759  | 2.889747  | -1.236555 |  |
| 1                | 0 | 3.037248  | -2.463439 | -1.494393 |  |
| 1                | 0 | 3.885758  | -1.307980 | -2.531348 |  |
| 1                | 0 | 5.219005  | -1.711358 | -0.538342 |  |
| 1                | 0 | 4.479181  | -0.960538 | 1.710668  |  |
| 1                | 0 | 2.838404  | -0.668656 | 1.109378  |  |
| 1                | 0 | 2.644334  | -2.882516 | 0.789806  |  |
| 7                | 0 | 5.110655  | 1.622439  | 1.186114  |  |
| 8                | 0 | 3.969227  | 1.837751  | 1.071250  |  |
| <b>Int-C39-3</b> |   |           |           |           |  |
| 6                | 0 | -4.029995 | 0.235570  | -1.444277 |  |
| 6                | 0 | -3.338445 | -0.224710 | -0.312413 |  |
| 6                | 0 | -4.039895 | -0.904253 | 0.704828  |  |
| 6                | 0 | -5.412745 | -1.125396 | 0.534157  |  |
| 6                | 0 | -6.089695 | -0.676739 | -0.596767 |  |
| 6                | 0 | -5.395740 | 0.016031  | -1.590181 |  |
| 6                | 0 | -1.896243 | 0.058708  | -0.205860 |  |
| 6                | 0 | -0.862574 | -0.840795 | -0.032546 |  |
| 7                | 0 | 0.350458  | -0.136443 | 0.025883  |  |
| 7                | 0 | 0.101245  | 1.242362  | -0.144028 |  |
| 6                | 0 | -1.312991 | 1.359425  | -0.285809 |  |
| 7                | 0 | -0.897439 | -2.170098 | 0.018825  |  |
| 8                | 0 | -1.860630 | 2.462849  | -0.400960 |  |
| 6                | 0 | 0.707552  | 2.050122  | 0.974049  |  |
| 6                | 0 | -0.092691 | 1.913586  | 2.263702  |  |
| 6                | 0 | 1.548709  | -0.667437 | -0.431579 |  |
| 8                | 0 | 1.809657  | -1.850830 | -0.272689 |  |
| 6                | 0 | -3.363966 | -1.377751 | 1.965917  |  |
| 6                | 0 | 0.907709  | 3.492562  | 0.538208  |  |
| 16               | 0 | 2.610384  | 0.490265  | -1.249468 |  |
| 6                | 0 | 4.080346  | -0.559393 | -1.476591 |  |
| 6                | 0 | 5.065824  | -0.460967 | -0.313471 |  |
| 8                | 0 | 5.489649  | 0.831853  | -0.078910 |  |
| 6                | 0 | 4.591404  | -1.093071 | 1.015685  |  |
| 8                | 0 | 4.342471  | -2.475976 | 0.867129  |  |
| 1                | 0 | -5.957819 | -1.647372 | 1.316735  |  |
| 1                | 0 | -7.155326 | -0.858712 | -0.698103 |  |
| 1                | 0 | -5.913172 | 0.377630  | -2.473280 |  |
| 1                | 0 | -3.478109 | 0.764925  | -2.216576 |  |
| 1                | 0 | -2.535432 | -0.721132 | 2.247974  |  |
| 1                | 0 | -2.958696 | -2.388944 | 1.847512  |  |
| 1                | 0 | -4.080753 | -1.408083 | 2.790000  |  |
| 1                | 0 | -0.045989 | -2.710698 | 0.092482  |  |
| 1                | 0 | -1.774417 | -2.638703 | -0.168551 |  |
| 1                | 0 | 1.693397  | 1.603004  | 1.125041  |  |
| 1                | 0 | 0.454931  | 2.393053  | 3.079521  |  |
| 1                | 0 | -0.240096 | 0.860348  | 2.525537  |  |
| 1                | 0 | -1.070439 | 2.397948  | 2.176796  |  |
| 1                | 0 | -0.043218 | 4.018079  | 0.433388  |  |
| 1                | 0 | 1.502077  | 4.005944  | 1.299316  |  |
| 1                | 0 | 1.447428  | 3.540992  | -0.411913 |  |
| 1                | 0 | 3.765222  | -1.588766 | -1.660083 |  |
| 1                | 0 | 4.553671  | -0.177793 | -2.384134 |  |
| 1                | 0 | 5.986032  | -1.013845 | -0.590598 |  |
| 1                | 0 | 5.391471  | -0.970734 | 1.747810  |  |
| 1                | 0 | 3.700311  | -0.565929 | 1.381220  |  |
| 1                | 0 | 3.464388  | -2.582301 | 0.467763  |  |
| <b>P6</b>        |   |           |           |           |  |

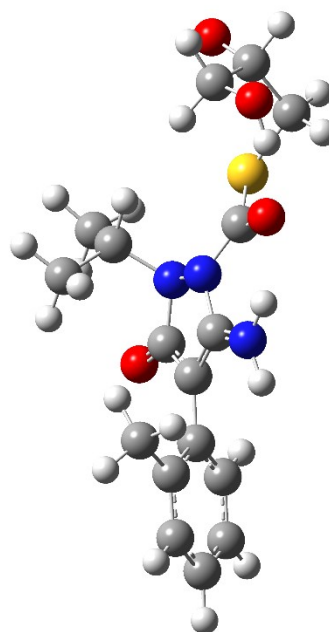

|    |   |           |           |           |
|----|---|-----------|-----------|-----------|
| 6  | 0 | -3.873343 | -0.265634 | -1.510702 |
| 6  | 0 | -3.204390 | -0.460432 | -0.291535 |
| 6  | 0 | -3.881222 | -1.068509 | 0.785641  |
| 6  | 0 | -5.202857 | -1.490158 | 0.589155  |
| 6  | 0 | -5.855777 | -1.304975 | -0.626426 |
| 6  | 0 | -5.189643 | -0.680740 | -1.682317 |
| 6  | 0 | -1.816481 | 0.019889  | -0.169476 |
| 6  | 0 | -0.693517 | -0.699017 | 0.189237  |
| 7  | 0 | 0.420859  | 0.156483  | 0.176868  |
| 7  | 0 | 0.017506  | 1.444747  | -0.234880 |
| 6  | 0 | -1.390502 | 1.355604  | -0.443869 |
| 7  | 0 | -0.564001 | -1.995627 | 0.458960  |
| 8  | 0 | -2.059310 | 2.346456  | -0.760178 |
| 6  | 0 | 0.462828  | 2.500885  | 0.742270  |
| 6  | 0 | -0.377526 | 2.480193  | 2.013229  |
| 6  | 0 | 1.686989  | -0.284478 | -0.180817 |
| 8  | 0 | 2.107056  | -1.375690 | 0.171656  |
| 6  | 0 | -3.235890 | -1.258071 | 2.134323  |
| 6  | 0 | 0.500551  | 3.862554  | 0.067168  |
| 16 | 0 | 2.637558  | 0.852011  | -1.151775 |
| 6  | 0 | 4.133220  | -0.170629 | -1.223566 |
| 6  | 0 | 4.657855  | -0.524029 | 0.157765  |
| 8  | 0 | 4.796773  | 0.324393  | 1.020509  |
| 6  | 0 | 5.073086  | -1.956871 | 0.441279  |
| 8  | 0 | 4.543069  | -2.916031 | -0.447510 |
| 1  | 0 | -5.728663 | -1.958516 | 1.417470  |
| 1  | 0 | -6.882368 | -1.637678 | -0.746259 |
| 1  | 0 | -5.689744 | -0.523385 | -2.632848 |
| 1  | 0 | -3.342258 | 0.211787  | -2.329907 |
| 1  | 0 | -2.512290 | -0.465588 | 2.347743  |
| 1  | 0 | -2.705287 | -2.214870 | 2.194017  |
| 1  | 0 | -3.995579 | -1.256985 | 2.919660  |
| 1  | 0 | 0.343832  | -2.399440 | 0.647945  |
| 1  | 0 | -1.359402 | -2.603155 | 0.309999  |
| 1  | 0 | 1.488298  | 2.219221  | 0.995228  |
| 1  | 0 | 0.065851  | 3.156342  | 2.749128  |
| 1  | 0 | -0.407856 | 1.475636  | 2.448511  |
| 1  | 0 | -1.401612 | 2.812731  | 1.816222  |
| 1  | 0 | -0.503116 | 4.228321  | -0.156997 |
| 1  | 0 | 0.983191  | 4.572619  | 0.744606  |
| 1  | 0 | 1.079303  | 3.822716  | -0.860189 |
| 1  | 0 | 3.949167  | -1.056806 | -1.828215 |
| 1  | 0 | 4.887130  | 0.449717  | -1.719903 |
| 1  | 0 | 6.164415  | -1.996705 | 0.353466  |
| 1  | 0 | 4.806421  | -2.167141 | 1.483481  |
| 1  | 0 | 3.578108  | -2.906718 | -0.355354 |

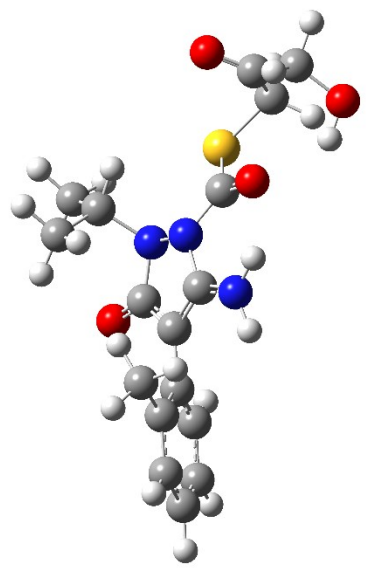

Supplement: d4em00606b1.pdf [file d4em00606b1.pdf]
